# Supplementary material for: Widespread selection for high and low secondary structure in coding sequences across all domains of life
Source: bioRxiv preprint, doi:10.1101/524538, version 3 (2019-01-23)
Supplement: Supplementary Table 3 [file 524538_file04.xlsx]

## Sheet: H. sapiens
gene_ID	gene_name	DBF_score	TPM_adipose.tissue	TPM_adrenal.gland	TPM_brain	TPM_breast	TPM_colon	TPM_heart	TPM_kidney	TPM_leukocyte	TPM_liver	TPM_lung	TPM_lymph.node	TPM_ovary	TPM_prostate.gland	TPM_skeletal.muscle.tissue	TPM_testis	TPM_thyroid.gland	TPM_mean	TPM_sd	ppm_value	ppm_TPM_ratio		Avg. values for specific fractions
ENSG00000010244	ZNF207	1	20	38	22	21	14	9	20	36	9	31	32	35	28	8	29	35	24.1875	10.2841	33.1	1.36848			avg. DBF score	avg. TPM	avg. ppm	avg. ppm/TPM
ENSG00000012061	ERCC1	1	19	25	13	17	10	13	10	17	6	17	16	32	21	23	19	23	17.5625	6.4907	2.68	0.152598		total	0.533423	61.0866	61.8586	1.57098
ENSG00000018625	ATP1A2	1	24	23	646	39	68	107	5	0.2	0.4	8	23	16	79	748	52	118	122.287	228.034	21.6	0.176633		DBFscore intermediate	0.526384	47.4325	57.6828	1.59158
ENSG00000036530	CYP46A1	1	0.4	2	15	2	0.3	0.5	0.5	0.5	0.3	0.5	1	3	1	0.2	1	1	1.825	3.59713	0.034	0.0186301		DBFscore>0.95	0.980181	86.5646	76.1748	1.09425
ENSG00000057935	MTA3	1	6	8	19	10	8	3	6	4	2	8	10	27	18	2	24	12	10.4375	7.69388	5.81	0.556647		DBFscore<0.05	0.018197	273.332	117.371	1.88203
ENSG00000060656	PTPRU	1	9	3	10	14	5	4	3	0.4	5	12	4	26	18	28	10	17	10.525	8.25328	0.225	0.0213777
ENSG00000060762	MPC1	1	52	67	154	98	45	346	191	65	360	77	79	70	90	100	64	151	125.562	97.4241	33.3	0.265207
ENSG00000065548	ZC3H15	1	54	82	112	58	77	24	63	78	40	69	76	124	90	42	100	157	77.875	33.7636	62.8	0.806421		Standard deviation
ENSG00000067225	PKM	1	91	183	274	123	89	134	257	279	7	135	175	161	216	79	170	214	161.688	75.6613	4482	27.7201			avg. DBF score	avg. TPM	avg. ppm	avg. ppm/TPM
ENSG00000067445	TRO	1	1	3	15	7	0.8	0.6	4	0.5	1	2	4	15	3	1	3	4	4.05625	4.61158	0.581	0.143236		total	0.297566	765.415	547.035	18.4983
ENSG00000069020	MAST4	1	17	11	12	25	8	18	9	6	2	16	10	23	13	11	12	9	12.625	5.98749	0.658	0.0521188		DBFscore intermediate	0.264559	409.852	408.37	19.1302
ENSG00000070010	UFD1	1	14	24	13	12	9	6	12	15	12	14	25	16	19	13	18	19	15.0625	5.0129	97.3	6.45975		DBFscore>0.95	0.0141501	1089.32	413.465	3.08897
ENSG00000070610	GBA2	1	12	33	40	15	15	15	67	30	14	40	54	33	47	28	23	41	31.6875	15.9905	0.633	0.0199763		DBFscore<0.05	0.0144895	2702.69	1700.85	19.4765
ENSG00000071994	PDCD2	1	15	35	13	18	14	8	21	31	11	14	27	35	23	11	25	34	20.9375	9.28417	1.6	0.0764179
ENSG00000073803	MAP3K13	1	5	8	12	7	6	2	9	4	4	11	5	12	9	0.7	8	11	7.10625	3.49771	0.058	0.00816183
ENSG00000074590	NUAK1	1	32	24	82	33	14	18	10	0.9	4	13	19	18	13	9	12	15	19.8062	18.7015	0.264	0.0133291
ENSG00000075188	NUP37	1	7	12	3	9	5	5	11	13	4	5	8	16	13	5	17	16	9.3125	4.7289	23.5	2.52349
ENSG00000079337	RAPGEF3	1	13	12	7	11	3	3	15	0.2	0.2	8	13	12	7	1	4	14	7.7125	5.24949	0.047	0.006094
ENSG00000083844	ZNF264	1	11	18	11	14	6	4	10	23	2	9	12	24	11	4	17	13	11.8125	6.37933	0.281	0.0237884
ENSG00000084072	PPIE	1	6	25	10	7	9	4	8	12	4	7	12	17	19	5	15	17	11.0625	6.08242	28.7	2.59435
ENSG00000090615	GOLGA3	1	41	42	20	43	16	9	20	20	10	15	40	60	27	13	27	33	27.25	14.5854	17.5	0.642202
ENSG00000090659	CD209	1	33	199	1	16	3	12	4	2	4	10	103	4	30	1	7	3	27	52.3807	1.12	0.0414815
ENSG00000091592	NLRP1	1	9	20	43	7	3	1	2	27	0.8	11	25	15	10	0.7	10	9	12.0938	11.6476	0.032	0.00264599
ENSG00000096654	ZNF184	1	3	7	10	4	4	2	8	21	1	8	13	18	14	4	24	7	9.25	6.95222	0.107	0.0115676
ENSG00000097007	ABL1	1	70	38	26	38	64	13	18	23	7	67	37	80	126	19	46	67	46.1875	31.1966	2.82	0.0610555
ENSG00000099998	GGT5	1	56	46	6	17	12	6	19	0.1	7	5	25	14	14	4	20	30	17.5688	15.4627	7.67	0.436571
ENSG00000100221	JOSD1	1	52	37	41	28	28	12	22	44	8	56	53	76	57	15	40	43	38.25	18.5921	0.362	0.00946405
ENSG00000100603	SNW1	1	92	102	83	77	66	27	51	139	24	99	78	144	114	64	175	142	92.3125	42.7594	45.6	0.493974
ENSG00000100731	PCNX1	1	19	18	17	19	12	15	10	43	5	19	24	37	22	14	23	17	19.625	9.37994	0.007	0.000356688
ENSG00000100897	DCAF11	1	15	28	26	16	12	16	37	48	70	21	27	31	32	22	23	54	29.875	15.7433	2	0.0669456
ENSG00000101444	AHCY	1	28	53	25	36	47	24	50	37	71	40	47	97	81	31	84	103	53.375	25.8608	460	8.61827
ENSG00000103152	MPG	1	29	43	12	23	19	6	9	18	8	17	17	32	21	11	20	53	21.125	12.8108	15.9	0.752663
ENSG00000105383	CD33	1	2	5	0.9	2	0.4	0.8	1	32	0.9	3	4	1	2	0.1	1	0.8	3.55625	7.7016	0.605	0.170123
ENSG00000105518	TMEM205	1	53	58	61	49	35	26	75	41	70	54	39	73	89	40	54	101	57.375	20.225	46.4	0.808715
ENSG00000106330	MOSPD3	1	13	12	10	9	8	3	9	13	10	12	11	22	23	3	26	13	12.3125	6.4469	0.305	0.0247716
ENSG00000107738	VSIR	1	78	55	15	29	23	11	10	405	5	53	69	69	31	5	14	13	55.3125	96.5075	7.81	0.141198
ENSG00000107960	STN1	1	32	44	21	30	15	22	26	58	12	80	33	27	45	20	46	32	33.9375	17.4144	0.611	0.0180037
ENSG00000108671	PSMD11	1	45	44	33	33	18	17	23	32	26	37	29	47	34	79	43	53	37.0625	15.2248	757	20.425
ENSG00000108883	EFTUD2	1	17	30	13	14	8	9	15	47	9	12	15	23	18	33	24	26	19.5625	10.5006	145	7.41214
ENSG00000109685	NSD2	1	9	8	12	5	5	4	4	7	2	7	9	8	9	5	20	8	7.625	4.14528	1.9	0.24918
ENSG00000109920	FNBP4	1	17	58	21	19	11	10	16	21	5	36	37	47	45	9	20	58	26.875	17.4848	8.16	0.303628
ENSG00000110931	CAMKK2	1	23	36	57	25	15	5	14	57	13	20	27	29	38	4	20	14	24.8125	15.787	2.94	0.118489
ENSG00000111364	DDX55	1	6	17	9	8	5	1	6	9	4	5	16	17	12	2	10	15	8.875	5.23927	6.93	0.780845
ENSG00000114026	OGG1	1	3	6	4	4	3	1	6	7	2	4	5	12	9	0.6	5	7	4.9125	2.94661	0.029	0.00590331
ENSG00000114854	TNNC1	1	1	3	0.7	117	1	2223	9	1	0.3	48	20	2	4	1150	103	677	272.5	608.91	15.4	0.0565138
ENSG00000115159	GPD2	1	21	16	42	24	13	6	14	26	2	22	16	34	29	36	15	36	22	11.3373	83	3.77273
ENSG00000115207	GTF3C2	1	11	34	10	14	6	6	16	31	6	12	24	26	20	13	21	40	18.125	10.4809	8.74	0.482207
ENSG00000115484	CCT4	1	119	155	111	122	194	46	124	165	56	140	173	311	233	98	266	229	158.875	73.1937	766	4.8214
ENSG00000115685	PPP1R7	1	41	47	70	45	40	19	36	54	24	42	37	66	61	46	156	58	52.625	30.8542	124	2.35629
ENSG00000116117	PARD3B	1	9	7	4	11	18	3	8	0.1	1	11	8	18	18	3	14	10	8.94375	5.9057	1.17	0.130818
ENSG00000116701	NCF2	1	34	23	8	21	8	3	5	844	3	84	26	13	10	4	10	5	68.8125	207.688	52.7	0.765849
ENSG00000116962	NID1	1	423	72	10	92	195	51	80	24	64	109	139	102	104	31	90	61	102.938	96.6233	48.1	0.467274
ENSG00000117036	ETV3	1	27	23	14	41	8	7	12	38	3	29	11	36	21	7	29	24	20.625	12.1209	1.46	0.0707879
ENSG00000117153	KLHL12	1	27	33	42	33	18	13	39	44	11	14	27	61	45	10	92	48	34.8125	21.4327	1.28	0.0367684
ENSG00000117859	OSBPL9	1	21	27	17	30	19	14	30	25	32	29	21	42	35	32	32	52	28.625	9.58384	6.7	0.234061
ENSG00000119673	ACOT2	1	23	17	12	58	9	20	24	9	37	10	8	10	31	13	10	22	19.5625	13.3864	9.58	0.489712
ENSG00000119737	GPR75	1	0.9	4	19	2	0.5	1	1	1	0.8	0.3	4	3	2	0.1	2	4	2.85	4.50807	0.446	0.156491
ENSG00000121297	TSHZ3	1	9	6	11	7	15	2	3	14	1	14	7	86	41	3	18	14	15.6875	21.0324	0.127	0.00809562
ENSG00000121481	RNF2	1	25	24	13	19	14	6	13	41	4	16	23	49	23	9	52	21	22	14.2033	7.47	0.339545
ENSG00000122378	FAM213A	1	234	39	122	220	55	31	53	3	22	16	46	35	58	12	58	80	67.75	68.448	54.3	0.801476
ENSG00000122545	2007-09-01	1	49	80	199	51	67	34	41	108	12	87	86	111	105	22	85	57	74.625	44.9472	277	3.71189
ENSG00000122566	HNRNPA2B1	1	179	462	259	229	236	123	330	321	117	323	380	492	275	135	417	546	301.5	132.583	1408	4.66998
ENSG00000122687	MRM2	1	13	43	25	23	12	7	18	38	12	7	21	41	24	14	29	33	22.5	11.6905	0.423	0.0188
ENSG00000123349	PFDN5	1	124	278	124	133	183	49	116	355	54	280	267	269	319	61	195	192	187.438	98.0843	143	0.762921
ENSG00000123353	ORMDL2	1	21	27	5	17	10	3	19	32	14	19	13	26	17	5	28	24	17.5	8.77116	2.64	0.150857
ENSG00000123992	DNPEP	1	25	31	8	23	14	15	16	20	12	21	16	34	34	45	31	25	23.125	9.87843	73.7	3.18703
ENSG00000125875	TBC1D20	1	23	26	23	24	16	10	19	30	7	31	41	44	41	16	32	28	25.6875	10.7748	1.12	0.043601
ENSG00000126243	LRFN3	1	7	5	5	4	3	2	4	7	2	3	6	14	9	7	6	8	5.75	3.04412	0.305	0.0530435
ENSG00000127125	PPCS	1	32	59	30	62	27	12	56	60	27	23	23	47	60	10	44	82	40.875	20.7874	63.9	1.5633
ENSG00000127399	LRRC61	1	2	6	2	2	3	0.5	7	7	8	3	9	20	6	0.4	7	9	5.74375	4.81359	0.003	0.000522307
ENSG00000131016	AKAP12	1	188	55	89	101	197	12	39	0.6	11	214	60	201	108	9	150	92	95.4125	74.8045	25.3	0.265164
ENSG00000131043	AAR2	1	24	38	13	13	14	9	27	40	15	18	25	42	43	18	30	36	25.3125	11.603	5.67	0.224
ENSG00000131844	MCCC2	1	18	25	18	28	6	44	45	22	61	12	15	25	37	11	18	73	28.625	18.7719	128	4.47162
ENSG00000132031	MATN3	1	3	2	7	1	2	0.3	6	0.2	0.1	23	2	2	1	0.5	5	2	3.56875	5.57742	0.804	0.225289
ENSG00000132466	ANKRD17	1	28	24	33	25	21	15	27	38	11	29	29	43	33	25	31	42	28.375	8.64774	7.7	0.271366
ENSG00000134852	CLOCK	1	15	15	18	16	13	13	13	11	7	14	14	33	18	14	32	34	17.5	8.11583	0.637	0.0364
ENSG00000135424	ITGA7	1	57	86	16	119	27	67	9	0.1	8	17	39	20	49	107	34	59	44.6313	35.8244	6.81	0.152584
ENSG00000135905	DOCK10	1	1	15	24	3	2	0.6	3	57	2	5	22	12	2	0.6	3	2	9.6375	14.7459	10.3	1.06874
ENSG00000135976	ANKRD36	1	0.7	3	5	1	0.6	0.5	0.8	0.4	0.1	1	0.5	3	2	0.1	2	2	1.41875	1.34076	0.048	0.0338326
ENSG00000136986	DERL1	1	51	61	20	46	25	16	35	62	29	45	59	45	38	35	42	35	40.25	13.8972	12.3	0.30559
ENSG00000137267	TUBB2A	1	21	14	258	84	19	6	31	2	26	17	7	18	17	7	17	11	34.6875	62.4251	846	24.3892
ENSG00000137571	SLCO5A1	1	0.1	3	0.2	0.7	0.2	6	0.3	0.1	0.1	0.4	0.7	0.4	0.2	4	0.6	5	1.375	1.96044	0.329	0.239273
ENSG00000138095	LRPPRC	1	28	51	71	42	41	43	44	58	21	25	26	77	72	55	73	104	51.9375	22.9273	327	6.29603
ENSG00000139173	TMEM117	1	4	8	8	6	6	5	4	1	3	3	7	10	10	3	9	7	5.875	2.72947	0.853	0.145191
ENSG00000139287	TPH2	1	0.3	0.5	1	0.6	0.3	0.2	0.3	0.4	0.1	0.8	0.3	0.4	0.5	0.2	1	1	0.49375	0.302145	0.259	0.524557
ENSG00000141867	BRD4	1	31	34	20	16	15	9	13	34	8	34	34	44	29	33	27	29	25.625	10.6763	15.5	0.604878
ENSG00000143515	ATP8B2	1	23	42	9	14	15	4	12	65	2	32	64	62	28	2	31	36	27.5625	21.6609	0.505	0.018322
ENSG00000144161	ZC3H8	1	2	12	7	4	4	3	6	5	2	3	9	14	7	4	9	13	6.5	3.89872	71.7	11.0308
ENSG00000144455	SUMF1	1	9	18	7	22	9	2	20	18	8	12	11	19	16	0.7	11	23	12.8562	6.82622	1.91	0.148566
ENSG00000144642	RBMS3	1	74	23	4	47	24	9	11	0.3	2	39	25	37	34	10	30	46	25.9563	20.0324	2.32	0.0893812
ENSG00000146072	TNFRSF21	1	34	32	77	89	31	10	56	4	5	69	13	35	80	5	18	19	36.0625	29.1261	0.219	0.00607279
ENSG00000147251	DOCK11	1	58	31	4	90	19	5	16	141	1	22	44	11	29	3	15	37	32.875	37.1104	3.89	0.118327
ENSG00000147548	NSD3	1	22	23	27	17	16	6	12	41	3	24	23	36	26	8	18	20	20.125	10.1382	1.17	0.0581366
ENSG00000149294	NCAM1	1	2	12	183	2	34	55	1	7	0.4	2	6	38	63	4	13	40	28.9	46.0049	63.7	2.20415
ENSG00000150347	ARID5B	1	117	74	42	71	49	31	22	24	3	77	75	53	107	263	37	29	67.125	60.8275	0.931	0.0138696
ENSG00000151065	DCP1B	1	4	9	5	5	8	1	6	11	3	6	7	15	21	10	21	11	8.9375	5.84772	1.95	0.218182
ENSG00000152894	PTPRK	1	18	20	36	21	20	11	21	3	14	33	14	34	38	5	17	21	20.375	10.4107	3.1	0.152147
ENSG00000153574	RPIA	1	39	63	8	38	27	10	22	64	6	24	36	55	25	22	44	39	32.625	18.0291	42.8	1.31188
ENSG00000155657	TTN	1	0.3	0.7	0.3	11	0.1	202	0.2	0.4	0.1	0.3	1	0.6	0.4	267	9	86	36.2125	81.1221	18.3	0.50535
ENSG00000156042	CFAP70	1	0.5	2	3	2	0.3	0.5	2	0.2	0.3	5	1	11	2	0.4	16	4	3.1375	4.37704	0.795	0.253386
ENSG00000157212	PAXIP1	1	3	6	3	3	1	2	3	6	2	2	5	9	5	2	10	5	4.1875	2.58763	1.46	0.348657
ENSG00000158201	ABHD3	1	5	8	8	11	8	2	18	34	24	16	42	11	14	1	9	25	14.75	11.4339	0.097	0.00657627
ENSG00000158352	SHROOM4	1	16	6	11	9	4	6	8	0.3	0.5	66	5	5	4	0.5	4	5	9.39375	15.6241	0.67	0.071324
ENSG00000159374	M1AP	1	0.3	0.3	1	1	0.2	0.1	0.6	1	0.1	0.1	0.4	0.9	0.3	0.1	10	3	1.2125	2.45163	0.188	0.155052
ENSG00000160051	IQCC	1	1	5	3	3	1	0.4	3	0.9	0.3	1	4	5	4	0.7	9	8	3.08125	2.66639	0.036	0.0116836
ENSG00000160299	PCNT	1	6	8	13	7	3	7	4	8	2	3	9	10	7	102	15	35	14.9375	24.4717	0.857	0.0573724
ENSG00000161298	ZNF382	1	0.5	2	5	2	1	2	1	1	0.2	0.6	2	4	3	0.2	2	2	1.78125	1.33976	0.276	0.154947
ENSG00000161649	CD300LG	1	137	7	0.3	59	6	18	3	0.2	0.1	10	4	3	7	4	17	1	17.2875	34.9918	3.01	0.174114
ENSG00000162438	CTRC	1	0.4	2	0.7	1	0.2	0.3	0.2	0.3	0.1	0.5	0.3	0.8	0.4	0.1	0.7	0.6	0.5375	0.468864	2.59	4.8186
ENSG00000163125	RPRD2	1	18	20	28	21	19	9	16	45	6	12	21	63	45	41	38	37	27.4375	15.7817	9.91	0.361185
ENSG00000163584	RPL22L1	1	17	62	14	21	21	5	13	24	27	50	52	43	33	6	40	26	28.375	16.8953	49.5	1.74449
ENSG00000163626	COX18	1	7	13	12	12	2	5	8	10	7	6	7	15	8	2	9	12	8.4375	3.75888	0.161	0.0190815
ENSG00000163939	PBRM1	1	25	28	13	32	20	15	13	49	7	15	24	52	36	12	33	33	25.4375	13.2059	13.5	0.530713
ENSG00000166436	TRIM66	1	2	9	4	3	0.9	0.9	3	2	2	0.9	3	3	5	0.7	6	6	3.2125	2.30648	0.031	0.00964981
ENSG00000167766	ZNF83	1	7	17	9	14	10	3	15	8	1	17	19	41	23	0.8	13	24	13.8625	10.1487	0.066	0.00476105
ENSG00000167785	ZNF558	1	4	7	6	5	4	2	5	4	3	4	8	15	9	2	6	10	5.875	3.36403	0.16	0.027234
ENSG00000168101	NUDT16L1	1	7	18	14	8	6	10	16	25	8	9	22	19	23	2	14	28	14.3125	7.63954	23	1.60699
ENSG00000168477	TNXB	1	31	29	2	51	23	11	3	0.2	0.9	25	18	114	15	5	10	14	22.0063	28.0588	26	1.18148
ENSG00000168502	MTCL1	1	0.6	0.4	6	0.4	7	1	1	0.1	0.5	0.4	0.6	2	5	0.4	5	1	1.9625	2.33805	1.24	0.631847
ENSG00000170145	SIK2	1	91	16	29	90	16	10	24	13	14	39	22	35	29	46	17	47	33.625	24.993	0.623	0.0185279
ENSG00000170266	GLB1	1	18	29	10	30	11	7	35	78	26	23	26	31	30	3	22	48	26.6875	17.8651	35.3	1.32272
ENSG00000170802	FOXN2	1	30	29	31	37	12	8	14	94	8	22	31	14	30	18	23	17	26.125	20.2283	0.483	0.018488
ENSG00000172534	HCFC1	1	24	30	15	17	11	8	12	38	8	17	29	42	21	13	26	28	21.1875	10.3552	32.9	1.5528
ENSG00000172893	DHCR7	1	15	16	56	25	9	8	15	6	92	29	13	107	13	8	40	25	29.8125	30.3408	26.5	0.888889
ENSG00000173210	ABLIM3	1	133	32	11	56	36	43	29	8	58	21	23	6	39	22	12	20	34.3125	30.661	1.7	0.0495446
ENSG00000173376	NDNF	1	4	5	2	4	16	4	15	0.3	0.9	119	11	33	20	3	11	4	15.7625	28.8682	0.456	0.0289294
ENSG00000173581	CCDC106	1	6	14	17	9	5	4	9	3	4	3	7	14	9	4	24	21	9.5625	6.60271	0.815	0.0852288
ENSG00000174151	CYB561D1	1	3	9	4	6	3	2	9	24	2	2	12	11	7	2	4	14	7.125	5.98749	0.277	0.0388772
ENSG00000174485	DENND4A	1	14	23	18	10	11	5	12	37	7	19	17	28	16	10	16	21	16.5	8.11583	3.6	0.218182
ENSG00000175895	PLEKHF2	1	17	63	11	30	17	9	49	120	12	33	73	38	29	15	31	33	36.25	28.9217	7.09	0.195586
ENSG00000175899	A2M	1	820	894	96	502	689	360	370	2	1904	3094	806	407	873	104	432	244	724.812	778.925	1970	2.71794
ENSG00000176542	USF3	1	14	10	6	11	4	7	7	24	5	6	9	13	10	14	9	13	10.125	4.89728	0.01	0.000987654
ENSG00000178057	NDUFAF3	1	38	57	41	25	18	28	34	37	25	37	20	56	51	48	138	58	44.4375	28.1424	42	0.945148
ENSG00000178397	FAM220A	1	10	15	48	21	18	18	12	26	5	13	23	38	33	47	95	31	28.3125	21.8532	0	0
ENSG00000179855	GIPC3	1	9	26	0.4	4	2	2	3	2	0.7	8	7	4	4	0.6	4	3	4.98125	6.15361	8.96	1.79875
ENSG00000180992	MRPL14	1	34	62	25	42	45	25	39	50	68	188	54	42	55	119	104	92	65.25	42.468	19.6	0.300383
ENSG00000181016	LSMEM1	1	3	1	2	6	3	1	6	2	1	3	7	3	3	3	3	6	3.3125	1.92246	1.09	0.329057
ENSG00000182359	KBTBD3	1	1	3	8	4	3	2	5	5	0.9	4	5	6	9	1	6	7	4.36875	2.4824	0.535	0.122461
ENSG00000183527	PSMG1	1	12	35	20	18	14	7	19	13	22	11	13	34	20	22	156	42	28.625	35.2815	20.2	0.705677
ENSG00000183530	PRR14L	1	11	14	11	12	5	3	9	28	4	7	20	24	12	4	16	13	12.0625	7.20619	0.291	0.0241244
ENSG00000183763	TRAIP	1	0.7	2	1	0.9	0.6	0.3	0.5	0.7	0.2	0.3	1	2	1	0.4	5	1	1.1	1.16676	0.516	0.469091
ENSG00000184838	PRR16	1	7	6	3	3	5	9	3	0.6	0.2	14	14	4	15	2	4	9	6.175	4.7771	0.257	0.0416194
ENSG00000184887	BTBD6	1	63	42	42	150	32	19	26	28	16	32	55	42	43	40	93	55	48.625	32.8672	0.275	0.00565553
ENSG00000185522	LMNTD2	1	0.3	2	0.1	0.6	0.3	0.1	2	0.8	0.9	2	2	0.6	1	0.1	3	3	1.175	1.00962	0.003	0.00255319
ENSG00000186130	ZBTB6	1	8	22	23	13	6	6	15	38	5	6	20	25	14	10	19	26	16	9.34523	0.176	0.011
ENSG00000186187	ZNRF1	1	6	8	5	6	5	3	3	3	4	14	7	7	9	13	10	11	7.125	3.4809	1.05	0.147368
ENSG00000186283	TOR3A	1	13	51	18	15	12	4	17	39	7	22	41	34	17	10	11	25	21	13.5105	1.83	0.0871429
ENSG00000196724	ZNF418	1	1	5	8	2	2	2	2	0.7	0.4	1	2	5	7	0.7	5	6	3.1125	2.47841	0.175	0.0562249
ENSG00000196735	HLA-DQA1	1	9	60	5	10	1	4	8	78	0.9	154	17	19	12	5	6	6	24.6812	40.6876	16.3	0.66042
ENSG00000196967	ZNF585A	1	2	2	3	2	2	2	2	3	0.4	2	5	5	6	1	4	4	2.8375	1.55644	0.063	0.0222026
ENSG00000197355	UAP1L1	1	3	15	5	4	3	2	6	5	0.6	2	13	5	9	1	4	18	5.975	5.15202	6.65	1.11297
ENSG00000197647	ZNF433	1	3	7	4	4	2	1	12	1	1	4	3	15	7	2	36	12	7.125	8.83836	0.029	0.00407018
ENSG00000203485	INF2	1	32	21	17	35	13	3	8	8	11	18	16	11	20	9	11	10	15.1875	8.63496	55	3.6214
ENSG00000204869	IGFL4	1	0.2	2	5	1	0.2	0.4	0.9	0.5	0.1	0.6	2	2	1	0.4	2	1	1.20625	1.22609	0	0
ENSG00000213799	ZNF845	1	5	12	3	6	4	2	5	17	1	4	10	10	7	1	8	10	6.5625	4.39649	0.183	0.0278857
ENSG00000213920	MDP1	1	1	2	1	1	1	0.5	1	2	0.5	0.8	2	2	2	0.4	1	3	1.325	0.73982	6.68	5.04151
ENSG00000214595	EML6	1	0.2	2	2	0.5	0.2	0.1	1	0.6	0.1	0.6	2	0.8	0.6	0.1	2	5	1.1125	1.2722	0.148	0.133034
ENSG00000215421	ZNF407	1	4	6	5	3	3	3	2	8	1	3	4	9	6	3	9	7	4.75	2.48998	0.094	0.0197895
ENSG00000240694	PNMA2	1	2	1	251	2	5	2	10	0.3	0.2	9	5	3	6	0.6	9	2	19.2563	61.883	1.01	0.0524505
ENSG00000241685	ARPC1A	1	59	79	76	73	60	59	62	57	46	86	91	91	120	33	80	79	71.9375	20.6639	27.7	0.385056
ENSG00000243364	EFNA4	1	3	7	2	5	5	0.8	9	14	4	13	10	19	9	0.8	9	10	7.5375	5.09416	0.183	0.0242786
ENSG00000000938	FGR	0.99	25	22	3	7	3	3	6	498	5	82	32	5	6	2	2	7	44.25	122.688	11.3	0.255367
ENSG00000013619	MAMLD1	0.99	5	5	10	3	3	0.7	2	0.3	0.8	15	5	33	4	2	17	3	6.8	8.52596	1.58	0.232353
ENSG00000019582	CD74	0.99	740	2729	259	718	175	196	670	3755	71	2871	1541	557	900	158	437	229	1000.38	1131.21	471	0.470823
ENSG00000023697	DERA	0.99	32	31	17	22	20	13	58	33	39	26	23	16	28	19	21	49	27.9375	12.2772	38.8	1.38881
ENSG00000037637	FBXO42	0.99	6	11	9	9	5	9	7	14	3	8	14	19	16	15	11	14	10.625	4.41022	0.592	0.0557176
ENSG00000038219	BOD1L1	0.99	15	23	20	9	11	6	10	32	3	7	12	22	17	4	18	21	14.375	8.02392	3.38	0.23513
ENSG00000042493	CAPG	0.99	19	42	13	34	7	1	56	135	1	81	31	31	39	10	20	58	36.125	34.4961	90	2.49135
ENSG00000046604	DSG2	0.99	87	8	0.8	42	31	31	51	0.1	9	23	6	35	47	1	13	78	28.9312	26.9102	12.7	0.438972
ENSG00000046653	GPM6B	0.99	12	8	1178	15	93	5	23	2	0.5	65	30	10	34	3	17	11	94.1562	290.089	2.89	0.0306937
ENSG00000061676	NCKAP1	0.99	30	30	60	32	46	29	34	2	8	35	23	44	63	37	38	72	36.4375	18.2901	13	0.356775
ENSG00000065615	CYB5R4	0.99	7	11	7	7	4	4	6	47	3	7	13	7	10	4	16	8	10.0625	10.4465	0.931	0.0925217
ENSG00000066827	ZFAT	0.99	2	5	2	8	2	2	4	7	1	3	4	4	3	5	7	5	4	2.06559	0.135	0.03375
ENSG00000068878	PSME4	0.99	19	32	17	25	10	34	14	33	15	26	21	29	24	59	68	59	30.3125	17.2886	6.71	0.221361
ENSG00000070269	TMEM260	0.99	3	7	5	6	4	1	9	9	3	5	10	17	14	1	8	10	7	4.4572	0.037	0.00528571
ENSG00000072133	RPS6KA6	0.99	0.7	2	5	0.9	3	0.4	12	0.4	0.6	2	1	6	5	0.3	6	17	3.89375	4.70807	1.7	0.436597
ENSG00000072840	EVC	0.99	4	4	2	7	5	2	18	0.4	0.6	9	4	25	12	0.8	8	11	7.05	6.80647	0.006	0.000851064
ENSG00000074054	CLASP1	0.99	27	19	35	19	16	19	17	23	7	14	21	32	29	26	30	27	22.5625	7.40242	25.6	1.13463
ENSG00000075884	ARHGAP15	0.99	3	28	1	3	3	1	1	48	1	11	19	2	4	0.4	6	2	8.3375	13.0357	28.2	3.38231
ENSG00000077522	ACTN2	0.99	0.3	0.6	31	54	0.4	685	0.3	0.1	0.1	8	4	1	6	1208	37	357	149.55	336.992	131	0.875961
ENSG00000079482	OPHN1	0.99	5	3	14	7	7	2	6	2	0.3	10	4	11	10	2	6	7	6.01875	3.81649	0.611	0.101516
ENSG00000080546	SESN1	0.99	33	26	43	25	34	26	21	32	7	36	52	42	46	81	56	72	39.5	18.942	0.355	0.00898734
ENSG00000091129	NRCAM	0.99	11	1	195	5	2	0.1	17	0.9	0.2	7	3	4	8	0.1	13	3	16.8938	47.7602	11.8	0.698483
ENSG00000092969	TGFB2	0.99	1	6	29	6	4	1	3	0.1	0.1	21	4	11	9	2	9	15	7.575	8.12785	0.662	0.0873927
ENSG00000099995	SF3A1	0.99	60	65	47	46	44	21	35	134	16	50	59	98	91	92	117	82	66.0625	33.5449	151	2.28571
ENSG00000100425	BRD1	0.99	10	21	10	12	9	6	9	26	5	15	23	28	21	7	52	21	17.1875	11.9176	1.08	0.0628364
ENSG00000100991	TRPC4AP	0.99	53	78	70	68	25	24	51	89	34	55	64	77	61	72	61	87	60.5625	19.7584	0.206	0.00340144
ENSG00000101608	MYL12A	0.99	295	486	54	310	202	606	201	540	93	529	317	273	157	285	220	450	313.625	165.084	566	1.8047
ENSG00000102780	DGKH	0.99	4	5	7	4	4	3	4	2	0.6	15	6	10	10	0.6	4	3	5.1375	3.78961	0.409	0.0796107
ENSG00000104047	DTWD1	0.99	4	7	6	6	6	2	4	3	1	5	7	16	12	1	7	6	5.8125	3.85087	1.32	0.227097
ENSG00000104833	TUBB4A	0.99	1	1	1078	0.6	8	1	3	2	0.8	0.5	5	3	4	4	55	1	72.9938	268.329	853	11.6859
ENSG00000105708	ZNF14	0.99	4	19	5	8	6	3	8	19	0.7	3	13	22	20	1	10	16	9.85625	7.30826	0.513	0.0520482
ENSG00000105722	ERF	0.99	18	39	40	17	16	9	13	23	8	47	26	67	28	3	42	33	26.8125	17.0302	3.1	0.115618
ENSG00000105793	GTPBP10	0.99	4	10	10	8	4	4	8	9	5	3	6	17	9	3	10	13	7.6875	3.91099	3.94	0.51252
ENSG00000106049	HIBADH	0.99	73	49	32	144	66	82	121	28	90	46	56	88	136	79	82	139	81.9375	36.926	93.2	1.13745
ENSG00000106799	TGFBR1	0.99	27	29	39	42	24	8	29	94	9	44	30	68	46	12	38	34	35.8125	21.6832	1.33	0.0371379
ENSG00000107372	ZFAND5	0.99	338	113	203	109	107	95	142	165	48	166	106	164	194	410	169	253	173.875	93.2894	4.94	0.0284112
ENSG00000110721	CHKA	0.99	14	15	28	19	7	2	17	5	8	11	15	22	25	2	100	44	20.875	23.6921	0.861	0.0412455
ENSG00000111077	TNS2	0.99	106	83	18	62	51	20	31	0.1	15	46	49	83	63	30	48	62	47.9438	28.4316	2.37	0.0494329
ENSG00000111261	MANSC1	0.99	22	23	17	14	13	4	12	10	5	9	16	21	22	3	16	14	13.8125	6.44173	3.18	0.230226
ENSG00000111348	ARHGDIB	0.99	152	606	33	125	52	44	83	2343	45	284	618	75	168	24	91	94	302.312	575.158	893	2.9539
ENSG00000112378	PERP	0.99	67	20	9	115	97	53	41	6	98	111	28	44	197	7	32	86	63.1875	51.7497	0.987	0.0156202
ENSG00000113068	PFDN1	0.99	44	75	81	51	47	36	42	67	15	55	48	61	84	36	69	65	54.75	18.4986	97.6	1.78265
ENSG00000113119	TMCO6	0.99	6	8	3	4	3	0.9	4	8	4	4	10	8	11	2	7	7	5.61875	2.92899	0.228	0.0405784
ENSG00000113595	TRIM23	0.99	10	13	59	16	17	9	12	17	6	12	13	22	32	16	29	25	19.25	12.8036	2.48	0.128831
ENSG00000114650	SCAP	0.99	19	25	17	19	16	7	21	34	24	13	24	45	26	18	30	27	22.8125	8.89358	0.661	0.0289753
ENSG00000115183	TANC1	0.99	8	30	7	12	8	15	12	0.2	2	25	9	19	16	1	9	16	11.825	8.23711	1.33	0.112474
ENSG00000116977	LGALS8	0.99	18	33	16	22	12	15	15	31	12	22	30	25	25	2	30	22	20.625	8.43702	6.58	0.31903
ENSG00000119401	TRIM32	0.99	8	13	8	11	8	7	10	17	2	8	14	29	20	28	21	15	13.6875	7.64826	2.43	0.177534
ENSG00000119699	TGFB3	0.99	8	48	18	12	14	7	8	0.9	3	76	31	16	28	32	38	18	22.3687	19.5244	0.772	0.0345124
ENSG00000121064	SCPEP1	0.99	57	64	19	87	54	37	64	167	10	90	86	85	119	9	38	195	73.8125	52.2203	26.2	0.354953
ENSG00000122218	COPA	0.99	107	100	108	94	55	40	77	175	62	77	68	146	111	95	90	165	98.125	37.8204	157	1.6
ENSG00000122417	ODF2L	0.99	4	16	9	11	4	2	9	6	1	13	14	18	10	0.6	7	13	8.6	5.39135	0.197	0.022907
ENSG00000122557	HERPUD2	0.99	34	37	26	25	21	10	22	89	16	36	48	53	48	19	41	35	35	18.9877	0.123	0.00351429
ENSG00000122696	SLC25A51	0.99	11	9	8	23	5	5	10	14	2	7	14	9	8	7	11	7	9.375	4.81491	0.07	0.00746667
ENSG00000123191	ATP7B	0.99	3	1	2	4	2	1	3	0.7	11	3	3	5	4	0.6	11	2	3.51875	3.18061	0.1	0.0284192
ENSG00000123360	PDE1B	0.99	23	11	18	7	4	1	2	1	0.3	4	6	9	6	0.6	3	3	6.18125	6.43493	4.59	0.742568
ENSG00000123636	BAZ2B	0.99	5	7	11	7	5	3	6	11	2	8	5	16	10	2	13	14	7.8125	4.29292	0.261	0.033408
ENSG00000123810	B9D2	0.99	4	9	3	4	4	1	7	14	1	7	4	6	7	0.9	10	7	5.55625	3.56707	0.192	0.0345557
ENSG00000124164	VAPB	0.99	12	25	55	25	21	16	28	14	13	9	16	33	31	26	24	50	24.875	12.9196	90.1	3.62211
ENSG00000124228	DDX27	0.99	18	34	12	14	17	4	16	26	6	19	25	46	31	15	35	42	22.5	12.3018	29	1.28889
ENSG00000124496	TRERF1	0.99	2	8	4	3	3	0.8	6	29	0.3	4	12	15	12	0.2	11	3	7.08125	7.46755	1.59	0.224537
ENSG00000128849	CGNL1	0.99	3	9	12	8	8	6	98	0.1	13	20	6	42	38	2	27	43	20.9438	25.005	1.17	0.0558639
ENSG00000129534	MIS18BP1	0.99	9	15	3	11	5	3	6	51	2	7	18	13	10	0.9	31	12	12.3063	12.7429	0.743	0.0603758
ENSG00000131127	ZNF141	0.99	3	10	5	3	3	2	5	7	2	6	11	16	9	0.4	5	9	6.025	4.10974	0.197	0.0326971
ENSG00000131748	STARD3	0.99	12	23	12	11	10	4	8	25	7	21	37	18	18	7	17	20	15.625	8.49215	0.745	0.04768
ENSG00000132376	INPP5K	0.99	33	24	15	36	12	9	13	38	6	22	24	14	23	19	30	62	23.75	13.9642	2.31	0.0972632
ENSG00000132530	XAF1	0.99	2	5	2	5	1	2	1	11	1	4	9	12	5	0.8	3	1	4.05	3.65331	1.91	0.471605
ENSG00000132669	RIN2	0.99	48	37	33	41	23	17	28	32	6	79	31	38	48	13	22	47	33.9375	17.2992	0.625	0.0184162
ENSG00000134744	ZCCHC11	0.99	5	14	6	6	4	4	6	13	2	7	11	19	9	9	11	14	8.75	4.61158	0.638	0.0729143
ENSG00000134758	RNF138	0.99	21	48	25	23	16	5	19	86	9	35	28	45	24	8	133	31	34.75	32.6813	2.19	0.0630216
ENSG00000135677	GNS	0.99	198	149	38	311	90	63	148	277	57	162	126	218	125	42	97	185	142.875	80.6539	22.8	0.15958
ENSG00000135763	URB2	0.99	3	8	4	5	2	3	5	10	2	3	5	14	4	11	11	6	6	3.68782	5.77	0.961667
ENSG00000136114	THSD1	0.99	4	27	3	10	2	3	1	0.1	2	12	9	4	7	2	7	6	6.19375	6.51772	0.133	0.0214733
ENSG00000136261	BZW2	0.99	34	41	20	36	32	147	23	33	12	42	19	26	62	67	25	81	43.75	33.2896	38.9	0.889143
ENSG00000139192	TAPBPL	0.99	8	20	5	22	7	3	13	27	10	24	18	16	20	1	8	23	14.0625	8.22572	0.792	0.05632
ENSG00000140090	SLC24A4	0.99	0.5	1	8	0.6	0.3	0.2	0.2	14	0.1	1	1	0.5	0.5	0.1	1	0.4	1.8375	3.75444	0	0
ENSG00000141431	ASXL3	0.99	0.4	0.5	3	0.2	0.9	0.4	1	0.1	0.3	0.2	0.8	6	2	0.2	5	3	1.5	1.83012	0.044	0.0293333
ENSG00000141644	MBD1	0.99	12	26	16	13	12	9	17	24	9	18	33	28	26	18	44	28	20.8125	9.66932	6.12	0.294054
ENSG00000145555	MYO10	0.99	12	7	19	6	8	3	18	0.5	3	21	8	18	7	14	18	34	12.2812	8.70626	0.322	0.0262188
ENSG00000146067	FAM193B	0.99	8	20	6	9	6	2	9	5	4	20	29	15	23	3	14	11	11.5	7.94984	0.262	0.0227826
ENSG00000147224	PRPS1	0.99	37	65	67	31	31	16	30	75	38	79	47	73	57	35	35	81	49.8125	20.926	63.1	1.26675
ENSG00000155090	KLF10	0.99	33	89	16	120	56	26	67	61	26	152	46	194	54	88	67	72	72.9375	47.9131	0.572	0.00784233
ENSG00000155506	LARP1	0.99	92	83	82	77	40	45	48	78	28	56	71	114	72	99	69	135	74.3125	27.7962	58.6	0.788562
ENSG00000155749	ALS2CR12	0.99	0.3	2	0.9	2	0.3	2	1	0.7	0.1	4	2	5	0.9	0.3	26	2	3.09375	6.25699	0.265	0.0856566
ENSG00000155849	ELMO1	0.99	18	22	48	9	8	4	3	40	5	18	27	8	11	3	8	31	16.4375	13.7984	60.4	3.67452
ENSG00000157077	ZFYVE9	0.99	16	13	50	21	15	11	18	2	6	14	14	56	28	22	43	47	23.5	16.5207	0.487	0.0207234
ENSG00000158636	EMSY	0.99	6	6	5	4	5	4	5	10	1	10	9	11	11	4	7	7	6.5625	2.92047	1.97	0.30019
ENSG00000158864	NDUFS2	0.99	51	67	80	60	32	104	107	63	93	53	53	90	62	72	46	100	70.8125	22.5513	81.5	1.15093
ENSG00000159164	SV2A	0.99	2	17	206	1	4	0.5	3	3	0.4	5	6	19	6	0.3	11	9	18.325	50.3664	4.14	0.225921
ENSG00000162236	STX5	0.99	45	41	25	36	25	9	36	73	20	60	52	63	63	22	52	57	42.4375	18.6582	15.8	0.372312
ENSG00000162512	SDC3	0.99	46	47	73	36	30	8	10	2	9	33	23	43	56	1	14	19	28.125	20.9821	0.69	0.0245333
ENSG00000162599	NFIA	0.99	54	41	36	87	38	26	13	3	17	19	30	87	75	18	54	66	41.5	26.5129	7.88	0.18988
ENSG00000162620	LRRIQ3	0.99	0.3	0.3	0.3	1	0.2	0.1	0.6	0.4	0.1	0.6	0.5	1	0.5	0.1	18	0.6	1.5375	4.39892	0.186	0.120976
ENSG00000162729	IGSF8	0.99	15	23	138	17	14	6	20	24	23	28	26	32	30	4	32	30	28.875	30.34	7.7	0.266667
ENSG00000163344	PMVK	0.99	36	73	94	78	64	25	76	54	55	38	53	111	91	18	78	101	65.3125	27.3196	82.9	1.26928
ENSG00000163362	INAVA	0.99	0.4	0.9	1	2	5	0.1	10	0.1	0.3	7	0.4	2	9	0.1	2	0.6	2.55625	3.31722	0.634	0.24802
ENSG00000163558	PRKCI	0.99	13	14	27	14	14	8	26	17	4	30	16	45	44	10	31	39	22	12.8737	5.48	0.249091
ENSG00000164609	SLU7	0.99	32	40	72	42	29	19	22	72	10	28	27	35	43	37	72	78	41.125	21.1436	2.3	0.0559271
ENSG00000165118	C9orf64	0.99	16	13	11	18	9	7	16	27	16	9	14	28	24	7	19	31	16.5625	7.5716	29.2	1.76302
ENSG00000165195	PIGA	0.99	8	10	23	9	3	3	12	10	4	33	10	11	13	4	10	15	11.125	7.71038	0.723	0.0649888
ENSG00000165801	ARHGEF40	0.99	18	7	6	29	7	3	7	18	7	14	11	34	21	5	14	12	13.3125	8.84473	0.747	0.0561127
ENSG00000165861	ZFYVE1	0.99	16	12	13	17	10	6	13	21	5	12	12	13	19	17	15	26	14.1875	5.26901	1.2	0.0845815
ENSG00000168036	CTNNB1	0.99	129	163	131	146	100	56	119	116	45	180	132	387	161	42	144	200	140.688	79.9131	45.4	0.322701
ENSG00000168096	ANKS3	0.99	2	6	3	2	2	0.7	3	0.8	0.3	3	5	8	7	0.8	4	5	3.2875	2.35142	0.176	0.0535361
ENSG00000168246	UBTD2	0.99	22	28	15	33	26	12	28	22	11	40	31	90	44	10	85	27	32.75	23.4961	0.998	0.0304733
ENSG00000168273	SMIM4	0.99	3	5	2	4	2	8	7	5	2	7	5	5	6	3	4	11	4.9375	2.46221	2.68	0.542785
ENSG00000168488	ATXN2L	0.99	27	44	22	15	19	7	17	45	8	46	55	47	34	19	97	33	33.4375	22.5654	71.5	2.13832
ENSG00000169683	LRRC45	0.99	2	5	2	4	2	1	3	5	3	4	7	5	5	0.9	4	3	3.49375	1.68344	0.164	0.046941
ENSG00000171574	ZNF584	0.99	5	8	11	5	3	4	3	4	3	6	3	14	8	5	6	13	6.3125	3.57246	0.152	0.0240792
ENSG00000172339	ALG14	0.99	2	6	5	5	2	0.8	4	2	4	1	2	5	3	0.6	4	7	3.3375	1.94555	0.508	0.15221
ENSG00000172432	GTPBP2	0.99	30	24	8	19	10	7	13	32	3	43	26	18	27	27	23	29	21.1875	10.7902	12.9	0.60885
ENSG00000173588	CEP83	0.99	3	5	4	3	4	3	3	2	2	5	3	11	5	2	14	7	4.75	3.35659	0.526	0.110737
ENSG00000173991	TCAP	0.99	0.6	2	2	153	3	905	1	1	0.6	2	14	2	2	530	30	383	126.95	259.909	1.25	0.0098464
ENSG00000175463	TBC1D10C	0.99	0.7	28	1	1	0.1	0.2	0.5	47	0.2	8	58	1	1	0.1	0.8	4	9.475	18.2685	1.75	0.184697
ENSG00000176095	IP6K1	0.99	25	36	47	22	21	8	27	49	10	23	33	42	38	10	37	34	28.875	12.8056	1.73	0.0599134
ENSG00000176244	ACBD7	0.99	1	1	122	2	0.4	0.8	1	0.8	0.4	4	2	3	2	0.4	6	2	9.3	30.0909	3	0.322581
ENSG00000176681	LRRC37A	0.99	0.5	1	0.3	0.8	0.5	0.2	0.7	0.6	0.2	0.6	0.9	0.9	0.9	0.5	0.8	0.7	0.63125	0.25224	0.088	0.139406
ENSG00000177000	MTHFR	0.99	5	19	6	5	3	7	12	14	4	10	8	34	8	3	8	20	10.375	8.1476	3.19	0.30747
ENSG00000178096	BOLA1	0.99	6	12	9	11	8	6	9	9	8	6	8	10	17	5	11	16	9.4375	3.40527	4.3	0.455629
ENSG00000179240	AP002360.1	0.99	0.3	2	2	0.6	0.5	0.3	0.7	0.5	0.1	0.6	0.9	2	1	0.1	2	0.6	0.8875	0.706045	0.005	0.0056338
ENSG00000182173	TSEN54	0.99	3	14	4	4	4	1	12	19	4	14	26	12	14	3	9	7	9.375	6.927	1.07	0.114133
ENSG00000182885	ADGRG3	0.99	8	3	0.4	0.2	3	0.4	0.5	31	0.5	19	5	0.7	3	0.6	1	8	5.26875	8.40854	0.066	0.0125267
ENSG00000185477	GPRIN3	0.99	4	10	5	3	3	5	5	18	0.6	12	22	4	2	0.9	2	3	6.21875	6.19895	0.615	0.0988945
ENSG00000187741	FANCA	0.99	0.4	1	1	0.6	0.3	0.2	0.2	2	0.4	0.6	1	0.5	0.2	0.1	6	0.4	0.93125	1.43281	0.367	0.394094
ENSG00000196305	IARS	0.99	32	64	45	41	26	21	51	33	20	24	28	100	53	91	45	113	49.1875	28.9441	177	3.59848
ENSG00000196449	YRDC	0.99	10	31	24	12	7	5	19	22	18	28	20	13	22	6	42	20	18.6875	9.91106	17.5	0.936455
ENSG00000197070	ARRDC1	0.99	8	15	4	8	4	3	7	21	5	12	23	9	15	4	9	11	9.875	6.03186	1.51	0.152911
ENSG00000197114	ZGPAT	0.99	2	11	1	3	1	0.9	2	4	0.8	2	7	4	2	0.7	3	4	3.025	2.70222	2.93	0.968595
ENSG00000197142	ACSL5	0.99	42	48	10	22	35	6	14	70	79	65	36	39	71	2	50	18	37.9375	24.6751	17.7	0.466557
ENSG00000197461	PDGFA	0.99	9	32	32	16	14	3	11	1	1	42	24	15	22	9	16	12	16.1875	11.6917	9.8	0.605405
ENSG00000197620	CXorf40A	0.99	3	8	5	4	3	3	4	6	2	3	6	6	6	2	5	6	4.5	1.75119	0.41	0.0911111
ENSG00000198712	MT-CO2	0.99	34645	25141	38143	27041	62457	50222	40199	10172	33645	10245	17335	14646	20428	42577	28543	19532	29685.7	14695.6	146	0.0049182
ENSG00000198721	ECI2	0.99	38	24	23	33	24	39	50	20	48	22	25	55	43	80	39	45	38	15.8409	34.6	0.910526
ENSG00000198722	UNC13B	0.99	14	13	15	25	15	11	34	0.5	16	35	14	30	26	4	25	24	18.8438	10.0195	0.96	0.0509453
ENSG00000198799	LRIG2	0.99	5	15	7	8	4	3	6	9	1	5	9	18	11	2	7	11	7.5625	4.58939	0.255	0.033719
ENSG00000198873	GRK5	0.99	20	18	5	12	24	7	4	21	3	76	23	30	19	5	10	17	18.375	17.4389	1.37	0.0745578
ENSG00000213366	GSTM2	0.99	2	5	7	14	3	4	4	1	0.7	10	5	37	19	5	8	10	8.41875	9.04243	47.4	5.63029
ENSG00000213593	TMX2	0.99	48	122	129	95	50	50	134	87	102	92	95	162	115	35	75	193	99	43.2235	6.1	0.0616162
ENSG00000214078	CPNE1	0.99	54	79	23	32	24	11	38	57	15	80	110	89	75	22	54	53	51	29.3984	155	3.03922
ENSG00000232119	MCTS1	0.99	18	25	24	27	19	11	24	31	26	19	29	23	28	11	24	21	22.5	5.78504	140	6.22222
ENSG00000242852	ZNF709	0.99	0.1	0.7	0.3	0.4	0.1	0.1	0.3	0.2	0.1	0.2	0.1	2	0.6	0.1	2	0.7	0.5	0.622896	0.114	0.228
ENSG00000244187	TMEM141	0.99	12	32	21	19	30	12	39	29	34	32	17	38	54	12	29	71	30.0625	15.8555	0.618	0.0205572
ENSG00000257335	MGAM	0.99	1	0.2	0.2	0.1	0.1	0.1	4	28	0.3	1	1	0.1	3	0.1	24	0.1	3.95625	8.70938	2.5	0.631912
ENSG00000263155	MYZAP	0.99	10	12	0.7	73	5	200	2	2	0.3	25	6	3	80	0.9	6	4	26.8687	52.395	1.6	0.0595487
ENSG00000269343	ZNF587B	0.99	5	23	2	8	2	3	8	6	5	1	8	12	6	2	10	15	7.25	5.73295	0.285	0.0393103
ENSG00000005175	RPAP3	0.98	8	19	20	11	12	7	13	35	5	12	19	40	25	12	28	26	18.25	10.2078	21.1	1.15616
ENSG00000013441	CLK1	0.98	37	93	32	59	65	22	51	51	14	150	185	88	160	58	59	71	74.6875	49.8888	1.25	0.0167364
ENSG00000014824	SLC30A9	0.98	23	32	82	27	19	32	46	24	12	27	16	49	38	15	30	70	33.875	19.5307	1.83	0.0540221
ENSG00000015171	ZMYND11	0.98	53	77	125	65	84	48	71	51	20	60	54	129	157	61	89	178	82.625	43.1213	1.57	0.0190015
ENSG00000015171	ZMYND11	0.98	53	77	125	65	84	48	71	51	20	60	54	129	157	61	89	178	82.625	43.1213	1.51	0.0182753
ENSG00000024048	UBR2	0.98	21	29	17	26	16	17	24	73	9	24	25	31	35	30	22	45	27.75	14.7264	3.96	0.142703
ENSG00000034693	PEX3	0.98	11	23	14	15	7	15	28	16	26	8	9	35	29	7	36	45	20.25	11.7785	4.14	0.204444
ENSG00000036257	CUL3	0.98	20	30	32	22	17	14	24	39	10	20	20	41	29	38	112	57	32.8125	24.2521	54.4	1.6579
ENSG00000042317	SPATA7	0.98	3	3	7	5	4	1	4	1	0.5	3	3	11	8	1	34	8	6.03125	8.03424	0.353	0.0585285
ENSG00000043143	JADE2	0.98	8	31	14	11	9	4	12	50	2	9	39	31	25	5	12	31	18.3125	14.2348	0.756	0.0412833
ENSG00000049540	ELN	0.98	34	20	5	35	17	4	11	0.1	2	26	20	23	17	2	43	20	17.4438	12.9472	33.9	1.94339
ENSG00000055917	PUM2	0.98	51	82	66	56	68	39	53	175	26	67	70	116	116	31	77	83	73.5	37.1627	6.75	0.0918367
ENSG00000056558	TRAF1	0.98	1	13	3	2	1	0.5	3	13	0.4	9	19	5	10	0.5	2	3	5.3375	5.697	36.7	6.87588
ENSG00000056586	RC3H2	0.98	25	23	29	22	16	15	16	35	7	27	23	27	23	16	23	25	22	6.69328	0.418	0.019
ENSG00000070761	CFAP20	0.98	10	26	43	24	11	13	16	26	12	25	29	36	29	4	44	24	23.25	11.6876	29	1.24731
ENSG00000073711	PPP2R3A	0.98	5	5	14	13	10	54	62	1	0.9	6	4	16	18	22	17	26	17.1187	17.6427	0.63	0.0368018
ENSG00000078124	ACER3	0.98	25	29	40	47	13	5	19	26	5	28	21	24	17	4	27	12	21.375	12.1099	1.84	0.0860819
ENSG00000078237	TIGAR	0.98	7	18	16	13	5	7	13	25	6	9	11	20	7	6	20	12	12.1875	6.09063	52	4.26667
ENSG00000079459	FDFT1	0.98	46	53	85	68	39	19	43	61	48	99	57	87	73	61	110	44	62.0625	23.954	29.3	0.472105
ENSG00000082516	GEMIN5	0.98	15	13	8	14	8	8	8	17	6	7	10	26	19	21	18	16	13.375	5.86373	22.3	1.66729
ENSG00000083544	TDRD3	0.98	10	12	11	14	8	8	10	11	3	11	12	27	17	8	21	16	12.4375	5.70343	1.17	0.0940704
ENSG00000089006	SNX5	0.98	25	54	27	37	20	9	38	39	17	31	40	66	38	19	36	121	38.5625	26.1278	25.1	0.650891
ENSG00000089009	RPL6	0.98	348	685	187	368	449	79	227	763	166	395	630	911	696	142	335	529	431.875	248.335	558	1.29204
ENSG00000092010	PSME1	0.98	132	320	67	111	131	57	202	505	88	270	229	254	246	78	139	167	187.25	116.414	709	3.78638
ENSG00000092036	HAUS4	0.98	12	17	9	18	16	5	10	32	2	18	18	30	28	6	14	16	15.6875	8.67732	91.6	5.83904
ENSG00000100033	PRODH	0.98	0.4	0.3	5	0.2	0.3	0.2	2	0.3	0.2	1	0.5	0.4	0.4	0.6	0.2	2	0.875	1.24553	1.43	1.63429
ENSG00000100564	PIGH	0.98	12	23	21	13	8	5	26	11	9	8	17	30	25	13	34	41	18.5	10.5135	0.125	0.00675676
ENSG00000100644	HIF1A	0.98	121	188	105	62	65	38	241	123	34	330	191	195	114	15	114	128	129	83.5225	0.888	0.00688372
ENSG00000100714	MTHFD1	0.98	30	18	21	43	11	11	20	11	64	12	14	28	20	45	12	30	24.375	15.1872	285	11.6923
ENSG00000101150	TPD52L2	0.98	51	54	33	58	44	19	37	82	12	50	62	58	84	29	49	54	48.5	19.6469	146	3.01031
ENSG00000101335	MYL9	0.98	358	759	37	414	1981	375	107	22	20	604	509	549	4048	144	918	232	692.312	1017	309	0.44633
ENSG00000101752	MIB1	0.98	24	19	34	23	21	9	22	35	8	33	21	42	33	10	34	36	25.25	10.4913	1.16	0.0459406
ENSG00000102316	MAGED2	0.98	61	90	96	76	57	34	129	59	19	144	87	251	195	28	121	146	99.5625	62.8065	50.1	0.503202
ENSG00000106829	TLE4	0.98	8	14	28	7	7	3	7	48	1	19	15	29	18	8	84	15	19.4375	20.906	1.62	0.0833441
ENSG00000107331	ABCA2	0.98	5	8	118	13	5	4	5	9	3	5	8	7	8	6	7	12	13.9375	27.8818	0.571	0.0409686
ENSG00000108091	CCDC6	0.98	29	50	52	46	39	15	33	39	10	32	42	77	68	19	55	68	42.125	19.28	41.5	0.985163
ENSG00000110046	ATG2A	0.98	9	11	8	6	3	3	6	14	7	9	7	12	7	11	7	18	8.625	3.89658	0.867	0.100522
ENSG00000110400	NECTIN1	0.98	3	4	27	9	3	5	5	8	3	5	4	9	9	0.4	2	2	6.15	6.18061	6.42	1.0439
ENSG00000110448	CD5	0.98	0.5	25	0.6	1	0.4	0.1	0.4	114	0.4	13	43	1	2	0.1	2	0.9	12.775	29.4841	1.17	0.0915851
ENSG00000110455	ACCS	0.98	2	10	0.5	7	0.8	0.9	3	0.7	2	4	2	7	6	0.4	3	7	3.51875	2.98043	0.306	0.0869627
ENSG00000110911	SLC11A2	0.98	10	20	34	12	6	5	17	8	9	26	15	20	20	6	14	66	18	15.0555	0.471	0.0261667
ENSG00000111711	GOLT1B	0.98	32	45	41	52	26	15	48	30	21	62	37	50	39	12	42	47	37.4375	13.9187	14.5	0.387312
ENSG00000112312	GMNN	0.98	7	8	11	11	15	3	16	9	6	9	14	11	28	3	45	23	13.6875	10.6753	10.7	0.781735
ENSG00000112365	ZBTB24	0.98	6	20	10	7	4	2	7	25	2	5	12	13	12	6	13	20	10.25	6.77741	0.185	0.0180488
ENSG00000112655	PTK7	0.98	2	4	1	5	2	0.3	7	0.9	0.3	17	3	53	13	0.1	14	14	8.5375	13.1701	12.7	1.48755
ENSG00000112769	LAMA4	0.98	84	46	5	107	37	12	3	0.5	0.9	52	22	45	60	2	32	15	32.7125	31.742	17.2	0.525793
ENSG00000114331	ACAP2	0.98	28	24	21	23	13	6	14	100	6	22	27	41	26	5	22	25	25.1875	22.0914	14.5	0.575682
ENSG00000114395	CYB561D2	0.98	5	17	5	9	2	2	12	32	14	6	7	7	9	4	5	18	9.625	7.70173	1.65	0.171429
ENSG00000114904	NEK4	0.98	8	8	14	9	6	5	11	20	5	9	10	28	15	14	42	19	13.9375	9.71232	0.793	0.0568969
ENSG00000115758	ODC1	0.98	42	112	35	70	64	21	110	117	63	71	66	241	107	115	203	165	100.125	60.5055	0.073	0.000729089
ENSG00000117114	ADGRL2	0.98	28	41	16	27	28	23	28	0.1	24	222	33	51	28	3	21	83	41.0063	51.8432	0.88	0.0214601
ENSG00000118898	PPL	0.98	61	9	12	26	18	3	11	0.4	6	22	11	22	33	12	21	46	19.5875	16.0259	11.4	0.582004
ENSG00000119508	NR4A3	0.98	8	2	3	8	11	29	2	0.6	0.3	116	10	127	61	5	9	16	25.4937	40.3952	0.429	0.0168277
ENSG00000119661	DNAL1	0.98	6	9	23	13	4	3	13	5	2	12	4	21	7	2	19	18	10.0625	7.1037	1.44	0.143106
ENSG00000119682	AREL1	0.98	9	19	16	9	4	7	18	52	7	10	18	22	10	12	32	28	17.0625	12.1736	0.047	0.00275458
ENSG00000121350	PYROXD1	0.98	6	13	8	9	6	6	13	13	6	7	5	15	13	7	17	19	10.1875	4.49027	1.25	0.122699
ENSG00000122966	CIT	0.98	1	1	28	0.7	1	0.3	5	0.4	0.5	2	2	0.7	0.9	0.1	6	4	3.35	6.80559	1.45	0.432836
ENSG00000123130	ACOT9	0.98	19	32	14	23	14	16	13	28	5	33	21	29	26	15	18	34	21.25	8.43406	59.3	2.79059
ENSG00000123136	DDX39A	0.98	21	76	11	16	11	6	20	30	7	22	61	31	20	12	111	34	30.5625	28.6844	241	7.88548
ENSG00000123219	CENPK	0.98	0.3	3	0.7	1	0.6	0.4	0.6	3	0.3	1	3	1	0.6	0.1	9	0.5	1.56875	2.21802	0.712	0.453865
ENSG00000123612	ACVR1C	0.98	35	0.4	10	40	1	0.2	0.5	1	1	0.1	3	0.4	0.8	0.8	2	1	6.075	12.5257	0.225	0.037037
ENSG00000124588	NQO2	0.98	11	7	11	20	4	4	14	15	12	6	8	10	7	11	7	16	10.1875	4.49027	26.9	2.64049
ENSG00000127054	INTS11	0.98	14	25	12	13	11	6	11	13	6	12	25	30	23	24	31	24	17.5	8.27849	7.91	0.452
ENSG00000130024	PHF10	0.98	48	42	58	52	52	34	35	36	17	59	70	101	78	43	63	68	53.5	20.1957	2.2	0.0411215
ENSG00000130584	ZBTB46	0.98	9	13	3	8	2	4	8	2	3	7	7	27	5	0.9	7	11	7.30625	6.26477	0.347	0.0474936
ENSG00000131473	ACLY	0.98	92	95	78	129	47	13	66	111	26	67	81	95	72	18	106	67	72.6875	33.3841	363	4.99398
ENSG00000131849	ZNF132	0.98	1	3	4	4	2	4	6	4	0.6	2	3	13	14	3	7	11	5.1	4.12472	0.093	0.0182353
ENSG00000132153	DHX30	0.98	14	27	24	13	11	8	15	16	8	14	22	27	25	17	57	27	20.3125	11.8306	23.5	1.15692
ENSG00000132819	RBM38	0.98	10	54	8	17	40	23	9	86	3	34	37	64	52	127	44	44	40.75	32.3944	2.26	0.0554601
ENSG00000133226	SRRM1	0.98	32	49	37	36	16	11	23	48	12	46	37	66	39	17	49	55	35.8125	16.3308	85	2.37347
ENSG00000134759	ELP2	0.98	18	29	20	23	16	9	13	18	10	16	17	50	34	17	27	28	21.5625	10.289	10.8	0.50087
ENSG00000134982	APC	0.98	9	13	74	12	7	9	10	22	3	5	12	17	15	12	14	14	15.5	16.2645	1.05	0.0677419
ENSG00000135452	TSPAN31	0.98	18	22	17	21	13	7	16	13	7	25	14	39	26	7	17	39	18.8125	9.81304	0.673	0.0357741
ENSG00000136213	CHST12	0.98	3	9	4	3	2	1	3	6	0.7	4	8	3	4	1	4	4	3.73125	2.31998	1.42	0.38057
ENSG00000136425	CIB2	0.98	6	7	4	9	8	3	4	2	0.2	3	8	11	17	1	22	8	7.075	5.8089	0.221	0.0312367
ENSG00000137460	FHDC1	0.98	1	8	2	1	1	0.1	3	0.4	0.1	6	4	2	2	0.1	3	39	4.54375	9.45114	0.569	0.125227
ENSG00000137478	FCHSD2	0.98	56	67	26	22	23	15	17	56	8	54	59	57	36	10	59	25	36.875	20.6878	0.969	0.026278
ENSG00000138381	ASNSD1	0.98	53	70	63	50	57	28	48	75	33	56	85	115	79	63	78	120	67.0625	25.2335	0.164	0.00244548
ENSG00000138629	UBL7	0.98	36	46	51	33	30	19	31	71	14	22	45	43	45	69	59	45	41.1875	16.469	6.25	0.151745
ENSG00000140006	WDR89	0.98	7	21	15	10	9	3	17	33	7	9	17	35	25	7	18	23	16	9.5149	1.84	0.115
ENSG00000140263	SORD	0.98	2	4	8	3	4	2	15	9	51	4	3	5	34	1	7	167	19.9375	41.4769	102	5.11599
ENSG00000140750	ARHGAP17	0.98	22	31	7	18	9	8	9	31	3	20	24	19	13	11	18	16	16.1875	8.28025	97.5	6.02317
ENSG00000140876	NUDT7	0.98	5	6	5	16	4	13	9	4	10	4	6	5	12	1	10	10	7.5	4.04969	0.076	0.0101333
ENSG00000141664	ZCCHC2	0.98	7	9	9	9	6	3	7	21	6	11	13	13	13	16	23	14	11.25	5.45894	0.189	0.0168
ENSG00000142856	ITGB3BP	0.98	2	8	4	5	5	1	7	5	0.6	6	7	19	7	1	16	6	6.225	5.01564	0.47	0.075502
ENSG00000143179	UCK2	0.98	12	18	10	12	7	2	6	7	5	13	8	13	8	6	10	14	9.4375	4.06561	35.6	3.77219
ENSG00000143434	SEMA6C	0.98	3	8	4	8	3	14	2	0.6	0.4	2	10	9	7	24	12	9	7.25	6.09109	0.421	0.058069
ENSG00000144028	SNRNP200	0.98	48	75	40	36	27	20	35	90	17	38	57	108	73	56	73	84	54.8125	26.7138	94.2	1.71859
ENSG00000144655	CSRNP1	0.98	38	50	26	52	20	14	34	49	40	176	61	80	83	41	29	32	51.5625	38.3579	0.975	0.0189091
ENSG00000144895	EIF2A	0.98	72	90	63	53	80	41	51	117	41	66	81	108	156	97	71	114	81.3125	31.2937	66.2	0.814143
ENSG00000145428	RNF175	0.98	0.7	2	10	0.5	0.5	0.6	0.8	9	0.5	2	2	0.7	3	0.1	1	0.7	2.13125	2.98389	0.057	0.0267449
ENSG00000145703	IQGAP2	0.98	6	9	0.7	10	9	3	28	118	65	7	17	14	16	0.9	56	40	24.975	31.3978	84.4	3.37938
ENSG00000146414	SHPRH	0.98	3	3	3	2	1	2	3	5	0.6	1	3	6	4	1	4	4	2.85	1.53623	0.126	0.0442105
ENSG00000146701	MDH2	0.98	76	88	90	74	63	144	86	86	148	58	58	91	119	302	77	159	107.438	60.7706	1122	10.4433
ENSG00000146776	ATXN7L1	0.98	2	6	3	3	2	0.8	3	13	1	2	5	7	6	0.6	10	9	4.5875	3.65402	0.775	0.168937
ENSG00000146842	TMEM209	0.98	14	23	19	20	6	5	11	26	10	5	11	30	17	9	24	30	16.25	8.6062	3.99	0.245538
ENSG00000148200	NR6A1	0.98	0.4	1	1	1	0.9	0.5	2	2	1	3	1	1	1	0.6	44	7	4.2125	10.729	0.117	0.0277745
ENSG00000148337	CIZ1	0.98	38	42	29	34	34	11	18	31	5	26	49	70	72	38	60	39	37.25	18.8273	3.5	0.0939597
ENSG00000148339	SLC25A25	0.98	9	21	23	15	7	2	16	9	23	32	13	27	22	9	9	20	16.0625	8.30637	1.11	0.0691051
ENSG00000149346	SLX4IP	0.98	2	5	3	5	3	1	7	8	2	2	6	9	7	0.4	6	6	4.525	2.64008	0.171	0.0377901
ENSG00000152484	USP12	0.98	33	41	51	38	84	16	35	41	14	66	32	37	84	14	58	53	43.5625	21.664	0.185	0.00424677
ENSG00000152520	PAN3	0.98	32	60	12	35	13	6	20	59	3	31	37	37	36	6	32	41	28.75	17.51	16.4	0.570435
ENSG00000153563	CD8A	0.98	0.6	46	2	2	1	0.6	0.8	180	2	18	70	5	4	0.1	2	3	21.0688	46.6948	1.33	0.0631267
ENSG00000153936	HS2ST1	0.98	14	20	32	17	15	7	15	25	9	20	16	39	25	7	26	26	19.5625	8.92165	8.48	0.433482
ENSG00000154127	UBASH3B	0.98	2	9	5	1	0.6	0.6	2	26	0.9	6	5	2	1	0.1	2	5	4.2625	6.30787	28.8	6.7566
ENSG00000154146	NRGN	0.98	11	17	988	8	8	3	6	413	1	76	26	14	13	4	18	15	101.312	256.963	102	1.00679
ENSG00000154237	LRRK1	0.98	7	17	17	7	4	2	5	7	2	4	16	17	7	2	11	5	8.125	5.64358	0.793	0.0976
ENSG00000154727	GABPA	0.98	30	41	16	35	28	14	26	60	12	26	36	50	45	14	52	50	33.4375	15.2095	4.62	0.138168
ENSG00000154957	ZNF18	0.98	6	15	9	8	3	2	6	16	4	4	8	15	9	5	19	9	8.625	5.09738	0.554	0.0642319
ENSG00000155034	FBXL18	0.98	2	3	3	3	0.9	0.8	2	3	0.9	1	2	2	1	1	2	2	1.85	0.83666	1.84	0.994595
ENSG00000155957	TMBIM4	0.98	39	67	21	45	25	14	43	75	26	40	53	61	44	9	51	48	41.3125	18.6037	0.114	0.00275946
ENSG00000155959	VBP1	0.98	33	61	149	61	62	52	65	91	31	78	67	97	92	46	64	100	71.8125	29.3172	92.3	1.28529
ENSG00000156011	PSD3	0.98	2	4	92	3	2	13	3	0.5	4	5	4	27	5	0.2	13	6	11.4812	22.4829	0.685	0.0596625
ENSG00000159140	SON	0.98	65	92	65	61	47	28	47	142	23	64	73	141	78	44	79	115	72.75	35.2524	27.5	0.378007
ENSG00000159714	ZDHHC1	0.98	9	7	3	8	4	1	6	1	0.7	13	3	17	9	3	15	23	7.66875	6.46805	0.287	0.0374246
ENSG00000160191	PDE9A	0.98	7	7	4	7	29	1	12	1	0.4	7	6	8	24	0.3	5	5	7.73125	8.03697	0.212	0.0274212
ENSG00000160908	ZNF394	0.98	13	30	7	12	13	5	8	25	4	21	17	17	23	8	18	19	15	7.56307	0.34	0.0226667
ENSG00000162104	ADCY9	0.98	10	7	7	7	10	13	9	7	9	18	10	24	18	45	11	49	15.875	13.0786	0.268	0.0168819
ENSG00000162542	TMCO4	0.98	8	17	1	13	5	2	15	11	3	6	13	18	23	2	10	26	10.8125	7.63517	0.782	0.0723237
ENSG00000162885	B3GALNT2	0.98	6	9	5	7	6	5	4	4	2	5	6	11	11	7	11	12	6.9375	2.99931	0.138	0.0198919
ENSG00000163328	GPR155	0.98	6	7	31	7	18	8	10	19	4	7	10	7	13	3	8	6	10.25	7.0946	0.045	0.00439024
ENSG00000163564	PYHIN1	0.98	1	8	0.5	1	0.5	0.2	0.4	60	0.4	10	26	1	3	0.2	0.5	0.8	7.09375	15.5963	3.76	0.530044
ENSG00000163632	C3orf49	0.98	0.2	3	8	0.9	0.6	0.3	0.5	1	0.2	0.4	0.3	3	0.2	0.1	2	2	1.41875	2.01137	0.054	0.0380617
ENSG00000163682	RPL9	0.98	300	815	286	368	567	94	347	1364	211	1076	959	1430	1502	186	457	582	659	471.821	401	0.608498
ENSG00000163902	RPN1	0.98	183	177	82	125	115	48	208	235	230	292	189	216	142	85	180	211	169.875	65.4807	236	1.38926
ENSG00000164164	OTUD4	0.98	18	28	16	20	17	14	19	41	9	37	25	38	24	37	49	38	26.875	11.6726	2.9	0.107907
ENSG00000164309	CMYA5	0.98	0.9	0.5	3	33	2	453	4	0.2	1	0.8	2	33	7	1315	19	354	139.275	341.761	0.012	8.61605e-05
ENSG00000165140	FBP1	0.98	14	14	4	24	11	1	76	74	582	109	26	8	151	0.2	6	30	70.6375	143.203	48.1	0.680941
ENSG00000165185	KIAA1958	0.98	1	1	7	2	1	1	7	3	2	3	3	9	4	1	10	3	3.625	2.98608	0.27	0.0744828
ENSG00000167625	ZNF526	0.98	5	7	3	4	4	1	3	10	2	5	5	11	9	6	10	5	5.625	3.00832	0.118	0.0209778
ENSG00000169313	P2RY12	0.98	3	5	16	28	5	1	1	21	1	2	5	1	5	0.6	2	1	6.1	8.19756	0.03	0.00491803
ENSG00000169403	PTAFR	0.98	12	11	3	9	3	1	3	224	2	8	10	7	4	0.2	3	3	18.95	54.806	0.031	0.00163588
ENSG00000169635	HIC2	0.98	3	3	1	2	1	0.6	2	4	0.8	2	3	7	1	0.4	13	2	2.8625	3.16288	0.925	0.323144
ENSG00000170989	S1PR1	0.98	412	189	84	112	179	62	39	281	18	393	152	31	79	36	41	103	138.188	125.051	0.363	0.00262687
ENSG00000172159	FRMD3	0.98	26	8	8	11	10	21	21	7	0.3	5	5	5	14	6	11	48	12.8938	11.6279	0.073	0.00566166
ENSG00000172687	ZNF738	0.98	1	8	11	4	2	0.7	4	3	0.5	2	6	6	4	0.1	6	5	3.95625	2.99243	0.03	0.00758294
ENSG00000173226	IQCB1	0.98	12	23	22	13	9	6	12	18	3	29	24	38	34	6	59	13	20.0625	14.5669	3.55	0.176947
ENSG00000173369	C1QB	0.98	267	355	81	88	31	57	65	2	110	355	438	75	194	24	95	65	143.875	135.625	609	4.23284
ENSG00000173638	SLC19A1	0.98	1	2	2	3	0.5	0.3	1	9	2	3	2	3	1	0.3	2	4	2.25625	2.09729	31.8	14.0942
ENSG00000174307	PHLDA3	0.98	56	20	26	55	29	5	8	0.8	0.4	27	16	24	67	22	17	27	25.0125	19.5103	1.07	0.0427786
ENSG00000177432	NAP1L5	0.98	10	15	209	11	15	4	10	2	4	11	10	42	35	2	22	36	27.375	49.9945	2.21	0.0807306
ENSG00000177548	RABEP2	0.98	3	21	3	5	3	2	7	4	2	3	14	8	7	0.5	5	7	5.90625	5.16468	12.1	2.04868
ENSG00000177663	IL17RA	0.98	16	16	8	10	4	4	8	187	5	10	23	10	5	0.9	7	10	20.2437	44.8054	0.207	0.0102254
ENSG00000177683	THAP5	0.98	17	22	37	19	14	12	23	41	13	22	25	52	26	18	46	42	26.8125	12.6818	0.086	0.00320746
ENSG00000178127	NDUFV2	0.98	8	24	24	18	14	19	21	8	22	16	10	9	11	19	20	20	16.4375	5.66826	68.7	4.17947
ENSG00000179364	PACS2	0.98	12	11	26	14	8	5	7	6	2	6	9	17	12	18	17	10	11.25	6.07179	1.8	0.16
ENSG00000179630	LACC1	0.98	8	16	26	9	5	5	8	6	5	4	6	13	13	2	22	9	9.8125	6.68549	0.509	0.0518726
ENSG00000179915	NRXN1	0.98	0.6	0.3	60	0.3	10	1	0.2	0.1	0.1	0.5	0.8	0.7	4	0.1	3	0.2	5.11875	14.8522	0.737	0.14398
ENSG00000179941	BBS10	0.98	20	14	17	20	17	9	18	22	6	13	18	34	33	12	22	18	18.3125	7.40917	0.155	0.00846416
ENSG00000182511	FES	0.98	15	19	4	8	6	2	5	32	4	16	13	12	14	1	7	12	10.625	7.8475	2.64	0.248471
ENSG00000182551	ADI1	0.98	25	47	31	58	32	45	78	44	144	33	44	42	76	24	44	51	51.125	29.2367	65.2	1.27531
ENSG00000183011	NAA38	0.98	13	25	19	17	13	8	17	17	8	17	14	14	20	8	42	22	17.125	8.2452	1.35	0.0788321
ENSG00000184271	POU6F1	0.98	8	20	26	8	8	2	5	4	0.8	11	15	29	18	11	7	11	11.4875	8.18225	0.038	0.00330794
ENSG00000185085	INTS5	0.98	15	21	7	12	6	5	13	30	8	9	15	28	14	13	14	18	14.25	7.20648	6.96	0.488421
ENSG00000186230	ZNF749	0.98	2	6	3	3	1	2	4	3	0.5	2	4	8	2	0.9	3	4	3.025	1.92614	0.115	0.0380165
ENSG00000186871	ERCC6L	0.98	0.4	1	0.4	0.3	0.4	0.1	0.1	0.3	0.1	0.1	2	0.6	0.3	0.1	3	0.6	0.6125	0.796555	4.21	6.87347
ENSG00000196182	STK40	0.98	29	31	11	48	24	20	20	85	12	52	35	63	46	113	43	47	42.4375	27.0776	0.298	0.00702209
ENSG00000196284	SUPT3H	0.98	2	3	3	4	5	0.6	4	4	0.7	3	5	13	12	1	16	6	5.14375	4.5645	0.43	0.0835966
ENSG00000197619	ZNF615	0.98	5	9	11	8	7	5	8	13	2	8	8	20	23	4	8	16	9.6875	5.73549	0.063	0.00650323
ENSG00000198093	ZNF649	0.98	6	11	8	5	6	4	7	7	2	7	5	23	17	2	10	13	8.3125	5.53436	0.315	0.0378947
ENSG00000198108	CHSY3	0.98	6	3	5	4	3	0.5	1	0.3	4	3	3	3	2	0.5	5	3	2.89375	1.70508	0.129	0.0445788
ENSG00000198523	PLN	0.98	34	262	8	54	417	3956	44	0.5	2	132	151	50	337	377	164	141	383.094	962.482	2.06	0.00537727
ENSG00000198856	OSTC	0.98	71	143	24	101	107	25	147	140	172	121	155	166	130	11	129	97	108.688	51.2637	49.3	0.453594
ENSG00000204228	HSD17B8	0.98	8	20	11	21	11	7	26	13	24	18	4	12	23	7	12	40	16.0625	9.29135	19.4	1.20778
ENSG00000204356	NELFE	0.98	41	58	39	38	27	12	33	39	10	52	33	70	56	27	104	57	43.5	23.0072	35.6	0.818391
ENSG00000230989	HSBP1	0.98	17	29	38	18	26	17	41	37	12	41	33	52	39	11	53	52	32.25	14.2478	25.1	0.778295
ENSG00000231925	TAPBP	0.98	85	120	29	65	35	24	41	193	35	125	106	62	75	33	25	57	69.375	46.8571	429	6.18378
ENSG00000235169	SMIM1	0.98	0.4	1	0.4	0.9	0.9	1	1	3	1	2	0.6	4	6	0.2	7	2	1.9625	2.04479	13	6.6242
ENSG00000240857	RDH14	0.98	27	49	37	31	35	35	39	30	20	40	42	42	61	30	59	54	39.4375	11.5237	10.7	0.271315
ENSG00000244734	HBB	0.98	657	435	234	1412	3725	72	13	17	31	23087	265	97	628	29	1337	5	2002.75	5701.74	4758	2.37573
ENSG00000246705	H2AFJ	0.98	64	36	12	56	27	7	15	12	8	44	32	20	51	9	91	45	33.0625	24.1398	414	12.5217
ENSG00000005889	ZFX	0.97	21	23	15	30	14	8	16	25	5	11	34	55	26	22	18	34	22.3125	12.2132	0.457	0.0204818
ENSG00000006576	PHTF2	0.97	7	17	10	13	5	11	8	17	2	11	16	16	13	36	19	25	14.125	8.17211	0.084	0.0059469
ENSG00000006712	PAF1	0.97	50	64	65	49	40	19	37	54	24	57	55	97	75	34	116	87	57.6875	26.1883	11.4	0.197616
ENSG00000007168	PAFAH1B1	0.97	52	74	191	70	51	48	58	105	17	55	55	112	78	69	107	154	81	43.7965	91.3	1.12716
ENSG00000023572	GLRX2	0.97	15	11	29	34	23	18	25	16	23	14	21	16	25	16	72	29	24.1875	14.2465	0.86	0.0355556
ENSG00000050555	LAMC3	0.97	0.6	2	2	0.5	0.5	0.2	8	0.3	1	17	0.7	2	14	0.1	70	2	7.55625	17.424	0.428	0.0566419
ENSG00000056097	ZFR	0.97	49	57	120	60	60	30	56	79	19	56	59	114	90	51	91	88	67.4375	27.6429	25.9	0.384059
ENSG00000057294	PKP2	0.97	18	4	3	3	5	197	6	0.9	11	2	4	27	6	4	12	2	19.0562	47.9504	13.2	0.692686
ENSG00000058272	PPP1R12A	0.97	26	42	21	25	43	9	14	50	3	40	34	43	126	12	46	36	35.625	28.1327	47.8	1.34175
ENSG00000061337	LZTS1	0.97	3	16	13	4	0.9	2	2	0.3	0.3	6	3	8	3	0.7	8	2	4.5125	4.61647	0.509	0.112798
ENSG00000063601	MTMR1	0.97	6	25	14	9	6	5	9	30	5	10	15	14	13	12	12	18	12.6875	6.98302	5.34	0.420887
ENSG00000065054	SLC9A3R2	0.97	50	66	17	62	23	37	36	0.7	55	62	39	42	29	11	34	54	38.6063	19.191	11.2	0.290108
ENSG00000066583	ISOC1	0.97	71	34	23	71	36	62	53	36	88	28	36	128	57	10	42	32	50.4375	29.0447	100	1.98265
ENSG00000070018	LRP6	0.97	12	13	16	20	19	7	22	1	13	26	12	30	23	5	21	29	16.8125	8.43183	0.117	0.00695911
ENSG00000072803	FBXW11	0.97	36	38	135	42	34	39	35	52	17	69	38	76	54	38	52	60	50.9375	26.7768	1.49	0.0292515
ENSG00000075624	ACTB	0.97	4968	5975	2718	3375	5213	390	1794	10423	1216	6604	3184	5795	8082	601	3170	2401	4119.31	2794.64	4806	1.1667
ENSG00000078804	TP53INP2	0.97	45	42	115	26	25	67	64	12	21	43	18	29	74	13	40	80	44.625	28.6144	0.118	0.00264426
ENSG00000079112	CDH17	0.97	0.6	0.9	0.6	0.3	20	0.2	0.7	0.1	0.1	0.3	0.7	0.5	1	0.1	0.9	1	1.75	4.87729	4.82	2.75429
ENSG00000083799	CYLD	0.97	12	35	29	12	8	9	9	95	5	26	31	20	18	16	25	32	23.875	21.2536	3.43	0.143665
ENSG00000087338	GMCL1	0.97	19	9	11	16	11	5	16	43	8	13	18	20	27	3	39	18	17.25	11.1026	0.009	0.000521739
ENSG00000091262	ABCC6	0.97	0.4	1	0.6	13	0.4	0.2	5	1	21	2	0.6	0.9	0.5	0.4	1	2	3.125	5.72742	0.326	0.10432
ENSG00000094631	HDAC6	0.97	7	10	9	9	4	3	14	9	9	9	11	16	10	9	15	12	9.75	3.47371	5.55	0.569231
ENSG00000094804	CDC6	0.97	0.5	2	0.6	1	0.9	0.4	2	1	0.4	0.8	3	2	1	0.4	16	1	2.0625	3.79014	0.178	0.086303
ENSG00000100151	PICK1	0.97	7	13	20	7	3	4	8	4	4	6	8	13	9	6	17	14	8.9375	5.03943	2.31	0.258462
ENSG00000100503	NIN	0.97	13	24	15	12	9	7	10	82	2	11	22	17	14	8	9	10	16.5625	18.2901	0.453	0.0273509
ENSG00000101407	TTI1	0.97	10	13	12	10	7	5	12	22	7	7	12	23	17	14	24	23	13.625	6.35479	5.38	0.394862
ENSG00000101605	MYOM1	0.97	7	18	10	59	19	388	2	2	11	3	8	7	29	423	46	108	71.25	133.525	3.74	0.0524912
ENSG00000102575	ACP5	0.97	10	25	1	21	4	1	15	23	18	62	49	42	15	2	5	4	18.5625	18.3084	2.63	0.141684
ENSG00000102858	MGRN1	0.97	18	16	16	12	6	4	10	21	7	15	14	25	14	15	13	23	14.3125	5.82774	0.77	0.0537991
ENSG00000103126	AXIN1	0.97	5	9	2	5	6	2	3	15	2	7	10	10	8	6	7	10	6.6875	3.60959	0.483	0.0722243
ENSG00000105323	HNRNPUL1	0.97	134	133	61	88	87	36	43	162	26	92	89	163	133	73	140	157	101.062	45.8599	94.6	0.936054
ENSG00000106392	C1GALT1	0.97	8	17	19	13	5	7	21	38	7	16	18	13	11	7	10	11	13.8125	8.07646	0.422	0.030552
ENSG00000106560	GIMAP2	0.97	12	37	2	17	10	4	10	265	7	40	84	22	16	0.9	12	7	34.1187	64.9412	0.225	0.00659461
ENSG00000106804	C5	0.97	2	4	5	2	3	0.6	3	2	335	5	4	8	5	0.1	5	4	24.2312	82.8947	217	8.95538
ENSG00000107281	NPDC1	0.97	43	55	29	30	28	9	12	4	4	38	44	29	58	4	22	15	26.5	17.7576	1.69	0.0637736
ENSG00000107789	MINPP1	0.97	13	14	11	15	12	4	28	23	28	22	20	22	26	3	21	16	17.375	7.69307	14.8	0.851799
ENSG00000108055	SMC3	0.97	60	78	44	41	51	19	37	81	13	35	47	127	61	32	230	96	65.75	52.6732	88.6	1.34753
ENSG00000108924	HLF	0.97	7	11	94	24	21	12	12	0.6	28	15	4	37	47	5	21	24	22.6625	22.7141	0.288	0.0127082
ENSG00000109436	TBC1D9	0.97	35	42	38	70	16	8	40	65	5	36	47	44	37	2	22	14	32.5625	20.0532	0.547	0.0167985
ENSG00000110013	SIAE	0.97	6	13	25	16	9	19	26	5	13	8	15	11	17	7	12	55	16.0625	12.0746	153	9.52529
ENSG00000112514	CUTA	0.97	62	143	127	110	92	26	85	110	41	88	117	166	139	35	116	160	101.062	43.082	138	1.36549
ENSG00000114013	CD86	0.97	10	18	7	7	2	2	2	138	4	20	19	7	4	0.6	4	2	15.4125	33.3063	0.468	0.030365
ENSG00000114023	FAM162A	0.97	13	20	56	19	36	34	41	18	29	19	19	61	64	15	42	31	32.3125	16.6282	43.4	1.34313
ENSG00000114030	KPNA1	0.97	33	27	33	32	16	17	17	32	13	30	21	41	27	77	33	50	31.1875	15.63	21	0.673347
ENSG00000114491	UMPS	0.97	6	13	5	9	3	2	9	13	11	3	6	12	7	1	9	13	7.625	4.11299	113	14.8197
ENSG00000115355	CCDC88A	0.97	7	11	62	8	7	5	5	22	4	9	8	18	11	2	43	9	14.4375	16.0539	4.11	0.284675
ENSG00000119285	HEATR1	0.97	12	21	5	10	11	4	8	21	5	7	13	22	13	10	30	19	13.1875	7.42266	20.7	1.56967
ENSG00000120885	CLU	0.97	96	337	1339	392	279	23	223	53	663	335	463	485	1090	25	707	1144	478.375	411.298	1407	2.94121
ENSG00000121749	TBC1D15	0.97	43	45	30	32	24	9	18	30	10	72	28	28	31	27	42	66	33.4375	17.2278	19.5	0.583178
ENSG00000121797	CCRL2	0.97	33	4	0.9	5	8	1	1	8	0.4	12	4	3	6	1	0.9	2	5.6375	8.01364	0.361	0.0640355
ENSG00000123689	G0S2	0.97	1006	41	2	1454	51	46	141	28	84	1607	88	229	46	4	68	98	312.062	532.988	5.75	0.0184258
ENSG00000125462	C1orf61	0.97	0.1	1	24	0.3	0.2	0.2	0.3	0.1	0.3	0.2	0.5	0.5	0.3	0.1	3	0.4	1.96875	5.91695	0.261	0.132571
ENSG00000126214	KLC1	0.97	4	8	19	5	5	2	3	2	0.7	7	10	7	7	3	6	5	5.85625	4.29542	15	2.56137
ENSG00000126226	PCID2	0.97	9	24	10	12	11	11	12	19	7	17	32	32	29	13	30	23	18.1875	8.87107	17.5	0.962199
ENSG00000126458	RRAS	0.97	132	187	18	157	229	38	58	39	17	287	104	85	363	55	119	86	123.375	99.8812	38.4	0.311246
ENSG00000128335	APOL2	0.97	39	46	60	37	18	18	35	45	22	103	37	40	41	15	24	37	38.5625	21.0142	42.9	1.11248
ENSG00000128578	STRIP2	0.97	0.3	3	8	1	0.4	10	8	0.8	0.2	1	1	1	0.3	27	11	24	6.0625	8.48511	1.79	0.295258
ENSG00000128694	OSGEPL1	0.97	2	8	7	6	3	5	6	5	4	1	6	13	9	4	10	10	6.1875	3.20871	0.696	0.112485
ENSG00000129993	CBFA2T3	0.97	5	16	3	4	4	3	0.7	22	2	8	14	1	3	3	4	2	5.91875	6.09909	0.849	0.143442
ENSG00000130429	ARPC1B	0.97	66	150	8	36	28	8	44	350	22	73	89	34	37	5	26	42	63.625	84.638	267	4.19646
ENSG00000130684	ZNF337	0.97	1	3	2	1	1	0.3	1	1	0.3	0.9	2	3	3	0.5	1	2	1.4375	0.937283	0.461	0.320696
ENSG00000130717	UCK1	0.97	21	23	32	20	23	14	20	20	19	16	26	32	40	27	35	40	25.5	8.10761	1.76	0.0690196
ENSG00000130783	CCDC62	0.97	0.7	2	2	0.3	0.3	0.2	0.3	0.5	0.1	0.4	1	0.7	0.9	1	130	1	8.8375	32.315	0.363	0.041075
ENSG00000131781	FMO5	0.97	1	3	4	2	4	3	5	10	58	4	2	3	4	0.5	4	4	6.96875	13.7701	2.6	0.373094
ENSG00000133121	STARD13	0.97	11	10	11	13	21	12	13	0.3	4	15	9	11	28	4	7	47	13.5188	11.0815	1.24	0.0917245
ENSG00000133392	MYH11	0.97	148	491	22	54	1693	16	31	0.4	2	174	155	254	3080	57	1116	57	459.4	841.2	121	0.263387
ENSG00000134326	CMPK2	0.97	3	7	8	5	1	3	2	33	1	7	5	7	5	0.7	7	4	6.16875	7.55263	3.42	0.554407
ENSG00000134463	ECHDC3	0.97	80	7	3	52	4	29	34	7	88	9	10	7	6	79	14	37	29.125	29.9641	10.5	0.360515
ENSG00000134755	DSC2	0.97	12	4	3	14	5	9	11	14	3	7	2	4	4	0.6	3	6	6.35	4.33743	5.21	0.820472
ENSG00000134853	PDGFRA	0.97	96	34	9	25	77	12	50	0.3	9	44	108	146	67	5	73	37	49.5187	42.1318	0.935	0.0188817
ENSG00000135930	EIF4E2	0.97	15	22	20	20	15	7	22	44	14	14	19	27	21	12	25	26	20.1875	8.36834	24.4	1.20867
ENSG00000137171	KLC4	0.97	4	6	7	7	6	4	8	4	14	6	8	9	14	3	14	12	7.875	3.75722	7.85	0.996825
ENSG00000138449	SLC40A1	0.97	69	121	5	89	66	21	82	115	130	176	137	502	199	50	110	124	124.75	112.936	0.307	0.00246092
ENSG00000139637	C12orf10	0.97	29	35	35	23	25	6	23	27	14	20	21	44	51	28	91	33	31.5625	19.1971	39.6	1.25465
ENSG00000140262	TCF12	0.97	23	22	20	21	24	8	21	31	6	31	32	62	46	13	38	29	26.6875	13.9891	3.06	0.11466
ENSG00000140386	SCAPER	0.97	3	5	13	4	4	8	4	5	1	6	5	9	10	5	15	10	6.6875	3.80734	0.17	0.0254206
ENSG00000143337	TOR1AIP1	0.97	26	34	23	35	34	16	24	72	8	21	34	58	65	28	47	75	37.5	20.2089	67.2	1.792
ENSG00000144560	VGLL4	0.97	19	15	10	13	10	3	10	11	1	21	17	35	21	2	20	39	15.4375	10.6268	2.47	0.16
ENSG00000145495	MARCH6	0.97	48	50	108	59	39	33	43	52	18	66	46	69	61	92	62	90	58.5	23.1546	0.128	0.00218803
ENSG00000151490	PTPRO	0.97	1	2	12	0.8	2	0.3	20	9	0.3	2	3	1	1	0.3	2	0.4	3.56875	5.47902	0.426	0.11937
ENSG00000151948	GLT1D1	0.97	2	0.7	30	0.3	0.9	1	0.3	86	16	4	1	0.7	0.8	0.6	22	2	10.5188	22.0525	0.164	0.0155912
ENSG00000161513	FDXR	0.97	2	3	3	2	2	0.6	3	2	2	3	2	23	7	4	18	7	5.225	6.27455	99.4	19.0239
ENSG00000161980	POLR3K	0.97	6	23	14	8	9	5	10	34	6	7	24	21	20	10	10	16	13.9375	8.3144	1.16	0.0832287
ENSG00000162409	PRKAA2	0.97	2	9	10	6	13	96	24	0.1	0.6	5	5	8	16	130	13	27	22.7937	36.549	3.64	0.159693
ENSG00000163293	NIPAL1	0.97	0.4	0.6	0.4	1	1	0.1	6	0.1	3	0.7	0.4	1	6	0.3	2	5	1.75	2.0887	1.52	0.868571
ENSG00000163430	FSTL1	0.97	239	212	40	357	208	83	85	5	15	185	191	141	220	18	206	112	144.812	99.164	8.92	0.0615969
ENSG00000163629	PTPN13	0.97	10	7	19	11	8	3	31	2	0.7	13	10	46	33	1	34	88	19.7937	22.7681	1.14	0.0575939
ENSG00000163666	HESX1	0.97	0.5	1	1	2	0.1	0.1	0.7	0.8	0.8	1	1	2	2	0.6	10	2	1.6	2.33009	0.002	0.00125
ENSG00000164134	NAA15	0.97	13	20	17	15	13	10	13	25	8	20	14	30	23	25	33	27	19.125	7.41957	76.1	3.97908
ENSG00000164237	CMBL	0.97	11	8	27	36	36	18	75	0.4	19	11	13	59	57	83	22	40	32.2125	24.7748	26.4	0.819558
ENSG00000164754	RAD21	0.97	105	110	163	91	123	75	73	205	30	134	128	131	188	69	182	238	127.812	55.9645	33.2	0.259756
ENSG00000165168	CYBB	0.97	55	88	17	38	3	16	17	1275	14	37	83	39	27	1	16	13	108.688	312.069	6.66	0.0612766
ENSG00000165916	PSMC3	0.97	110	123	91	98	92	53	73	52	71	84	61	100	108	167	117	153	97.0625	32.8136	230	2.36961
ENSG00000166578	IQCD	0.97	0.7	1	3	0.7	0.6	0.5	2	0.9	0.3	8	0.9	7	2	0.5	37	2	4.19375	9.0412	0.3	0.071535
ENSG00000167220	HDHD2	0.97	9	17	50	18	13	9	20	25	8	10	16	29	24	3	23	30	19	11.4543	37.1	1.95263
ENSG00000167645	YIF1B	0.97	8	13	8	7	4	3	9	15	12	7	14	13	11	7	11	8	9.375	3.5	4.86	0.5184
ENSG00000167799	NUDT8	0.97	2	5	2	8	2	7	8	0.7	11	3	2	4	3	5	2	8	4.54375	3.01285	2.64	0.581018
ENSG00000168280	KIF5C	0.97	1	2	300	2	7	0.7	2	3	0.1	1	4	3	12	0.1	34	2	23.3687	74.2356	7.01	0.299973
ENSG00000168538	TRAPPC11	0.97	19	23	24	19	14	9	18	43	9	12	16	46	32	11	33	32	22.5	11.639	4.39	0.195111
ENSG00000168878	SFTPB	0.97	0.4	1	0.9	0.5	0.4	0.1	0.6	0.9	0.3	1491	17	0.7	0.3	0.1	0.5	11	95.3563	372.202	5.36	0.0562103
ENSG00000169071	ROR2	0.97	1	3	0.5	2	20	0.2	2	0.1	0.1	7	4	28	33	0.1	15	8	7.75	10.5966	7.24	0.934194
ENSG00000170345	FOS	0.97	247	419	57	845	94	9	56	1012	19	151	277	120	213	31	67	351	248	293.745	0.574	0.00231452
ENSG00000172197	MBOAT1	0.97	5	11	3	12	6	3	5	34	2	12	13	26	23	1	5	8	10.5625	9.49364	0.1	0.00946746
ENSG00000172349	IL16	0.97	2	24	0.6	4	1	0.6	0.7	74	0.8	7	24	3	3	0.3	2	2	9.3125	18.8651	30.4	3.26443
ENSG00000172482	AGXT	0.97	0.2	0.6	0.2	0.6	0.1	0.1	0.7	0.1	501	0.3	0.1	0.2	0.1	0.1	0.3	0.3	31.5625	125.183	32.7	1.03604
ENSG00000174606	ANGEL2	0.97	12	29	21	19	5	5	11	20	5	8	12	35	16	6	13	18	14.6875	8.75381	1.68	0.114383
ENSG00000175489	LRRC25	0.97	9	14	1	5	0.8	3	4	233	3	8	11	6	4	0.9	2	2	19.1687	57.1509	0.783	0.0408477
ENSG00000176919	C8G	0.97	0.1	2	0.6	0.3	0.3	0.2	1	0.4	287	0.3	0.5	0.3	2	1	2	2	18.75	71.537	158	8.42667
ENSG00000177302	TOP3A	0.97	8	15	8	6	4	2	7	23	5	6	10	13	10	3	11	10	8.8125	5.19254	0.884	0.100312
ENSG00000177732	SOX12	0.97	4	7	6	4	9	4	7	3	1	6	12	23	16	1	17	6	7.875	6.17387	0.354	0.0449524
ENSG00000179119	SPTY2D1	0.97	12	15	11	15	9	5	17	46	6	19	17	30	21	12	14	27	17.25	10.2013	0.59	0.0342029
ENSG00000180190	TDRP	0.97	11	15	13	10	10	2	18	5	7	23	10	29	22	1	17	48	15.0625	11.6474	2.13	0.141411
ENSG00000181163	NPM1	0.97	271	427	161	204	443	95	189	398	128	408	339	998	648	192	396	499	362.25	227.957	2356	6.5038
ENSG00000183010	PYCR1	0.97	0.9	8	3	3	7	0.4	4	0.2	4	6	11	29	7	7	10	6	6.65625	6.76816	94.8	14.2423
ENSG00000183091	NEB	0.97	0.3	0.8	0.4	17	0.2	2	0.4	0.1	0.1	0.4	2	0.3	0.3	952	29	180	74.0812	238.332	0.139	0.00187632
ENSG00000185104	FAF1	0.97	12	19	27	18	15	17	16	17	10	13	18	40	29	58	51	38	24.875	14.5138	46.8	1.88141
ENSG00000185811	IKZF1	0.97	2	55	3	2	0.9	0.9	2	260	2	13	78	3	2	0.3	3	1	26.7563	66.0673	2.34	0.0874562
ENSG00000186409	CCDC30	0.97	0.6	2	2	0.9	0.7	0.2	3	0.5	0.2	2	1	5	2	0.2	4	3	1.70625	1.44797	0.003	0.00175824
ENSG00000186603	HPDL	0.97	0.7	4	2	0.4	0.9	0.1	0.7	0.6	0.1	0.1	0.4	2	0.3	0.3	0.3	5	1.11875	1.45475	2.36	2.1095
ENSG00000187498	COL4A1	0.97	353	152	10	315	233	51	102	0.1	9	582	114	53	154	29	88	61	144.131	157.603	8.69	0.0602923
ENSG00000196209	SIRPB2	0.97	4	3	0.6	2	0.4	0.9	1	57	0.7	2	4	1	0.9	0.3	0.9	0.9	4.975	13.9244	0.12	0.0241206
ENSG00000196476	C20orf96	0.97	6	13	13	8	6	2	11	4	2	24	12	46	19	0.8	46	23	14.7375	14.1104	0.134	0.00909245
ENSG00000196867	ZFP28	0.97	3	4	9	4	4	3	4	3	0.4	3	3	13	8	3	10	5	4.9625	3.29785	1.03	0.207557
ENSG00000198169	ZNF251	0.97	4	14	8	7	4	2	6	4	1	5	9	21	18	2	14	21	8.75	6.75771	0.084	0.0096
ENSG00000198482	ZNF808	0.97	6	10	7	10	5	5	9	12	1	6	10	12	9	3	11	14	8.125	3.57538	0.216	0.0265846
ENSG00000198843	SELENOT	0.97	36	83	128	67	51	34	92	136	44	84	100	95	91	26	80	90	77.3125	32.2629	4.09	0.0529022
ENSG00000198862	LTN1	0.97	14	14	19	14	10	8	14	28	5	13	15	21	23	21	20	21	16.25	5.99444	2.27	0.139692
ENSG00000204428	LY6G5C	0.97	1	2	1	1	0.6	0.6	1	4	0.6	1	3	1	3	0.3	4	0.7	1.55	1.24419	0.17	0.109677
ENSG00000213066	FGFR1OP	0.97	0.9	3	3	2	2	1	4	1	3	2	4	7	4	0.4	12	6	3.45625	2.91935	12.3	3.55877
ENSG00000213865	C8orf44	0.97	3	10	8	5	2	2	3	1	0.6	2	8	7	6	2	5	9	4.6	3.06377	0.048	0.0104348
ENSG00000215012	RTL10	0.97	3	13	10	5	2	2	6	8	3	4	9	12	8	3	6	15	6.8125	4.10234	0.124	0.0182018
ENSG00000215301	DDX3X	0.97	245	159	150	172	123	68	104	217	52	159	204	215	131	78	119	256	153.25	62.2077	229	1.49429
ENSG00000225921	NOL7	0.97	60	118	94	61	79	31	79	64	31	51	71	139	98	30	118	126	78.125	34.825	25	0.32
ENSG00000235568	NFAM1	0.97	9	19	1	3	1	0.9	2	171	3	6	7	3	2	0.2	2	1	14.4437	42.0102	0.275	0.0190394
ENSG00000238083	LRRC37A2	0.97	3	7	4	8	13	0.7	5	4	2	5	14	7	10	3	7	4	6.04375	3.75996	0.101	0.0167115
ENSG00000242689	CNTF	0.97	1	2	2	1	0.2	0.5	0.4	0.7	0.8	2	3	4	0.9	3	0.8	6	1.76875	1.57002	0.267	0.150954
ENSG00000243943	ZNF512	0.97	9	17	27	15	20	7	14	21	2	17	27	71	47	4	32	35	22.8125	17.5508	5.86	0.256877
ENSG00000244607	CCDC13	0.97	0.7	0.6	2	0.4	0.6	0.2	0.9	0.1	0.3	2	0.8	2	0.7	0.2	5	3	1.21875	1.30956	0.011	0.00902564
ENSG00000244687	UBE2V1	0.97	6	10	7	7	4	2	4	5	2	6	6	7	5	3	5	6	5.3125	2.05649	34.7	6.53176
ENSG00000244687	UBE2V1	0.97	6	10	7	7	4	2	4	5	2	6	6	7	5	3	5	6	5.3125	2.05649	13.9	2.61647
ENSG00000248712	CCDC153	0.97	1	1	0.8	1	0.6	0.3	1	0.8	0.1	5	0.7	4	2	0.2	3	0.9	1.4	1.4076	0.15	0.107143
ENSG00000249709	ZNF564	0.97	0.7	1	0.9	0.3	0.3	0.3	0.7	0.2	0.1	0.2	0.6	1	0.8	0.6	0.9	0.8	0.5875	0.30957	0.048	0.0817021
ENSG00000257923	CUX1	0.97	15	13	12	11	18	13	14	26	5	23	13	34	29	21	16	26	18.0625	7.73278	4.97	0.275156
ENSG00000001167	NFYA	0.96	17	16	19	17	12	5	18	55	6	42	22	40	26	8	57	26	24.125	16.227	20.1	0.833161
ENSG00000001460	STPG1	0.96	2	3	6	3	2	0.9	3	1	0.4	4	3	7	5	0.8	17	3	3.81875	3.97731	0.06	0.0157119
ENSG00000005884	ITGA3	0.96	12	19	5	9	8	3	29	1	0.6	60	11	21	22	4	9	40	15.85	16.0204	7.4	0.466877
ENSG00000008394	MGST1	0.96	171	12	18	404	44	7	65	14	278	46	42	4	104	6	14	137	85.375	113.639	103	1.20644
ENSG00000008853	RHOBTB2	0.96	10	18	28	6	4	7	8	10	1	31	12	20	13	13	12	32	14.0625	9.38416	0.247	0.0175644
ENSG00000010030	ETV7	0.96	0.2	4	0.8	0.3	0.4	0.3	0.7	1	0.4	11	5	5	3	0.2	2	0.7	2.1875	2.9056	0.561	0.256457
ENSG00000013306	SLC25A39	0.96	24	54	13	32	30	8	62	25	37	72	56	53	40	12	59	72	40.5625	21.1344	0.3	0.00739599
ENSG00000013503	POLR3B	0.96	4	12	6	8	3	4	9	11	7	5	6	24	11	4	13	14	8.8125	5.36928	2.09	0.237163
ENSG00000033100	CHPF2	0.96	13	31	9	11	4	5	14	33	8	10	26	27	10	2	14	27	15.25	10.116	0.259	0.0169836
ENSG00000035664	DAPK2	0.96	7	3	3	7	1	3	0.7	2	0.3	5	3	1	2	15	1	38	5.75	9.3473	0.897	0.156
ENSG00000040341	STAU2	0.96	10	11	44	14	11	20	14	15	6	13	14	17	18	12	16	15	15.625	8.27748	7.16	0.45824
ENSG00000052802	MSMO1	0.96	18	41	92	30	20	6	61	24	390	348	35	162	34	6	80	24	85.6875	117.605	4.68	0.0546171
ENSG00000066735	KIF26A	0.96	4	4	0.8	5	2	2	2	0.3	0.3	3	2	29	2	0.1	4	2	3.90625	6.84928	0.038	0.009728
ENSG00000070061	ELP1	0.96	10	23	23	16	11	9	22	29	20	13	21	60	25	6	42	26	22.25	13.4932	18.1	0.813483
ENSG00000075415	SLC25A3	0.96	83	137	110	125	108	169	119	119	75	95	75	186	151	113	81	182	120.5	36.2694	377	3.12863
ENSG00000079435	LIPE	0.96	241	6	16	306	4	3	1	2	0.2	3	7	3	3	1	24	6	39.1375	92.4554	25.8	0.659214
ENSG00000083937	CHMP2B	0.96	42	60	82	51	44	28	57	70	28	71	45	79	79	19	71	119	59.0625	25.3495	19.4	0.328466
ENSG00000091157	WDR7	0.96	5	5	26	6	4	3	4	15	3	4	7	8	8	5	6	8	7.3125	5.77025	2.62	0.358291
ENSG00000092841	MYL6	0.96	360	583	110	476	766	64	416	408	113	790	397	367	1085	37	420	325	419.812	283.836	1724	4.1066
ENSG00000101849	TBL1X	0.96	18	19	13	17	18	4	20	67	13	15	21	45	56	13	38	25	25.125	17.3316	3.29	0.130945
ENSG00000102572	STK24	0.96	15	13	11	10	14	7	13	32	2	19	17	16	29	8	21	18	15.3125	7.66567	41.1	2.68408
ENSG00000103569	AQP9	0.96	17	1	1	5	1	0.9	2	425	142	56	25	9	3	0.1	10	0.3	43.6437	107.884	0.292	0.00669053
ENSG00000104147	OIP5	0.96	0.5	1	0.8	1	0.8	0.4	0.4	1	0.4	0.1	2	4	2	3	32	1	3.15	7.76428	1.4	0.444444
ENSG00000104529	EEF1D	0.96	19	28	5	14	20	6	7	28	6	20	37	35	29	11	16	20	18.8125	10.3937	468	24.8771
ENSG00000105976	MET	0.96	27	26	16	20	13	6	37	0.2	19	22	20	6	23	10	14	78	21.075	17.7361	2.17	0.102966
ENSG00000106078	COBL	0.96	1	0.1	23	4	4	13	5	0.1	6	10	0.8	3	3	35	3	18	8.0625	9.75909	1.51	0.187287
ENSG00000106772	PRUNE2	0.96	5	26	54	3	55	0.7	12	2	0.5	12	11	17	140	18	26	25	25.45	34.8478	0.504	0.0198035
ENSG00000107819	SFXN3	0.96	31	26	32	21	14	6	14	25	2	35	27	29	27	2	20	18	20.5625	10.4752	23	1.11854
ENSG00000107897	ACBD5	0.96	29	22	73	34	17	46	52	38	24	19	23	24	29	25	34	56	34.0625	15.4896	4.04	0.118606
ENSG00000110108	TMEM109	0.96	147	172	29	127	106	47	71	121	28	157	137	173	220	91	97	124	115.438	53.9592	44.8	0.388089
ENSG00000110169	HPX	0.96	0.1	0.4	0.3	0.4	0.5	0.1	0.2	0.2	2347	0.2	0.4	2	1	0.1	0.6	0.3	147.113	586.637	7820	53.1566
ENSG00000110628	SLC22A18	0.96	2	2	1	3	2	2	8	5	15	2	2	3	2	0.2	3	4	3.5125	3.54624	2.17	0.617794
ENSG00000111252	SH2B3	0.96	55	59	10	30	12	23	11	112	9	57	45	29	18	7	22	23	32.625	27.563	0.277	0.00849042
ENSG00000111906	HDDC2	0.96	14	25	41	25	14	14	20	14	3	16	15	29	23	13	36	37	21.1875	10.4129	26.2	1.23658
ENSG00000112210	RAB23	0.96	6	8	7	7	46	3	7	0.9	0.7	11	10	24	87	5	19	17	16.1625	21.9616	9.18	0.567981
ENSG00000113013	HSPA9	0.96	109	177	221	130	106	133	209	126	193	129	114	287	166	234	163	438	183.438	85.2541	739	4.02862
ENSG00000113552	GNPDA1	0.96	17	30	20	16	21	8	44	36	6	17	25	48	56	19	33	53	28.0625	15.5584	63.4	2.25924
ENSG00000114738	MAPKAPK3	0.96	12	21	10	16	8	110	35	135	9	20	16	22	18	89	11	95	39.1875	42.1081	4.96	0.126571
ENSG00000116580	GON4L	0.96	7	21	9	7	5	3	6	13	2	9	8	14	12	6	9	13	9	4.74693	1.05	0.116667
ENSG00000117758	STX12	0.96	98	77	130	93	54	19	58	60	17	188	47	69	95	17	59	507	99.25	117.235	48.6	0.489673
ENSG00000120709	FAM53C	0.96	11	15	19	15	10	12	12	37	4	17	22	21	23	20	48	18	19	10.6458	1.39	0.0731579
ENSG00000124608	AARS2	0.96	4	8	5	4	3	2	6	6	3	4	7	13	10	3	6	6	5.625	2.87228	13.5	2.4
ENSG00000125347	IRF1	0.96	4	26	4	8	6	2	9	114	4	146	31	12	22	5	8	5	25.375	42.1282	0.56	0.022069
ENSG00000125735	TNFSF14	0.96	0.6	6	0.4	1	1	0.3	3	28	22	2	12	7	5	0.1	0.9	0.8	5.63125	8.29335	0.087	0.0154495
ENSG00000125818	PSMF1	0.96	63	70	46	54	34	21	41	79	38	56	51	82	76	59	114	80	60.25	22.9449	44	0.73029
ENSG00000127152	BCL11B	0.96	0.7	15	5	0.8	0.4	0.1	0.5	64	0.3	6	28	2	2	0.1	2	1	7.99375	16.6498	1.49	0.186396
ENSG00000127337	YEATS4	0.96	15	30	30	19	19	13	21	35	9	14	22	25	31	12	101	33	26.8125	21.386	4.27	0.159254
ENSG00000127603	MACF1	0.96	17	28	30	19	13	18	14	18	5	65	21	34	21	5	19	30	22.3125	14.0367	17.7	0.793277
ENSG00000127603	MACF1	0.96	17	28	30	19	13	18	14	18	5	65	21	34	21	5	19	30	22.3125	14.0367	0.235	0.0105322
ENSG00000127884	ECHS1	0.96	152	136	127	454	93	136	273	74	593	68	88	194	204	92	151	213	190.5	143.818	223	1.1706
ENSG00000128567	PODXL	0.96	82	83	42	63	46	33	178	1	2	202	60	60	36	3	16	77	61.5	57.2818	11.1	0.180488
ENSG00000128641	MYO1B	0.96	61	40	10	32	22	10	30	0.6	105	82	23	24	22	4	24	22	31.975	28.2665	21.6	0.675528
ENSG00000129167	TPH1	0.96	0.6	4	1	0.9	0.4	0.1	0.4	0.1	0.1	1	0.5	2	0.6	0.2	2	1	0.93125	1.00976	0.02	0.0214765
ENSG00000130733	YIPF2	0.96	18	18	7	15	8	2	12	10	9	16	13	27	18	8	33	34	15.5	9.15787	1.01	0.0651613
ENSG00000130816	DNMT1	0.96	8	19	6	7	5	4	6	27	3	10	23	18	9	3	23	10	11.3125	7.95587	26.2	2.31602
ENSG00000131351	HAUS8	0.96	2	8	0.9	2	1	0.7	2	4	1	2	5	3	2	0.5	10	3	2.94375	2.68203	3.03	1.0293
ENSG00000131697	NPHP4	0.96	2	2	2	0.8	0.6	0.4	1	1	0.4	2	2	4	2	0.2	4	6	1.9	1.58325	0.212	0.111579
ENSG00000131876	SNRPA1	0.96	12	68	22	14	9	8	13	13	12	28	23	24	22	6	28	38	21.25	15.2469	212	9.97647
ENSG00000131899	LLGL1	0.96	6	8	31	6	3	2	3	9	0.7	3	10	15	9	4	10	5	7.79375	7.23238	5.23	0.671051
ENSG00000132635	PCED1A	0.96	14	35	16	13	7	3	13	12	6	18	41	33	23	2	14	62	19.5	15.9917	0.306	0.0156923
ENSG00000133028	SCO1	0.96	8	19	11	11	6	8	11	13	9	6	15	16	12	6	10	20	11.3125	4.3775	27.3	2.41326
ENSG00000133131	MORC4	0.96	12	10	5	16	8	2	10	5	8	15	11	47	14	8	32	24	14.1875	11.4788	0.072	0.00507489
ENSG00000133872	SARAF	0.96	220	304	695	240	303	101	293	939	316	446	553	534	481	62	326	564	398.562	224.9	0.849	0.00213016
ENSG00000133958	UNC79	0.96	0.1	0.3	6	0.3	0.3	0.1	0.5	0.1	0.1	0.2	0.3	0.4	0.3	0.2	3	0.3	0.78125	1.55573	0.022	0.02816
ENSG00000134602	STK26	0.96	6	30	2	5	15	2	10	117	5	19	32	11	58	0.9	31	13	22.3062	29.4932	56.3	2.52396
ENSG00000135900	MRPL44	0.96	24	41	31	40	19	26	37	68	29	22	39	38	31	27	49	51	35.75	12.5989	50.9	1.42378
ENSG00000136108	CKAP2	0.96	6	8	15	7	4	6	4	28	2	5	16	8	5	5	52	4	10.9375	12.7304	2	0.182857
ENSG00000136514	RTP4	0.96	2	10	0.7	7	7	1	2	25	1	14	5	8	8	0.3	3	5	6.1875	6.34569	0.074	0.0119596
ENSG00000137274	BPHL	0.96	6	7	6	13	3	2	9	2	7	4	2	9	7	1	6	6	5.625	3.20156	15.4	2.73778
ENSG00000137312	FLOT1	0.96	113	218	132	89	95	76	123	99	71	229	175	138	185	47	96	146	127	52.5497	119	0.937008
ENSG00000137462	TLR2	0.96	16	14	13	6	2	6	15	227	6	51	19	6	11	0.7	8	6	25.4187	54.9962	0.228	0.00896976
ENSG00000138246	DNAJC13	0.96	20	21	12	24	17	15	19	51	6	16	21	34	33	16	26	31	22.625	10.7012	18.3	0.80884
ENSG00000138459	SLC35A5	0.96	15	25	52	20	15	8	23	47	13	16	37	38	31	4	35	46	26.5625	14.7149	0.08	0.00301176
ENSG00000138640	FAM13A	0.96	14	7	9	21	10	2	11	4	7	5	9	13	19	3	10	32	11	7.70281	0.643	0.0584545
ENSG00000138942	RNF185	0.96	34	44	33	35	24	14	43	46	39	31	35	58	75	19	33	83	40.375	18.4314	0.255	0.00631579
ENSG00000139117	CPNE8	0.96	18	21	13	11	19	5	19	17	6	39	24	18	18	4	11	9	15.75	8.64484	1.75	0.111111
ENSG00000139908	TSSK4	0.96	2	14	9	4	2	0.8	4	4	0.5	1	5	13	1	0.1	25	10	5.9625	6.76302	0.003	0.000503145
ENSG00000141127	PRPSAP2	0.96	6	16	22	10	9	4	15	24	8	11	16	27	21	4	23	26	15.125	7.9404	104	6.87603
ENSG00000143761	ARF1	0.96	213	234	191	154	159	103	190	367	156	489	243	233	328	263	253	256	239.5	93.9255	190	0.793319
ENSG00000143776	CDC42BPA	0.96	29	15	37	21	25	13	22	0.7	6	22	14	35	45	5	42	13	21.5437	13.2975	1.95	0.0905135
ENSG00000145740	SLC30A5	0.96	17	22	12	36	17	12	35	38	15	31	30	51	37	8	28	39	26.75	12.3585	0.592	0.0221308
ENSG00000146416	AIG1	0.96	14	14	33	37	11	20	28	8	50	19	11	29	29	2	20	23	21.75	12.2393	0.796	0.0365977
ENSG00000148459	PDSS1	0.96	2	13	8	6	4	3	9	8	9	4	9	9	8	4	11	5	7	3.09839	0.908	0.129714
ENSG00000149328	GLB1L2	0.96	0.5	2	4	2	7	0.2	6	1	0.3	4	0.6	15	7	0.4	7	17	4.625	5.14231	0.306	0.0661622
ENSG00000150337	FCGR1A	0.96	0.8	9	15	1	0.1	0.8	2	12	0.3	3	3	4	1	0.2	4	1	3.575	4.50133	0.539	0.150769
ENSG00000151176	PLBD2	0.96	71	36	46	90	23	18	21	47	38	36	53	156	54	34	89	54	54.125	34.6196	10	0.184758
ENSG00000157110	RBPMS	0.96	61	49	3	32	58	32	41	0.2	14	61	48	54	153	6	48	35	43.45	35.7105	9.01	0.207365
ENSG00000158715	SLC45A3	0.96	0.7	21	15	1	2	0.6	3	3	6	5	11	7	62	0.7	6	1	9.0625	15.2497	0.345	0.038069
ENSG00000159023	EPB41	0.96	21	30	6	23	13	5	15	153	10	28	50	36	23	18	21	20	29.5	34.8176	56.6	1.91864
ENSG00000160049	DFFA	0.96	25	25	22	25	25	9	24	18	10	15	25	52	35	14	31	23	23.625	10.3271	33.1	1.40106
ENSG00000160285	LSS	0.96	23	14	28	35	10	6	11	9	16	13	26	56	25	11	18	21	20.125	12.4893	29.6	1.47081
ENSG00000162407	PLPP3	0.96	103	77	113	73	88	44	97	0.4	54	227	109	173	234	24	226	510	134.525	123	0.84	0.00624419
ENSG00000163513	TGFBR2	0.96	431	498	21	311	344	151	182	300	48	338	546	98	350	42	131	198	249.312	164.434	0.79	0.00316871
ENSG00000163932	PRKCD	0.96	21	49	8	69	10	7	32	177	3	43	46	26	47	6	40	83	41.6875	43.0096	58.3	1.3985
ENSG00000164024	METAP1	0.96	21	49	19	27	31	33	31	45	13	27	41	43	92	28	65	36	37.5625	19.3045	55.1	1.46689
ENSG00000164296	TIGD6	0.96	3	5	3	4	2	0.9	3	2	2	2	2	6	4	0.9	6	7	3.3	1.86869	0.588	0.178182
ENSG00000165474	GJB2	0.96	0.7	2	4	4	5	0.2	19	0.1	28	5	2	3	4	0.5	5	2	5.28125	7.499	0.159	0.0301065
ENSG00000165714	BORCS5	0.96	4	4	14	5	3	2	4	7	3	4	5	5	6	5	7	4	5.125	2.72947	14.1	2.75122
ENSG00000166813	KIF7	0.96	4	5	1	2	3	0.9	1	0.4	0.2	1	2	9	7	0.4	3	3	2.68125	2.51852	0.184	0.0686247
ENSG00000166881	NEMP1	0.96	5	11	3	9	9	2	7	16	2	7	18	14	18	2	15	9	9.1875	5.6712	0.747	0.0813061
ENSG00000167676	PLIN4	0.96	923	16	4	2313	44	34	4	0.3	11	1	10	33	44	145	11	44	227.331	600.263	75.8	0.333434
ENSG00000167881	SRP68	0.96	31	38	34	26	27	14	27	39	16	34	37	55	56	59	35	76	37.75	16.4012	78.2	2.07152
ENSG00000167981	ZNF597	0.96	2	5	6	3	0.9	1	3	6	2	4	5	10	6	0.6	14	8	4.78125	3.61851	0.095	0.0198693
ENSG00000168229	PTGDR	0.96	0.6	5	0.3	2	2	0.4	0.3	16	0.2	4	8	4	1	0.1	0.5	0.3	2.79375	4.18098	0.002	0.000715884
ENSG00000168385	2002-09-01	0.96	208	207	226	277	138	44	170	184	37	227	169	291	220	44	248	260	184.375	81.3748	337	1.8278
ENSG00000168765	GSTM4	0.96	6	16	15	12	7	7	12	4	3	8	10	34	32	8	12	19	12.8125	8.99792	17.3	1.35024
ENSG00000168876	ANKRD49	0.96	5	19	7	9	5	3	13	23	6	9	32	15	17	2	9	23	12.3125	8.53009	0.441	0.0358173
ENSG00000170153	RNF150	0.96	8	15	9	37	25	25	17	0.1	0.5	3	12	33	36	3	14	19	16.0375	12.2937	4.62	0.288075
ENSG00000170323	FABP4	0.96	11145	364	3	6448	1749	240	16	0.3	1	509	648	15	566	62	97	321	1386.52	3048.43	330	0.238006
ENSG00000170949	ZNF160	0.96	11	21	13	11	9	4	9	10	3	8	11	24	17	3	12	20	11.625	6.21691	0.405	0.0348387
ENSG00000171150	SOCS5	0.96	23	39	29	35	23	12	22	19	6	20	38	136	41	12	40	35	33.125	29.5564	0.165	0.00498113
ENSG00000171206	TRIM8	0.96	118	93	69	179	67	35	71	126	26	135	110	103	115	49	64	111	91.9375	40.3476	0.18	0.00195785
ENSG00000171777	RASGRP4	0.96	3	3	1	2	0.4	0.5	0.7	69	0.7	5	2	1	1	0.9	1	0.7	5.74375	16.9132	0.155	0.0269859
ENSG00000172081	MOB3A	0.96	46	65	10	35	23	6	16	262	3	26	64	58	40	17	25	27	45.1875	61.0183	127	2.81051
ENSG00000172292	CERS6	0.96	16	5	24	11	14	33	13	22	8	11	13	21	18	4	21	18	15.75	7.51443	0.893	0.0566984
ENSG00000172379	ARNT2	0.96	1	12	140	1	5	1	12	0.1	0.3	3	4	21	15	5	14	21	15.9625	33.8549	0.969	0.0607048
ENSG00000172830	SSH3	0.96	16	12	8	12	11	4	8	7	4	17	11	31	50	5	13	23	14.5	11.8434	8.34	0.575172
ENSG00000173020	GRK2	0.96	19	69	28	14	15	10	14	147	8	34	78	25	23	15	16	17	33.25	36.3052	28.5	0.857143
ENSG00000173145	NOC3L	0.96	7	18	7	10	12	5	6	17	6	12	13	25	17	13	28	37	14.5625	8.9738	24.9	1.70987
ENSG00000173786	CNP	0.96	30	37	548	25	22	6	29	25	14	16	34	50	35	10	25	29	58.4375	131.007	201	3.43957
ENSG00000175581	MRPL48	0.96	7	21	20	10	11	7	14	17	8	8	11	20	20	4	10	17	12.8125	5.61211	74.2	5.79122
ENSG00000177599	ZNF491	0.96	1	4	2	3	0.8	0.6	1	2	0.6	1	1	6	4	0.9	2	3	2.05625	1.56033	0.135	0.0656535
ENSG00000178184	PARD6G	0.96	4	25	2	6	6	1	9	0.3	2	7	20	21	15	0.9	8	29	9.7625	9.3059	0.477	0.0488604
ENSG00000179476	C14orf28	0.96	5	6	4	8	6	4	5	7	4	5	6	8	16	3	12	8	6.6875	3.32102	0.078	0.0116636
ENSG00000179833	SERTAD2	0.96	31	27	17	20	18	8	12	52	7	31	38	43	32	12	26	22	24.75	12.7671	0.139	0.00561616
ENSG00000180938	ZNF572	0.96	0.2	2	0.3	0.4	0.8	0.4	2	2	0.7	0.3	1	7	5	0.1	6	7	2.2	2.53298	0.144	0.0654545
ENSG00000181381	DDX60L	0.96	4	9	1	6	3	2	3	35	2	5	8	12	7	1	3	7	6.75	8.15271	0.169	0.025037
ENSG00000182087	TMEM259	0.96	31	64	20	37	18	12	30	24	23	47	65	41	40	17	39	55	35.1875	16.4082	1.19	0.0338188
ENSG00000182704	TSKU	0.96	38	11	2	90	8	5	42	0.4	205	15	10	51	34	2	27	50	36.9	51.0401	3.08	0.0834688
ENSG00000182934	SRPRA	0.96	94	121	42	61	53	32	79	161	126	139	109	118	107	81	88	134	96.5625	36.9504	61.5	0.636893
ENSG00000184857	TMEM186	0.96	9	15	12	14	10	6	10	15	8	4	9	19	16	8	17	29	12.5625	6.07694	0.288	0.0229254
ENSG00000185864	NPIPB4	0.96	4	23	6	9	3	2	4	3	1	9	14	12	8	2	3	5	6.75	5.74456	0.053	0.00785185
ENSG00000186280	KDM4D	0.96	0.9	2	2	1	0.1	0.6	1	0.8	0.4	0.2	0.2	3	0.7	0.4	75	2	5.64375	18.5132	0.006	0.00106312
ENSG00000186687	LYRM7	0.96	8	14	36	21	11	20	17	20	6	6	13	22	21	9	20	17	16.3125	7.68304	45.7	2.80153
ENSG00000187474	FPR3	0.96	13	10	1	18	3	4	4	6	6	16	11	12	8	0.9	9	2	7.74375	5.28116	0	0
ENSG00000187676	B3GLCT	0.96	9	13	21	11	7	21	11	8	3	5	13	29	10	3	19	15	12.375	7.19143	3.07	0.248081
ENSG00000188822	CNR2	0.96	0.8	29	1	0.9	0.6	0.3	0.9	10	0.3	0.9	21	1	0.4	0.4	1	2	4.40625	8.49427	0.355	0.0805674
ENSG00000196367	TRRAP	0.96	10	17	8	8	5	5	8	26	4	9	17	22	13	6	20	21	12.4375	7.06134	4.54	0.365025
ENSG00000196419	XRCC6	0.96	210	276	220	173	172	91	153	296	74	263	172	365	267	184	481	365	235.125	106.502	820	3.48751
ENSG00000196584	XRCC2	0.96	0.8	3	2	2	0.5	0.9	1	1	0.3	1	1	2	2	0.2	5	1	1.48125	1.20345	0.137	0.0924895
ENSG00000198176	TFDP1	0.96	18	51	21	43	29	27	39	52	19	41	46	52	40	10	70	49	37.9375	16.0103	1.99	0.0524547
ENSG00000198265	HELZ	0.96	16	15	11	20	9	7	9	41	4	14	17	25	15	11	21	18	15.8125	8.68116	1.59	0.100553
ENSG00000198829	SUCNR1	0.96	4	8	0.1	14	0.2	0.2	34	2	2	2	4	2	1	0.2	0.2	12	5.36875	8.74831	0.142	0.0264494
ENSG00000198830	HMGN2	0.96	214	253	158	255	237	58	210	630	61	331	169	534	571	199	301	449	289.375	172.311	386	1.33391
ENSG00000204104	TRAF3IP1	0.96	21	15	24	24	14	6	12	9	4	19	9	38	20	13	50	36	19.625	12.5956	0.83	0.042293
ENSG00000204560	DHX16	0.96	16	28	12	15	14	8	19	27	9	15	27	26	29	40	48	34	22.9375	11.4103	16.2	0.706267
ENSG00000204577	LILRB3	0.96	5	2	1	1	0.8	0.7	1	64	1	8	4	2	2	0.2	1	0.9	5.9125	15.6219	1.1	0.186047
ENSG00000213626	LBH	0.96	21	108	8	32	15	48	31	234	5	129	155	258	35	8	47	378	94.5	110.209	2.89	0.030582
ENSG00000214517	PPME1	0.96	9	9	34	12	9	5	16	7	5	11	11	26	19	20	33	23	15.5625	9.38061	91.6	5.88594
ENSG00000221869	CEBPD	0.96	192	115	33	53	221	45	112	176	97	367	262	108	408	300	66	168	170.188	115.008	3.39	0.0199192
ENSG00000235109	ZSCAN31	0.96	1	3	5	4	4	3	5	0.2	1	3	1	16	13	1	16	9	5.325	5.3	0.323	0.0606573
ENSG00000239521	GATS	0.96	10	10	63	7	5	3	6	4	0.5	5	16	12	8	40	7	12	13.0312	16.0608	0.008	0.000613909
ENSG00000243749	TMEM35B	0.96	14	18	3	6	9	1	5	17	1	18	11	8	16	2	13	15	9.8125	6.24199	0.944	0.0962038
ENSG00000250305	KIAA1456	0.96	0.6	3	6	3	1	4	6	0.2	0.9	2	1	3	2	0.2	3	48	5.24375	11.545	0.276	0.0526341
ENSG00000258484	SPESP1	0.96	1	2	4	3	4	3	3	3	0.6	4	4	4	5	1	143	1	11.6	35.066	0.114	0.00982759
ENSG00000002919	SNX11	0.95	11	30	14	17	10	4	17	65	8	12	23	19	22	7	16	30	19.0625	14.3966	1.14	0.0598033
ENSG00000010404	IDS	0.95	26	42	370	27	32	23	25	115	8	64	53	64	63	15	28	46	62.5625	86.0256	25	0.3996
ENSG00000010671	BTK	0.95	2	29	2	3	0.8	1	2	89	0.9	11	25	3	3	0.2	3	0.9	10.9875	22.5502	70	6.37088
ENSG00000022267	FHL1	0.95	492	147	72	896	279	249	29	16	8	398	114	63	486	1977	224	958	400.5	512.14	133	0.332085
ENSG00000023516	AKAP11	0.95	37	34	181	37	33	19	25	61	9	29	39	56	45	14	65	34	44.875	39.5068	1.51	0.033649
ENSG00000023608	SNAPC1	0.95	9	13	6	10	12	6	11	8	2	19	14	22	20	5	50	16	13.9375	11.1623	0.76	0.0545291
ENSG00000030110	BAK1	0.95	11	35	10	14	15	8	27	75	7	26	33	23	21	6	15	20	21.625	16.8281	8.07	0.373179
ENSG00000065308	TRAM2	0.95	46	32	4	22	21	6	12	25	26	18	56	56	31	3	37	30	26.5625	16.5488	0.107	0.00402824
ENSG00000065665	SEC61A2	0.95	3	9	36	5	3	5	5	2	7	5	10	12	7	5	24	11	9.3125	8.85226	12.1	1.29933
ENSG00000066379	ZNRD1	0.95	5	10	3	4	5	1	5	14	4	9	10	10	11	5	10	7	7.0625	3.5678	12.8	1.81239
ENSG00000071626	DAZAP1	0.95	22	52	20	22	21	8	17	17	10	25	31	33	23	11	40	39	24.4375	11.9609	136	5.56522
ENSG00000076641	PAG1	0.95	7	14	12	4	4	5	5	65	3	24	24	7	7	0.9	4	4	11.8688	15.7775	5.31	0.447393
ENSG00000085982	USP40	0.95	7	13	8	10	3	4	10	3	8	4	5	18	13	2	13	29	9.375	6.93662	1.03	0.109867
ENSG00000088038	CNOT3	0.95	10	15	8	7	6	3	8	17	3	11	23	19	16	7	29	14	12.25	7.28926	23	1.87755
ENSG00000099968	BCL2L13	0.95	32	20	27	29	17	30	26	35	13	16	14	22	30	69	21	40	27.5625	13.5054	22.2	0.805442
ENSG00000100478	AP4S1	0.95	3	11	12	4	5	3	4	7	1	4	6	15	9	2	8	15	6.8125	4.46047	1.99	0.29211
ENSG00000102804	TSC22D1	0.95	156	34	222	64	131	46	76	24	12	253	70	96	262	109	110	101	110.375	77.7491	6.29	0.0569875
ENSG00000103160	HSDL1	0.95	12	17	35	16	11	12	15	23	3	12	17	40	27	14	32	43	20.5625	11.5699	3.04	0.147842
ENSG00000103495	MAZ	0.95	15	16	10	12	15	4	8	31	7	15	32	30	23	21	14	19	17	8.53229	7.4	0.435294
ENSG00000103657	HERC1	0.95	14	16	25	14	11	15	9	32	4	13	18	20	16	19	19	27	17	6.90893	1.07	0.0629412
ENSG00000105221	AKT2	0.95	12	14	6	28	7	6	11	17	11	10	17	22	17	10	13	33	14.625	7.63217	15	1.02564
ENSG00000105612	DNASE2	0.95	31	47	20	39	23	9	22	64	32	33	43	44	49	12	23	64	34.6875	16.5276	8.58	0.247351
ENSG00000107201	DDX58	0.95	6	22	8	15	7	5	12	97	4	17	17	24	21	4	14	14	17.9375	22.071	13.9	0.774913
ENSG00000110237	ARHGEF17	0.95	20	26	21	18	14	12	19	0.2	1	24	20	29	30	4	20	22	17.5125	9.13979	1.65	0.0942184
ENSG00000110344	UBE4A	0.95	24	29	40	29	13	14	17	32	13	12	22	38	20	28	29	45	25.3125	10.2484	11.6	0.458272
ENSG00000110723	EXPH5	0.95	1	1	2	3	2	0.3	6	0.7	4	7	1	3	2	0.2	2	5	2.5125	2.04316	1.1	0.437811
ENSG00000113209	PCDHB5	0.95	3	4	10	2	3	2	4	0.2	0.3	3	1	19	8	0.4	8	12	4.99375	5.17873	0.235	0.0470588
ENSG00000113742	CPEB4	0.95	17	25	78	23	12	89	34	29	12	35	25	18	45	59	26	70	37.3125	24.1018	0.889	0.0238258
ENSG00000114353	GNAI2	0.95	200	167	62	96	78	25	39	381	26	241	119	115	119	24	72	67	114.438	94.994	257	2.24577
ENSG00000116016	EPAS1	0.95	787	345	112	350	238	125	237	2	81	3239	233	137	204	58	141	273	410.125	775.49	0.143	0.000348674
ENSG00000120008	WDR11	0.95	11	25	12	15	7	4	17	30	6	7	16	25	20	1	12	29	14.8125	8.98309	12.3	0.83038
ENSG00000122033	MTIF3	0.95	73	75	66	98	57	78	85	67	37	33	69	93	71	43	150	67	72.625	27.4685	2.36	0.0324957
ENSG00000122741	DCAF10	0.95	22	18	12	17	13	7	23	16	12	11	15	28	27	12	34	26	18.3125	7.56059	1.14	0.0622526
ENSG00000123815	COQ8B	0.95	5	10	7	5	3	3	7	8	5	7	9	12	11	2	9	11	7.125	3.0957	2.46	0.345263
ENSG00000123989	CHPF	0.95	10	14	22	14	11	21	19	3	37	28	26	103	25	12	63	49	28.5625	25.0758	1.01	0.0353611
ENSG00000125744	RTN2	0.95	3	4	14	8	5	4	2	3	0.8	3	4	2	9	76	4	7	9.3	18.0865	4.28	0.460215
ENSG00000125945	ZNF436	0.95	9	23	29	36	14	7	13	13	3	7	19	93	28	5	41	26	22.875	21.8963	0.359	0.015694
ENSG00000128294	TPST2	0.95	8	20	8	27	5	9	11	41	25	33	29	8	13	15	17	24	18.3125	10.5749	1.14	0.0622526
ENSG00000128829	EIF2AK4	0.95	16	17	11	14	9	5	10	16	6	8	13	28	16	6	13	24	13.25	6.35085	3.66	0.276226
ENSG00000130332	LSM7	0.95	22	67	16	22	19	5	15	32	9	20	39	48	29	10	43	31	26.6875	16.3492	61.2	2.29321
ENSG00000130818	ZNF426	0.95	7	12	11	11	7	5	8	11	1	6	8	29	14	2	11	16	9.9375	6.49583	0.1	0.0100629
ENSG00000131115	ZNF227	0.95	5	11	8	7	6	2	4	14	1	9	12	13	13	5	10	9	8.0625	4.0078	0.085	0.0105426
ENSG00000131375	CAPN7	0.95	24	24	15	27	19	13	23	26	11	25	21	50	44	18	34	59	27.0625	13.4336	3.22	0.118984
ENSG00000133116	KL	0.95	10	5	2	6	9	1	73	2	0.2	19	9	2	10	2	5	6	10.075	17.4489	0.222	0.0220347
ENSG00000134716	CYP2J2	0.95	0.4	0.3	16	2	5	27	0.8	0.7	54	3	1	0.8	14	5	5	5	8.75	14.1139	0.63	0.072
ENSG00000134884	ARGLU1	0.95	23	93	58	61	26	14	43	30	19	67	111	117	58	10	42	87	53.6875	34.0817	63.5	1.18277
ENSG00000135736	CCDC102A	0.95	3	8	0.4	5	7	2	4	6	0.5	5	14	13	21	1	13	5	6.74375	5.78365	0.745	0.110473
ENSG00000136869	TLR4	0.95	74	40	15	29	17	10	20	243	10	32	32	15	17	5	7	20	36.625	57.5348	0.267	0.0072901
ENSG00000137575	SDCBP	0.95	273	196	117	188	187	68	111	533	42	433	263	157	192	39	123	150	192	133.477	35.7	0.185938
ENSG00000139343	SNRPF	0.95	21	47	18	18	20	7	18	29	21	23	28	42	26	5	32	35	24.375	11.1766	504	20.6769
ENSG00000141574	SECTM1	0.95	10	19	1	6	9	2	11	123	1	30	12	15	15	2	6	3	16.5625	29.4255	34	2.05283
ENSG00000143418	CERS2	0.95	52	39	49	35	37	17	96	107	180	93	78	83	90	14	36	70	67.25	41.8943	9.74	0.144833
ENSG00000143493	INTS7	0.95	4	11	3	10	6	4	8	14	5	4	14	16	10	6	38	16	10.5625	8.57103	4.33	0.409941
ENSG00000145029	NICN1	0.95	6	15	30	14	7	8	16	12	3	11	20	21	16	4	18	19	13.75	7.17867	0	0
ENSG00000145241	CENPC	0.95	5	15	9	10	5	3	7	13	2	7	7	19	18	2	14	26	10.125	6.8593	2.47	0.243951
ENSG00000147592	LACTB2	0.95	10	15	18	24	9	19	79	14	59	11	14	14	19	11	69	30	25.9375	22.3263	40.7	1.56916
ENSG00000147912	FBXO10	0.95	0.9	6	3	2	2	0.7	3	0.8	1	1	5	4	3	8	9	5	3.4	2.59461	0.015	0.00441176
ENSG00000152223	EPG5	0.95	5	7	6	7	4	6	7	20	2	10	11	11	10	6	10	15	8.5625	4.42672	0.238	0.0277956
ENSG00000152240	HAUS1	0.95	16	26	8	12	12	4	13	24	6	12	20	27	32	2	30	20	16.5	9.40213	3.18	0.192727
ENSG00000152433	ZNF547	0.95	0.6	2	2	2	1	1	2	2	0.3	1	6	4	3	0.9	4	2	2.1125	1.50239	0.593	0.28071
ENSG00000152763	WDR78	0.95	0.9	2	2	1	1	0.6	4	0.5	0.3	13	2	15	2	0.1	39	4	5.4625	9.96359	0.328	0.0600458
ENSG00000153283	CD96	0.95	0.9	13	0.2	1	0.7	0.2	0.5	84	0.8	9	21	2	2	0.2	0.9	2	8.65	20.922	0.016	0.00184971
ENSG00000153707	PTPRD	0.95	1	3	87	1	3	3	14	0.1	3	9	2	30	4	0.5	7	7	10.9125	21.5977	0.773	0.0708362
ENSG00000157181	C1orf27	0.95	10	16	20	20	14	8	29	16	19	20	22	30	36	5	22	41	20.5	9.72968	4.89	0.238537
ENSG00000157193	LRP8	0.95	1	6	11	0.8	1	0.6	2	2	0.2	2	4	3	0.8	0.3	14	21	4.35625	5.95057	2.07	0.475179
ENSG00000157315	TMED6	0.95	0.8	5	1	1	2	0.6	6	2	8	1	2	7	1	0.3	3	2	2.66875	2.45132	0.055	0.0206089
ENSG00000157978	LDLRAP1	0.95	6	19	10	13	6	2	11	60	10	15	43	19	12	5	12	13	16	14.9399	5.57	0.348125
ENSG00000160688	FLAD1	0.95	15	22	9	16	5	6	12	15	11	10	19	14	14	13	16	19	13.5	4.6188	8.19	0.606667
ENSG00000162378	ZYG11B	0.95	32	24	61	41	25	41	24	31	15	21	22	44	45	130	38	48	40.125	26.8871	0.826	0.0205857
ENSG00000162517	PEF1	0.95	61	80	54	55	45	18	62	78	34	104	72	99	110	44	68	154	71.125	33.3984	97.1	1.3652
ENSG00000163884	KLF15	0.95	20	3	14	15	14	32	30	0.2	45	8	22	9	38	33	9	37	20.575	13.6961	0.89	0.0432564
ENSG00000164118	CEP44	0.95	8	8	7	9	6	3	8	7	2	5	11	17	15	2	13	12	8.3125	4.40785	1.48	0.178045
ENSG00000164576	SAP30L	0.95	22	19	28	22	29	15	21	41	8	21	32	63	42	17	32	25	27.3125	13.0778	2.15	0.0787185
ENSG00000164751	PEX2	0.95	13	21	23	23	15	12	23	35	11	20	22	25	38	10	21	39	21.9375	9.0441	0.131	0.00597151
ENSG00000165272	AQP3	0.95	5	28	1	13	8	8	201	78	121	278	53	49	155	2	9	6	63.4375	83.4601	0.566	0.00892217
ENSG00000165280	VCP	0.95	156	180	120	142	73	86	112	179	99	148	116	159	143	184	150	205	140.75	37.339	766	5.44227
ENSG00000165527	ARF6	0.95	113	167	53	103	69	25	86	320	47	127	158	115	108	48	97	84	107.5	68.9531	60.6	0.563721
ENSG00000165997	ARL5B	0.95	20	13	16	16	14	7	13	17	17	46	23	25	24	6	19	15	18.1875	9.123	0.427	0.0234777
ENSG00000166170	BAG5	0.95	50	48	59	55	25	12	40	55	11	32	39	66	40	16	128	72	46.75	28.4968	5.31	0.113583
ENSG00000166432	ZMAT1	0.95	3	10	8	7	2	2	6	2	0.8	4	5	18	12	0.8	5	19	6.5375	5.67132	0.192	0.029369
ENSG00000166788	SAAL1	0.95	6	18	9	9	4	3	5	9	3	4	10	13	13	4	22	14	9.125	5.65538	10.8	1.18356
ENSG00000167741	GGT6	0.95	0.4	0.8	0.4	3	4	0.3	21	0.2	0.5	6	0.5	4	16	0.2	3	1	3.83125	6.05956	0.648	0.169135
ENSG00000168653	NDUFS5	0.95	421	859	816	640	591	766	495	330	267	521	273	920	740	644	498	1045	614.125	232.69	54.1	0.0880928
ENSG00000168939	SPRY3	0.95	2	3	1	2	0.5	0.8	0.8	0.6	0.3	0.7	1	3	0.9	0.6	2	1	1.2625	0.861684	0.101	0.08
ENSG00000169016	E2F6	0.95	11	17	13	11	7	12	11	10	6	11	14	26	16	13	26	25	14.3125	6.27926	0.952	0.0665153
ENSG00000169057	MECP2	0.95	17	28	19	9	10	5	8	18	2	13	16	30	20	7	13	17	14.5	7.74597	16.2	1.11724
ENSG00000171223	JUNB	0.95	231	352	32	286	103	18	51	410	74	584	192	280	278	66	79	265	206.312	159.287	6.41	0.0310694
ENSG00000171940	ZNF217	0.95	50	40	5	36	15	5	27	199	14	35	39	31	37	5	59	22	38.6875	45.6913	1.35	0.034895
ENSG00000171970	ZNF57	0.95	2	6	4	3	2	3	6	5	2	3	3	10	7	1	17	11	5.3125	4.23822	0.054	0.0101647
ENSG00000173868	PHOSPHO1	0.95	0.5	3	3	2	0.8	0.1	0.4	40	0.4	8	2	0.5	0.4	0.9	28	0.9	5.68125	11.4334	0.157	0.0276348
ENSG00000174231	PRPF8	0.95	76	81	62	46	47	33	45	144	24	74	82	154	110	122	102	106	81.75	38.7668	95.7	1.17064
ENSG00000176225	RTTN	0.95	2	5	2	2	2	2	2	5	1	1	4	6	6	1	8	4	3.3125	2.15155	0.116	0.0350189
ENSG00000177125	ZBTB34	0.95	10	8	7	9	4	3	7	33	2	9	14	11	7	4	8	8	9	7.0993	0.109	0.0121111
ENSG00000178385	PLEKHM3	0.95	4	3	6	3	1	2	0.7	5	1	2	2	2	2	1	3	5	2.66875	1.6028	0.166	0.0622014
ENSG00000181804	SLC9A9	0.95	13	21	17	16	13	4	3	29	2	12	32	19	48	4	10	10	15.8125	12.2268	2.22	0.140395
ENSG00000182149	IST1	0.95	43	70	40	47	34	15	45	95	13	61	67	77	56	15	54	64	49.75	23.1934	8.18	0.164422
ENSG00000182149	IST1	0.95	43	70	40	47	34	15	45	95	13	61	67	77	56	15	54	64	49.75	23.1934	105	2.11055
ENSG00000182636	NDN	0.95	66	85	109	124	50	19	29	1	4	33	45	205	87	5	126	43	64.4375	55.7255	0.179	0.00277789
ENSG00000183020	AP2A2	0.95	18	19	26	18	12	6	21	14	10	17	24	27	24	9	26	13	17.75	6.61816	36.2	2.03944
ENSG00000183283	DAZAP2	0.95	116	204	138	87	73	62	152	570	57	212	128	122	164	50	96	214	152.812	123.587	0.214	0.00140041
ENSG00000184445	KNTC1	0.95	2	8	2	3	1	0.8	2	3	0.4	2	7	4	2	0.3	22	2	3.84375	5.29465	3.48	0.905366
ENSG00000184867	ARMCX2	0.95	13	16	20	13	24	10	37	3	0.8	32	29	86	77	2	32	71	29.1125	26.7669	2.84	0.0975526
ENSG00000186532	SMYD4	0.95	8	11	5	8	6	3	4	7	2	5	9	10	12	9	8	10	7.3125	2.91476	0.282	0.0385641
ENSG00000188171	ZNF626	0.95	2	7	5	5	2	2	6	7	0.6	2	6	15	13	1	6	14	5.85	4.58839	0.112	0.0191453
ENSG00000188215	DCUN1D3	0.95	34	16	9	45	9	5	11	7	8	15	14	21	18	3	17	11	15.1875	10.8703	0.728	0.0479342
ENSG00000188305	PEAK3	0.95	1	6	0.6	2	0.1	0.2	0.9	16	0.2	0.4	0.7	0.6	0.4	0.1	0.7	0.6	1.90625	4.01787	0.254	0.133246
ENSG00000189190	ZNF600	0.95	3	10	0.7	3	3	0.8	3	9	0.7	2	6	7	7	0.1	3	6	4.01875	3.09003	0.036	0.00895801
ENSG00000196378	ZNF34	0.95	5	13	11	8	5	2	4	8	1	10	10	19	21	4	16	16	9.5625	6.0879	0.057	0.00596078
ENSG00000196569	LAMA2	0.95	68	8	6	17	86	56	17	0.8	3	35	51	40	38	22	80	50	36.1125	27.364	6.89	0.190793
ENSG00000196812	ZSCAN16	0.95	3	18	4	8	6	1	10	15	4	5	14	9	8	1	11	12	8.0625	5.05264	0.284	0.0352248
ENSG00000197181	PIWIL2	0.95	1	2	1	2	2	0.3	0.4	0.3	0.8	0.5	1	3	3	3	69	2	5.70625	16.9061	0.199	0.034874
ENSG00000197782	ZNF780A	0.95	3	8	4	5	3	2	6	17	3	2	11	15	9	1	7	10	6.625	4.7592	0.066	0.00996226
ENSG00000197937	ZNF347	0.95	7	10	4	6	4	2	5	3	2	5	4	13	8	2	5	9	5.5625	3.14046	0.081	0.0145618
ENSG00000198342	ZNF442	0.95	1	2	2	2	0.8	0.2	2	1	0.7	0.7	2	12	2	0.4	2	2	2.05	2.73959	0.141	0.0687805
ENSG00000198380	GFPT1	0.95	115	30	28	70	40	18	55	18	27	52	37	66	42	18	87	57	47.5	27.1367	114	2.4
ENSG00000198574	SH2D1B	0.95	0.5	2	2	0.6	0.4	0.2	0.4	74	0.5	9	2	0.2	0.3	0.4	0.2	0.1	5.8	18.3163	0.244	0.042069
ENSG00000198863	RUNDC1	0.95	9	22	24	13	6	4	15	27	3	9	14	27	18	9	12	24	14.75	8.06226	1.39	0.0942373
ENSG00000198961	PJA2	0.95	124	127	586	117	180	66	134	214	46	170	122	246	322	63	176	195	180.5	129.327	0.844	0.0046759
ENSG00000204444	APOM	0.95	1	8	2	3	0.6	0.7	29	3	97	0.8	1	4	4	0.9	9	6	10.625	24.0597	637	59.9529
ENSG00000204469	PRRC2A	0.95	59	68	50	33	34	22	31	76	12	58	59	133	62	46	145	59	59.1875	35.7439	22.8	0.385216
ENSG00000214160	ALG3	0.95	13	20	3	12	8	4	12	19	35	12	25	14	25	12	16	14	15.25	8.15271	1.29	0.0845902
ENSG00000214530	STARD10	0.95	4	15	9	9	37	10	13	7	96	20	16	18	22	10	54	27	22.9375	23.2335	26.4	1.15095
ENSG00000239264	TXNDC5	0.95	4	10	0.6	2	1	0.5	2	2	2	3	17	5	2	0.4	2	4	3.59375	4.27496	111	30.887
ENSG00000251192	ZNF674	0.95	1	3	3	2	1	1	2	3	0.8	1	1	4	3	0.9	3	3	2.04375	1.0838	0.247	0.120856
ENSG00000005379	TSPOAP1	0.94	0.2	4	13	2	0.9	0.8	2	2	0.2	4	5	11	6	0.4	1	7	3.71875	3.87663	0.068	0.0182857
ENSG00000005448	WDR54	0.94	6	13	17	4	5	0.8	6	8	1	16	10	18	10	0.4	24	7	9.1375	6.86002	1.53	0.167442
ENSG00000006007	GDE1	0.94	40	43	67	76	45	53	44	79	23	49	39	48	70	23	49	68	51	16.9666	1.7	0.0333333
ENSG00000009413	REV3L	0.94	32	16	9	11	10	5	7	15	3	13	13	19	19	10	18	17	13.5625	6.9279	0.262	0.019318
ENSG00000014216	CAPN1	0.94	26	41	20	26	20	9	35	65	17	29	32	50	51	28	21	47	32.3125	14.9386	243	7.52031
ENSG00000024862	CCDC28A	0.94	26	36	49	33	38	7	37	73	22	53	39	23	61	7	45	97	40.375	23.2633	0.648	0.0160495
ENSG00000061273	HDAC7	0.94	21	37	6	16	14	4	10	21	1	41	32	36	22	2	11	26	18.75	12.9538	3.97	0.211733
ENSG00000064300	NGFR	0.94	13	84	2	10	13	5	7	0.4	6	6	65	11	33	0.9	51	16	20.2063	25.039	2.33	0.115311
ENSG00000066044	ELAVL1	0.94	24	29	20	22	20	13	23	38	12	32	41	47	45	22	51	27	29.125	12.0215	323	11.0901
ENSG00000069974	RAB27A	0.94	17	33	5	9	27	3	17	160	25	66	43	26	32	2	14	37	32.25	37.9201	31.6	0.979845
ENSG00000073910	FRY	0.94	7	14	10	8	6	18	7	11	2	10	8	7	22	3	9	8	9.375	5.08429	0.172	0.0183467
ENSG00000088888	MAVS	0.94	47	51	19	48	26	23	33	38	16	21	39	58	35	58	23	61	37.25	15.1283	45.8	1.22953
ENSG00000090020	SLC9A1	0.94	14	18	16	14	12	5	11	22	1	21	13	20	21	3	17	14	13.875	6.38618	7.14	0.514595
ENSG00000090581	GNPTG	0.94	16	32	32	25	13	5	21	26	15	21	26	25	30	10	22	31	21.875	8.1476	20.9	0.955429
ENSG00000099860	GADD45B	0.94	97	120	97	42	80	20	73	40	75	521	109	78	102	27	52	313	115.375	127.165	0.053	0.000459372
ENSG00000100325	ASCC2	0.94	26	32	8	25	13	7	15	30	18	19	18	31	31	37	32	36	23.625	9.73567	12.1	0.512169
ENSG00000100342	APOL1	0.94	54	90	13	43	54	16	55	45	47	219	52	123	152	12	64	41	67.5	55.0055	306	4.53333
ENSG00000100348	TXN2	0.94	51	78	61	70	40	45	71	68	74	55	59	104	96	56	68	119	69.6875	21.3377	20	0.286996
ENSG00000100412	ACO2	0.94	44	42	93	70	25	173	66	41	22	31	31	34	51	183	37	103	65.375	49.7244	317	4.84895
ENSG00000100744	GSKIP	0.94	7	13	24	11	10	5	19	31	15	11	16	13	22	2	25	14	14.875	7.75349	6.86	0.461176
ENSG00000101473	ACOT8	0.94	3	8	10	5	5	3	7	7	5	7	9	18	12	11	9	11	8.125	3.82753	5.82	0.716308
ENSG00000102218	RP2	0.94	21	24	6	22	14	5	16	122	9	24	22	22	16	2	19	15	22.4375	27.4638	8.99	0.400669
ENSG00000102547	CAB39L	0.94	50	10	70	31	67	14	17	8	2	53	18	28	74	3	43	21	31.8125	24.4982	7.65	0.240472
ENSG00000102897	LYRM1	0.94	24	40	24	44	32	24	29	22	42	23	31	46	56	19	51	36	33.9375	11.3986	1.63	0.0480295
ENSG00000104951	IL4I1	0.94	1	13	1	2	0.1	0.2	3	1	0.1	5	1	4	1	0.1	26	0.2	3.66875	6.77621	44.8	12.2112
ENSG00000105671	DDX49	0.94	14	25	11	14	11	5	14	23	11	11	16	19	20	22	29	21	16.625	6.38618	2.04	0.122707
ENSG00000105677	TMEM147	0.94	56	83	31	45	36	25	64	42	39	60	72	79	90	69	72	103	60.375	22.6123	0.513	0.00849689
ENSG00000105808	RASA4	0.94	4	20	9	7	4	1	4	9	0.2	5	8	9	13	11	4	4	7.0125	4.93449	0.334	0.0476292
ENSG00000106617	PRKAG2	0.94	17	24	24	12	13	36	18	32	10	12	15	14	46	2	26	34	20.9375	11.5497	1.51	0.0721194
ENSG00000107854	TNKS2	0.94	38	55	45	42	30	13	29	101	14	54	48	84	61	28	46	68	47.25	23.615	0.203	0.0042963
ENSG00000108854	SMURF2	0.94	14	18	12	20	14	5	12	18	2	31	18	26	21	5	33	27	17.25	9.09579	0.785	0.0455072
ENSG00000110080	ST3GAL4	0.94	9	16	17	9	16	7	17	10	15	22	14	65	34	0.9	35	6	18.3062	15.4637	1.05	0.0573575
ENSG00000110619	CARS	0.94	9	22	18	15	6	2	8	16	6	14	13	25	14	23	15	23	14.3125	6.83831	46.9	3.27686
ENSG00000110955	ATP5B	0.94	365	483	762	593	409	1574	1059	618	418	454	394	461	693	654	489	902	645.5	315.122	2925	4.53137
ENSG00000111321	LTBR	0.94	22	35	4	25	20	5	26	23	50	36	25	31	40	15	18	37	25.75	12.3045	0.438	0.0170097
ENSG00000113719	ERGIC1	0.94	25	31	10	27	23	12	26	43	65	36	35	35	39	27	23	49	31.625	13.569	84.6	2.6751
ENSG00000114302	PRKAR2A	0.94	56	37	24	57	26	30	38	51	21	24	28	62	45	95	62	57	44.5625	19.9431	57.1	1.28135
ENSG00000114859	CLCN2	0.94	0.8	2	5	0.6	0.5	0.4	2	0.4	0.8	0.5	2	5	3	0.3	7	4	2.14375	2.08198	0.298	0.139009
ENSG00000115216	NRBP1	0.94	42	54	37	34	31	14	31	68	20	44	57	87	59	52	92	62	49	21.8754	22.9	0.467347
ENSG00000115414	FN1	0.94	67	54	35	87	163	39	41	0.4	270	836	70	183	276	13	111	37	142.65	203.405	605	4.24115
ENSG00000115425	PECR	0.94	22	5	3	36	6	1	15	11	27	7	5	7	10	1	4	15	10.9375	9.92283	4.34	0.3968
ENSG00000115468	EFHD1	0.94	82	30	260	53	36	14	162	0.4	37	20	37	68	29	27	78	61	62.15	64.861	20.6	0.331456
ENSG00000115524	SF3B1	0.94	65	150	77	75	61	43	77	122	33	127	156	153	128	46	96	168	98.5625	44.8196	152	1.54217
ENSG00000116213	WRAP73	0.94	1	7	1	2	2	1	3	6	1	3	9	4	4	2	4	4	3.375	2.33452	0.25	0.0740741
ENSG00000116675	DNAJC6	0.94	4	1	240	2	8	3	6	1	0.1	4	3	1	5	0.3	3	2	17.7125	59.3158	0.633	0.0357375
ENSG00000116991	SIPA1L2	0.94	31	10	20	8	27	57	6	7	4	33	13	45	13	8	20	19	20.0625	15.1458	0.717	0.0357383
ENSG00000117010	ZNF684	0.94	2	7	5	5	3	2	14	3	9	3	5	7	5	0.8	5	6	5.1125	3.19831	0.046	0.00899756
ENSG00000117118	SDHB	0.94	38	67	57	62	31	124	99	85	128	57	53	48	79	89	69	80	72.875	27.6716	103	1.41338
ENSG00000118363	SPCS2	0.94	50	101	76	62	91	23	104	104	71	88	147	124	114	31	119	134	89.9375	35.7649	52.8	0.587074
ENSG00000119318	RAD23B	0.94	143	109	135	244	129	62	89	137	113	142	104	188	170	175	195	199	145.875	46.931	329	2.25536
ENSG00000119397	CNTRL	0.94	4	18	4	5	2	1	2	20	0.9	6	9	15	8	0.7	50	8	9.6	12.347	0.371	0.0386458
ENSG00000122406	RPL5	0.94	736	1185	324	652	949	201	402	1500	227	1134	1154	2510	1913	300	889	1105	948.812	640.567	1083	1.14143
ENSG00000122547	EEPD1	0.94	14	9	7	20	7	2	3	15	5	4	5	11	9	20	8	11	9.375	5.53624	1.12	0.119467
ENSG00000122694	GLIPR2	0.94	49	59	27	95	46	4	8	285	2	84	26	70	59	4	32	28	54.875	67.7337	88	1.60364
ENSG00000122779	TRIM24	0.94	12	12	12	8	5	5	11	15	8	6	6	69	12	13	28	14	14.75	15.4941	3.57	0.242034
ENSG00000123405	NFE2	0.94	2	0.1	0.4	0.6	0.7	0.3	0.2	151	0.9	18	6	0.2	0.6	0.4	1	2	11.525	37.4587	0.231	0.0200434
ENSG00000123610	TNFAIP6	0.94	4	2	4	29	7	3	0.3	23	1	69	7	0.9	16	0.5	19	2	11.7312	17.6922	1.19	0.101438
ENSG00000124207	CSE1L	0.94	50	73	86	56	57	35	60	67	21	54	60	124	101	69	279	80	79.5	58.5013	235	2.95597
ENSG00000124688	MAD2L1BP	0.94	6	20	10	9	7	12	17	35	10	11	16	19	14	9	14	24	14.5625	7.38439	2.66	0.182661
ENSG00000125844	RRBP1	0.94	78	86	34	56	40	9	62	26	94	79	70	120	56	8	72	81	60.6875	30.9488	90.1	1.48465
ENSG00000125846	ZNF133	0.94	3	11	6	7	4	2	4	2	2	4	6	11	12	4	8	11	6.0625	3.54906	0.482	0.0795052
ENSG00000126767	ELK1	0.94	18	24	29	11	9	9	11	26	15	19	22	80	15	20	36	36	23.75	17.2878	0.643	0.0270737
ENSG00000130517	PGPEP1	0.94	21	22	13	16	13	10	20	17	17	16	27	34	20	16	14	23	18.6875	5.95224	2.19	0.117191
ENSG00000130592	LSP1	0.94	19	63	2	22	5	3	1	332	0.7	20	32	10	20	2	13	7	34.4813	80.9116	342	9.91843
ENSG00000130940	CASZ1	0.94	1	1	0.2	3	3	3	3	1	0.3	5	1	1	9	7	2	3	2.71875	2.46122	0.757	0.278437
ENSG00000131094	C1QL1	0.94	0.1	0.2	13	0.4	3	1	7	0.2	0.2	0.1	1	0.5	4	0.3	2	0.5	2.09375	3.46169	0.52	0.248358
ENSG00000131238	PPT1	0.94	72	162	169	84	79	27	88	403	24	153	119	179	184	14	102	139	124.875	92.6037	778	6.23023
ENSG00000131467	PSME3	0.94	49	69	45	52	32	20	64	103	32	35	42	92	54	31	68	90	54.875	24.3827	246	4.48292
ENSG00000131477	RAMP2	0.94	146	155	11	88	24	17	24	0.1	6	149	57	55	60	14	32	48	55.3813	52.4142	0.226	0.0040808
ENSG00000134909	ARHGAP32	0.94	4	3	55	6	5	0.9	6	4	2	7	3	17	6	2	14	6	8.80625	13.0282	1.08	0.12264
ENSG00000135052	GOLM1	0.94	28	39	145	34	56	6	114	41	20	28	30	102	61	6	54	71	52.1875	39.1241	26	0.498204
ENSG00000135722	FBXL8	0.94	2	5	1	2	0.8	0.7	2	2	1	3	3	4	3	1	1	4	2.21875	1.32575	0.636	0.286648
ENSG00000135775	COG2	0.94	5	14	7	5	4	5	9	13	3	3	7	13	11	8	12	14	8.3125	4.01196	4.83	0.581053
ENSG00000135919	SERPINE2	0.94	18	20	65	4	21	4	17	1	0.7	8	21	123	16	0.2	54	16	24.3062	31.9602	18.2	0.748779
ENSG00000136280	CCM2	0.94	6	18	10	12	6	3	6	28	14	11	22	9	9	7	12	6	11.1875	6.62539	2.59	0.231508
ENSG00000137076	TLN1	0.94	205	182	38	178	175	62	79	411	30	189	141	174	346	113	117	116	159.75	101.979	1037	6.49139
ENSG00000137168	PPIL1	0.94	9	48	41	20	20	63	43	26	40	21	45	72	43	9	59	53	38.25	19.0105	51.8	1.35425
ENSG00000138162	TACC2	0.94	8	6	6	14	11	30	15	0.1	2	18	3	8	33	136	7	64	22.5688	34.2145	3.09	0.136915
ENSG00000138623	SEMA7A	0.94	1	31	49	1	0.9	0.4	0.6	4	0.2	29	11	13	3	0.4	34	1	11.2188	15.6307	46.4	4.13593
ENSG00000139618	BRCA2	0.94	0.7	2	0.5	0.9	0.3	0.2	0.4	1	0.2	0.5	2	0.8	0.4	0.2	7	0.7	1.1125	1.66648	0.331	0.297528
ENSG00000139697	SBNO1	0.94	14	21	25	18	12	9	16	48	8	12	22	32	21	20	97	41	26	21.9119	9.63	0.370385
ENSG00000140521	POLG	0.94	20	28	14	18	14	9	17	33	8	21	44	19	20	19	11	20	19.6875	9.09739	1.96	0.0995556
ENSG00000141485	SLC13A5	0.94	0.7	2	3	0.6	0.3	0.1	0.4	0.3	140	0.5	0.7	2	0.5	0.1	1	0.6	9.55	34.7959	0.073	0.00764398
ENSG00000144792	ZNF660	0.94	2	4	3	2	0.8	0.5	1	0.8	0.1	0.6	2	10	5	0.1	3	7	2.61875	2.74693	0.156	0.0595704
ENSG00000145016	RUBCN	0.94	13	24	19	8	7	5	7	28	2	17	30	17	13	5	21	11	14.1875	8.54181	0.682	0.0480705
ENSG00000145244	CORIN	0.94	0.2	0.4	0.2	0.5	0.5	25	2	0.1	0.2	1	0.3	0.4	0.7	0.1	4	0.5	2.25625	6.14459	0.297	0.131634
ENSG00000147535	PLPP5	0.94	13	24	11	13	6	4	18	17	17	21	40	29	25	2	12	16	16.75	9.6988	0.073	0.00435821
ENSG00000149541	B3GAT3	0.94	12	39	21	12	15	2	17	22	11	21	30	37	21	4	23	21	19.25	10.2665	12.3	0.638961
ENSG00000151090	THRB	0.94	12	6	33	22	24	6	11	0.4	7	8	9	4	32	11	5	11	12.5875	9.83883	0.342	0.0271698
ENSG00000151292	CSNK1G3	0.94	24	22	25	25	21	8	19	25	11	28	26	42	37	7	39	25	24	9.97998	1.16	0.0483333
ENSG00000153767	GTF2E1	0.94	14	17	10	14	7	4	8	28	4	5	12	23	11	4	32	17	13.125	8.5703	10.7	0.815238
ENSG00000157538	DSCR3	0.94	10	14	9	11	7	9	15	31	8	10	16	14	18	15	10	15	13.25	5.74456	4.47	0.337358
ENSG00000160808	MYL3	0.94	3	3	7	46	0.6	2989	14	1	1	4	3	4	2	45	5	83	200.662	743.919	47.3	0.235719
ENSG00000161021	MAML1	0.94	12	15	5	8	8	3	7	31	3	13	17	23	16	6	10	13	11.875	7.49111	1.46	0.122947
ENSG00000161970	RPL26	0.94	306	520	209	308	483	116	225	773	144	631	651	708	873	324	376	320	435.438	233.614	368	0.845127
ENSG00000162144	CYB561A3	0.94	5	16	2	10	4	1	5	20	4	6	14	15	6	3	6	6	7.6875	5.60617	0.123	0.016
ENSG00000163466	ARPC2	0.94	84	155	54	80	62	34	69	312	26	148	124	101	112	55	106	78	100	67.6008	798	7.98
ENSG00000163945	UVSSA	0.94	3	6	3	3	0.8	2	2	5	1	2	3	5	4	1	4	4	3.05	1.54488	0.406	0.133115
ENSG00000164008	C1orf50	0.94	7	10	8	8	7	5	10	10	7	8	11	12	18	7	21	10	9.9375	4.18678	6.11	0.614843
ENSG00000164946	FREM1	0.94	0.5	0.9	1	9	1	0.9	7	0.1	0.1	3	0.6	3	4	0.6	4	0.7	2.275	2.61139	0.01	0.0043956
ENSG00000165457	FOLR2	0.94	64	43	5	52	7	17	10	13	11	42	46	12	59	6	20	12	26.1875	20.8398	4.9	0.187112
ENSG00000166228	PCBD1	0.94	51	43	28	37	73	45	83	16	268	56	72	65	169	39	35	87	72.9375	62.8379	46.2	0.633419
ENSG00000166750	SLFN5	0.94	34	41	9	29	16	5	8	132	3	44	27	27	30	47	8	20	30	30.6638	27.4	0.913333
ENSG00000167553	TUBA1C	0.94	9	16	3	10	8	3	26	10	10	19	10	16	8	4	10	18	11.25	6.27694	799	71.0222
ENSG00000167670	CHAF1A	0.94	3	9	7	8	2	1	2	6	1	2	5	5	6	10	19	6	5.75	4.52401	4.83	0.84
ENSG00000167925	GHDC	0.94	17	29	11	12	8	2	15	20	6	12	24	19	21	6	11	33	15.375	8.60136	2.66	0.173008
ENSG00000168781	PPIP5K1	0.94	3	5	8	6	2	1	5	2	1	3	4	6	11	6	7	7	4.8125	2.76209	1.32	0.274286
ENSG00000169962	TAS1R3	0.94	0.1	3	0.2	0.1	0.1	0.3	0.1	0.2	1	0.1	5	0.5	0.4	0.2	5	0.3	1.0375	1.70367	0.152	0.146506
ENSG00000169972	PUSL1	0.94	3	3	2	2	1	1	2	3	2	5	3	5	5	2	4	2	2.8125	1.32759	0.794	0.282311
ENSG00000170190	SLC16A5	0.94	6	5	0.4	4	2	2	34	12	1	25	3	12	12	5	3	12	8.65	9.27002	0.197	0.0227746
ENSG00000170382	LRRN2	0.94	0.6	4	6	1	2	0.8	7	0.6	0.2	0.8	5	8	2	0.2	2	3	2.7	2.54873	0.131	0.0485185
ENSG00000170871	KIAA0232	0.94	19	18	62	24	13	39	30	35	8	22	13	46	26	32	30	41	28.625	13.9613	0.148	0.00517031
ENSG00000171443	ZNF524	0.94	15	15	2	14	15	4	7	25	5	9	16	9	21	14	8	16	12.1875	6.26332	1.55	0.127179
ENSG00000171466	ZNF562	0.94	4	12	8	9	5	4	8	10	3	8	9	16	11	2	7	11	7.9375	3.71427	0.073	0.00919685
ENSG00000171476	HOPX	0.94	0.9	8	31	1	4	2	2	18	0.3	111	7	6	11	0.3	17	65	17.7812	29.8409	1.49	0.0837961
ENSG00000172380	GNG12	0.94	168	133	35	191	90	43	141	0.1	26	166	99	176	241	17	128	122	111.006	70.6814	70.6	0.636
ENSG00000172409	CLP1	0.94	6	15	4	8	4	3	9	22	6	5	8	9	7	6	11	11	8.375	4.77319	1.43	0.170746
ENSG00000174327	SLC16A13	0.94	3	6	0.4	2	2	0.6	5	6	38	5	4	3	3	0.2	1	4	5.2	8.95142	0.507	0.0975
ENSG00000174371	EXO1	0.94	0.2	1	0.4	0.3	0.3	0.2	0.3	0.7	0.1	0.5	1	0.4	0.1	0.1	7	0.4	0.8125	1.67407	0.593	0.729846
ENSG00000174437	ATP2A2	0.94	35	51	145	59	43	430	59	36	37	77	55	64	91	363	92	244	117.562	121.434	87.7	0.745986
ENSG00000175595	ERCC4	0.94	3	6	7	5	3	3	4	11	2	1	7	13	7	5	9	6	5.75	3.25576	1.39	0.241739
ENSG00000177600	RPLP2	0.94	1200	1503	144	899	573	116	272	1522	227	968	1312	1245	1158	810	526	557	814.5	482.324	685	0.841007
ENSG00000182973	CNOT10	0.94	9	16	8	11	9	5	12	25	7	7	12	28	17	9	57	18	15.625	12.8056	7.68	0.49152
ENSG00000184451	CCR10	0.94	0.8	3	2	2	0.6	0.3	0.4	2	0.1	2	3	4	1	0.3	0.6	0.5	1.4125	1.18427	1.08	0.764602
ENSG00000184634	MED12	0.94	27	22	8	16	10	7	10	32	3	16	28	42	27	17	24	20	19.3125	10.4736	1.6	0.0828479
ENSG00000185115	NSMCE3	0.94	25	53	32	34	22	14	37	71	14	34	61	83	49	18	81	52	42.5	22.7391	2.47	0.0581176
ENSG00000185669	SNAI3	0.94	0.7	4	2	1	0.2	2	0.5	17	0.3	2	10	3	2	3	2	1	3.16875	4.36054	0.288	0.0908876
ENSG00000186468	RPS23	0.94	359	641	239	238	498	122	207	828	129	471	618	1039	866	443	360	391	465.562	271.476	264	0.567056
ENSG00000187792	ZNF70	0.94	4	8	3	4	2	1	3	2	0.8	2	3	26	6	4	6	5	4.9875	5.93092	0.012	0.00240602
ENSG00000188522	FAM83G	0.94	1	2	0.4	2	2	0.6	3	3	4	4	4	2	2	8	2	7	2.9375	2.10488	0.682	0.23217
ENSG00000189221	MAOA	0.94	252	21	31	234	145	63	219	0.4	73	91	45	24	210	186	28	322	121.525	101.882	68.7	0.565316
ENSG00000196126	HLA-DRB1	0.94	394	1086	148	354	119	89	373	1786	30	2457	301	312	172	80	167	246	507.125	686.446	63.1	0.124427
ENSG00000196396	PTPN1	0.94	39	85	31	25	20	24	69	99	14	88	70	46	40	16	41	68	48.4375	27.626	123	2.53935
ENSG00000196954	CASP4	0.94	15	36	2	13	10	4	9	79	7	47	31	23	14	2	7	8	19.1875	20.4979	2.74	0.142801
ENSG00000197077	KIAA1671	0.94	6	9	11	16	6	3	9	3	11	11	7	18	18	13	12	25	11.125	5.9203	1.3	0.116854
ENSG00000197119	SLC25A29	0.94	3	6	7	4	3	2	16	5	2	15	7	12	12	1	6	31	8.25	7.65506	1.16	0.140606
ENSG00000197779	ZNF81	0.94	2	3	2	2	1	2	3	5	0.7	2	5	7	2	0.5	3	3	2.7	1.71464	0.011	0.00407407
ENSG00000198742	SMURF1	0.94	28	24	20	17	18	7	14	12	6	28	24	26	27	9	44	15	19.9375	9.81474	1.06	0.0531661
ENSG00000203705	TATDN3	0.94	13	17	22	14	5	11	17	19	5	7	8	12	13	9	14	21	12.9375	5.32252	2.1	0.162319
ENSG00000203965	EFCAB7	0.94	1	4	8	4	3	2	4	2	0.6	3	3	9	7	9	22	9	5.6625	5.23665	0.416	0.0734658
ENSG00000204256	BRD2	0.94	58	103	59	46	46	21	65	126	28	115	136	135	117	44	144	130	85.8125	43.5113	20.2	0.235397
ENSG00000204580	DDR1	0.94	8	4	66	14	8	4	30	1	0.7	29	5	30	27	7	12	67	19.5437	21.1016	6.26	0.320307
ENSG00000211445	GPX3	0.94	5116	469	52	336	1836	420	5394	7	579	2144	2285	223	1115	368	290	3608	1515.12	1772.1	677	0.446828
ENSG00000228253	MT-ATP8	0.94	2599	1183	2458	1443	1180	22903	6922	2513	6409	3681	3277	712	4737	10871	1375	1387	4603.12	5584.09	7.66	0.00166409
ENSG00000254999	BRK1	0.94	373	421	316	380	387	101	217	463	100	410	377	494	530	128	489	459	352.812	141.84	92.1	0.261045
ENSG00000005022	SLC25A5	0.93	298	395	414	278	352	89	646	473	334	478	369	317	325	65	231	354	338.625	140.695	370	1.09265
ENSG00000012779	ALOX5	0.93	8	51	5	4	0.9	2	7	132	2	36	21	4	28	0.3	4	2	19.2	33.5128	4.24	0.220833
ENSG00000023909	GCLM	0.93	19	11	18	33	7	5	34	21	23	31	13	24	16	12	15	54	21	12.345	33.5	1.59524
ENSG00000037897	METTL1	0.93	4	18	3	6	4	2	15	3	5	7	6	23	9	9	11	13	8.625	5.99861	16.3	1.88986
ENSG00000055147	FAM114A2	0.93	14	18	6	14	12	7	12	18	7	9	13	23	18	9	31	17	14.25	6.5676	28.9	2.02807
ENSG00000067141	NEO1	0.93	10	27	68	19	22	6	21	5	4	28	23	56	31	22	63	40	27.8125	19.8367	5.32	0.191281
ENSG00000074527	NTN4	0.93	25	16	18	61	33	31	130	0.3	41	54	18	72	66	6	34	26	39.4562	31.9336	0.466	0.0118105
ENSG00000077232	DNAJC10	0.93	13	22	11	13	11	7	18	27	8	15	15	31	18	4	27	25	16.5625	7.94119	10.1	0.609811
ENSG00000078018	MAP2	0.93	6	3	253	4	6	3	5	0.2	1	18	2	4	5	1	12	22	21.575	62.0169	6.81	0.315643
ENSG00000080854	IGSF9B	0.93	0.4	1	2	0.2	0.8	3	0.4	0.7	0.1	0.4	0.8	1	3	0.1	1	4	1.18125	1.18278	0.081	0.0685714
ENSG00000081019	RSBN1	0.93	18	23	21	16	17	6	13	46	4	23	26	42	32	20	24	26	22.3125	11.1219	1.08	0.0484034
ENSG00000082512	TRAF5	0.93	3	43	4	6	4	1	5	16	0.6	5	18	19	14	0.6	10	4	9.575	10.8438	0.891	0.0930548
ENSG00000083123	BCKDHB	0.93	8	9	31	21	10	14	18	9	29	9	10	21	28	3	18	26	16.5	8.74833	23.8	1.44242
ENSG00000089335	ZNF302	0.93	7	22	26	14	11	12	15	12	6	10	14	43	27	10	17	47	18.3125	12.0594	0.13	0.00709898
ENSG00000100294	MCAT	0.93	5	11	11	8	4	5	16	7	13	8	7	14	13	14	13	18	10.4375	4.24215	5.65	0.541317
ENSG00000100483	VCPKMT	0.93	5	36	23	8	6	3	14	19	5	12	19	25	15	5	19	16	14.375	9.06182	0.251	0.0174609
ENSG00000100600	LGMN	0.93	55	107	32	124	31	46	128	6	44	109	48	80	118	25	48	160	72.5625	45.5338	12.7	0.175022
ENSG00000100625	SIX4	0.93	1	0.7	1	3	0.7	0.7	3	0.1	0.3	9	2	6	4	36	3	7	4.84375	8.70701	1	0.206452
ENSG00000100985	MMP9	0.93	7	41	0.9	40	0.9	0.7	0.5	37	0.7	18	13	7	0.8	0.3	3	0.2	10.6875	15.113	33.6	3.14386
ENSG00000103248	MTHFSD	0.93	2	7	3	4	3	1	3	5	2	2	3	7	6	2	8	6	4	2.19089	1.62	0.405
ENSG00000103479	RBL2	0.93	34	47	20	32	32	15	30	150	15	36	58	44	68	20	59	64	45.25	32.7607	0.928	0.0205083
ENSG00000104980	TIMM44	0.93	12	18	10	12	12	9	12	6	6	5	15	29	17	15	15	27	13.75	6.76757	59.8	4.34909
ENSG00000107863	ARHGAP21	0.93	28	19	126	68	14	12	13	17	7	29	15	68	24	9	35	30	32.125	31.0395	1.5	0.0466926
ENSG00000108582	CPD	0.93	72	29	41	45	30	12	39	78	54	65	40	30	29	13	46	39	41.375	18.7577	4.74	0.114562
ENSG00000108651	UTP6	0.93	12	30	8	17	9	5	13	26	6	9	18	31	21	10	31	24	16.875	9.20779	23	1.36296
ENSG00000108786	HSD17B1	0.93	2	3	4	5	3	0.9	2	2	0.5	2	5	5	3	0.4	2	4	2.7375	1.53444	44.5	16.2557
ENSG00000108828	VAT1	0.93	468	125	49	183	203	29	84	48	39	236	166	421	318	41	207	190	175.438	134.973	126	0.718204
ENSG00000110074	FOXRED1	0.93	5	11	13	6	2	4	8	4	10	3	10	8	9	2	8	9	7	3.3665	13.4	1.91429
ENSG00000110328	GALNT18	0.93	17	32	14	6	16	6	14	0.1	5	44	22	5	13	0.8	12	44	15.6813	13.707	0.766	0.0488481
ENSG00000110777	POU2AF1	0.93	0.8	71	1	2	0.6	0.2	0.5	14	0.2	6	83	3	2	0.1	1	1	11.65	25.8351	20.5	1.75966
ENSG00000111799	COL12A1	0.93	186	60	3	79	69	9	15	0.1	1	24	68	208	40	9	30	14	50.9438	62.8388	14.9	0.292479
ENSG00000112473	SLC39A7	0.93	112	117	56	102	58	27	124	51	90	117	83	128	79	21	88	142	87.1875	36.3945	23.1	0.264946
ENSG00000116455	WDR77	0.93	11	25	10	15	7	11	24	25	12	11	15	33	22	12	19	20	17	7.23878	88.9	5.22941
ENSG00000116906	GNPAT	0.93	44	55	31	56	52	44	46	58	24	34	59	76	73	97	80	69	56.125	19.4349	10.1	0.179955
ENSG00000121380	BCL2L14	0.93	0.2	0.7	0.3	0.8	3	0.1	0.3	0.5	0.3	0.6	0.4	0.6	0.9	0.1	16	0.3	1.56875	3.90823	0.411	0.261992
ENSG00000121579	NAA50	0.93	74	68	55	88	59	26	67	97	35	78	67	120	75	89	81	134	75.8125	27.355	98	1.29266
ENSG00000124486	USP9X	0.93	45	39	55	49	31	24	34	66	20	34	37	61	48	59	74	88	47.75	18.6029	21	0.439791
ENSG00000128656	CHN1	0.93	7	30	733	7	7	4	3	3	0.7	31	19	11	10	1	29	9	56.5438	180.68	1.67	0.0295347
ENSG00000129245	FXR2	0.93	24	18	43	20	21	38	21	22	8	24	32	25	37	85	39	53	31.875	18.1029	13	0.407843
ENSG00000129749	CHRNA10	0.93	0.2	0.4	0.1	0.9	0.3	0.3	0.9	0.5	0.4	0.5	2	0.6	0.6	18	0.9	1	1.725	4.36341	0	0
ENSG00000131174	COX7B	0.93	27	86	102	89	60	216	137	60	83	86	66	65	96	46	47	112	86.125	44.231	2.46	0.0285631
ENSG00000132199	ENOSF1	0.93	4	16	6	9	4	2	14	2	12	5	5	16	16	1	6	24	8.875	6.67208	3.48	0.392113
ENSG00000132394	EEFSEC	0.93	17	18	8	12	8	10	14	21	10	9	11	24	19	21	30	15	15.4375	6.39759	18.5	1.19838
ENSG00000134313	KIDINS220	0.93	27	25	63	25	29	14	28	52	9	29	25	55	43	30	34	44	33.25	14.5991	5.62	0.169023
ENSG00000135148	TRAFD1	0.93	18	36	23	19	21	8	16	83	5	62	32	33	36	5	49	32	29.875	20.9885	6.52	0.218243
ENSG00000135414	GDF11	0.93	4	9	10	2	5	5	4	6	0.7	5	9	21	9	1	6	6	6.41875	4.79781	0.077	0.0119961
ENSG00000135631	RAB11FIP5	0.93	20	22	27	12	9	8	24	7	3	27	21	28	19	16	86	19	21.75	18.7883	4.46	0.205057
ENSG00000136371	MTHFS	0.93	6	3	1	4	3	2	6	7	15	4	4	2	2	0.1	3	6	4.25625	3.46563	3.41	0.801175
ENSG00000138160	KIF11	0.93	2	7	3	3	1	0.9	1	3	0.6	3	5	4	2	0.3	38	5	4.925	9.01173	15.1	3.06599
ENSG00000138834	MAPK8IP3	0.93	5	20	48	5	4	4	4	3	1	10	23	12	11	2	9	9	10.625	11.7353	0.506	0.0476235
ENSG00000139505	MTMR6	0.93	23	42	53	26	21	22	30	73	12	30	27	47	49	16	52	47	35.625	16.6888	2.32	0.0651228
ENSG00000139625	MAP3K12	0.93	3	9	11	3	3	1	4	4	0.5	6	11	20	10	0.7	6	5	6.075	5.10065	0.506	0.0832922
ENSG00000139880	CDH24	0.93	2	3	3	2	2	0.4	2	0.3	0.1	5	6	5	2	0.3	5	4	2.63125	1.90743	0.13	0.0494062
ENSG00000140749	IGSF6	0.93	4	37	5	10	1	2	2	264	4	14	18	15	7	1	5	3	24.5	64.527	0.279	0.0113878
ENSG00000141098	GFOD2	0.93	8	24	8	7	5	2	9	6	10	8	13	10	9	4	9	8	8.75	4.82355	0.21	0.024
ENSG00000142687	KIAA0319L	0.93	13	23	26	11	6	20	20	27	17	16	18	21	18	14	16	42	19.25	8.08703	6.46	0.335584
ENSG00000144645	OSBPL10	0.93	8	15	3	4	3	1	9	4	0.4	5	14	4	27	0.5	14	2	7.11875	7.1953	1.75	0.24583
ENSG00000144746	ARL6IP5	0.93	157	282	351	319	244	210	158	633	39	324	379	202	324	199	199	290	269.375	130.802	361	1.34014
ENSG00000147526	TACC1	0.93	164	83	84	92	105	36	57	71	14	109	87	77	135	12	75	73	79.625	39.473	8.09	0.101601
ENSG00000147684	NDUFB9	0.93	56	94	143	100	70	148	153	80	94	68	58	68	108	260	116	170	111.625	53.379	70.2	0.628891
ENSG00000148700	ADD3	0.93	43	59	161	44	68	35	68	212	8	58	81	88	77	6	96	140	77.75	54.404	28.2	0.362701
ENSG00000150540	HNMT	0.93	30	28	12	78	27	5	32	40	30	29	34	61	54	3	34	18	32.1875	19.5558	14.8	0.459806
ENSG00000153485	TMEM251	0.93	21	20	12	26	25	16	29	38	9	17	22	37	39	20	26	60	26.0625	12.5935	0.184	0.00705995
ENSG00000153832	FBXO36	0.93	3	3	7	3	0.6	0.6	4	1	0.9	9	1	9	3	0.9	12	10	4.25	3.85002	0	0
ENSG00000154262	ABCA6	0.93	13	2	5	8	14	6	2	0.2	17	9	7	10	15	2	3	4	7.325	5.24436	0.179	0.0244369
ENSG00000155100	OTUD6B	0.93	8	12	18	11	9	6	11	14	6	5	8	19	17	7	14	21	11.625	5.07116	24.2	2.08172
ENSG00000157625	TAB3	0.93	9	10	12	9	4	5	11	15	9	7	9	18	11	6	17	15	10.4375	4.13068	1.2	0.11497
ENSG00000158882	TOMM40L	0.93	8	17	14	12	9	13	15	9	12	10	9	11	13	3	6	15	11	3.63318	3.83	0.348182
ENSG00000159147	DONSON	0.93	6	8	11	6	3	2	7	3	5	12	16	15	10	2	33	7	9.125	7.69307	0.442	0.0484384
ENSG00000159496	RGL4	0.93	2	2	0.4	0.3	0.1	0.1	0.6	4	0.2	2	2	1	0.7	0.1	1	0.4	1.05625	1.07949	0.019	0.0179882
ENSG00000159917	ZNF235	0.93	1	3	2	2	2	1	2	5	0.6	1	4	3	3	0.5	4	3	2.31875	1.33127	0.165	0.071159
ENSG00000162384	C1orf123	0.93	27	41	23	27	25	9	18	20	9	16	25	48	47	17	35	26	25.8125	11.839	35.9	1.3908
ENSG00000163138	PACRGL	0.93	4	8	10	6	5	3	6	5	2	5	6	14	11	1	31	14	8.1875	7.20388	1.09	0.13313
ENSG00000163154	TNFAIP8L2	0.93	4	28	3	4	1	2	3	203	4	9	19	4	5	0.4	2	2	18.3375	49.7828	8.04	0.438446
ENSG00000163545	NUAK2	0.93	2	18	2	1	3	0.3	8	82	3	66	15	8	3	1	5	48	16.5813	25.4612	0.638	0.0384772
ENSG00000164221	CCDC112	0.93	3	8	18	8	9	3	4	15	0.7	4	5	9	16	1	68	9	11.2937	15.9911	0.049	0.00433868
ENSG00000165392	WRN	0.93	9	16	6	9	5	3	5	7	3	5	7	20	10	3	16	13	8.5625	5.20216	0.523	0.0610803
ENSG00000166529	ZSCAN21	0.93	4	11	6	6	4	2	7	6	4	4	7	15	13	6	13	12	7.5	3.9833	0.602	0.0802667
ENSG00000167552	TUBA1A	0.93	34	127	626	103	89	31	67	171	4	70	57	201	118	8	69	27	112.625	147.756	714	6.33962
ENSG00000167703	SLC43A2	0.93	8	8	7	8	3	0.6	14	49	0.8	7	4	4	6	14	3	11	9.2125	11.3522	1.4	0.151967
ENSG00000168216	LMBRD1	0.93	64	110	171	113	106	45	165	191	83	153	128	145	213	56	98	250	130.688	57.8627	2.43	0.018594
ENSG00000169223	LMAN2	0.93	65	94	22	53	58	17	86	122	149	85	96	92	89	32	116	136	82	38.9067	150	1.82927
ENSG00000169330	KIAA1024	0.93	0.2	0.5	2	0.2	0.1	0.1	0.4	0.3	0.1	0.2	2	0.6	0.3	0.1	0.9	0.8	0.55	0.617522	0.368	0.669091
ENSG00000169902	TPST1	0.93	13	17	28	12	13	2	22	10	30	25	15	57	74	1	44	17	23.75	19.696	0.084	0.00353684
ENSG00000170445	HARS	0.93	17	33	37	16	16	6	15	15	11	14	21	28	22	11	25	24	19.4375	8.35838	125	6.43087
ENSG00000170537	TMC7	0.93	5	2	18	4	1	0.6	1	0.1	0.2	3	1	2	8	0.3	14	2	3.8875	5.21343	0.429	0.110354
ENSG00000170631	ZNF16	0.93	2	6	3	3	4	2	2	3	1	2	3	10	9	6	11	9	4.75	3.29646	0.461	0.0970526
ENSG00000170759	KIF5B	0.93	116	149	167	250	182	124	111	124	25	195	101	146	225	116	170	147	146.75	53.1858	77.8	0.530153
ENSG00000171720	HDAC3	0.93	15	29	16	18	8	10	16	36	12	16	28	31	31	14	20	31	20.6875	8.85979	2.5	0.120846
ENSG00000171843	MLLT3	0.93	3	5	8	4	10	3	5	13	0.4	7	9	7	11	0.8	7	20	7.075	4.93903	0.943	0.133286
ENSG00000172888	ZNF621	0.93	5	13	10	10	5	4	9	10	3	6	14	19	12	3	11	10	9	4.44222	0.067	0.00744444
ENSG00000173064	HECTD4	0.93	5	6	18	5	5	3	5	8	2	5	9	9	11	3	9	10	7.0625	3.9744	1.08	0.15292
ENSG00000174600	CMKLR1	0.93	11	24	4	9	6	3	8	34	5	10	13	10	11	3	19	13	11.4375	8.24596	0.119	0.0104044
ENSG00000175066	GK5	0.93	6	6	5	9	3	2	7	5	2	6	4	12	11	2	6	8	5.875	3.0304	0.191	0.0325106
ENSG00000175938	ORAI3	0.93	11	13	4	11	12	2	10	25	12	9	11	14	35	3	12	10	12.125	8.03223	0.281	0.0231753
ENSG00000176476	SGF29	0.93	13	26	6	14	18	4	7	25	7	11	21	44	27	63	44	27	22.3125	16.4021	1.68	0.0752941
ENSG00000179104	TMTC2	0.93	8	5	23	4	13	2	10	7	0.2	16	7	8	23	0.7	7	11	9.05625	6.89096	0.026	0.00287095
ENSG00000179134	SAMD4B	0.93	25	20	34	17	21	8	15	15	7	35	23	41	36	11	30	29	22.9375	10.4847	4.67	0.203597
ENSG00000182795	C1orf116	0.93	0.1	0.1	0.5	5	2	0.3	8	1	0.3	52	0.3	1	18	0.5	0.5	11	6.2875	13.1973	7.96	1.266
ENSG00000183605	SFXN4	0.93	15	33	19	24	18	23	38	13	36	10	19	26	50	55	31	60	29.375	15.1212	2.2	0.0748936
ENSG00000184481	FOXO4	0.93	52	25	43	48	51	19	15	42	6	34	36	69	59	71	48	48	41.625	18.4206	0.476	0.0114354
ENSG00000184613	NELL2	0.93	0.2	10	174	1	2	0.1	1	44	0.1	16	9	20	2	0.1	4	22	19.0938	42.993	3.04	0.159214
ENSG00000184897	H1FX	0.93	103	272	84	91	55	17	39	119	40	149	116	126	197	49	55	333	115.312	87.3428	112	0.971274
ENSG00000184939	ZFP90	0.93	13	17	16	14	12	3	9	22	1	17	16	45	22	3	19	11	15	10.2437	0.08	0.00533333
ENSG00000185436	IFNLR1	0.93	0.3	4	1	2	0.4	0.9	4	3	3	4	5	3	3	2	1	6	2.6625	1.68597	0.079	0.0296714
ENSG00000186654	PRR5	0.93	7	13	1	18	2	0.4	4	8	3	3	10	9	6	0.3	8	5	6.10625	4.86257	1.63	0.26694
ENSG00000187231	SESTD1	0.93	54	14	44	47	21	5	10	11	2	27	15	16	37	4	25	13	21.5625	16.1203	1.23	0.0570435
ENSG00000188157	AGRN	0.93	10	10	10	14	4	3	26	1	5	15	5	16	12	0.6	10	31	10.7875	8.45552	11.6	1.07532
ENSG00000196345	ZKSCAN7	0.93	0.9	2	1	2	0.8	0.8	3	3	0.7	0.5	2	8	6	0.1	4	4	2.425	2.18708	0.143	0.0589691
ENSG00000196411	EPHB4	0.93	31	51	2	22	13	9	16	4	23	17	24	72	15	1	22	17	21.1875	18.196	1.63	0.0769322
ENSG00000196642	RABL6	0.93	13	18	17	14	9	7	7	13	2	8	12	17	10	11	14	17	11.8125	4.4754	18.5	1.56614
ENSG00000196757	ZNF700	0.93	5	27	6	10	6	2	14	13	5	11	18	28	16	3	12	10	11.625	7.72766	0.285	0.0245161
ENSG00000197150	ABCB8	0.93	2	6	4	4	2	1	6	4	5	3	6	8	4	1	4	6	4.125	1.99583	7.05	1.70909
ENSG00000197622	CDC42SE1	0.93	48	107	33	35	26	15	46	413	14	121	149	78	74	16	31	55	78.8125	97.6765	6.08	0.0771451
ENSG00000197635	DPP4	0.93	43	11	2	17	10	2	47	28	15	14	12	25	29	5	10	6	17.25	13.6406	15.1	0.875362
ENSG00000198865	CCDC152	0.93	5	11	8	11	4	2	3	3	17	11	11	11	6	2	13	8	7.875	4.48516	0.019	0.0024127
ENSG00000204381	LAYN	0.93	8	31	25	4	21	3	4	0.3	0.4	24	18	31	28	2	22	37	16.1687	12.7838	0.625	0.0386548
ENSG00000213918	DNASE1	0.93	0.7	3	0.9	2	2	0.6	5	2	0.5	2	8	5	3	0.9	3	2	2.5375	2.01159	7.67	3.02266
ENSG00000236609	ZNF853	0.93	7	10	20	4	8	5	4	4	0.4	5	7	33	14	5	8	25	9.9625	8.83605	0.278	0.0279046
ENSG00000012223	LTF	0.92	20	22	1	149	1	2	34	8	0.8	283	10	1	55	0.3	96	10	43.3188	76.0783	224	5.17097
ENSG00000025039	RRAGD	0.92	25	10	32	37	17	69	43	17	5	24	14	19	40	93	33	125	37.6875	32.3537	3.96	0.105075
ENSG00000034510	TMSB10	0.92	2896	4706	1464	2357	2230	433	1266	5774	244	4630	2958	2516	2098	222	1928	886	2288	1635.13	450	0.196678
ENSG00000055609	KMT2C	0.92	16	14	14	14	9	7	10	36	4	14	18	26	18	18	16	22	16	7.63326	0.548	0.03425
ENSG00000072518	MARK2	0.92	11	16	17	11	8	8	10	51	3	17	20	21	18	9	16	24	16.25	10.8536	11.3	0.695385
ENSG00000073712	FERMT2	0.92	68	52	34	107	87	29	38	0.3	13	102	45	79	179	12	53	40	58.6437	44.8662	37.3	0.636044
ENSG00000087157	PGS1	0.92	12	21	11	7	6	3	9	14	3	30	35	15	15	6	14	16	13.5625	8.96637	0.345	0.0254378
ENSG00000092978	GPATCH2	0.92	3	6	7	4	4	3	4	6	2	3	4	12	9	1	9	9	5.375	3.07409	1.22	0.226977
ENSG00000099974	DDTL	0.92	2	6	3	3	2	1	10	3	3	3	10	7	6	0.9	2	8	4.36875	3.03792	84.2	19.2732
ENSG00000100227	POLDIP3	0.92	32	43	39	38	52	16	51	120	18	71	77	173	91	36	77	73	62.9375	40.3971	33.7	0.535452
ENSG00000100354	TNRC6B	0.92	10	15	12	11	4	6	6	20	3	6	16	13	10	7	15	12	10.375	4.78714	1.91	0.184096
ENSG00000100823	APEX1	0.92	131	239	123	150	93	42	94	169	68	93	118	252	175	88	106	251	137	64.6653	205	1.49635
ENSG00000101216	GMEB2	0.92	6	18	5	6	3	2	6	16	3	8	10	16	8	4	17	27	9.6875	7.07784	2.25	0.232258
ENSG00000101955	SRPX	0.92	206	164	12	60	244	44	18	0.2	25	80	223	28	273	10	122	130	102.45	93.412	3.11	0.0303563
ENSG00000103051	COG4	0.92	17	26	20	25	16	13	21	18	12	17	28	32	32	36	32	29	23.375	7.58837	11.4	0.487701
ENSG00000103647	CORO2B	0.92	7	12	83	6	6	4	9	3	0.6	8	7	67	8	1	7	9	14.85	23.8453	1.38	0.0929293
ENSG00000104714	ERICH1	0.92	6	11	5	4	3	2	3	10	2	4	7	6	5	2	6	10	5.375	2.91833	1.14	0.212093
ENSG00000104835	SARS2	0.92	1	6	2	2	0.9	1	2	2	2	2	2	3	4	2	2	6	2.49375	1.55584	24.2	9.70426
ENSG00000105146	AURKC	0.92	1	5	4	3	0.4	0.6	0.9	0.3	1	4	2	2	1	0.4	56	4	5.35	13.5956	0.373	0.0697196
ENSG00000106009	BRAT1	0.92	6	14	4	10	4	2	5	10	3	4	13	13	11	4	16	8	7.9375	4.50879	3.45	0.434646
ENSG00000106066	CPVL	0.92	23	37	9	23	16	29	80	418	6	40	35	46	39	7	56	176	65	102.563	10.2	0.156923
ENSG00000108349	CASC3	0.92	79	56	57	52	45	17	38	79	14	60	65	129	116	38	96	105	65.375	33.4163	5.52	0.0844359
ENSG00000108395	TRIM37	0.92	11	19	130	13	13	10	13	16	5	10	18	30	22	10	85	25	26.875	33.1378	0.179	0.00666047
ENSG00000108557	RAI1	0.92	3	7	5	4	3	3	4	4	1	7	5	17	8	1	6	9	5.4375	3.84654	1.4	0.257471
ENSG00000112996	MRPS30	0.92	11	15	26	16	12	20	23	24	13	10	18	32	24	21	22	27	19.625	6.38618	11.6	0.591083
ENSG00000113328	CCNG1	0.92	117	92	45	120	154	76	117	137	43	142	131	270	282	84	131	151	130.75	66.1387	0.231	0.00176673
ENSG00000114126	TFDP2	0.92	14	14	10	25	12	14	14	13	4	7	9	26	24	8	31	27	15.75	8.18535	0.776	0.0492698
ENSG00000114867	EIF4G1	0.92	95	119	56	89	52	51	83	81	89	100	71	133	89	281	95	212	106	60.4009	154	1.45283
ENSG00000116574	RHOU	0.92	18	147	212	25	23	7	22	39	18	51	41	117	80	16	47	43	56.625	56.4457	0.981	0.0173245
ENSG00000119725	ZNF410	0.92	2	3	2	2	1	0.2	1	0.6	0.4	0.8	1	4	1	0.8	4	2	1.6125	1.18989	0.09	0.055814
ENSG00000119929	CUTC	0.92	43	77	30	74	18	30	18	39	19	21	29	38	70	111	70	121	50.5	32.9323	16.7	0.330693
ENSG00000120694	HSPH1	0.92	13	16	78	25	91	11	56	45	9	80	154	95	50	11	140	221	68.4375	61.1239	137	2.00183
ENSG00000120729	MYOT	0.92	1	3	10	41	27	13	1	0.4	0.2	0.7	9	1	7	538	20	412	67.7687	161.023	0.205	0.00302499
ENSG00000120896	SORBS3	0.92	95	54	23	47	51	12	19	10	18	47	43	73	66	19	83	46	44.125	26.033	5.87	0.133031
ENSG00000125266	EFNB2	0.92	101	72	34	36	43	12	24	0.2	6	84	34	37	27	7	26	20	35.2	28.346	3.06	0.0869318
ENSG00000126062	TMEM115	0.92	36	32	18	26	19	11	30	31	11	29	36	44	42	22	26	60	29.5625	12.6437	1.78	0.0602114
ENSG00000126267	COX6B1	0.92	120	262	173	214	162	411	267	359	261	302	277	154	340	346	141	218	250.438	86.8301	367	1.46544
ENSG00000126391	FRMD8	0.92	40	34	8	14	7	4	12	35	5	36	28	20	15	4	14	26	18.875	12.5638	2.34	0.123974
ENSG00000126858	RHOT1	0.92	15	16	38	21	26	19	20	45	7	23	22	36	45	12	33	31	25.5625	11.4016	6.14	0.240196
ENSG00000130726	TRIM28	0.92	60	106	44	57	80	22	50	103	22	79	118	196	135	107	143	108	89.375	46.9466	355	3.97203
ENSG00000131100	ATP6V1E1	0.92	80	111	309	77	84	86	154	139	42	106	84	96	165	77	102	133	115.312	60.7659	113	0.979946
ENSG00000133048	CHI3L1	0.92	20	22	36	41	7	2	47	29	564	22	25	19	21	8	56	38	59.8125	135.247	20.1	0.33605
ENSG00000133460	SLC2A11	0.92	0.9	6	5	4	1	2	7	1	0.5	0.7	4	5	6	0.7	3	7	3.3625	2.42401	0.072	0.0214126
ENSG00000134086	VHL	0.92	33	79	30	31	11	7	25	82	13	25	56	51	23	8	35	49	34.875	23.0936	1.02	0.0292473
ENSG00000134318	ROCK2	0.92	59	39	37	36	32	21	30	22	9	42	36	61	79	26	44	45	38.625	17.0992	34.1	0.882848
ENSG00000137221	TJAP1	0.92	7	16	11	8	4	3	6	9	3	8	14	16	15	14	10	14	9.875	4.57347	4.32	0.437468
ENSG00000138385	SSB	0.92	66	71	70	75	64	20	56	60	19	44	55	106	79	15	75	114	61.8125	27.8884	423	6.84328
ENSG00000141665	FBXO15	0.92	0.6	2	3	0.7	0.3	0.6	1	0.5	0.3	3	0.8	4	1	0.3	11	1	1.88125	2.6801	0.069	0.0366777
ENSG00000143297	FCRL5	0.92	0.4	15	0.7	0.5	0.2	0.2	0.4	3	0.7	2	35	1	0.4	0.1	0.9	0.4	3.80625	9.07366	0.989	0.259836
ENSG00000143368	SF3B4	0.92	36	66	25	35	22	13	35	98	16	43	35	102	60	19	92	57	47.125	29.28	26.5	0.562334
ENSG00000143970	ASXL2	0.92	11	12	8	12	7	7	11	36	3	9	15	16	13	8	20	15	12.6875	7.48972	1.41	0.111133
ENSG00000144366	GULP1	0.92	4	4	4	4	9	1	10	0.1	0.7	11	5	14	16	1	16	10	6.8625	5.46503	6.26	0.912204
ENSG00000144554	FANCD2	0.92	1	9	1	2	0.5	0.4	1	4	0.3	1	4	2	2	0.2	10	2	2.525	2.96119	6.22	2.46337
ENSG00000144724	PTPRG	0.92	31	15	14	23	17	8	32	0.2	5	30	16	20	16	5	25	41	18.6375	11.2497	7.03	0.377197
ENSG00000146540	C7orf50	0.92	12	13	14	14	10	5	11	11	3	9	5	26	21	4	13	33	12.75	8.07052	34.5	2.70588
ENSG00000146700	SSC4D	0.92	0.6	0.6	0.4	4	0.1	0.3	4	0.2	1	0.2	0.1	3	0.3	0.4	0.9	4	1.25625	1.52489	0.244	0.194229
ENSG00000147202	DIAPH2	0.92	28	15	5	22	18	5	5	20	5	21	16	19	27	21	26	11	16.5	8.10761	6.49	0.393333
ENSG00000149577	SIDT2	0.92	29	19	15	33	10	4	8	49	10	22	22	49	23	6	16	18	20.8125	13.6148	0.225	0.0108108
ENSG00000151882	CCL28	0.92	2	8	3	47	3	0.4	3	7	1	4	5	2	4	0.5	4	23	7.30625	11.8499	0.546	0.0747305
ENSG00000153531	ADPRHL1	0.92	2	2	9	7	1	201	1	0.4	0.5	2	2	4	2	43	8	33	19.8687	49.8365	5.83	0.293426
ENSG00000154153	RETREG1	0.92	28	8	83	25	20	111	72	17	10	17	20	8	11	474	31	62	62.3125	113.984	0.213	0.00341825
ENSG00000156414	TDRD9	0.92	1	1	3	0.5	0.4	1	2	6	0.2	0.5	1	0.4	0.1	0.1	51	41	6.825	15.4717	0.301	0.0441026
ENSG00000158321	AUTS2	0.92	9	6	11	11	5	1	6	8	4	12	8	18	9	6	11	6	8.1875	3.95337	1.57	0.191756
ENSG00000160072	ATAD3B	0.92	1	8	1	2	1	0.8	3	1	2	3	7	3	5	0.4	3	3	2.7625	2.21657	14.5	5.24887
ENSG00000160233	LRRC3	0.92	5	0.8	0.2	3	5	1	0.3	1	10	3	2	7	6	0.1	3	2	3.0875	2.83146	0.083	0.0268826
ENSG00000162924	REL	0.92	3	8	1	2	1	1	1	22	0.6	6	6	6	4	0.8	3	2	4.2125	5.28569	24.9	5.91098
ENSG00000163382	NAXE	0.92	45	97	54	72	45	38	78	46	41	50	62	94	85	36	72	89	62.75	21.1171	85.9	1.36892
ENSG00000163848	ZNF148	0.92	19	22	23	21	17	15	19	43	7	15	17	41	27	18	26	47	23.5625	11.0693	3.35	0.142175
ENSG00000164124	TMEM144	0.92	2	1	171	7	1	3	2	1	0.5	3	0.8	8	4	0.2	8	12	14.0312	41.9983	0.012	0.000855234
ENSG00000164176	EDIL3	0.92	20	35	491	19	60	14	27	0.1	0.3	122	27	23	43	3	45	9	58.65	119.069	4.74	0.0808184
ENSG00000164323	CFAP97	0.92	33	42	28	30	28	6	24	30	12	32	29	58	42	9	71	47	32.5625	17.0018	0.353	0.0108407
ENSG00000165810	BTNL9	0.92	179	22	3	89	25	27	6	0.2	3	34	25	4	14	3	5	15	28.3875	45.6161	0.13	0.00457948
ENSG00000166398	KIAA0355	0.92	41	21	11	16	13	8	11	11	6	39	23	18	22	9	18	17	17.75	10.0698	0.354	0.0199437
ENSG00000167601	AXL	0.92	132	43	27	54	82	9	16	2	8	83	37	58	85	15	64	39	47.125	35.7806	4.75	0.100796
ENSG00000168906	MAT2A	0.92	36	151	77	75	32	44	133	106	48	44	100	343	99	37	94	637	128.5	155.135	196	1.52529
ENSG00000168994	PXDC1	0.92	67	44	25	84	28	16	25	2	120	79	53	27	53	22	22	121	49.25	36.1137	0.259	0.00525888
ENSG00000169692	AGPAT2	0.92	161	29	4	477	25	13	27	35	142	36	30	28	28	21	23	54	70.8125	116.801	1.18	0.0166637
ENSG00000171488	LRRC8C	0.92	17	14	6	15	5	7	4	52	1	14	19	11	7	2	11	5	11.875	12.0049	12.2	1.02737
ENSG00000172939	OXSR1	0.92	43	27	16	34	20	17	33	50	8	34	23	48	49	37	45	37	32.5625	12.9613	47.4	1.45566
ENSG00000174206	C12orf66	0.92	5	8	8	5	2	1	4	7	5	3	5	8	5	7	6	10	5.5625	2.39357	0.031	0.00557303
ENSG00000174276	ZNHIT2	0.92	5	14	5	7	2	2	7	9	6	4	5	14	7	8	28	20	8.9375	6.95192	2.23	0.24951
ENSG00000174669	SLC29A2	0.92	4	8	4	5	3	6	10	0.9	3	6	4	3	6	30	3	18	7.11875	7.28004	0.684	0.0960843
ENSG00000175854	SWI5	0.92	14	12	12	15	16	4	15	10	10	15	15	26	31	6	71	17	18.0625	15.5755	0.127	0.00703114
ENSG00000178104	PDE4DIP	0.92	7	6	31	15	6	85	18	6	6	10	16	10	8	109	11	47	24.4375	30.6637	1.71	0.0699744
ENSG00000178921	PFAS	0.92	7	15	3	6	3	2	6	5	3	3	7	14	7	2	7	7	6.0625	3.82045	93	15.3402
ENSG00000178982	EIF3K	0.92	90	139	68	112	88	94	105	189	56	121	123	112	207	112	61	100	111.062	40.9235	97.7	0.879685
ENSG00000179051	RCC2	0.92	46	84	19	41	24	8	24	110	7	52	86	82	43	9	59	41	45.9375	31.3379	67	1.4585
ENSG00000179271	GADD45GIP1	0.92	28	56	25	30	29	16	27	18	20	31	34	38	38	26	36	39	30.6875	9.74829	19.1	0.622403
ENSG00000180035	ZNF48	0.92	3	8	11	4	4	1	4	7	1	2	5	10	7	4	5	7	5.1875	2.94887	0.393	0.075759
ENSG00000180370	PAK2	0.92	100	87	62	72	61	31	54	238	38	89	84	90	76	51	55	72	78.75	46.7055	143	1.81587
ENSG00000181350	LRRC75A	0.92	1	4	6	1	4	0.2	1	5	0.1	2	3	11	3	0.2	11	3	3.46875	3.43098	0.02	0.00576577
ENSG00000181666	HKR1	0.92	8	22	13	12	7	6	11	7	2	12	15	24	22	4	15	25	12.8125	7.25	0.331	0.0258341
ENSG00000181991	MRPS11	0.92	6	11	10	9	5	5	8	6	6	3	8	8	8	3	9	16	7.5625	3.22426	35.5	4.69421
ENSG00000182606	TRAK1	0.92	12	26	28	24	11	44	15	21	3	23	16	16	25	29	12	43	21.75	11.0845	0.428	0.0196782
ENSG00000182993	C12orf60	0.92	0.6	3	2	0.8	0.8	2	2	0.9	0.9	0.7	4	1	1	0.2	18	2	2.49375	4.25276	0.152	0.0609524
ENSG00000185127	C6orf120	0.92	27	30	43	42	17	13	32	57	21	19	40	51	38	16	23	32	31.3125	13.0165	8.8	0.281038
ENSG00000186026	ZNF284	0.92	1	3	2	2	0.9	0.7	1	2	0.3	1	6	3	4	0.7	2	2	1.975	1.47128	0.035	0.0177215
ENSG00000188707	ZBED6CL	0.92	0.8	13	1	3	0.8	0.5	7	14	11	2	8	14	4	0.1	2	15	6.0125	5.63996	0.194	0.0322661
ENSG00000196235	SUPT5H	0.92	43	55	57	28	25	13	24	42	11	33	39	72	46	42	111	75	44.75	25.4833	41.9	0.936313
ENSG00000196470	SIAH1	0.92	11	13	11	13	8	3	7	6	5	11	10	19	13	6	20	12	10.5	4.69042	0.565	0.0538095
ENSG00000196497	IPO4	0.92	0.5	2	0.3	1	0.7	0.3	3	0.7	2	1	1	2	2	3	5	2	1.65625	1.25218	19.5	11.7736
ENSG00000198258	UBL5	0.92	85	147	146	127	109	81	118	169	75	145	122	172	170	62	219	231	136.125	48.9283	11.7	0.0859504
ENSG00000198917	SPOUT1	0.92	9	19	10	8	6	2	8	15	4	7	22	18	16	3	10	18	10.9375	6.23398	8.86	0.810057
ENSG00000205213	LGR4	0.92	15	7	15	33	14	18	80	2	29	6	6	38	23	3	20	25	20.875	19.0783	0.14	0.00670659
ENSG00000213699	SLC35F6	0.92	116	63	22	38	21	13	55	43	28	25	28	59	43	34	25	54	41.6875	24.8347	5.64	0.135292
ENSG00000224383	PRR29	0.92	3	4	1	2	0.9	0.6	0.8	3	0.3	10	4	10	0.9	0.2	4	3	2.98125	3.06098	0.002	0.00067086
ENSG00000244045	TMEM199	0.92	6	14	7	6	4	3	10	15	5	4	11	11	10	2	10	15	8.3125	4.26956	3.68	0.442707
ENSG00000254685	FPGT	0.92	9	7	6	13	9	5	18	20	6	6	10	24	16	2	17	15	11.4375	6.29252	1.3	0.113661
ENSG00000263961	C1orf186	0.92	0.8	11	0.6	1	1	0.2	11	4	0.4	2	11	5	10	0.1	3	8	4.31875	4.36489	0.25	0.0578871
ENSG00000005194	CIAPIN1	0.91	19	42	28	20	11	14	29	32	15	17	20	30	18	17	95	43	28.125	20.225	25.6	0.910222
ENSG00000006432	MAP3K9	0.91	0.2	2	16	0.8	0.4	0.6	3	3	1	4	8	2	1	0.4	7	5	3.4	4.11825	0.04	0.0117647
ENSG00000039650	PNKP	0.91	8	22	6	7	3	2	7	5	4	8	12	14	10	5	11	14	8.625	5.11045	16.1	1.86667
ENSG00000050628	PTGER3	0.91	45	2	1	72	8	0.9	77	0.2	0.1	2	5	4	12	0.1	7	2	14.8938	25.6914	0.267	0.017927
ENSG00000057704	TMCC3	0.91	34	11	24	10	15	2	11	25	2	7	13	18	24	24	12	21	15.8125	8.98309	0.601	0.0380079
ENSG00000065621	GSTO2	0.91	0.4	1	3	3	0.9	0.3	5	0.2	0.3	1	0.4	3	4	0.4	5	8	2.24375	2.30881	0.068	0.0303064
ENSG00000068976	PYGM	0.91	3	22	29	199	14	38	1	0.6	0.4	3	7	9	34	690	47	295	87	180.389	475	5.45977
ENSG00000069329	VPS35	0.91	36	37	60	43	44	25	41	76	8	39	39	75	74	22	68	49	46	19.9867	123	2.67391
ENSG00000070526	ST6GALNAC1	0.91	2	2	2	2	35	2	0.2	2	0.1	11	0.9	4	3	0.5	5	1	4.54375	8.53143	0.609	0.13403
ENSG00000071794	HLTF	0.91	9	19	41	24	9	11	16	14	6	6	15	39	33	3	82	37	22.75	20.1345	9.4	0.413187
ENSG00000076356	PLXNA2	0.91	10	9	14	6	5	4	5	2	2	29	5	26	20	4	3	14	9.875	8.5235	0.332	0.0336203
ENSG00000079819	EPB41L2	0.91	37	37	60	76	58	14	13	8	5	69	43	91	40	3	53	27	39.625	26.8921	75.9	1.91546
ENSG00000083814	ZNF671	0.91	1	15	7	5	4	3	8	14	0.8	4	16	4	10	3	8	17	7.4875	5.40763	0.456	0.0609015
ENSG00000084693	AGBL5	0.91	13	16	9	12	6	3	11	7	2	9	10	26	24	4	192	28	23.25	45.6925	0.475	0.0204301
ENSG00000086827	ZW10	0.91	12	14	12	19	10	6	15	21	9	9	16	25	27	40	41	23	18.6875	10.4608	20.3	1.08629
ENSG00000091436	MAP3K20	0.91	34	55	11	78	111	149	8	11	6	52	33	76	175	235	45	104	73.9375	66.2928	6.71	0.0907523
ENSG00000093072	ADA2	0.91	12	40	7	21	7	6	11	402	4	54	48	23	12	2	14	11	42.125	97.2563	4.23	0.100415
ENSG00000099364	FBXL19	0.91	5	5	12	4	3	1	5	7	0.9	5	8	9	7	0.6	17	5	5.90625	4.24287	0.214	0.0362328
ENSG00000100154	TTC28	0.91	15	20	7	18	10	5	8	1	3	14	8	49	19	4	15	13	13.0625	11.2515	0.414	0.0316938
ENSG00000100239	PPP6R2	0.91	19	28	25	19	11	13	19	23	18	17	29	24	23	28	44	32	23.25	8.02081	1.9	0.0817204
ENSG00000100938	GMPR2	0.91	28	46	47	26	24	11	37	61	16	37	47	46	57	9	29	69	36.875	17.697	41.1	1.11458
ENSG00000100949	RABGGTA	0.91	6	15	9	14	4	4	11	13	5	10	16	13	16	10	18	11	10.9375	4.44925	25.8	2.35886
ENSG00000101191	DIDO1	0.91	8	19	8	12	7	5	11	19	4	11	22	28	19	7	17	23	13.75	7.28926	8.86	0.644364
ENSG00000105397	TYK2	0.91	13	31	8	14	8	6	13	39	8	15	37	24	16	13	9	19	17.0625	10.4017	6.23	0.365128
ENSG00000105429	MEGF8	0.91	10	15	33	15	8	10	11	4	4	4	9	25	11	3	10	21	12.0625	8.25	2.69	0.223005
ENSG00000106546	AHR	0.91	65	72	18	58	50	16	30	91	25	126	65	121	94	5	31	41	56.75	36.8556	0.982	0.017304
ENSG00000107036	RIC1	0.91	11	17	9	14	6	5	8	35	5	13	17	16	14	8	17	13	13	7.25718	0.189	0.0145385
ENSG00000107862	GBF1	0.91	32	41	32	24	16	24	32	49	15	31	38	53	44	75	56	52	38.375	15.9995	26	0.677524
ENSG00000109339	MAPK10	0.91	4	3	78	16	4	0.6	6	0.2	0.1	5	3	13	22	0.1	12	7	10.875	18.9827	3.42	0.314483
ENSG00000109534	GAR1	0.91	35	61	30	50	29	6	25	22	9	11	16	98	23	9	51	55	33.125	24.5951	68.8	2.07698
ENSG00000110172	CHORDC1	0.91	4	9	9	7	15	5	10	13	3	13	37	18	12	3	15	26	12.4375	8.92912	93.1	7.48543
ENSG00000110200	ANAPC15	0.91	4	16	12	9	6	4	7	9	2	5	4	7	10	2	18	17	8.25	5.17043	0.642	0.0778182
ENSG00000110274	CEP164	0.91	3	7	3	4	2	0.6	3	6	1	4	6	12	6	1	11	5	4.6625	3.31197	0.134	0.0287399
ENSG00000110906	KCTD10	0.91	45	51	20	40	19	6	22	19	4	34	23	31	43	4	28	45	27.125	15.1256	1.99	0.0733641
ENSG00000111087	GLI1	0.91	0.2	5	0.6	1	0.3	0.1	1	0.8	0.3	0.6	2	3	2	0.3	11	1	1.825	2.76152	0.077	0.0421918
ENSG00000111913	RIPOR2	0.91	8	67	10	3	3	1	3	374	1	25	46	5	5	16	7	7	36.3125	91.8714	0.906	0.0249501
ENSG00000112096	SOD2	0.91	368	154	101	107	169	98	531	228	88	378	214	94	217	2899	86	566	393.625	685.962	396	1.00603
ENSG00000112699	GMDS	0.91	7	13	3	6	13	2	11	9	10	10	9	9	8	1	13	12	8.5	3.84708	26.3	3.09412
ENSG00000113231	PDE8B	0.91	11	2	33	16	5	2	10	2	1	9	4	9	16	0.5	9	141	16.9062	34.0853	0.237	0.0140185
ENSG00000113575	PPP2CA	0.91	56	82	168	56	57	50	75	130	36	111	76	106	93	44	94	121	84.6875	35.9939	51.3	0.605756
ENSG00000113721	PDGFRB	0.91	211	99	15	77	56	21	39	4	4	133	152	144	92	23	102	62	77.125	60.6651	2.56	0.0331929
ENSG00000114999	TTL	0.91	10	8	19	9	5	8	7	8	3	9	10	13	9	10	7	13	9.25	3.62399	0.887	0.0958919
ENSG00000115526	CHST10	0.91	3	9	19	4	3	3	4	4	0.4	2	5	16	10	1	9	8	6.275	5.27984	0.422	0.067251
ENSG00000116691	MIIP	0.91	7	15	6	9	7	3	5	17	5	8	21	26	14	11	25	12	11.9375	7.18766	0.27	0.0226178
ENSG00000117682	DHDDS	0.91	19	16	9	78	5	5	16	12	7	6	11	19	15	6	11	22	16.0625	17.3914	0.372	0.0231595
ENSG00000118518	RNF146	0.91	42	50	79	42	41	33	35	54	13	58	53	83	74	35	75	96	53.9375	22.2185	0.494	0.00915875
ENSG00000118705	RPN2	0.91	111	214	60	134	89	61	193	265	264	199	277	170	206	100	219	291	178.312	77.4887	205	1.14967
ENSG00000119414	PPP6C	0.91	90	96	87	127	52	33	55	143	23	68	69	93	74	148	102	115	85.9375	36.2298	43	0.500364
ENSG00000122482	ZNF644	0.91	11	19	25	13	17	9	14	31	6	15	23	41	36	9	33	36	21.125	11.242	0.448	0.0212071
ENSG00000123095	BHLHE41	0.91	14	26	124	82	14	7	10	2	0.2	17	31	60	54	30	27	118	38.5125	39.08	0.878	0.0227978
ENSG00000123268	ATF1	0.91	29	36	11	28	24	14	35	62	12	38	49	66	52	25	38	60	36.1875	17.6039	28.8	0.795855
ENSG00000124357	NAGK	0.91	8	21	8	11	7	3	11	48	3	10	27	21	17	3	17	12	14.1875	11.4381	186	13.1101
ENSG00000124444	ZNF576	0.91	5	9	10	7	6	3	5	6	4	3	8	14	14	2	10	10	7.25	3.69685	0.156	0.0215172
ENSG00000125482	TTF1	0.91	11	20	15	10	15	10	9	24	3	10	15	16	35	10	23	35	16.3125	9.09006	1.16	0.0711111
ENSG00000127418	FGFRL1	0.91	22	5	24	21	5	9	14	4	36	17	10	42	16	9	9	47	18.125	13.326	0.254	0.0140138
ENSG00000127472	PLA2G5	0.91	0.6	8	2	0.8	5	32	0.3	0.1	4	3	7	35	16	0.9	31	1	9.16875	12.3581	0.243	0.0265031
ENSG00000128159	TUBGCP6	0.91	7	19	11	8	4	3	7	7	2	9	27	16	13	5	10	15	10.1875	6.56474	0.282	0.027681
ENSG00000128791	TWSG1	0.91	34	53	33	40	63	13	89	15	6	91	57	114	138	11	93	87	58.5625	40.0083	2.7	0.0461046
ENSG00000129226	CD68	0.91	9	10	0.6	4	3	0.2	1	13	1	7	4	3	7	0.3	2	2	4.19375	3.89092	3.11	0.74158
ENSG00000130227	XPO7	0.91	34	33	39	34	26	18	28	56	12	32	38	60	50	27	61	51	37.4375	14.5601	43.9	1.17262
ENSG00000130313	PGLS	0.91	21	32	7	16	10	3	14	44	9	12	22	27	22	5	12	16	17	10.7517	227	13.3529
ENSG00000130589	HELZ2	0.91	3	5	1	2	1	1	2	16	1	7	5	4	2	0.2	1	3	3.3875	3.85087	0.828	0.244428
ENSG00000131788	PIAS3	0.91	15	20	14	13	7	5	14	9	2	17	22	48	34	11	21	15	16.6875	11.2825	0.732	0.0438652
ENSG00000131914	LIN28A	0.91	0.3	2	0.9	1	0.4	0.1	1	0.3	0.2	0.8	0.7	1	0.5	0.1	2	0.6	0.74375	0.583059	7.24	9.73445
ENSG00000132563	REEP2	0.91	5	2	64	8	8	2	1	0.2	0.1	1	2	7	11	1	13	2	7.95625	15.4795	0.888	0.11161
ENSG00000135341	MAP3K7	0.91	15	26	24	20	12	13	17	34	7	20	23	39	31	10	25	36	22	9.56382	5.55	0.252273
ENSG00000135829	DHX9	0.91	54	106	78	56	51	28	92	149	24	71	96	173	119	36	138	125	87.25	45.0992	295	3.38109
ENSG00000135945	REV1	0.91	8	20	12	11	7	19	11	11	3	15	15	30	26	7	22	20	14.8125	7.47635	0.036	0.00243038
ENSG00000138386	NAB1	0.91	29	36	32	69	42	13	25	23	15	43	49	55	52	6	65	54	38	18.7723	1.44	0.0378947
ENSG00000138867	GUCD1	0.91	78	69	19	76	36	60	53	75	103	44	40	49	58	77	51	57	59.0625	20.3092	0.118	0.00199788
ENSG00000139323	POC1B	0.91	6	10	16	7	8	3	9	17	3	15	14	11	10	1	11	9	9.375	4.70284	0.511	0.0545067
ENSG00000140368	PSTPIP1	0.91	2	9	1	2	0.4	0.4	1	30	0.3	5	20	2	1	0.2	1	1	4.76875	8.40474	1.23	0.257929
ENSG00000142168	SOD1	0.91	211	251	479	259	292	142	244	129	482	188	212	342	325	116	303	509	280.25	123.438	1074	3.83229
ENSG00000142528	ZNF473	0.91	2	5	2	3	3	1	4	5	2	4	5	8	7	5	46	5	6.6875	10.6503	0.155	0.0231776
ENSG00000142675	CNKSR1	0.91	0.6	2	0.9	4	1	0.2	4	0.5	0.2	7	4	6	7	22	2	22	5.2125	6.95594	1.58	0.303118
ENSG00000142949	PTPRF	0.91	47	15	31	111	23	0.8	28	0.4	53	40	17	73	58	1	23	43	35.2625	29.3311	7.49	0.212407
ENSG00000143870	PDIA6	0.91	68	150	29	66	95	26	125	77	162	86	131	137	91	27	82	406	109.875	89.6496	530	4.82366
ENSG00000143924	EML4	0.91	21	59	8	23	12	3	19	51	15	50	32	44	20	2	38	38	27.1875	17.8521	31.1	1.14391
ENSG00000147174	GCNA	0.91	0.3	3	1	2	0.3	0.5	4	0.9	0.5	1	8	1	1	0.3	17	26	4.175	7.23275	0.581	0.139162
ENSG00000149308	NPAT	0.91	7	15	10	6	5	4	7	39	2	11	17	15	15	4	16	17	11.875	8.90599	0.165	0.0138947
ENSG00000150455	TIRAP	0.91	7	11	4	7	4	2	4	15	4	2	6	17	11	3	5	7	6.8125	4.49027	0.386	0.0566606
ENSG00000150456	EEF1AKMT1	0.91	11	15	16	18	12	5	8	6	8	9	12	32	18	8	23	22	13.9375	7.30725	0.486	0.03487
ENSG00000150625	GPM6A	0.91	2	6	688	0.8	31	0.3	2	1	4	23	8	10	7	0.2	4	17	50.2687	170.29	11.7	0.232749
ENSG00000150681	RGS18	0.91	4	4	2	2	0.7	1	1	292	2	29	8	2	2	0.2	2	0.4	22.0188	72.3282	10.7	0.485949
ENSG00000151067	CACNA1C	0.91	2	7	6	2	6	11	1	0.1	0.1	4	3	3	13	0.3	5	1	4.03125	3.83053	0.047	0.0116589
ENSG00000151623	NR3C2	0.91	7	9	23	8	12	8	17	10	4	10	10	25	38	7	14	27	14.3125	9.31464	0.178	0.0124367
ENSG00000153786	ZDHHC7	0.91	60	50	24	42	33	21	43	134	9	45	58	56	61	32	35	74	48.5625	28.3948	0.43	0.00885457
ENSG00000153982	GDPD1	0.91	1	2	19	2	2	1	4	4	0.5	3	2	3	5	0.7	17	3	4.325	5.49818	1.11	0.256647
ENSG00000154001	PPP2R5E	0.91	25	22	28	23	22	11	19	37	8	30	24	41	39	20	31	36	26	9.45163	16.5	0.634615
ENSG00000154511	FAM69A	0.91	25	27	76	66	34	4	10	26	22	18	36	24	45	3	30	24	29.375	19.6939	0.144	0.00490213
ENSG00000154845	PPP4R1	0.91	19	26	11	16	13	11	20	37	6	32	22	43	28	10	45	29	23	11.9778	6.03	0.262174
ENSG00000160145	KALRN	0.91	10	6	22	4	3	4	2	0.8	2	3	3	3	3	1	5	4	4.7375	5.08945	0.164	0.0346174
ENSG00000162458	FBLIM1	0.91	25	112	4	15	25	21	24	0.3	1	51	68	99	46	2	91	17	37.5812	36.671	5.99	0.159388
ENSG00000162755	KLHDC9	0.91	1	2	11	2	4	2	9	0.4	0.5	6	0.7	5	15	0.1	45	7	6.91875	11.0333	0.203	0.0293406
ENSG00000163220	S100A9	0.91	939	242	42	23	51	73	75	19133	103	2756	825	41	209	23	114	66	1544.69	4741.31	1443	0.93417
ENSG00000163565	IFI16	0.91	94	176	28	50	59	17	22	185	6	113	156	114	71	11	71	48	76.3125	58.3332	152	1.99181
ENSG00000164574	GALNT10	0.91	11	20	8	14	12	4	11	33	3	13	20	65	12	3	14	35	17.375	15.7008	0.664	0.0382158
ENSG00000164631	ZNF12	0.91	9	21	18	16	14	8	18	29	5	13	22	45	25	4	17	29	18.3125	10.4417	0.138	0.00753584
ENSG00000165506	DNAAF2	0.91	5	12	8	9	9	5	14	14	8	7	13	17	13	4	22	15	10.9375	4.91893	0.519	0.0474514
ENSG00000166068	SPRED1	0.91	33	32	42	35	19	9	17	6	3	59	22	37	27	3	24	69	27.3125	18.8882	0.314	0.0114966
ENSG00000166278	C2	0.91	11	9	1	9	4	2	10	2	156	22	19	11	12	1	6	3	17.375	37.4787	285	16.4029
ENSG00000166341	DCHS1	0.91	13	16	2	7	9	3	3	2	1	20	12	23	17	0.7	6	3	8.60625	7.32307	0.12	0.0139434
ENSG00000166349	RAG1	0.91	0.5	0.4	0.3	1	0.6	0.4	2	0.5	0.5	0.3	0.7	0.7	2	0.1	1	2	0.8125	0.634429	0.005	0.00615385
ENSG00000166833	NAV2	0.91	7	7	13	8	6	3	9	0.1	5	9	4	5	6	0.7	4	17	6.4875	4.25909	0.965	0.148748
ENSG00000167136	ENDOG	0.91	5	5	6	5	2	6	9	3	7	3	3	3	4	12	4	8	5.3125	2.65126	2.34	0.440471
ENSG00000167333	TRIM68	0.91	6	8	7	8	6	4	14	12	5	5	10	15	14	4	13	14	9.0625	4.0244	0.184	0.0203034
ENSG00000168014	C2CD3	0.91	4	7	7	4	4	2	6	9	2	7	6	11	8	7	12	10	6.625	2.96367	0.119	0.0179623
ENSG00000168993	CPLX1	0.91	4	9	108	3	3	1	2	0.2	4	6	4	3	3	1	3	1	9.7	26.3003	2.02	0.208247
ENSG00000172270	BSG	0.91	309	165	200	175	167	246	165	148	48	168	128	253	296	114	366	226	198.375	80.7415	132	0.665406
ENSG00000173212	MAB21L3	0.91	0.6	0.5	0.9	0.2	0.2	0.4	1	0.2	0.6	0.2	0.4	0.2	3	0.2	0.6	1	0.6375	0.6927	0.022	0.0345098
ENSG00000174137	FAM53A	0.91	0.3	0.5	0.5	0.4	0.3	0.1	0.3	0.5	0.5	0.3	0.7	0.4	0.6	0.2	3	2	0.6625	0.755315	0.015	0.0226415
ENSG00000174915	PTDSS2	0.91	6	10	8	8	5	5	8	3	3	7	10	13	8	5	21	13	8.3125	4.52723	1.49	0.179248
ENSG00000174928	C3orf33	0.91	1	8	10	5	3	5	10	4	3	3	4	15	11	3	12	22	7.4375	5.60914	0.202	0.0271597
ENSG00000175104	TRAF6	0.91	7	12	8	9	6	6	11	23	4	13	11	15	12	8	13	13	10.6875	4.54193	2.13	0.199298
ENSG00000176454	LPCAT4	0.91	9	17	23	9	12	9	6	8	0.5	11	48	22	21	2	9	5	13.2188	11.4586	4.27	0.323026
ENSG00000176986	SEC24C	0.91	21	22	13	17	9	9	20	45	10	18	31	35	28	26	18	28	21.875	9.97246	69.2	3.16343
ENSG00000178033	CALHM5	0.91	4	9	0.8	8	2	2	4	0.7	0.1	2	4	2	4	0.5	6	3	3.25625	2.60435	1.75	0.537428
ENSG00000179044	EXOC3L1	0.91	4	9	1	3	0.7	0.9	2	0.6	0.9	3	3	5	2	0.4	3	4	2.65625	2.20211	0.335	0.126118
ENSG00000179456	ZBTB18	0.91	22	24	102	30	17	19	25	95	10	34	46	17	59	81	61	44	42.875	28.9963	0.713	0.0166297
ENSG00000180336	MEIOC	0.91	0.2	0.6	1	0.4	0.1	0.2	0.4	0.1	0.1	0.1	0.4	0.5	0.2	0.4	18	0.7	1.4625	4.41722	0.189	0.129231
ENSG00000185880	TRIM69	0.91	10	12	22	9	20	17	16	22	2	27	24	23	33	8	21	11	17.3125	8.14632	0.053	0.00306137
ENSG00000187601	MAGEH1	0.91	37	85	148	44	31	10	45	46	17	60	67	124	59	8	124	122	64.1875	44.1772	0.67	0.0104382
ENSG00000187699	C2orf88	0.91	2	3	15	9	11	8	12	23	3	3	8	7	10	8	22	10	9.625	6.18466	20.7	2.15065
ENSG00000188868	ZNF563	0.91	2	4	1	3	2	2	4	2	3	2	3	7	6	2	24	8	4.6875	5.5223	0.245	0.0522667
ENSG00000197044	ZNF441	0.91	2	9	8	4	2	2	10	7	3	1	5	25	14	1	5	14	7	6.40833	0.095	0.0135714
ENSG00000197562	RAB40C	0.91	7	7	14	6	5	1	7	9	3	6	5	11	14	6	12	11	7.75	3.76829	0.243	0.0313548
ENSG00000197714	ZNF460	0.91	6	5	8	3	1	3	1	3	0.9	5	3	9	4	3	5	5	4.05625	2.3318	0.82	0.202157
ENSG00000197780	TAF13	0.91	96	87	171	174	71	47	85	46	53	70	53	107	69	52	111	129	88.8125	40.8937	1.01	0.0113723
ENSG00000198231	DDX42	0.91	47	71	76	50	28	21	29	46	14	38	27	97	82	31	59	83	49.9375	25.3521	60.8	1.21752
ENSG00000198382	UVRAG	0.91	39	30	23	30	14	7	10	34	5	18	19	20	23	10	16	21	19.9375	9.75342	3.77	0.189091
ENSG00000206562	METTL6	0.91	3	6	13	6	4	2	5	5	1	2	5	11	7	2	11	6	5.5625	3.52077	0.108	0.0194157
ENSG00000213889	PPM1N	0.91	1	11	0.6	2	1	0.3	0.6	4	0.9	0.2	5	0.5	5	0.1	2	0.3	2.15625	2.88235	0.223	0.10342
ENSG00000232859	LYRM9	0.91	3	8	11	5	1	1	3	3	0.5	3	0.6	7	4	1	4	14	4.31875	3.90029	1.01	0.233864
ENSG00000244476	ERVFRD-1	0.91	0.3	0.9	0.1	0.7	0.3	0.1	0.7	0.1	0.7	0.8	0.7	0.3	0.9	0.1	0.4	0.6	0.48125	0.299374	0.186	0.386494
ENSG00000256043	CTSO	0.91	31	58	32	41	33	19	67	84	42	79	30	88	81	9	58	67	51.1875	24.828	0.584	0.011409
ENSG00000267680	ZNF224	0.91	3	12	7	5	2	1	5	5	0.8	4	10	8	8	0.5	4	8	5.20625	3.39813	0.056	0.0107563
ENSG00000005108	THSD7A	0.9	7	6	6	3	6	0.8	13	0.1	0.6	3	7	4	7	0.8	4	4	4.51875	3.31607	0.216	0.0478008
ENSG00000011105	TSPAN9	0.9	38	28	8	22	20	36	33	4	21	50	22	37	30	5	22	25	25.0625	12.5298	2.54	0.101347
ENSG00000035928	RFC1	0.9	22	30	32	24	20	10	19	39	10	21	24	48	37	10	36	51	27.0625	12.7408	12.9	0.476674
ENSG00000055955	ITIH4	0.9	0.1	1	0.3	0.3	0.1	0.1	0.1	0.1	19	0.5	1	0.2	0.5	0.1	0.9	0.8	1.56875	4.66086	1373	875.219
ENSG00000075975	MKRN2	0.9	32	36	45	30	22	21	26	51	12	35	36	66	46	19	91	58	39.125	20.1623	2.31	0.0590415
ENSG00000078596	ITM2A	0.9	81	92	121	156	101	84	23	137	4	211	179	160	139	24	161	113	111.625	58.8556	0.675	0.00604703
ENSG00000085117	CD82	0.9	27	64	20	21	9	6	20	53	16	78	48	34	38	12	13	16	29.6875	21.1399	5.89	0.1984
ENSG00000088854	C20orf194	0.9	13	11	27	16	11	11	16	7	2	10	11	21	34	15	18	15	14.875	7.64962	0.051	0.00342857
ENSG00000101856	PGRMC1	0.9	234	159	365	237	213	24	322	109	457	287	165	328	364	15	258	253	236.875	121.794	228	0.962533
ENSG00000102034	ELF4	0.9	22	28	2	11	10	3	6	128	1	42	29	33	15	1	8	5	21.5	31.1298	0.972	0.0452093
ENSG00000103066	PLA2G15	0.9	7	10	5	9	3	7	23	13	4	12	10	8	9	29	8	18	10.9375	6.98063	2.48	0.226743
ENSG00000103245	NARFL	0.9	3	8	4	3	2	2	4	3	2	2	6	6	5	2	4	5	3.8125	1.79699	2.75	0.721311
ENSG00000103811	CTSH	0.9	18	98	26	17	14	9	93	93	21	107	98	56	75	5	16	35	48.8125	38.3896	110	2.25352
ENSG00000104852	SNRNP70	0.9	43	115	54	50	29	16	47	25	21	72	122	107	73	19	53	106	59.5	36.0278	223	3.7479
ENSG00000104957	CCDC130	0.9	9	28	11	10	8	3	10	7	4	12	18	23	22	12	17	21	13.4375	7.25689	0.725	0.0539535
ENSG00000105583	WDR83OS	0.9	33	61	24	42	31	19	44	67	30	63	70	64	85	37	41	48	47.4375	18.8608	0.329	0.00693544
ENSG00000107937	GTPBP4	0.9	20	36	25	19	15	8	17	21	9	17	19	43	23	25	36	44	23.5625	10.9055	70.5	2.99204
ENSG00000107951	MTPAP	0.9	8	17	11	11	5	5	9	12	5	7	7	18	11	11	13	16	10.375	4.17732	9.01	0.868434
ENSG00000108474	PIGL	0.9	4	10	4	4	2	1	3	2	2	5	3	5	5	1	4	6	3.8125	2.22767	0.235	0.0616393
ENSG00000108576	SLC6A4	0.9	0.5	0.9	0.3	0.5	0.1	0.3	0.4	2	0.1	10	0.6	0.9	0.6	0.3	0.9	0.7	1.19375	2.3915	0.365	0.305759
ENSG00000109572	CLCN3	0.9	26	18	88	38	21	23	46	45	14	19	22	42	40	19	43	33	33.5625	18.2208	0.765	0.0227933
ENSG00000111880	RNGTT	0.9	9	21	15	14	10	5	12	40	8	12	39	22	23	5	27	17	17.4375	10.7453	12	0.688172
ENSG00000112118	MCM3	0.9	31	65	17	28	22	12	30	54	9	31	39	60	48	7	57	39	34.3125	18.5318	127	3.70128
ENSG00000112299	VNN1	0.9	6	3	0.2	2	0.2	0.6	27	22	86	18	12	4	4	1	3	1	11.875	21.4681	22.4	1.88632
ENSG00000115271	GCA	0.9	27	41	33	16	9	6	26	323	9	43	29	19	20	2	30	17	40.625	76.2434	49.5	1.21846
ENSG00000115363	EVA1A	0.9	0.3	0.5	0.5	2	0.2	0.2	24	0.1	43	23	1	2	0.9	0.1	4	2	6.4875	12.4126	0.283	0.0436224
ENSG00000116667	C1orf21	0.9	25	14	30	17	29	20	9	12	7	31	21	38	62	44	20	33	25.75	14.215	1.38	0.0535922
ENSG00000116786	PLEKHM2	0.9	47	57	84	31	23	34	20	38	8	50	46	50	39	104	49	68	46.75	23.9123	0.723	0.0154652
ENSG00000118257	NRP2	0.9	23	12	6	19	39	1	3	0.5	3	20	14	39	53	1	7	7	15.4688	15.9305	0.922	0.059604
ENSG00000118495	PLAGL1	0.9	7	7	2	10	5	2	6	5	0.6	12	7	15	10	1	10	4	6.475	4.13562	0.46	0.0710425
ENSG00000118939	UCHL3	0.9	6	15	6	17	7	4	13	9	8	7	6	9	9	7	22	26	10.6875	6.28987	127	11.883
ENSG00000120156	TEK	0.9	44	38	12	30	20	15	43	0.1	9	146	33	18	18	6	14	29	29.6938	33.6626	0.453	0.0152557
ENSG00000121879	PIK3CA	0.9	28	12	14	22	19	9	12	27	3	18	23	14	22	10	20	18	16.9375	6.82611	0.355	0.0209594
ENSG00000121988	ZRANB3	0.9	0.9	3	3	2	0.9	0.5	1	2	0.7	1	1	3	2	1	6	2	1.875	1.39308	0.107	0.0570667
ENSG00000122882	ECD	0.9	18	31	26	22	15	8	20	30	9	22	19	31	37	12	42	41	23.9375	10.68	5.62	0.234778
ENSG00000123472	ATPAF1	0.9	18	25	75	40	23	72	39	27	24	11	28	40	36	27	41	54	36.25	17.9165	7.42	0.20469
ENSG00000123552	USP45	0.9	4	9	5	4	3	3	6	3	2	3	7	11	7	3	5	6	5.0625	2.48914	0.577	0.113975
ENSG00000123595	RAB9A	0.9	22	34	33	54	25	18	38	52	15	41	49	42	41	10	25	46	34.0625	13.5915	17.3	0.50789
ENSG00000124216	SNAI1	0.9	7	24	3	6	5	0.9	4	1	2	38	11	6	7	2	6	9	8.24375	9.6625	1.27	0.154056
ENSG00000125037	EMC3	0.9	53	36	34	56	26	21	31	39	27	30	36	31	47	63	54	67	40.6875	14.0889	35.8	0.879877
ENSG00000126001	CEP250	0.9	3	9	7	3	3	2	3	9	0.9	3	7	11	6	2	9	4	5.11875	3.14732	2.6	0.507937
ENSG00000126464	PRR12	0.9	9	17	10	9	7	2	5	19	1	5	10	22	14	5	13	11	9.9375	5.94944	2.56	0.25761
ENSG00000126775	ATG14	0.9	18	39	25	27	17	13	13	17	4	11	14	24	34	29	38	48	23.1875	12.0179	0.622	0.0268248
ENSG00000130414	NDUFA10	0.9	20	28	39	30	14	33	28	20	15	16	21	34	23	10	25	36	24.5	8.5557	76	3.10204
ENSG00000130775	THEMIS2	0.9	17	47	9	9	3	4	5	184	4	32	39	6	6	1	10	5	23.8125	44.9091	2.43	0.102047
ENSG00000132740	IGHMBP2	0.9	4	10	4	5	4	2	3	5	2	4	7	6	9	7	26	5	6.4375	5.68001	0.751	0.11666
ENSG00000133067	LGR6	0.9	0.2	1	0.8	3	0.8	1	1	9	0.7	4	2	2	2	0.2	5	8	2.54375	2.68725	0.253	0.0994595
ENSG00000134198	TSPAN2	0.9	8	17	3	9	55	3	14	35	0.1	12	5	13	86	1	18	12	18.1938	22.8105	0.219	0.0120371
ENSG00000134283	PPHLN1	0.9	6	20	12	8	5	4	8	21	4	9	18	19	12	5	18	15	11.5	6.18601	13.1	1.13913
ENSG00000135636	DYSF	0.9	31	45	16	11	13	14	6	62	7	20	21	13	26	88	14	37	26.5	22.2351	6.92	0.261132
ENSG00000136122	BORA	0.9	0.9	5	2	2	1	0.4	2	8	1	0.7	4	3	1	0.2	7	2	2.5125	2.34517	0.114	0.0453731
ENSG00000136457	CHAD	0.9	1	2	2	2	1	0.2	3	1	6	13	2	4	2	1	2	4	2.8875	3.062	3.31	1.14632
ENSG00000136807	CDK9	0.9	49	94	26	34	22	13	20	50	24	55	49	93	45	19	51	47	43.1875	23.9812	15.4	0.356585
ENSG00000137198	GMPR	0.9	7	10	23	12	12	41	37	13	4	22	8	54	14	233	61	52	37.6875	55.2868	32.7	0.867662
ENSG00000137648	TMPRSS4	0.9	0.2	0.2	0.4	0.1	5	0.1	4	0.2	0.1	6	0.2	0.4	12	0.1	2	0.4	1.9625	3.30714	4.7	2.3949
ENSG00000140463	BBS4	0.9	6	13	12	8	5	6	13	6	5	11	8	17	21	5	24	25	11.5625	6.86021	0.171	0.0147892
ENSG00000141179	PCTP	0.9	12	10	3	9	10	3	17	21	28	7	7	10	12	3	16	9	11.0625	6.76726	3.2	0.289266
ENSG00000142676	RPL11	0.9	1456	2127	390	1072	1167	227	505	2083	422	1633	1726	2530	2244	532	1077	1238	1276.81	735.054	540	0.422928
ENSG00000143320	CRABP2	0.9	6	8	9	102	6	0.4	6	0.5	0.2	12	1	76	65	0.2	14	8	19.6438	31.506	99.7	5.07541
ENSG00000144559	TAMM41	0.9	4	7	3	4	2	1	3	4	2	2	7	8	6	1	4	5	3.9375	2.17466	5.86	1.48825
ENSG00000145908	ZNF300	0.9	1	7	2	3	2	0.8	6	2	0.5	2	3	15	6	0.6	7	9	4.18125	3.93721	0.065	0.0155456
ENSG00000147586	MRPS28	0.9	8	24	25	19	10	11	18	10	16	9	7	14	15	9	14	37	15.375	7.92359	48.6	3.16098
ENSG00000151502	VPS26B	0.9	21	18	41	23	14	11	12	45	15	11	26	40	28	10	30	21	22.875	11.36	8.58	0.375082
ENSG00000152455	SUV39H2	0.9	4	9	5	6	4	2	6	4	3	4	6	16	8	2	50	10	8.6875	11.5685	0.403	0.0463885
ENSG00000154719	MRPL39	0.9	36	70	44	45	44	39	49	32	43	21	31	59	49	35	191	79	54.1875	39.2755	26.7	0.492734
ENSG00000154767	XPC	0.9	18	29	16	17	10	4	14	35	6	12	23	44	37	16	25	60	22.875	14.9883	4.28	0.187104
ENSG00000154781	CCDC174	0.9	12	20	12	12	12	6	15	27	6	10	23	28	27	11	26	26	17.0625	7.99557	0.719	0.0421392
ENSG00000156453	PCDH1	0.9	28	25	18	17	16	9	37	4	19	39	23	7	11	2	6	22	17.6875	11.0858	2.95	0.166784
ENSG00000156860	FBRS	0.9	18	34	15	14	13	5	11	39	5	22	26	30	25	19	68	26	23.125	15.3878	1.11	0.048
ENSG00000156876	SASS6	0.9	2	7	3	4	3	1	4	5	1	1	6	7	5	2	14	6	4.4375	3.2857	0.833	0.187718
ENSG00000157014	TATDN2	0.9	10	23	12	11	7	4	10	31	4	12	22	24	12	4	10	16	13.25	7.94565	0.207	0.0156226
ENSG00000158292	GPR153	0.9	20	7	3	9	8	3	2	2	14	17	10	35	6	0.5	6	7	9.34375	8.77253	0.003	0.00032107
ENSG00000158711	ELK4	0.9	39	42	14	31	17	12	19	57	10	31	49	41	24	16	23	23	28	14.0807	0.31	0.0110714
ENSG00000160294	MCM3AP	0.9	16	28	14	18	9	10	13	26	7	12	24	29	20	28	17	26	18.5625	7.44731	3.09	0.166465
ENSG00000162368	CMPK1	0.9	179	158	132	263	151	70	125	249	192	207	151	124	260	72	106	236	167.188	62.8779	149	0.891215
ENSG00000162881	OXER1	0.9	0.8	4	0.2	2	2	0.2	2	10	8	1	1	6	6	0.4	3	2	3.0375	2.96937	0.467	0.153745
ENSG00000162980	ARL5A	0.9	37	39	40	35	31	34	29	58	15	41	35	43	49	35	30	66	38.5625	11.8489	0.518	0.0134327
ENSG00000163463	KRTCAP2	0.9	10	19	3	9	6	1	7	6	3	5	11	16	6	3	10	11	7.875	4.88365	12.2	1.54921
ENSG00000163661	PTX3	0.9	302	12	2	3	125	4	14	4	2	76	36	2	25	1	3	11	38.875	77.833	3.48	0.0895177
ENSG00000163704	PRRT3	0.9	1	2	9	1	0.5	0.3	1	2	0.2	2	2	5	4	1	2	4	2.3125	2.263	0.341	0.147459
ENSG00000164244	PRRC1	0.9	22	23	10	22	13	6	26	36	12	18	19	43	26	6	29	32	21.4375	10.5702	100	4.66472
ENSG00000165494	PCF11	0.9	10	33	13	18	8	6	18	42	5	15	34	33	21	7	24	44	20.6875	12.96	3.82	0.184653
ENSG00000166004	CEP295	0.9	2	6	4	3	1	2	3	5	0.5	2	4	5	6	1	10	7	3.84375	2.56722	0.024	0.0062439
ENSG00000166575	TMEM135	0.9	30	16	17	71	13	5	15	10	15	14	14	20	19	8	21	19	19.1875	14.9631	0.173	0.00901629
ENSG00000167083	GNGT2	0.9	1	11	2	2	0.2	0.7	3	18	0.9	4	6	2	2	0.5	0.9	2	3.5125	4.70459	1.15	0.327402
ENSG00000167118	URM1	0.9	21	36	18	21	16	9	17	25	12	15	22	19	22	6	22	31	19.5	7.51887	1.22	0.0625641
ENSG00000167208	SNX20	0.9	0.7	12	1	1	0.2	0.4	0.5	85	0.3	4	13	2	1	0.1	0.7	0.5	7.65	21.0181	0.574	0.0750327
ENSG00000168769	TET2	0.9	4	6	4	5	3	2	5	31	1	9	6	8	6	2	4	7	6.4375	6.90863	0.259	0.040233
ENSG00000170113	NIPA1	0.9	4	9	67	7	6	2	14	8	3	11	17	4	9	2	11	10	11.5	15.4056	0.466	0.0405217
ENSG00000170836	PPM1D	0.9	11	13	8	13	11	5	12	28	4	11	19	24	21	8	29	14	14.4375	7.65044	2.17	0.150303
ENSG00000172531	PPP1CA	0.9	61	117	24	50	36	23	62	230	36	42	74	61	45	57	50	111	67.4375	50.7556	151	2.23911
ENSG00000172943	PHF8	0.9	10	14	7	8	6	3	13	27	13	14	19	25	17	6	59	14	15.9375	13.2689	3.64	0.228392
ENSG00000172977	KAT5	0.9	14	29	20	15	12	6	13	22	5	14	12	31	34	15	32	47	20.0625	11.5324	0.785	0.0391277
ENSG00000173068	BNC2	0.9	3	4	0.5	5	7	0.6	4	0.6	0.1	4	4	73	15	1	15	4	8.8	17.7105	0.237	0.0269318
ENSG00000173334	TRIB1	0.9	27	35	6	68	11	9	37	35	25	96	29	18	18	15	12	195	39.75	47.5065	0.077	0.00193711
ENSG00000173692	PSMD1	0.9	68	71	107	78	40	44	54	57	38	47	40	99	62	80	93	110	68	24.4431	156	2.29412
ENSG00000174695	TMEM167A	0.9	59	52	84	92	37	28	69	149	36	67	60	75	48	16	58	69	62.4375	30.7028	3.37	0.053974
ENSG00000175213	ZNF408	0.9	4	8	3	3	2	2	3	11	4	2	6	6	6	8	6	9	5.1875	2.76209	2.26	0.435663
ENSG00000177311	ZBTB38	0.9	17	27	26	22	25	23	23	32	6	34	50	38	57	32	37	32	30.0625	12.1845	0.407	0.0135385
ENSG00000177426	TGIF1	0.9	12	8	2	10	13	2	13	11	3	23	19	10	21	9	14	12	11.375	6.14139	2.23	0.196044
ENSG00000177666	PNPLA2	0.9	363	44	12	426	37	48	21	49	13	58	74	29	62	92	31	73	89.5	121.689	1.19	0.0132961
ENSG00000177700	POLR2L	0.9	90	104	33	163	63	68	82	72	61	97	103	64	102	49	78	99	83	29.8619	6.34	0.0763855
ENSG00000178343	SHISA3	0.9	7	61	0.5	3	14	17	72	0.5	0.6	36	31	0.3	9	1	6	13	16.9937	22.1696	2.05	0.120633
ENSG00000178878	APOLD1	0.9	781	37	37	68	61	25	13	0.7	5	35	28	10	30	23	8	54	75.9813	189.035	2.81	0.0369828
ENSG00000178878	APOLD1	0.9	781	37	37	68	61	25	13	0.7	5	35	28	10	30	23	8	54	75.9813	189.035	0.419	0.00551452
ENSG00000178988	MRFAP1L1	0.9	65	134	173	66	69	31	80	155	38	66	107	194	109	26	111	167	99.4375	52.9528	0.686	0.00689881
ENSG00000179299	NSUN7	0.9	1	1	0.9	2	1	0.4	5	2	0.4	9	0.2	9	5	0.1	33	7	4.8125	8.13067	0.19	0.0394805
ENSG00000179627	ZBTB42	0.9	3	5	0.6	4	1	2	3	4	4	3	2	9	3	4	5	12	4.0375	2.86981	0.595	0.147368
ENSG00000180011	ZADH2	0.9	19	12	21	12	18	16	17	20	8	15	25	33	17	16	13	22	17.75	5.88218	2.46	0.138592
ENSG00000180104	EXOC3	0.9	13	21	17	16	15	8	11	23	5	11	14	25	27	31	27	25	18.0625	7.68087	9.77	0.5409
ENSG00000180357	ZNF609	0.9	13	12	12	8	11	5	7	27	3	26	20	28	22	5	26	16	15.0625	8.66001	2.28	0.151369
ENSG00000180357	ZNF609	0.9	13	12	12	8	11	5	7	27	3	26	20	28	22	5	26	16	15.0625	8.66001	0.552	0.0366473
ENSG00000180479	ZNF571	0.9	1	5	4	3	2	1	3	4	0.6	2	4	9	6	1	8	25	4.9125	5.90049	0.238	0.0484478
ENSG00000181817	LSM10	0.9	20	56	24	34	32	21	23	91	27	34	74	38	63	53	32	47	41.8125	20.634	0.062	0.00148281
ENSG00000185344	ATP6V0A2	0.9	5	18	6	7	3	2	5	9	3	5	9	12	6	5	6	10	6.9375	3.99114	2.77	0.399279
ENSG00000185630	PBX1	0.9	16	17	26	25	24	8	9	2	1	11	10	72	69	16	23	42	23.1875	21.1099	6.35	0.273854
ENSG00000185774	KCNIP4	0.9	0.6	2	69	2	8	0.6	13	0.6	0.2	1	0.8	5	5	0.3	2	7	7.31875	16.8341	1.18	0.16123
ENSG00000185875	THNSL1	0.9	2	5	11	7	3	3	11	6	13	3	4	26	10	3	24	12	8.9375	7.27982	3.36	0.375944
ENSG00000186567	CEACAM19	0.9	2	4	3	2	1	1	3	0.7	1	7	3	4	3	2	4	4	2.79375	1.625	0.269	0.0962864
ENSG00000187688	TRPV2	0.9	19	27	5	14	9	4	4	57	2	43	22	18	13	2	7	7	15.8125	15.5015	1.72	0.108775
ENSG00000188039	NWD1	0.9	0.2	0.5	8	0.4	0.3	0.1	0.4	0.1	0.1	5	0.3	9	4	0.2	4	1	2.1	2.98105	0.012	0.00571429
ENSG00000196466	ZNF799	0.9	1	7	3	3	2	0.7	3	4	1	3	3	5	5	0.5	3	3	2.95	1.74165	0.044	0.0149153
ENSG00000196549	MME	0.9	31	2	0.3	136	0.8	2	79	57	13	55	6	2	12	13	5	8	26.3813	37.8208	19.9	0.754324
ENSG00000197056	ZMYM1	0.9	6	13	5	12	6	3	10	13	3	5	12	27	15	2	16	12	10	6.44981	0.372	0.0372
ENSG00000197111	PCBP2	0.9	108	106	56	85	74	42	89	194	44	158	166	147	161	72	121	99	107.625	46.4326	258	2.39721
ENSG00000197471	SPN	0.9	2	19	2	4	0.8	0.8	2	230	1	11	30	4	2	0.3	1	2	19.4937	56.7199	10.1	0.518115
ENSG00000197555	SIPA1L1	0.9	6	16	29	8	7	1	10	26	6	13	9	14	10	2	24	20	12.5625	8.4061	1.97	0.156816
ENSG00000197818	SLC9A8	0.9	5	19	8	8	2	3	6	10	7	8	8	9	13	10	12	21	9.3125	5.08224	0.324	0.0347919
ENSG00000197860	SGTB	0.9	12	14	78	9	11	3	6	35	2	16	13	14	14	4	9	8	15.5	18.3194	5.36	0.345806
ENSG00000198000	NOL8	0.9	8	24	10	11	11	4	12	16	4	5	16	27	21	6	16	24	13.4375	7.50083	3.61	0.268651
ENSG00000198185	ZNF334	0.9	0.8	2	4	3	1	0.4	3	0.1	0.8	1	0.6	10	4	0.2	3	8	2.61875	2.84165	0.103	0.0393317
ENSG00000198825	INPP5F	0.9	9	13	178	9	10	3	10	8	1	9	14	30	19	9	25	14	22.5625	42.0982	1.16	0.0514127
ENSG00000198892	SHISA4	0.9	12	9	110	15	13	51	10	1	3	11	13	31	28	82	24	66	29.9375	31.391	0.208	0.00694781
ENSG00000198963	RORB	0.9	2	0.8	54	0.2	1	1	0.9	0.1	0.1	1	2	1	3	0.1	1	2	4.3875	13.2552	0.149	0.0339601
ENSG00000205413	SAMD9	0.9	4	15	1	5	5	3	6	94	2	7	18	15	9	1	7	8	12.5	22.3159	1.89	0.1512
ENSG00000205765	C5orf51	0.9	33	26	38	28	19	17	20	40	11	13	32	45	35	9	29	41	27.25	11.3402	5.05	0.185321
ENSG00000213096	ZNF254	0.9	3	7	7	4	3	3	7	5	3	8	7	11	9	0.4	7	23	6.7125	5.13963	0.064	0.00953445
ENSG00000221823	PPP3R1	0.9	89	73	384	89	51	17	37	139	25	80	62	108	81	48	89	70	90.125	84.2479	20.1	0.223024
ENSG00000221983	UBA52	0.9	275	393	108	212	202	74	97	588	118	365	381	378	391	326	247	216	273.188	140.482	1612	5.90071
ENSG00000236287	ZBED5	0.9	7	26	12	12	9	8	17	21	2	11	21	39	29	5	17	28	16.5	10.1915	0.359	0.0217576
ENSG00000237441	RGL2	0.9	22	34	10	23	15	11	19	17	5	44	66	35	44	20	15	40	26.25	16.2132	2.67	0.101714
ENSG00000243317	STMP1	0.9	19	25	23	30	14	18	26	58	14	23	21	35	40	16	45	51	28.625	13.5099	0.307	0.0107249
ENSG00000262814	MRPL12	0.9	14	38	11	26	14	16	21	8	27	13	10	26	15	13	18	33	18.9375	8.70608	40.5	2.13861
ENSG00000267385	AC011498.4	0.9	2	3	0.5	3	0.9	2	2	0.1	4	0.9	0.8	12	3	2	0.7	2	2.43125	2.7741	0	0
ENSG00000267796	LIN37	0.9	3	5	3	3	2	1	2	2	1	1	4	8	4	3	5	3	3.125	1.82117	2.53	0.8096
ENSG00000005471	ABCB4	0.89	0.6	3	0.2	0.7	1	2	0.2	2	44	0.3	2	0.2	0.9	0.5	0.6	0.9	3.69375	10.7796	0.353	0.0955668
ENSG00000006453	BAIAP2L1	0.89	5	4	1	5	6	1	7	0.2	7	22	3	6	11	2	21	18	7.45	6.99047	8.75	1.1745
ENSG00000037042	TUBG2	0.89	12	22	82	25	14	4	15	0.7	2	18	13	26	33	3	18	22	19.3562	19.1466	21.2	1.09525
ENSG00000047410	TPR	0.89	32	45	28	26	23	18	21	53	8	24	21	60	38	25	100	75	37.3125	24.099	83.1	2.22714
ENSG00000066739	ATG2B	0.89	8	15	17	9	6	5	12	11	7	8	11	18	10	9	18	18	11.375	4.48516	0.458	0.0402637
ENSG00000067365	METTL22	0.89	2	5	3	4	2	1	2	3	1	2	3	4	5	8	9	6	3.75	2.3523	0.125	0.0333333
ENSG00000068028	RASSF1	0.89	16	37	11	17	12	5	11	29	3	57	42	26	24	4	21	15	20.625	14.8678	0.509	0.0246788
ENSG00000074964	ARHGEF10L	0.89	6	14	9	10	7	8	17	12	16	7	7	10	18	18	7	18	11.5	4.60435	1.14	0.0991304
ENSG00000075539	FRYL	0.89	10	12	21	10	12	7	8	28	3	10	13	11	11	3	9	9	11.0625	6.1043	8.19	0.740339
ENSG00000077616	NAALAD2	0.89	3	1	4	5	0.9	0.5	1	0.7	0.3	3	3	5	2	0.5	7	2	2.43125	1.98854	0.493	0.202776
ENSG00000084676	NCOA1	0.89	30	31	59	25	21	16	25	75	8	31	34	71	47	36	46	22	36.0625	19.0314	0.421	0.0116742
ENSG00000087589	CASS4	0.89	1	2	0.3	1	0.3	0.4	1	28	0.6	4	3	3	0.4	0.2	0.6	0.4	2.8875	6.79714	11.1	3.84416
ENSG00000099290	WASHC2A	0.89	13	17	14	12	5	13	16	25	3	13	23	25	26	9	18	21	15.8125	6.95911	5.99	0.378814
ENSG00000100664	EIF5	0.89	58	112	149	91	69	60	72	85	100	49	87	107	100	22	128	215	94	44.9414	119	1.26596
ENSG00000101084	C20orf24	0.89	21	34	26	52	15	9	47	89	55	32	38	25	29	26	32	38	35.5	18.8892	2.19	0.0616901
ENSG00000101199	ARFGAP1	0.89	10	21	18	11	11	3	11	13	5	13	27	30	16	2	21	23	14.6875	8.19527	25.6	1.74298
ENSG00000103194	USP10	0.89	29	50	38	31	28	21	30	90	23	38	36	62	48	44	47	59	42.125	17.5533	47.4	1.12522
ENSG00000103978	TMEM87A	0.89	31	45	36	40	25	12	22	44	8	46	30	56	53	19	47	92	37.875	20.2941	3.23	0.0852805
ENSG00000104517	UBR5	0.89	29	31	24	25	17	14	18	40	5	31	24	35	33	19	61	39	27.8125	12.9472	7.55	0.271461
ENSG00000105063	PPP6R1	0.89	21	53	18	14	12	8	13	70	7	24	60	27	21	15	74	42	29.9375	22.4602	22	0.734864
ENSG00000105372	RPS19	0.89	130	357	51	100	234	30	80	469	78	331	477	238	336	110	144	144	206.812	146.267	276	1.33454
ENSG00000106263	EIF3B	0.89	41	73	24	42	33	15	27	44	26	25	33	69	52	69	56	74	43.9375	19.4404	150	3.41394
ENSG00000106268	NUDT1	0.89	10	16	7	11	8	2	3	11	0.8	5	8	7	9	7	19	7	8.175	4.71416	20.7	2.53211
ENSG00000107736	CDH23	0.89	1	2	2	3	0.4	0.4	0.2	2	2	2	1	9	1	0.1	2	0.7	1.8	2.09794	0.225	0.125
ENSG00000108639	SYNGR2	0.89	28	68	11	29	21	20	33	86	23	129	66	27	54	122	16	34	47.9375	36.8736	9.91	0.206728
ENSG00000108669	CYTH1	0.89	21	52	45	15	9	6	9	104	7	41	55	11	12	11	14	29	27.5625	26.3716	12.6	0.457143
ENSG00000108821	COL1A1	0.89	33	126	0.8	250	27	7	22	0.1	13	35	49	643	72	2	124	21	89.0563	161.675	41.1	0.461506
ENSG00000109670	FBXW7	0.89	7	15	67	17	5	10	5	15	2	10	14	12	8	8	28	12	14.6875	15.2216	0.067	0.0045617
ENSG00000110031	LPXN	0.89	5	45	7	12	3	3	7	106	6	33	77	18	21	1	9	12	22.8125	29.7371	10.2	0.447123
ENSG00000111647	UHRF1BP1L	0.89	18	14	41	15	13	7	11	37	11	21	13	22	20	15	26	25	19.3125	9.33609	0.795	0.041165
ENSG00000112977	DAP	0.89	52	82	27	44	35	16	97	93	132	118	88	119	135	9	67	145	78.6875	44.4503	40.7	0.517236
ENSG00000113851	CRBN	0.89	11	27	31	19	21	12	15	32	7	19	24	25	44	13	40	36	23.5	10.8995	3.8	0.161702
ENSG00000114209	PDCD10	0.89	25	33	35	31	24	15	32	63	11	38	32	35	36	5	59	48	32.625	15.4569	152	4.659
ENSG00000114423	CBLB	0.89	22	14	3	10	15	13	6	19	2	20	26	14	22	7	10	10	13.3125	7.08725	1.39	0.104413
ENSG00000115364	MRPL19	0.89	14	23	22	28	15	16	28	27	30	12	17	27	20	19	23	31	22	6.08824	38.7	1.75909
ENSG00000116586	LAMTOR2	0.89	28	51	21	40	30	10	31	64	45	30	28	31	43	30	26	31	33.6875	12.6001	112	3.32468
ENSG00000119328	FAM206A	0.89	14	19	16	20	18	10	18	25	9	14	12	29	31	11	34	29	19.3125	7.99766	0.736	0.03811
ENSG00000119812	FAM98A	0.89	29	25	42	47	24	21	34	15	15	19	30	53	31	34	91	42	34.5	18.7083	37.4	1.08406
ENSG00000119878	CRIPT	0.89	14	14	43	23	23	16	19	21	12	18	25	19	41	17	35	21	22.5625	9.31643	6.54	0.289861
ENSG00000120029	C10orf76	0.89	14	21	16	17	15	30	15	34	10	16	18	30	39	13	20	34	21.375	8.95824	5.38	0.251696
ENSG00000120071	KANSL1	0.89	11	18	9	10	7	4	7	27	2	12	20	21	20	12	27	16	13.9375	7.65479	1.36	0.0975785
ENSG00000122140	MRPS2	0.89	17	24	15	14	17	16	21	22	29	15	22	26	35	36	16	25	21.875	6.96539	50	2.28571
ENSG00000122176	FMOD	0.89	105	166	4	342	45	17	29	0.1	6	128	201	308	108	8	60	108	102.194	106.551	25.1	0.245612
ENSG00000123609	NMI	0.89	15	32	4	20	18	3	11	73	11	18	19	34	18	3	15	15	19.3125	16.7838	45.3	2.34563
ENSG00000125650	PSPN	0.89	1	2	2	2	2	0.7	3	3	1	2	6	6	4	0.9	2	2	2.475	1.61844	0.355	0.143434
ENSG00000125968	ID1	0.89	12	222	22	66	18	59	77	0.1	164	155	26	56	302	15	28	178	87.5062	89.4854	0.802	0.00916506
ENSG00000126351	THRA	0.89	22	19	80	31	41	14	20	11	3	18	23	48	59	25	33	34	30.0625	19.4267	0.082	0.00272765
ENSG00000127824	TUBA4A	0.89	10	41	92	11	12	30	28	96	16	40	47	21	26	129	23	66	43	35.1511	695	16.1628
ENSG00000127954	STEAP4	0.89	205	168	4	49	76	18	15	46	23	53	231	14	62	10	64	49	67.9375	70.5195	1.84	0.0270837
ENSG00000128045	RASL11B	0.89	1	8	22	0.5	1	2	26	0.3	0.4	1	4	42	5	0.7	29	0.8	8.98125	13.1353	2.31	0.257203
ENSG00000129422	MTUS1	0.89	63	17	48	29	30	44	20	0.6	24	21	25	42	45	34	24	44	31.9125	15.1522	12.3	0.385429
ENSG00000129696	TTI2	0.89	4	7	3	4	4	3	5	11	3	3	6	8	8	5	14	8	6	3.18329	1.74	0.29
ENSG00000129911	KLF16	0.89	10	20	15	9	8	2	7	27	9	20	16	29	6	1	15	6	12.5	8.27849	3.57	0.2856
ENSG00000132024	CC2D1A	0.89	13	13	9	13	8	4	9	9	4	10	15	21	19	14	16	15	12	4.80278	9.6	0.8
ENSG00000132694	ARHGEF11	0.89	19	14	24	17	8	9	12	26	6	10	13	30	22	10	30	21	16.9375	7.86103	3.21	0.18952
ENSG00000133026	MYH10	0.89	34	21	47	32	17	13	45	0.6	8	186	28	88	28	3	47	27	39.0375	44.6091	132	3.38136
ENSG00000133704	IPO8	0.89	25	40	17	24	28	11	31	57	18	24	29	63	53	17	45	51	33.3125	16.0902	6.64	0.199325
ENSG00000134202	GSTM3	0.89	21	27	70	45	31	21	63	6	4	60	28	184	136	17	258	95	66.625	70.7624	68.7	1.03114
ENSG00000134278	SPIRE1	0.89	12	7	39	9	9	12	12	2	3	17	6	16	16	35	26	20	15.0625	10.5985	0.908	0.0602822
ENSG00000135269	TES	0.89	25	87	3	30	94	9	32	159	5	60	50	16	130	5	70	58	52.0625	46.5668	54.6	1.04874
ENSG00000135931	ARMC9	0.89	0.9	3	3	1	4	0.3	3	0.1	0.2	4	2	10	5	0.3	7	5	3.05	2.77128	10.1	3.31148
ENSG00000137101	CD72	0.89	1	23	0.5	1	0.3	0.4	0.6	12	0.5	5	12	1	1	0.3	0.7	1	3.76875	6.43653	0.195	0.0517413
ENSG00000137801	THBS1	0.89	516	135	20	193	307	50	84	87	11	1241	142	197	147	11	55	41	202.312	305.966	539	2.6642
ENSG00000137962	ARHGAP29	0.89	30	26	7	28	9	8	23	0.7	6	41	16	16	14	3	15	27	16.8562	11.3295	1.23	0.07297
ENSG00000141965	FEM1A	0.89	1	3	2	3	1	2	1	2	0.3	0.6	3	3	2	23	2	8	3.55625	5.47783	0.102	0.0286819
ENSG00000143398	PIP5K1A	0.89	19	45	24	23	12	14	22	33	9	38	28	41	33	14	45	33	27.0625	11.7613	3.18	0.117506
ENSG00000145708	CRHBP	0.89	1	12	9	12	0.4	2	17	0.1	65	0.9	3	5	3	0.2	3	3	8.5375	15.8825	2.18	0.255344
ENSG00000145982	FARS2	0.89	8	22	8	14	7	9	11	21	9	12	8	15	24	14	20	32	14.625	7.24684	2.48	0.169573
ENSG00000145996	CDKAL1	0.89	11	14	8	11	6	4	7	17	3	10	12	27	15	7	17	22	11.9375	6.53676	4.47	0.37445
ENSG00000148290	SURF1	0.89	32	72	43	42	33	21	46	62	47	45	34	36	73	35	51	59	45.6875	14.6866	7.01	0.153434
ENSG00000151353	TMEM18	0.89	11	23	12	16	9	3	10	15	5	10	17	29	28	7	21	26	15.125	8.20467	0.391	0.0258512
ENSG00000151503	NCAPD3	0.89	4	6	5	5	2	3	4	11	3	4	8	5	8	3	8	9	5.5	2.58199	8.71	1.58364
ENSG00000152284	TCF7L1	0.89	38	29	5	32	26	5	7	0.4	5	20	20	41	28	7	34	20	19.8375	13.3735	0.357	0.0179962
ENSG00000153046	CDYL	0.89	19	19	14	14	16	7	12	25	4	14	20	21	32	19	22	24	17.625	6.90773	6.5	0.368794
ENSG00000153064	BANK1	0.89	4	105	0.9	8	1	0.1	2	42	0.1	5	61	2	3	0.1	5	18	16.075	29.267	1.63	0.1014
ENSG00000155545	MIER3	0.89	12	19	17	14	16	7	20	22	7	19	27	44	26	10	45	24	20.5625	11.1533	0.538	0.0261641
ENSG00000157191	NECAP2	0.89	26	52	11	20	13	5	16	80	9	46	48	48	29	2	29	22	28.5	21.1818	49.1	1.72281
ENSG00000157483	MYO1E	0.89	21	17	14	11	17	4	17	8	8	22	16	15	24	5	21	16	14.75	6.0608	52.4	3.55254
ENSG00000157657	ZNF618	0.89	3	6	1	5	2	0.8	8	2	2	2	3	14	4	0.4	5	8	4.1375	3.53928	0.762	0.184169
ENSG00000157869	RAB28	0.89	19	23	30	25	20	15	21	31	6	38	28	53	35	7	72	34	28.5625	16.4842	1.15	0.0402626
ENSG00000157954	WIPI2	0.89	18	24	19	21	11	7	16	33	8	17	19	16	21	9	30	27	18.5	7.58068	4.85	0.262162
ENSG00000159479	MED8	0.89	28	31	25	29	17	6	27	41	24	35	33	34	40	10	33	36	28.0625	9.92283	6.11	0.217728
ENSG00000160062	ZBTB8A	0.89	8	10	7	7	4	3	5	0.7	2	5	4	15	11	2	8	14	6.60625	4.23642	0.047	0.00711447
ENSG00000160613	PCSK7	0.89	6	20	4	5	5	1	3	5	1	6	11	8	8	1	4	4	5.75	4.66905	0.173	0.030087
ENSG00000162551	ALPL	0.89	88	37	20	15	12	7	19	64	49	48	38	7	7	1	17	18	27.9375	24.1674	5.95	0.212975
ENSG00000162714	ZNF496	0.89	9	11	6	6	6	3	4	4	1	9	8	17	11	8	14	17	8.375	4.71699	0.405	0.0483582
ENSG00000162745	OLFML2B	0.89	25	41	4	28	15	2	6	3	0.8	26	44	13	14	2	46	29	18.675	15.7872	0.362	0.0193842
ENSG00000163083	INHBB	0.89	517	15	5	72	99	5	2	1	4	11	60	12	20	18	34	44	57.4375	125.822	0.25	0.00435256
ENSG00000163607	GTPBP8	0.89	5	9	6	6	8	7	7	14	3	5	9	14	9	6	21	14	8.9375	4.63995	0.762	0.0852587
ENSG00000163814	CDCP1	0.89	0.9	2	1	2	2	0.3	5	0.6	0.4	11	2	3	8	0.3	4	13	3.46875	3.91573	0.688	0.198342
ENSG00000164078	MST1R	0.89	0.4	1	0.2	1	2	0.3	0.6	0.1	0.1	4	0.4	1	3	0.2	2	2	1.14375	1.15295	0.232	0.202842
ENSG00000165806	CASP7	0.89	38	25	10	32	28	6	32	25	6	66	41	40	29	8	26	26	27.375	15.4957	25.6	0.93516
ENSG00000166479	TMX3	0.89	27	40	34	32	24	14	30	39	7	37	39	34	37	7	24	31	28.5	10.8197	31.9	1.1193
ENSG00000167637	ZNF283	0.89	2	4	3	3	2	3	4	3	0.6	1	2	7	3	0.7	3	5	2.89375	1.63032	0.061	0.0210799
ENSG00000168005	C11orf84	0.89	4	10	7	4	10	3	4	5	0.9	20	29	15	15	2	36	6	10.6813	10.1107	2.96	0.277121
ENSG00000168038	ULK4	0.89	4	4	1	2	2	2	1	1	0.6	7	0.9	5	2	0.1	18	4	3.4125	4.31939	0.072	0.0210989
ENSG00000168961	LGALS9	0.89	6	37	3	8	10	3	3	86	2	23	22	11	10	1	7	3	14.6875	21.3502	22.7	1.54553
ENSG00000169105	CHST14	0.89	15	20	4	9	7	4	7	15	4	8	15	26	21	2	12	16	11.5625	7.06134	0.736	0.0636541
ENSG00000169299	PGM2	0.89	12	16	5	11	21	5	21	54	9	36	20	21	43	0.9	18	20	19.5562	14.24	119	6.08501
ENSG00000169385	RNASE2	0.89	47	7	5	0.4	0.5	2	2	204	3	40	19	5	4	0.5	4	1	21.525	50.677	208	9.66318
ENSG00000170379	TCAF2	0.89	2	7	2	2	1	0.5	3	7	3	5	6	3	3	0.7	2	6	3.325	2.18861	1.6	0.481203
ENSG00000170421	KRT8	0.89	4	4	1	38	68	15	106	0.2	96	132	7	41	78	0.1	22	306	57.3937	78.9225	711	12.3881
ENSG00000170681	CAVIN4	0.89	0.3	2	2	11	0.4	38	0.4	0.5	0.5	0.5	3	1	0.7	59	13	108	15.0188	29.7654	0.568	0.0378194
ENSG00000170779	CDCA4	0.89	6	14	2	6	4	1	3	13	1	5	12	12	7	1	24	5	7.25	6.27694	0.712	0.0982069
ENSG00000172071	EIF2AK3	0.89	12	15	7	10	9	5	21	24	6	18	25	19	21	7	12	20	14.4375	6.76233	0.142	0.0098355
ENSG00000172183	ISG20	0.89	11	21	1	2	3	0.3	0.8	22	0.8	36	37	5	3	0.4	1	5	9.33125	12.6316	121	12.9672
ENSG00000172315	TP53RK	0.89	8	20	12	10	8	4	14	53	7	12	20	35	19	6	19	18	16.5625	12.3934	12.2	0.736604
ENSG00000173960	UBXN2A	0.89	10	15	9	15	12	10	9	12	3	12	15	17	17	12	13	16	12.3125	3.64635	0.96	0.0779695
ENSG00000174243	DDX23	0.89	23	70	36	31	36	12	31	68	17	52	81	68	62	29	55	81	47	22.8269	46	0.978723
ENSG00000175073	VCPIP1	0.89	17	21	27	18	8	7	14	62	6	12	23	21	14	15	24	25	19.625	13.0275	4.39	0.223694
ENSG00000176248	ANAPC2	0.89	6	15	8	9	3	3	8	9	4	6	12	15	11	4	20	15	9.25	5.05305	1.2	0.12973
ENSG00000176410	DNAJC30	0.89	7	20	10	13	4	6	10	9	10	2	6	19	16	8	20	27	11.6875	6.90622	0.852	0.0728984
ENSG00000177728	TMEM94	0.89	12	18	24	12	6	6	10	13	5	17	22	26	16	21	16	26	15.625	6.95581	0.231	0.014784
ENSG00000177879	AP3S1	0.89	71	57	54	75	72	24	39	60	28	66	74	115	112	18	100	78	65.1875	28.8842	46.5	0.713327
ENSG00000179397	CATSPERE	0.89	0.2	1	2	0.8	0.3	0.1	0.8	0.6	0.3	0.5	0.9	1	1	0.2	26	1	2.29375	6.33924	0.025	0.0108992
ENSG00000180891	CUEDC1	0.89	10	14	12	19	7	11	11	4	1	10	6	14	22	21	7	20	11.8125	6.23131	1.35	0.114286
ENSG00000184402	SS18L1	0.89	5	7	23	10	4	4	14	4	14	9	16	16	14	4	15	12	10.6875	5.71219	1.4	0.130994
ENSG00000186314	PRELID2	0.89	2	2	0.7	2	1	2	0.6	0.6	0.5	1	2	4	3	0.2	2	2	1.6	1.01784	0.155	0.096875
ENSG00000187713	TMEM203	0.89	30	75	37	37	30	25	45	86	34	27	52	79	66	27	39	64	47.0625	20.4987	0.002	4.24967e-05
ENSG00000188785	ZNF548	0.89	11	20	6	12	5	6	7	11	1	12	14	23	20	4	13	15	11.25	6.25566	0.043	0.00382222
ENSG00000189050	RNFT1	0.89	6	10	4	23	5	4	12	19	17	5	9	15	9	3	58	15	13.375	13.326	0.705	0.0527103
ENSG00000196208	GREB1	0.89	1	1	7	3	0.5	1	0.9	0.2	1	0.4	0.9	64	3	0.2	21	1	6.63125	16.1401	0.403	0.0607729
ENSG00000196458	ZNF605	0.89	1	6	4	3	2	3	7	3	1	2	5	12	7	1	4	7	4.25	2.97769	0.031	0.00729412
ENSG00000196547	MAN2A2	0.89	21	22	39	19	12	11	9	16	12	16	30	18	18	32	19	29	20.1875	8.41601	1.23	0.0609288
ENSG00000197043	ANXA6	0.89	151	208	114	233	123	49	65	326	85	119	176	154	241	135	104	108	149.438	72.5442	1385	9.26809
ENSG00000197380	DACT3	0.89	4	20	37	2	22	6	4	0.4	0.5	19	13	35	49	2	18	5	14.8063	14.8925	0.624	0.0421444
ENSG00000198756	COLGALT2	0.89	0.1	2	38	1	3	2	1	2	0.1	4	3	3	2	1	4	6	4.5125	9.06354	0.308	0.0682548
ENSG00000198874	TYW1	0.89	7	12	10	9	7	4	12	14	6	9	12	31	19	11	11	17	11.9375	6.39238	0.405	0.0339267
ENSG00000213024	NUP62	0.89	15	24	10	14	10	5	11	35	7	14	20	29	21	19	30	17	17.5625	8.60208	46	2.61922
ENSG00000214013	GANC	0.89	4	6	3	4	2	2	3	8	3	7	5	6	6	2	6	8	4.6875	2.08866	0.246	0.05248
ENSG00000237765	FAM200B	0.89	11	11	31	19	13	5	17	21	5	13	18	27	23	3	24	24	16.5625	8.31039	0	0
ENSG00000254996	ANKHD1-EIF4EBP3	0.89	0.8	2	0.6	1	0.8	0.4	1	0.8	0.4	1	2	2	1	0.7	1	1	1.03125	0.521177	2.67	2.58909
ENSG00000002587	HS3ST1	0.88	0.5	5	2	0.7	0.8	0.4	5	1	0.2	3	3	22	4	0.4	6	1	3.4375	5.30834	0.005	0.00145455
ENSG00000004975	DVL2	0.88	9	14	7	9	7	3	8	9	2	10	17	33	23	7	21	19	12.375	8.25328	2.93	0.236768
ENSG00000006451	RALA	0.88	49	60	48	82	49	19	39	63	13	126	52	94	60	17	67	53	55.6875	28.7929	58.6	1.0523
ENSG00000010327	STAB1	0.88	33	88	2	18	5	7	8	17	25	9	39	11	20	2	11	7	18.875	21.3069	1.64	0.0868874
ENSG00000051596	THOC3	0.88	3	4	5	2	3	0.3	3	5	1	3	5	3	4	0.8	9	9	3.75625	2.50306	18.8	5.00499
ENSG00000069248	NUP133	0.88	23	28	28	22	15	13	23	38	7	13	22	45	34	21	33	41	25.375	10.7696	29.9	1.17833
ENSG00000072756	TRNT1	0.88	7	15	9	9	7	4	15	12	4	9	13	16	14	3	12	16	10.3125	4.438	50.4	4.88727
ENSG00000072849	DERL2	0.88	14	24	12	21	9	4	27	23	16	17	22	34	20	6	33	23	19.0625	8.70608	12.9	0.676721
ENSG00000073331	ALPK1	0.88	5	12	3	4	4	1	5	9	1	8	8	13	9	2	4	6	5.875	3.6492	0.015	0.00255319
ENSG00000075702	WDR62	0.88	0.4	2	0.6	1	0.1	6	0.2	0.2	0.1	0.5	0.9	0.8	0.3	0.1	41	0.9	3.44375	10.1176	1.47	0.42686
ENSG00000077782	FGFR1	0.88	36	23	10	40	31	15	14	1	3	55	29	80	53	5	27	19	27.5625	21.5282	5.42	0.196644
ENSG00000081041	CXCL2	0.88	5	149	2	38	0.7	6	8	0.8	180	93	33	9	11	2	9	2	34.2812	56.2144	2.39	0.0697174
ENSG00000091409	ITGA6	0.88	211	89	40	126	57	27	58	51	10	69	80	40	82	13	91	73	69.8125	48.473	48.5	0.694718
ENSG00000093000	NUP50	0.88	31	36	20	18	12	5	19	88	14	22	31	32	20	7	32	25	25.75	18.9895	67.8	2.63301
ENSG00000100292	HMOX1	0.88	50	97	9	31	8	4	67	150	143	105	128	144	20	23	19	36	64.625	54.3922	23.5	0.363636
ENSG00000100865	CINP	0.88	10	16	19	12	7	4	7	13	8	7	8	17	12	4	18	17	11.1875	5.03612	4.35	0.388827
ENSG00000101888	NXT2	0.88	9	16	11	21	8	2	12	40	6	13	16	15	18	2	56	22	16.6875	13.8791	1.16	0.0695131
ENSG00000104888	SLC17A7	0.88	3	3	209	2	2	0.6	0.2	0.1	0.1	0.5	2	0.4	3	0.9	2	1	14.3625	51.9141	0.495	0.0344648
ENSG00000105248	CCDC94	0.88	14	44	13	19	8	5	12	25	10	9	12	34	20	11	25	39	18.75	11.6705	6.4	0.341333
ENSG00000105486	LIG1	0.88	2	10	3	3	0.9	0.6	2	6	1	4	8	7	4	2	9	8	4.40625	3.13613	28	6.35461
ENSG00000105619	TFPT	0.88	17	26	28	16	20	4	9	13	6	14	18	21	17	8	20	19	16	6.76264	8.68	0.5425
ENSG00000105699	LSR	0.88	16	28	4	15	13	1	21	11	56	27	18	18	22	1	35	53	21.1875	16.0467	10.9	0.514454
ENSG00000106003	LFNG	0.88	2	18	5	17	6	1	3	131	0.8	8	12	3	11	0.7	5	3	14.1562	31.6394	0.596	0.0421015
ENSG00000107864	CPEB3	0.88	3	3	30	8	4	5	9	6	16	6	4	7	7	22	15	9	9.625	7.54431	0.639	0.0663896
ENSG00000108094	CUL2	0.88	18	34	29	23	20	16	21	32	11	18	21	33	44	31	61	37	28.0625	12.4711	41.4	1.47528
ENSG00000108306	FBXL20	0.88	13	13	20	19	7	5	7	19	2	8	12	14	15	6	19	11	11.875	5.64358	1.38	0.116211
ENSG00000108515	ENO3	0.88	1	3	0.8	128	0.6	122	3	0.7	21	1	6	1	3	395	15	377	67.3812	131.025	514	7.62823
ENSG00000109736	MFSD10	0.88	16	28	3	14	15	4	11	23	2	24	34	29	30	4	12	21	16.875	10.5127	1.71	0.101333
ENSG00000110104	CCDC86	0.88	28	34	15	16	11	5	11	11	8	12	14	35	16	17	61	35	20.5625	14.5234	58.7	2.85471
ENSG00000110697	PITPNM1	0.88	7	13	15	4	4	5	14	33	2	18	22	10	5	1	7	9	10.5625	8.43776	1.29	0.12213
ENSG00000111181	SLC6A12	0.88	0.4	1	10	0.4	0.3	0.2	48	4	20	1	2	2	0.9	0.1	3	16	6.83125	12.5156	0.08	0.0117109
ENSG00000111775	COX6A1	0.88	86	139	246	99	122	29	205	149	187	190	161	87	193	14	140	129	136	62.8724	17.6	0.129412
ENSG00000113272	THG1L	0.88	12	24	5	9	19	2	6	22	4	8	13	21	30	5	18	28	14.125	9.09853	1.75	0.123894
ENSG00000113593	PPWD1	0.88	13	41	20	22	16	7	17	36	6	11	29	46	25	7	27	35	22.375	12.532	11.6	0.518436
ENSG00000113615	SEC24A	0.88	19	17	10	23	11	5	20	25	25	20	31	30	19	10	19	24	19.25	7.32575	26.5	1.37662
ENSG00000115761	NOL10	0.88	19	33	12	20	16	10	20	21	10	14	17	29	25	24	34	38	21.375	8.5936	9.06	0.42386
ENSG00000117020	AKT3	0.88	49	21	51	21	51	9	17	17	3	44	33	50	55	6	35	39	31.3125	17.8838	2.45	0.0782435
ENSG00000117228	GBP1	0.88	13	23	9	22	16	5	11	80	8	163	22	38	52	4	17	11	30.875	40.4176	66.3	2.14737
ENSG00000117362	APH1A	0.88	99	143	42	81	37	24	67	158	52	115	69	142	81	29	52	159	84.375	46.4096	2.45	0.029037
ENSG00000117984	CTSD	0.88	367	344	108	273	101	181	461	428	268	376	274	312	314	540	147	316	300.625	123.601	187	0.622037
ENSG00000118162	KPTN	0.88	4	11	5	7	3	1	6	4	3	4	11	4	7	2	6	8	5.375	2.8954	0.941	0.17507
ENSG00000119042	SATB2	0.88	3	2	13	3	6	0.4	3	0.5	1	0.4	2	3	3	2	5	2	3.08125	3.06229	1.93	0.626369
ENSG00000119705	SLIRP	0.88	18	30	33	18	23	25	31	17	23	18	20	19	32	19	33	23	23.875	5.98749	158	6.6178
ENSG00000119986	AVPI1	0.88	27	8	22	40	16	4	8	3	16	36	17	55	57	9	17	18	22.0625	16.8185	0.277	0.0125552
ENSG00000120324	PCDHB10	0.88	4	4	11	3	5	0.9	2	0.2	0.3	4	4	10	10	0.7	5	2	4.13125	3.46751	0.065	0.0157337
ENSG00000120860	WASHC3	0.88	14	22	30	22	20	11	25	21	10	14	25	30	40	9	102	26	26.3125	21.841	4.9	0.186223
ENSG00000120915	EPHX2	0.88	6	10	9	20	11	6	39	6	51	9	8	37	40	4	14	19	18.0625	15.0531	13	0.719723
ENSG00000121653	MAPK8IP1	0.88	6	4	145	7	5	2	11	0.2	1	6	6	27	12	1	40	11	17.7625	35.4927	0.025	0.00140746
ENSG00000123342	MMP19	0.88	10	9	0.4	15	3	2	3	0.5	2	19	6	17	6	0.1	4	4	6.3125	6.04901	0.359	0.0568713
ENSG00000124587	PEX6	0.88	13	15	13	13	17	6	11	28	7	11	47	44	35	6	14	23	18.9375	12.9742	1.16	0.0612541
ENSG00000125149	C16orf70	0.88	4	9	12	5	3	3	8	15	12	4	7	10	11	9	10	7	8.0625	3.58643	1.36	0.168682
ENSG00000125812	GZF1	0.88	7	15	23	7	7	9	13	9	4	9	13	35	19	7	26	14	13.5625	8.41403	0.409	0.0301567
ENSG00000128606	LRRC17	0.88	2	6	2	8	1	3	4	0.4	0.8	2	9	46	7	0.4	24	3	7.4125	11.8063	0.325	0.0438449
ENSG00000130305	NSUN5	0.88	10	19	9	9	6	2	7	13	3	5	18	18	12	12	16	18	11.0625	5.61508	5.62	0.508023
ENSG00000130348	QRSL1	0.88	6	20	11	8	5	8	13	16	8	5	13	18	9	10	13	18	11.3125	4.78496	5.26	0.464972
ENSG00000130518	KIAA1683	0.88	0.7	3	0.4	4	0.6	0.2	1	1	0.7	0.7	2	9	1	0.1	15	3	2.65	3.97224	0.201	0.0758491
ENSG00000130653	PNPLA7	0.88	4	1	4	7	1	1	0.8	0.5	0.7	1	1	3	4	6	1	4	2.5	2.08774	0.072	0.0288
ENSG00000130779	CLIP1	0.88	26	21	22	23	30	16	17	22	6	37	17	22	47	132	23	89	34.375	32.0559	17.4	0.506182
ENSG00000130856	ZNF236	0.88	3	5	4	4	3	2	3	8	1	3	6	8	6	3	13	5	4.8125	2.94887	0.049	0.0101818
ENSG00000132004	FBXW9	0.88	2	4	3	3	0.8	0.7	3	2	1	7	1	4	4	2	8	5	3.15625	2.14071	1.05	0.332673
ENSG00000132359	RAP1GAP2	0.88	3	3	25	3	4	12	7	46	0.6	6	8	10	5	0.1	6	8	9.16875	11.4231	10	1.09066
ENSG00000132386	SERPINF1	0.88	348	179	50	493	187	71	23	6	370	126	436	389	290	138	404	180	230.625	159.419	1075	4.66125
ENSG00000133789	SWAP70	0.88	96	83	24	43	62	15	31	52	4	77	63	29	64	12	33	47	45.9375	26.824	92	2.00272
ENSG00000135587	SMPD2	0.88	4	11	4	6	4	1	9	8	3	14	12	11	15	3	36	13	9.625	8.31765	0.432	0.0448831
ENSG00000137393	RNF144B	0.88	28	20	9	28	10	9	29	49	9	55	15	9	21	30	15	131	29.1875	30.5292	0	0
ENSG00000137802	MAPKBP1	0.88	3	7	6	5	2	2	3	5	0.9	4	7	10	10	1	8	7	5.05625	2.96377	0.205	0.0405439
ENSG00000138078	PREPL	0.88	9	15	222	27	25	25	40	19	8	19	24	60	46	10	43	49	40.0625	50.9359	4.21	0.105086
ENSG00000138777	PPA2	0.88	17	29	22	26	15	20	38	20	23	26	20	32	31	5	24	51	24.9375	10.331	150	6.01504
ENSG00000140057	AK7	0.88	1	2	5	1	0.8	0.2	5	0.1	1	15	0.7	9	1	0.5	10	4	3.51875	4.34607	0.069	0.0196092
ENSG00000140398	NEIL1	0.88	2	7	2	4	1	0.7	3	0.8	2	3	9	6	6	0.2	2	6	3.41875	2.62252	0.206	0.0602559
ENSG00000143226	FCGR2A	0.88	52	16	15	12	4	4	10	253	4	66	24	14	19	2	9	4	31.75	61.6155	8.81	0.27748
ENSG00000143575	HAX1	0.88	55	85	61	71	61	69	69	70	62	65	84	109	128	92	119	116	82.25	23.6432	15.5	0.18845
ENSG00000144034	TPRKB	0.88	15	42	17	26	22	18	24	20	15	15	25	48	36	9	61	33	26.625	14.0517	27.5	1.03286
ENSG00000145990	GFOD1	0.88	38	12	31	14	7	15	4	6	3	10	14	4	10	18	3	8	12.3125	9.87737	2.9	0.235533
ENSG00000146350	TBC1D32	0.88	0.4	3	3	2	0.5	0.4	2	2	0.1	2	0.8	4	4	0.4	5	3	2.0375	1.5266	0.028	0.0137423
ENSG00000147162	OGT	0.88	25	77	26	43	18	24	43	47	11	51	95	61	50	18	23	91	43.9375	26.1418	23.2	0.528023
ENSG00000148225	WDR31	0.88	1	3	5	3	1	8	5	0.5	0.6	3	1	9	3	2	9	9	3.94375	3.18077	0.557	0.141236
ENSG00000148331	ASB6	0.88	7	16	14	6	4	2	10	13	3	7	15	16	11	5	11	11	9.4375	4.67574	0.736	0.0779868
ENSG00000148672	GLUD1	0.88	137	133	382	141	115	65	184	204	754	262	128	179	209	62	111	161	201.688	166.472	228	1.13046
ENSG00000149599	DUSP15	0.88	0.8	0.6	2	0.5	0.2	0.5	8	0.1	0.1	0.5	0.3	2	2	0.1	22	3	2.66875	5.51939	0.48	0.179859
ENSG00000151304	SRFBP1	0.88	10	15	11	10	9	5	12	17	5	10	9	21	16	7	14	23	12.125	5.22653	2.44	0.201237
ENSG00000151650	VENTX	0.88	1	2	0.7	1	0.3	0.6	1	11	0.2	2	2	5	0.8	0.1	1	1	1.85625	2.70184	0.431	0.232189
ENSG00000152137	HSPB8	0.88	24	68	239	103	171	233	73	0.2	2	252	55	60	501	510	57	499	177.95	180.483	5.85	0.0328744
ENSG00000152784	PRDM8	0.88	2	4	26	1	4	0.8	1	5	0.1	2	5	3	25	0.2	2	0.7	5.1125	8.11984	0.029	0.00567237
ENSG00000155438	NIFK	0.88	22	56	27	20	29	9	32	60	23	28	34	78	49	33	47	62	38.0625	18.6386	32.6	0.856486
ENSG00000155975	VPS37A	0.88	18	15	25	16	20	17	20	17	11	29	19	28	36	20	30	24	21.5625	6.57235	2.5	0.115942
ENSG00000156508	EEF1A1	0.88	4098	4766	1254	3299	4573	356	2037	7489	864	5403	4650	8546	7631	588	3135	4810	3968.69	2547.78	4458	1.12329
ENSG00000157379	DHRS1	0.88	7	12	4	11	2	2	9	12	6	7	11	11	12	0.5	9	8	7.71875	3.88145	7.82	1.01312
ENSG00000158019	BABAM2	0.88	24	29	26	18	14	19	37	39	14	36	23	42	45	41	35	29	29.4375	10.1848	30.3	1.0293
ENSG00000159792	PSKH1	0.88	15	25	7	20	9	7	17	23	14	10	16	31	17	6	23	27	16.6875	7.69172	0.29	0.0173783
ENSG00000160201	U2AF1	0.88	2	14	5	4	0.9	0.9	2	1	0.9	6	6	6	4	0.4	2	6	3.81875	3.45702	193	50.5401
ENSG00000160752	FDPS	0.88	35	86	52	37	23	12	39	32	39	47	44	53	32	10	38	42	38.8125	17.5432	327	8.42512
ENSG00000162639	HENMT1	0.88	4	19	18	11	3	0.7	4	38	1	4	14	13	7	1	133	6	17.2937	32.3144	1.79	0.103506
ENSG00000162654	GBP4	0.88	24	30	4	28	11	10	14	102	7	205	47	33	43	10	13	8	36.8125	50.9696	2.49	0.0676401
ENSG00000163510	CWC22	0.88	26	46	27	30	33	10	22	58	9	23	26	66	53	20	48	60	34.8125	17.9303	11.1	0.318851
ENSG00000164039	BDH2	0.88	9	14	24	15	13	9	70	6	23	25	15	31	25	4	21	42	21.625	16.264	39.5	1.82659
ENSG00000164951	PDP1	0.88	13	19	126	25	8	24	21	54	2	13	17	35	23	14	41	53	30.5	29.4912	4.19	0.137377
ENSG00000166046	TCP11L2	0.88	11	11	16	15	4	19	3	24	0.7	10	9	6	7	10	7	25	11.1062	7.08006	0.517	0.0465504
ENSG00000166128	RAB8B	0.88	57	61	37	37	45	12	29	234	7	115	79	88	58	12	53	35	59.9375	54.6473	87.6	1.46152
ENSG00000166169	POLL	0.88	5	10	6	7	7	2	5	10	3	7	7	11	18	9	21	13	8.8125	5.08879	0.475	0.0539007
ENSG00000166402	TUB	0.88	5	6	37	5	6	12	7	0.1	0.3	8	6	22	21	0.7	16	25	11.0687	10.4253	0.702	0.0634218
ENSG00000167207	NOD2	0.88	0.6	2	0.5	0.4	0.2	0.3	0.4	33	0.2	7	6	2	0.7	0.6	1	0.6	3.46875	8.1355	0.014	0.00403604
ENSG00000167261	DPEP2	0.88	2	12	0.4	3	1	0.3	0.6	57	1	6	11	1	3	0.3	3	0.9	6.40625	13.9735	6.07	0.947512
ENSG00000168228	ZCCHC4	0.88	4	13	3	6	3	2	5	7	2	3	5	10	9	4	7	8	5.6875	3.13515	0.112	0.0196923
ENSG00000168411	RFWD3	0.88	8	16	5	7	4	2	10	20	4	8	15	18	11	2	57	14	12.5625	13.135	0.145	0.0115423
ENSG00000169895	SYAP1	0.88	41	31	32	51	25	13	42	30	30	32	28	62	34	18	34	50	34.5625	12.3826	36.1	1.04448
ENSG00000169967	MAP3K2	0.88	25	31	26	32	13	8	21	70	10	27	22	42	26	32	33	36	28.375	14.4678	3.53	0.124405
ENSG00000170260	ZNF212	0.88	6	17	7	8	5	2	8	16	4	4	12	15	14	4	17	16	9.6875	5.43714	0.633	0.0653419
ENSG00000170540	ARL6IP1	0.88	140	111	460	167	127	26	132	183	85	153	140	191	155	18	192	143	151.438	96.8063	34.6	0.228477
ENSG00000171224	FAM241B	0.88	1	4	40	6	3	3	6	3	2	5	5	5	14	2	17	10	7.875	9.63241	1.41	0.179048
ENSG00000171302	CANT1	0.88	22	27	12	17	24	8	20	65	8	30	22	31	31	9	25	22	23.3125	13.6025	3.6	0.154424
ENSG00000171806	METTL18	0.88	7	13	7	11	12	4	14	36	4	4	17	29	17	4	19	19	13.5625	9.259	3.23	0.238157
ENSG00000172009	THOP1	0.88	3	9	11	5	3	3	4	3	6	3	8	9	5	6	13	9	6.25	3.21455	92.7	14.832
ENSG00000173011	TADA2B	0.88	12	24	15	12	9	13	18	45	8	8	19	22	19	25	21	29	18.6875	9.4567	0.639	0.034194
ENSG00000173200	PARP15	0.88	1	30	0.5	2	0.5	0.6	0.7	12	0.5	3	30	2	2	0.5	2	1	5.51875	9.9517	0.227	0.0411325
ENSG00000174130	TLR6	0.88	1	9	1	1	0.2	0.4	1	39	0.6	2	24	2	1	0.3	1	0.6	5.25625	10.8042	0.252	0.0479429
ENSG00000175309	PHYKPL	0.88	7	25	4	13	4	4	10	12	9	10	17	14	14	3	8	15	10.5625	5.83059	1.68	0.159053
ENSG00000175756	AURKAIP1	0.88	39	55	34	45	34	34	49	46	47	34	47	41	54	45	95	57	47.25	14.8436	1.49	0.0315344
ENSG00000175984	DENND2C	0.88	2	4	2	4	1	1	1	1	3	3	2	4	4	10	15	7	4	3.79473	0.416	0.104
ENSG00000176973	FAM89B	0.88	11	24	13	14	24	5	8	45	5	25	35	26	31	21	13	14	19.625	11.2776	1.08	0.0550318
ENSG00000180346	TIGD2	0.88	3	7	3	8	2	1	6	9	15	3	3	8	10	3	8	13	6.375	4.09675	0.425	0.0666667
ENSG00000180543	TSPYL5	0.88	9	22	37	23	12	11	23	4	2	7	8	90	36	7	136	34	28.8125	35.7812	3.05	0.105857
ENSG00000180901	KCTD2	0.88	21	21	46	18	16	12	20	34	5	20	25	74	37	28	56	43	29.75	17.8531	1.43	0.0480672
ENSG00000182150	ERCC6L2	0.88	4	10	6	4	4	3	4	10	2	4	4	12	10	2	9	12	6.25	3.58701	0.159	0.02544
ENSG00000182175	RGMA	0.88	6	6	10	5	11	2	0.7	0.3	0.1	1	5	7	4	21	19	10	6.75625	6.24628	0.403	0.0596485
ENSG00000185379	RAD51D	0.88	3	7	3	4	1	0.7	2	5	0.9	1	5	6	5	0.5	4	6	3.38125	2.16986	0.302	0.0893161
ENSG00000187605	TET3	0.88	4	8	7	4	1	0.9	3	36	1	6	6	8	2	0.5	4	5	6.025	8.37954	0.041	0.00680498
ENSG00000188033	ZNF490	0.88	1	3	2	2	0.5	0.4	0.8	2	0.3	0.7	2	3	1	0.6	2	3	1.51875	0.968999	0.254	0.167243
ENSG00000188419	CHM	0.88	7	9	17	9	5	5	12	16	3	8	8	11	14	5	8	18	9.6875	4.58576	1.48	0.152774
ENSG00000189079	ARID2	0.88	9	10	7	9	6	4	7	23	2	10	11	16	12	4	27	13	10.625	6.70199	2.63	0.247529
ENSG00000196391	ZNF774	0.88	0.4	2	2	2	0.9	0.7	1	0.4	0.3	0.6	1	2	2	2	2	4	1.45625	0.970889	0.344	0.236223
ENSG00000196422	PPP1R26	0.88	6	4	13	8	6	6	10	3	2	10	8	15	12	1	13	12	8.0625	4.2968	0.673	0.0834729
ENSG00000196961	AP2A1	0.88	31	33	35	17	16	8	12	33	12	18	24	46	24	41	54	24	26.75	13.1072	72.4	2.70654
ENSG00000197841	ZNF181	0.88	2	7	8	5	4	7	9	6	4	2	7	19	12	6	7	17	7.625	4.77319	0.112	0.0146885
ENSG00000197956	S100A6	0.88	515	611	101	560	754	171	732	1897	31	2992	910	426	1698	204	439	508	784.312	782.748	259	0.330226
ENSG00000214193	SH3D21	0.88	0.7	2	1	1	0.4	0.2	2	0.6	0.1	2	2	6	2	0.3	5	15	2.51875	3.72061	0.263	0.104417
ENSG00000219607	PPP1R3G	0.88	2	1	1	2	3	3	0.5	0.3	0.2	0.4	1	1	7	0.3	2	0.8	1.59375	1.70547	0.159	0.0997647
ENSG00000239779	WBP1	0.88	8	12	15	11	8	2	7	7	3	9	10	17	15	2	10	19	9.6875	5.08224	0.224	0.0231226
ENSG00000240583	AQP1	0.88	507	930	191	436	443	172	290	1	18	1054	842	135	503	72	165	198	372.312	326.97	13.8	0.0370656
ENSG00000241837	ATP5O	0.88	37	68	59	62	46	109	76	59	39	47	49	78	92	40	59	63	61.4375	19.846	682	11.1007
ENSG00000241839	PLEKHO2	0.88	47	68	13	40	17	5	15	156	10	151	54	50	43	5	28	30	45.75	46.089	21.2	0.463388
ENSG00000251247	ZNF345	0.88	2	7	3	4	1	1	2	4	0.8	2	5	6	4	0.4	6	6	3.3875	2.16329	0.621	0.183321
ENSG00000258311	AC009779.3	0.88	1	4	3	12	0.5	1	1	0.5	1	1	3	3	2	1	2	6	2.625	2.91262	2.8	1.06667
ENSG00000258472	AC005726.2	0.88	3	8	8	5	3	0.9	5	2	4	3	6	5	3	1	5	16	4.86875	3.63808	0.884	0.181566
ENSG00000006530	AGK	0.87	6	18	18	8	4	9	11	14	5	7	13	14	14	3	8	13	10.3125	4.74298	41.2	3.99515
ENSG00000010310	GIPR	0.87	5	2	1	2	1	0.5	0.7	0.3	0.1	5	4	3	1	0.1	0.6	0.9	1.7	1.66893	0.001	0.000588235
ENSG00000010610	CD4	0.87	24	59	12	23	5	6	9	438	33	82	56	15	23	2	20	12	51.1875	105.529	29.5	0.576313
ENSG00000011485	PPP5C	0.87	10	23	18	8	6	10	16	8	9	10	16	19	14	11	14	25	13.5625	5.57337	57.7	4.25438
ENSG00000011523	CEP68	0.87	19	18	20	19	15	8	7	15	1	13	14	29	30	24	20	19	16.9375	7.5848	0.665	0.039262
ENSG00000032389	EIPR1	0.87	2	12	11	5	3	2	7	9	5	3	4	6	5	0.7	7	13	5.91875	3.70571	21.2	3.58184
ENSG00000068784	SRBD1	0.87	8	10	3	8	4	4	7	23	5	8	9	13	14	4	29	22	10.6875	7.72631	5.24	0.490292
ENSG00000074855	ANO8	0.87	4	5	8	4	0.7	2	2	3	1	3	5	5	4	6	2	3	3.60625	1.92197	0.107	0.0296707
ENSG00000076043	REXO2	0.87	26	55	13	37	48	38	40	11	16	42	31	62	71	7	70	37	37.75	20.1511	18.8	0.498013
ENSG00000082068	WDR70	0.87	6	11	7	8	4	3	6	11	3	6	5	15	13	7	10	17	8.25	4.20317	18.2	2.20606
ENSG00000085563	ABCB1	0.87	3	10	15	3	4	2	28	13	19	6	9	11	6	0.4	9	5	8.9625	7.17374	2.86	0.319107
ENSG00000087191	PSMC5	0.87	81	109	112	66	75	27	77	58	47	43	69	101	102	107	118	128	82.5	29.7433	202	2.44848
ENSG00000089356	FXYD3	0.87	1	0.6	2	11	52	0.2	3	0.1	0.1	86	1	3	77	0.1	0.9	0.9	14.9313	28.9931	2.29	0.15337
ENSG00000090382	LYZ	0.87	239	112	10	114	27	21	30	13794	18	2824	189	103	31	7	24	14	1097.31	3455.6	656	0.597824
ENSG00000099622	CIRBP	0.87	137	247	188	125	57	33	49	48	23	63	43	206	158	44	83	247	109.438	78.2074	167	1.52599
ENSG00000100479	POLE2	0.87	0.5	7	2	2	1	0.5	1	1	2	1	2	5	3	0.1	7	2	2.31875	2.16771	1.12	0.483019
ENSG00000102038	SMARCA1	0.87	34	32	56	26	41	23	44	0.4	23	52	29	121	79	17	159	164	56.275	49.5918	7.79	0.138427
ENSG00000102144	PGK1	0.87	114	166	248	157	105	132	235	367	94	193	159	132	157	102	86	223	166.875	73.2483	1970	11.8052
ENSG00000103197	TSC2	0.87	11	14	15	13	7	7	7	14	4	8	13	26	19	25	26	20	14.3125	7.13413	4.11	0.287162
ENSG00000103740	ACSBG1	0.87	0.2	1	20	0.2	0.7	0.2	0.3	0.4	0.1	0.7	1	1	0.5	0.1	0.8	0.2	1.7125	4.88793	0.11	0.0642336
ENSG00000105438	KDELR1	0.87	154	102	38	104	116	40	118	110	94	192	178	214	265	106	118	140	130.562	59.3745	5.54	0.0424318
ENSG00000105559	PLEKHA4	0.87	45	70	5	28	23	7	11	0.8	7	19	24	139	17	12	41	44	30.8	34.266	0.848	0.0275325
ENSG00000106526	ACTR3C	0.87	0.2	2	0.6	0.9	0.8	0.3	4	0.7	9	0.9	0.5	2	1	0.1	1	2	1.625	2.19469	12.9	7.93846
ENSG00000108239	TBC1D12	0.87	9	8	32	11	8	3	8	4	2	7	11	15	14	5	18	15	10.625	7.32917	0.083	0.00781176
ENSG00000108469	RECQL5	0.87	2	7	4	4	2	0.9	6	5	1	2	5	7	5	0.9	7	9	4.2375	2.56018	1.26	0.297345
ENSG00000108587	GOSR1	0.87	10	21	16	15	10	7	15	18	9	8	14	32	20	5	18	24	15.125	7.06989	40.9	2.70413
ENSG00000108799	EZH1	0.87	26	27	34	30	19	11	17	24	3	21	51	40	59	25	21	36	27.75	14.0973	0.803	0.0289369
ENSG00000111424	VDR	0.87	9	4	0.5	5	6	0.3	16	17	0.4	8	6	3	3	4	3	6	5.7	4.91705	0.116	0.0203509
ENSG00000111679	PTPN6	0.87	7	146	5	8	2	2	10	253	5	24	51	9	9	0.6	6	12	34.35	68.4284	222	6.46288
ENSG00000111834	RSPH4A	0.87	0.1	5	3	1	0.2	0.1	1	0.1	0.1	19	0.8	27	0.5	0.3	9	2	4.325	7.80073	0.191	0.0441618
ENSG00000112081	SRSF3	0.87	89	164	79	96	54	35	83	130	37	91	143	247	214	29	128	178	112.312	64.3902	605	5.38676
ENSG00000113387	SUB1	0.87	30	65	84	81	43	24	39	61	18	64	53	54	46	15	64	58	49.9375	20.7444	838	16.781
ENSG00000117000	RLF	0.87	13	26	30	14	18	11	10	27	4	16	21	29	33	13	33	27	20.3125	9.10471	0.871	0.04288
ENSG00000118620	ZNF430	0.87	2	11	6	4	2	1	3	16	0.5	4	9	8	7	0.4	5	11	5.61875	4.45933	0.081	0.014416
ENSG00000118680	MYL12B	0.87	352	633	221	323	262	133	538	594	236	939	399	448	424	135	449	599	417.812	211.191	572	1.36904
ENSG00000118894	EEF2KMT	0.87	5	8	4	4	3	1	3	3	3	2	3	15	5	6	9	7	5.0625	3.43451	0.467	0.0922469
ENSG00000120318	ARAP3	0.87	16	15	5	10	6	6	6	15	1	28	15	9	10	0.8	5	7	9.675	6.86513	0.318	0.0328682
ENSG00000122068	FYTTD1	0.87	45	48	35	49	48	29	33	54	14	64	48	78	60	67	84	93	53.0625	20.8629	5.22	0.0983746
ENSG00000123575	FAM199X	0.87	38	27	92	39	17	11	50	43	9	23	29	49	34	14	45	54	35.875	20.7682	0.749	0.020878
ENSG00000124733	MEA1	0.87	77	101	102	78	71	23	71	96	44	86	82	131	167	36	320	100	99.0625	68.4266	6.41	0.0647066
ENSG00000126522	ASL	0.87	9	12	5	8	5	1	24	8	64	8	5	9	8	1	4	14	11.5625	15.0198	48.3	4.1773
ENSG00000127528	KLF2	0.87	43	120	5	87	26	31	19	738	16	183	192	47	143	53	45	25	110.812	177.528	1.46	0.0131754
ENSG00000128228	SDF2L1	0.87	18	60	6	14	31	5	66	26	113	47	74	27	25	7	39	50	38	29.3803	54.9	1.44474
ENSG00000132670	PTPRA	0.87	53	58	125	46	38	11	38	81	11	52	44	86	73	7	61	84	54.25	31.3124	2.6	0.0479263
ENSG00000133627	ACTR3B	0.87	1	3	12	2	1	1	3	4	2	3	2	4	3	2	9	3	3.4375	2.96578	11.1	3.22909
ENSG00000134247	PTGFRN	0.87	18	44	10	26	75	30	11	2	10	17	30	121	73	2	53	22	34	32.3996	5.85	0.172059
ENSG00000135315	CEP162	0.87	3	8	3	5	4	2	6	8	1	3	4	14	10	1	25	11	6.75	6.14817	0.456	0.0675556
ENSG00000136205	TNS3	0.87	26	28	20	46	9	10	47	16	25	26	31	47	22	8	14	38	25.8125	13.2173	8.41	0.325811
ENSG00000136295	TTYH3	0.87	16	29	16	12	4	4	17	63	12	16	28	21	12	0.8	13	13	17.3	14.3898	2.67	0.154335
ENSG00000138036	DYNC2LI1	0.87	6	9	16	14	6	2	17	1	2	13	6	27	13	2	32	21	11.6875	9.2716	0.971	0.0830802
ENSG00000140990	NDUFB10	0.87	87	127	143	127	100	217	154	112	98	82	110	97	218	287	124	136	138.688	56.261	127	0.915728
ENSG00000141295	SCRN2	0.87	37	20	9	65	6	4	18	7	5	12	10	20	17	6	12	35	17.6875	16.0363	8.41	0.475477
ENSG00000141527	CARD14	0.87	0.2	1	0.4	0.6	0.4	0.1	0.3	0.4	0.1	0.7	1	0.9	0.8	0.1	0.5	0.2	0.48125	0.318787	0.404	0.839481
ENSG00000143578	CREB3L4	0.87	5	6	3	10	3	2	6	6	4	7	6	13	29	3	8	14	7.8125	6.62539	0.621	0.079488
ENSG00000143774	GUK1	0.87	38	73	50	47	30	11	27	26	19	66	56	48	46	8	39	45	39.3125	18.3729	52.1	1.32528
ENSG00000151461	UPF2	0.87	28	34	29	23	38	15	20	40	10	19	31	44	55	33	61	53	33.3125	14.6639	14.5	0.435272
ENSG00000151914	DST	0.87	19	14	51	31	21	33	8	1	4	35	12	26	29	20	18	19	21.3125	12.7369	5.94	0.27871
ENSG00000154310	TNIK	0.87	1	5	30	2	7	6	6	26	4	8	5	2	9	8	16	34	10.5625	10.3535	5.12	0.484734
ENSG00000154917	RAB6B	0.87	4	5	191	11	10	14	6	4	0.6	4	6	9	9	1	8	7	18.1	46.244	85	4.69613
ENSG00000156983	BRPF1	0.87	7	16	6	6	5	3	7	22	3	7	13	15	14	9	22	17	10.75	6.30872	1.04	0.0967442
ENSG00000158042	MRPL17	0.87	15	35	16	19	18	14	27	22	15	56	33	35	35	16	30	27	25.8125	11.3268	12.9	0.499758
ENSG00000159958	TNFRSF13C	0.87	0.2	143	0.9	0.7	0.4	0.3	0.4	28	0.2	4	71	0.8	0.4	0.1	0.7	0.5	15.725	38.5892	0.762	0.0484579
ENSG00000163378	EOGT	0.87	29	19	9	30	8	13	7	10	3	38	14	17	33	8	20	14	17	10.4179	1.79	0.105294
ENSG00000163833	FBXO40	0.87	0.3	1	1	6	0.1	113	0.1	0.3	0.2	0.1	0.3	0.6	0.1	74	2	40	14.9437	32.9794	0.363	0.0242911
ENSG00000164167	LSM6	0.87	28	27	12	23	18	4	9	43	6	22	18	33	23	8	42	21	21.0625	11.801	28.1	1.33412
ENSG00000164190	NIPBL	0.87	20	20	14	16	17	10	16	58	6	22	23	34	27	14	36	40	23.3125	13.1439	7.24	0.310563
ENSG00000164344	KLKB1	0.87	0.2	2	0.8	0.8	0.4	0.7	6	0.1	77	0.5	4	2	2	0.1	0.6	2	6.2	18.9465	298	48.0645
ENSG00000164691	TAGAP	0.87	2	27	2	4	0.8	0.4	1	366	0.7	11	37	3	3	0.1	5	1	29	90.4763	0.632	0.0217931
ENSG00000167549	CORO6	0.87	2	2	5	5	2	11	0.3	0.1	0.2	2	4	1	9	174	6	44	16.725	43.2493	9.25	0.553064
ENSG00000168309	FAM107A	0.87	46	40	742	25	43	45	38	0.1	3	75	37	11	38	18	17	60	77.3812	178.363	0.977	0.0126258
ENSG00000168890	TMEM150A	0.87	10	10	3	7	8	3	16	9	10	12	15	20	21	15	13	17	11.8125	5.34439	0.003	0.000253968
ENSG00000168917	SLC35G2	0.87	12	9	12	14	5	2	2	0.3	0.9	9	10	5	9	1	11	7	6.825	4.55785	0.388	0.0568498
ENSG00000170291	ELP5	0.87	9	23	18	18	14	13	22	23	15	16	25	26	25	13	79	28	22.9375	15.9561	3.08	0.134278
ENSG00000170340	B3GNT2	0.87	21	55	17	40	14	16	59	64	16	88	33	27	17	4	24	28	32.6875	22.7617	2.08	0.0636329
ENSG00000170412	GPRC5C	0.87	3	3	2	4	4	2	25	0.2	21	5	4	12	10	15	4	27	8.825	8.6908	3.52	0.398867
ENSG00000171155	C1GALT1C1	0.87	34	52	24	47	37	19	52	54	25	32	55	50	40	4	40	43	38	14.4453	0.358	0.00942105
ENSG00000171159	C9orf16	0.87	34	39	58	33	19	9	20	51	9	31	31	30	51	14	46	18	30.8125	15.3241	1.9	0.0616633
ENSG00000171928	TVP23B	0.87	7	13	7	8	7	4	18	13	8	12	12	19	17	3	21	21	11.875	5.9203	1.45	0.122105
ENSG00000172171	TEFM	0.87	2	10	3	5	3	4	7	5	3	2	9	12	6	2	8	10	5.6875	3.28062	0.638	0.112176
ENSG00000172661	WASHC2C	0.87	12	20	9	9	9	5	13	23	4	11	25	18	19	8	16	22	13.9375	6.59766	6.78	0.486457
ENSG00000172780	RAB43	0.87	1	2	0.5	0.8	0.2	0.1	0.6	3	2	2	1	1	0.4	0.1	1	1	1.04375	0.818102	53.2	50.9701
ENSG00000172986	GXYLT2	0.87	2	5	8	8	6	8	1	0.1	0.1	9	5	51	14	0.6	11	17	9.1125	12.2278	0.295	0.0323731
ENSG00000173040	EVC2	0.87	4	4	0.2	3	4	0.7	3	0.8	0.2	2	6	12	8	0.5	7	7	3.9	3.36749	0.038	0.00974359
ENSG00000173597	SULT1B1	0.87	3	4	4	2	8	2	2	48	37	2	3	3	2	0.7	2	2	7.79375	13.7904	1.99	0.255333
ENSG00000173599	PC	0.87	40	3	29	55	3	1	14	2	77	1	8	6	5	3	13	12	17	22.2681	35.9	2.11176
ENSG00000174013	FBXO45	0.87	9	11	33	9	12	4	7	18	4	6	11	18	13	9	23	14	12.5625	7.5363	0.333	0.0265075
ENSG00000177150	FAM210A	0.87	7	14	11	10	8	24	15	15	9	6	13	17	17	10	20	24	13.75	5.60357	14.2	1.03273
ENSG00000177238	TRIM72	0.87	0.6	3	1	4	0.6	0.7	0.5	0.4	0.2	0.7	1	1	0.7	82	3	46	9.0875	22.4474	1.73	0.190371
ENSG00000177576	C18orf32	0.87	3	7	14	6	4	2	8	8	2	5	10	9	7	1	6	8	6.25	3.39608	1.75	0.28
ENSG00000179262	RAD23A	0.87	101	101	66	76	80	54	38	56	29	99	67	84	117	802	100	165	127.188	182.922	128	1.00639
ENSG00000181191	PJA1	0.87	34	19	53	45	22	6	21	24	3	23	35	80	39	7	49	40	31.25	19.995	1.29	0.04128
ENSG00000181240	SLC25A41	0.87	0.4	1	1	0.2	1	0.2	0.3	0.1	0.1	0.2	0.6	2	2	0.1	2	2	0.825	0.768982	0.005	0.00606061
ENSG00000181788	SIAH2	0.87	33	28	23	26	46	12	21	70	25	49	66	82	98	19	62	19	42.4375	25.9999	0.259	0.00610309
ENSG00000181873	IBA57	0.87	2	6	3	4	2	3	3	4	3	1	4	6	3	2	5	6	3.5625	1.54785	9.79	2.74807
ENSG00000181894	ZNF329	0.87	8	13	17	8	5	4	9	9	2	7	11	25	16	1	23	12	10.625	6.8884	0.061	0.00574118
ENSG00000182858	ALG12	0.87	2	6	2	4	3	2	6	4	4	3	7	7	6	3	4	7	4.375	1.85742	0.336	0.0768
ENSG00000182944	EWSR1	0.87	41	109	55	39	17	19	31	51	19	34	48	61	49	25	62	78	46.125	24.1878	145	3.14363
ENSG00000183340	JRKL	0.87	8	11	9	14	10	3	12	14	2	8	16	40	16	4	18	18	12.6875	8.86731	0.49	0.0386207
ENSG00000184619	KRBA2	0.87	5	1	1	2	0.9	2	0.9	0.6	0.2	0.3	0.9	2	2	0.6	2	2	1.4625	1.15636	0.779	0.53265
ENSG00000185973	TMLHE	0.87	10	7	15	12	10	16	10	15	8	7	8	19	18	20	7	14	12.25	4.50925	3.16	0.257959
ENSG00000186665	C17orf58	0.87	18	20	18	28	13	4	11	10	13	13	9	18	30	4	16	19	15.25	7.27095	0.139	0.00911475
ENSG00000188372	ZP3	0.87	2	5	2	11	1	0.1	0.6	2	0.3	0.2	0.7	4	1	0.7	1	1	2.0375	2.74539	0.1	0.0490798
ENSG00000196116	TDRD7	0.87	9	15	16	9	15	5	10	31	4	20	21	21	27	7	92	15	19.8125	20.7178	6.1	0.307886
ENSG00000197343	ZNF655	0.87	10	35	17	20	11	9	23	35	8	18	32	37	32	8	20	29	21.5	10.5956	0.396	0.0184186
ENSG00000197857	ZNF44	0.87	5	11	6	9	4	2	16	8	2	5	8	23	14	0.7	11	12	8.54375	5.87968	0.141	0.0165033
ENSG00000198026	ZNF335	0.87	4	15	6	3	3	2	4	9	2	6	13	8	9	7	8	11	6.875	3.89658	1	0.145455
ENSG00000198046	ZNF667	0.87	0.8	2	11	2	2	1	2	0.8	0.2	1	3	6	6	0.2	5	8	3.1875	3.13898	0.205	0.0643137
ENSG00000198089	SFI1	0.87	1	9	3	2	1	0.4	2	4	0.4	4	14	5	4	0.1	5	4	3.68125	3.5917	0.066	0.0179287
ENSG00000198522	GPN1	0.87	24	39	25	24	19	9	22	34	9	16	22	46	29	12	35	49	25.875	12.1539	7.03	0.271691
ENSG00000198851	CD3E	0.87	1	98	0.4	5	3	0.4	1	416	2	34	166	6	7	0.6	3	4	46.7125	108.508	20.1	0.430292
ENSG00000198860	TSEN15	0.87	18	41	40	31	23	15	24	48	15	23	30	69	37	17	44	43	32.375	14.8048	4.81	0.148571
ENSG00000204632	HLA-G	0.87	28	8	1	7	0.6	2	3	49	5	55	0.7	17	32	3	4	14	14.3313	17.5322	23	1.60488
ENSG00000205978	NYNRIN	0.87	10	8	1	12	5	3	8	0.2	2	8	9	91	18	1	16	13	12.825	21.5335	0.034	0.00265107
ENSG00000206077	ZDHHC11B	0.87	0.9	1	24	5	3	0.8	2	0.5	0.9	4	2	4	5	0.6	4	3	3.79375	5.61895	0.084	0.0221417
ENSG00000227057	WDR46	0.87	32	46	13	21	13	5	17	28	13	21	25	53	32	24	35	46	26.5	13.5794	9.12	0.344151
ENSG00000241404	EGFL8	0.87	2	5	1	4	2	0.5	2	0.7	0.4	3	2	14	3	0.1	1	2	2.66875	3.3061	0.18	0.0674473
ENSG00000254087	LYN	0.87	25	96	12	13	5	5	10	396	10	81	44	14	19	2	11	20	47.6875	96.7517	46.1	0.96671
ENSG00000000457	SCYL3	0.86	4	9	7	8	4	2	6	12	4	3	8	15	12	2	8	12	7.25	3.99166	4.68	0.645517
ENSG00000004700	RECQL	0.86	37	36	13	25	23	15	14	49	4	22	30	29	23	9	20	34	23.9375	11.6874	145	6.05744
ENSG00000004939	SLC4A1	0.86	7	0.5	0.3	0.8	7	0.1	51	0.1	0.2	36	0.4	0.4	0.4	0.1	3	0.2	6.71875	14.7948	78.2	11.6391
ENSG00000005436	GCFC2	0.86	12	19	14	18	5	8	9	11	9	9	5	28	12	14	18	26	13.5625	6.75247	8.67	0.639263
ENSG00000005486	RHBDD2	0.86	48	72	132	44	21	9	60	41	50	93	40	85	63	31	82	107	61.125	32.6065	1.94	0.0317382
ENSG00000010803	SCMH1	0.86	22	33	10	25	30	18	22	7	5	31	26	56	68	24	40	36	28.3125	16.58	0.202	0.00713466
ENSG00000011465	DCN	0.86	205	97	21	227	430	151	92	0.3	28	755	409	984	622	47	394	219	292.581	288.507	155	0.529767
ENSG00000013293	SLC7A14	0.86	0.3	1	30	0.5	2	0.1	0.5	0.1	0.2	0.1	1	0.8	1	0.1	1	0.4	2.44375	7.36623	0.28	0.114578
ENSG00000058668	ATP2B4	0.86	95	98	72	259	183	46	25	130	21	137	72	224	240	8	88	36	108.375	80.5712	24.2	0.223299
ENSG00000063854	HAGH	0.86	9	11	18	12	7	14	16	8	25	14	14	6	14	18	20	14	13.75	5.0266	19.1	1.38909
ENSG00000069998	HDHD5	0.86	9	13	5	7	8	9	11	17	10	6	14	14	14	6	12	12	10.4375	3.50179	40.7	3.8994
ENSG00000074755	ZZEF1	0.86	11	17	10	9	5	7	7	28	5	8	12	13	11	27	8	20	12.375	7.13559	6.66	0.538182
ENSG00000076770	MBNL3	0.86	8	12	3	12	2	10	11	41	53	10	9	9	26	1	62	9	17.375	18.4567	6.28	0.361439
ENSG00000079156	OSBPL6	0.86	0.7	3	10	2	2	1	1	0.3	2	7	2	3	2	18	3	6	3.9375	4.54985	0.844	0.214349
ENSG00000079805	DNM2	0.86	20	29	21	14	12	12	26	35	7	28	23	20	25	28	24	24	21.75	7.3982	87	4
ENSG00000080845	DLGAP4	0.86	25	19	21	27	18	7	10	15	5	45	19	35	33	50	25	33	24.1875	12.7343	6.16	0.254677
ENSG00000082269	FAM135A	0.86	5	6	11	5	4	3	10	5	2	10	5	14	9	3	15	6	7.0625	3.95759	0.289	0.0409204
ENSG00000083520	DIS3	0.86	12	23	15	15	7	6	13	20	7	15	12	22	20	5	24	28	15.25	7.03799	39.8	2.60984
ENSG00000085415	SEH1L	0.86	14	30	25	18	9	3	12	13	8	10	10	27	14	10	18	22	15.1875	7.54735	24.6	1.61975
ENSG00000086589	RBM22	0.86	31	43	33	31	25	14	28	81	11	51	45	72	50	37	41	44	39.8125	18.4073	24.5	0.615385
ENSG00000087086	FTL	0.86	6431	4523	1241	6483	1892	590	4899	7104	6078	11382	6299	3712	5909	1146	1410	4180	4579.94	2872.92	157	0.0342799
ENSG00000087470	DNM1L	0.86	23	48	84	33	23	24	35	28	11	23	25	59	51	14	62	51	37.125	20.0628	171	4.60606
ENSG00000089847	ANKRD24	0.86	0.5	0.4	12	0.9	0.4	0.1	0.9	0.3	1	0.5	0.5	0.5	2	0.2	5	2	1.7	2.99822	0.017	0.01
ENSG00000090889	KIF4A	0.86	0.6	0.7	0.7	0.4	0.7	0.2	0.3	0.4	0.1	0.2	1	2	0.2	0.1	4	0.5	0.75625	0.982493	5.64	7.45785
ENSG00000099326	MZF1	0.86	2	9	4	5	2	1	6	2	1	5	8	13	10	2	5	11	5.375	3.81007	0.366	0.068093
ENSG00000100505	TRIM9	0.86	0.4	0.3	45	0.4	3	0.1	0.7	0.1	0.9	0.3	0.9	0.5	1	0.1	2	1	3.54375	11.0814	0.569	0.160564
ENSG00000100726	TELO2	0.86	7	15	5	7	4	2	6	8	3	6	11	10	11	4	7	10	7.25	3.45447	6.9	0.951724
ENSG00000101040	ZMYND8	0.86	17	29	26	19	15	9	19	21	4	10	16	22	30	8	27	25	18.5625	7.8991	10.7	0.576431
ENSG00000101162	TUBB1	0.86	0.5	2	0.2	0.6	0.2	0.3	0.5	198	0.1	20	3	0.6	0.5	0.1	1	0.1	14.2312	49.2471	597	41.9499
ENSG00000101811	CSTF2	0.86	5	15	8	9	6	3	10	17	5	6	12	16	15	1	25	13	10.375	6.25966	39.7	3.82651
ENSG00000102401	ARMCX3	0.86	52	40	105	64	72	36	78	37	18	73	64	101	97	18	76	137	66.75	32.9616	6.39	0.0957303
ENSG00000103199	ZNF500	0.86	3	8	4	3	1	1	3	4	1	2	3	8	6	2	3	6	3.625	2.27669	0.045	0.0124138
ENSG00000105270	CLIP3	0.86	35	29	365	23	88	4	12	0.8	1	20	35	132	200	6	56	7	63.3625	97.2141	0.347	0.00547643
ENSG00000105339	DENND3	0.86	14	20	8	3	4	3	6	15	0.9	19	14	3	6	1	3	6	7.86875	6.3934	7.2	0.915012
ENSG00000105369	CD79A	0.86	2	521	0.3	6	1	0.1	0.5	226	0.3	23	361	3	3	0.6	0.3	0.9	71.8125	157.25	2.1	0.0292428
ENSG00000106459	NRF1	0.86	10	24	9	13	8	3	8	30	3	14	19	35	21	10	13	21	15.0625	9.21932	11.7	0.776763
ENSG00000106733	NMRK1	0.86	14	24	14	24	7	3	15	20	8	19	35	22	30	7	13	29	17.75	9.234	1.91	0.107606
ENSG00000107130	NCS1	0.86	6	30	235	7	72	2	28	0.3	2	16	17	40	110	3	24	38	39.3937	59.7942	4.84	0.122862
ENSG00000107566	ERLIN1	0.86	26	18	7	26	19	6	24	23	51	19	21	48	34	5	36	33	24.75	13.4139	25.3	1.02222
ENSG00000108771	DHX58	0.86	5	14	6	6	2	1	5	12	6	8	11	9	8	1	10	8	7	3.77712	0.777	0.111
ENSG00000113621	TXNDC15	0.86	30	48	38	34	32	15	37	30	16	29	49	68	55	14	55	62	38.25	16.5831	3.66	0.0956863
ENSG00000113790	EHHADH	0.86	9	5	8	34	7	7	59	5	119	2	3	8	9	1	6	13	18.4375	30.5679	9	0.488136
ENSG00000115970	THADA	0.86	6	11	3	8	6	3	6	12	4	7	9	16	11	6	12	16	8.5	4.14729	2.43	0.285882
ENSG00000116005	PCYOX1	0.86	60	51	65	242	62	51	65	34	51	61	69	92	124	43	95	124	80.5625	50.4275	62.9	0.78076
ENSG00000116521	SCAMP3	0.86	38	47	38	34	21	18	42	51	24	31	58	45	47	40	28	48	38.125	11.401	70	1.83607
ENSG00000117475	BLZF1	0.86	12	17	13	27	30	12	27	23	7	17	15	28	46	12	56	26	23	13.1352	0.322	0.014
ENSG00000117691	NENF	0.86	57	74	90	67	62	55	55	35	35	132	75	116	145	65	31	75	73.0625	33.2555	63.6	0.870488
ENSG00000118246	FASTKD2	0.86	10	22	13	17	8	14	14	14	11	11	9	32	15	13	17	30	15.625	6.91737	10.9	0.6976
ENSG00000119326	CTNNAL1	0.86	35	37	20	58	35	36	63	3	16	195	42	288	49	45	89	396	87.9375	109.934	1.4	0.0159204
ENSG00000119509	INVS	0.86	7	7	4	6	4	2	5	6	4	4	7	13	9	2	9	7	6	2.82843	3.09	0.515
ENSG00000119599	DCAF4	0.86	3	12	5	5	2	0.9	5	3	2	3	3	10	6	4	9	16	5.55625	4.15419	0.149	0.0268166
ENSG00000120686	UFM1	0.86	64	85	77	78	41	18	71	60	40	84	73	94	73	17	61	96	64.5	24.2102	99.9	1.54884
ENSG00000120899	PTK2B	0.86	6	56	81	8	4	2	10	97	5	16	75	5	13	2	9	10	24.9375	32.312	56.6	2.26967
[truncated: 9,123 more rows]

## Sheet: M. musculus
gene_ID	gene_name	DBF_score	TPM_brain	TPM_heart	TPM_kidney	TPM_liver	TPM_skeletalmuscle	TPM_mean	TPM_sd	ppm_value	ppm_TPM_ratio		Avg. values for specific fractions
ENSMUSG00000000826	Dnajc5	1	145	29	23	22	16	47	54.9773	110	2.34043			avg. DBF score	avg. TPM	avg. ppm	avg. ppm/TPM
ENSMUSG00000001120	Pcbp3	1	81	2	27	1	1	22.4	34.5948	28	1.25		total	0.555445	60.2005	71.9958	3.0607
ENSMUSG00000001288	Rarg	1	11	17	16	4	8	11.2	5.44977	0.052	0.00464286		DBFscore intermediate	0.541049	57.1146	71.1713	3.11434
ENSMUSG00000001569	Nom1	1	7	5	5	5	4	5.2	1.09545	24.7	4.75		DBFscore>0.95	0.981195	52.0575	76.1255	1.7277
ENSMUSG00000002020	Ltbp2	1	2	4	0.3	0.2	0.8	1.46	1.58997	1.59	1.08904		DBFscore<0.05	0.0190435	147.703	82.5327	4.54322
ENSMUSG00000002129	Sf3a1	1	52	28	16	16	7	23.8	17.4413	131	5.5042
ENSMUSG00000002831	Plin4	1	4	122	10	2	168	61.2	78.2637	2.53	0.0413399
ENSMUSG00000002835	Chaf1a	1	4	2	3	0.9	1	2.18	1.3274	0.483	0.22156		Standard deviation
ENSMUSG00000003344	Btbd2	1	162	40	62	24	25	62.6	57.6524	0.199	0.00317891			avg. DBF score	avg. TPM	avg. ppm	avg. ppm/TPM
ENSMUSG00000003458	Ncstn	1	64	54	59	35	16	45.6	19.857	2.54	0.0557018		total	0.292871	408.942	677.161	29.0736
ENSMUSG00000004394	Tmed4	1	100	84	140	55	32	82.2	41.5957	44.6	0.542579		DBFscore intermediate	0.261319	303.175	704.92	29.8881
ENSMUSG00000004568	Arhgef18	1	31	9	22	10	3	15	11.2916	4.98	0.332		DBFscore>0.95	0.0139316	181.861	427.713	6.2838
ENSMUSG00000005442	Cic	1	105	28	25	12	11	36.2	39.2008	3.9	0.107735		DBFscore<0.05	0.0145348	1469.84	363.524	36.8751
ENSMUSG00000005506	Celf1	1	89	46	22	30	19	41.2	28.7002	36.3	0.881068
ENSMUSG00000005882	Uqcc1	1	17	42	22	10	28	23.8	12.1326	5.5	0.231092
ENSMUSG00000005893	Nr2c2	1	14	5	1	2	3	5	5.24404	0.308	0.0616
ENSMUSG00000006362	Cbfa2t3	1	39	19	3	1	12	14.8	15.3362	0.058	0.00391892
ENSMUSG00000006386	Tek	1	10	29	13	3	6	12.2	10.1341	0.487	0.039918
ENSMUSG00000007656	Arpp19	1	76	19	26	14	13	29.6	26.4443	513	17.3311
ENSMUSG00000008348	Ubc	1	163	143	257	196	118	175.4	53.808	150	0.855188
ENSMUSG00000009030	Pdcl	1	12	9	9	10	3	8.6	3.36155	1.41	0.163953
ENSMUSG00000009079	Ewsr1	1	100	43	85	29	23	56	34.5109	176	3.14286
ENSMUSG00000013629	Cad	1	17	11	7	10	4	9.8	4.86826	13.6	1.38776
ENSMUSG00000013921	Clip3	1	764	9	3	0.4	2	155.68	340.077	0.093	0.000597379
ENSMUSG00000016624	Phf21b	1	13	1	1	0.3	0.6	3.18	5.49745	0.064	0.0201258
ENSMUSG00000018411	Mapt	1	244	33	47	0.7	21	69.14	99.2142	112	1.6199
ENSMUSG00000018501	Ncor1	1	47	31	17	16	18	25.8	13.3304	4.04	0.156589
ENSMUSG00000018661	Cog1	1	50	17	19	11	9	21.2	16.6193	12.6	0.59434
ENSMUSG00000018697	Aatf	1	11	7	18	9	6	10.2	4.76445	52.7	5.16667
ENSMUSG00000018909	Arrb1	1	119	13	23	3	7	33	48.6621	12.4	0.375758
ENSMUSG00000019179	Mdh2	1	349	926	243	160	262	388	308.16	1179	3.03866
ENSMUSG00000019278	Dpep1	1	0.3	47	185	0.5	19	50.36	77.6445	8.05	0.159849
ENSMUSG00000019368	Sec14l4	1	0.7	0.5	1	139	0.3	28.3	61.8837	3.31	0.116961
ENSMUSG00000019763	Rmnd1	1	15	19	21	12	9	15.2	4.91935	2.43	0.159868
ENSMUSG00000020100	Slc29a3	1	12	4	35	2	2	11	14.0357	1.42	0.129091
ENSMUSG00000020128	Vps54	1	10	9	7	9	5	8	2	9.85	1.23125
ENSMUSG00000020220	Vps13d	1	15	19	7	8	8	11.4	5.31977	0.131	0.0114912
ENSMUSG00000020628	Trappc12	1	48	18	21	14	5	21.2	16.1462	14.5	0.683962
ENSMUSG00000020716	Nf1	1	29	10	4	4	3	10	10.9772	1.27	0.127
ENSMUSG00000020807	4933427D14Rik	1	18	2	3	1	0.9	4.98	7.32816	0.012	0.00240964
ENSMUSG00000021901	Bap1	1	110	27	39	19	27	44.4	37.3604	0.281	0.00632883
ENSMUSG00000022020	Naa16	1	2	2	1	3	3	2.2	0.83666	9.75	4.43182
ENSMUSG00000022075	Rhobtb2	1	107	20	12	7	16	32.4	41.9798	0.455	0.0140432
ENSMUSG00000022119	Rbm26	1	14	8	3	4	2	6.2	4.91935	24.6	3.96774
ENSMUSG00000022263	Trio	1	78	17	12	5	8	24	30.5205	0.822	0.03425
ENSMUSG00000022672	Prkdc	1	5	3	2	1	1	2.4	1.67332	3.4	1.41667
ENSMUSG00000022769	Sdf2l1	1	27	18	25	102	5	35.4	38.2139	83.6	2.36158
ENSMUSG00000022811	Zfp148	1	17	9	4	6	3	7.8	5.63028	1.52	0.194872
ENSMUSG00000022881	Rfc4	1	2	3	3	2	4	2.8	0.83666	88.8	31.7143
ENSMUSG00000022999	Lmbr1l	1	10	6	23	6	5	10	7.51665	0.155	0.0155
ENSMUSG00000023066	Rttn	1	2	2	0.5	0.3	0.5	1.06	0.861974	0.065	0.0613208
ENSMUSG00000023118	Sympk	1	111	58	45	42	43	59.8	29.3377	50	0.83612
ENSMUSG00000023224	Serping1	1	15	135	73	910	40	234.6	380.228	123	0.524297
ENSMUSG00000023707	Ogfod2	1	35	9	43	18	9	22.8	15.4984	0.932	0.0408772
ENSMUSG00000023913	Pla2g7	1	118	3	12	2	17	30.4	49.369	9.35	0.307566
ENSMUSG00000024201	Kdm4b	1	70	26	16	10	17	27.8	24.2734	0.083	0.00298561
ENSMUSG00000024236	Svil	1	6	95	7	7	62	35.4	41.0402	3.1	0.0875706
ENSMUSG00000024379	Tslp	1	0.1	0.8	0.2	0.5	0.3	0.38	0.277489	0.371	0.976316
ENSMUSG00000024382	Ercc3	1	28	16	23	15	8	18	7.71362	11.4	0.633333
ENSMUSG00000024451	Arap3	1	9	43	19	7	9	17.4	15.0599	0.069	0.00396552
ENSMUSG00000024604	Rbm22	1	24	12	9	7	5	11.4	7.50333	4.79	0.420175
ENSMUSG00000024910	Ctsw	1	0.1	0.6	1	0.7	0.9	0.66	0.350714	0	0
ENSMUSG00000025190	Got1	1	528	995	94	345	198	432	354.526	353	0.81713
ENSMUSG00000025265	Fgd1	1	20	12	5	0.8	1	7.76	8.20902	7.36	0.948454
ENSMUSG00000025650	Col7a1	1	1	0.4	2	0.1	5	1.7	1.98242	0.147	0.0864706
ENSMUSG00000025920	Stau2	1	45	15	4	1	9	14.8	17.6975	2.01	0.135811
ENSMUSG00000026189	Pecr	1	5	10	478	223	19	147	206.551	111	0.755102
ENSMUSG00000026245	Farsb	1	43	34	30	28	29	32.8	6.14003	94.2	2.87195
ENSMUSG00000026319	Relch	1	14	5	3	3	0.9	5.18	5.13926	20.7	3.99614
ENSMUSG00000026470	Stx6	1	30	5	10	3	2	10	11.5974	3.88	0.388
ENSMUSG00000026571	Dcaf6	1	35	35	8	10	66	30.8	23.5945	0.876	0.0284416
ENSMUSG00000026640	Plxna2	1	19	10	2	4	2	7.4	7.26636	0.315	0.0425676
ENSMUSG00000026784	Pdss1	1	4	6	4	1	1	3.2	2.16795	0.762	0.238125
ENSMUSG00000026896	Ifih1	1	1	3	1	9	0.8	2.96	3.49399	1.22	0.412162
ENSMUSG00000026914	Psmd14	1	35	21	16	30	19	24.2	7.98123	324	13.3884
ENSMUSG00000026923	Notch1	1	10	13	3	4	2	6.4	4.82701	13	2.03125
ENSMUSG00000027048	Abcb11	1	0.2	0.7	2	282	0.4	57.06	125.747	5.63	0.0986681
ENSMUSG00000027244	Atg13	1	114	45	40	55	25	55.8	34.2885	45.4	0.81362
ENSMUSG00000027566	Psma7	1	37	20	55	28	38	35.6	13.0882	556	15.618
ENSMUSG00000027601	Mtfr1	1	4	17	32	22	8	16.6	11.1714	0.147	0.00885542
ENSMUSG00000028068	Iqgap3	1	0.2	0.5	0.5	0.3	0.5	0.4	0.141421	1.03	2.575
ENSMUSG00000028134	Ptbp2	1	18	4	1	1	2	5.2	7.25948	61.3	11.7885
ENSMUSG00000028159	Dapp1	1	2	4	1	0.4	2	1.88	1.36821	0.64	0.340426
ENSMUSG00000028268	Gbp3	1	1	8	20	4	2	7	7.74597	0.751	0.107286
ENSMUSG00000028289	Epha7	1	14	2	0.7	0.4	0.2	3.46	5.93363	0.496	0.143353
ENSMUSG00000028465	Tln1	1	26	62	72	25	28	42.6	22.5788	122	2.86385
ENSMUSG00000028657	Ppt1	1	68	31	46	15	4	32.8	25.3121	77.7	2.3689
ENSMUSG00000028757	Ddost	1	177	95	185	171	33	132.2	66.1906	46.7	0.353253
ENSMUSG00000028943	Espn	1	4	3	21	0.5	0.5	5.8	8.63568	4.76	0.82069
ENSMUSG00000028992	Nmnat1	1	5	13	12	9	12	10.2	3.27109	0.344	0.0337255
ENSMUSG00000029029	Wrap73	1	21	5	4	5	5	8	7.28011	0.002	0.00025
ENSMUSG00000029330	Cds1	1	90	3	25	0.3	0.9	23.84	38.3835	0.457	0.0191695
ENSMUSG00000030264	Thumpd3	1	8	7	5	7	4	6.2	1.64317	0.547	0.0882258
ENSMUSG00000030400	Ercc2	1	31	10	19	10	7	15.4	9.81326	13.4	0.87013
ENSMUSG00000030403	Vasp	1	31	57	46	21	22	35.4	15.6939	149	4.20904
ENSMUSG00000030603	Psmc4	1	109	55	97	81	67	81.8	21.8449	562	6.87042
ENSMUSG00000030655	Smg1	1	16	10	4	5	5	8	5.04975	2.03	0.25375
ENSMUSG00000030685	Kctd13	1	215	7	11	4	2	47.8	93.5291	0.209	0.00437238
ENSMUSG00000030852	Tacc2	1	31	136	23	5	141	67.2	65.7891	18.1	0.269345
ENSMUSG00000030895	Hpx	1	4	21	62	8903	12	1800.4	3970.54	1715	0.952566
ENSMUSG00000031075	Ano1	1	4	9	5	2	1	4.2	3.11448	0.327	0.0778571
ENSMUSG00000031099	Smarca1	1	8	0.5	0.5	0.1	0.9	2	3.36601	3.89	1.945
ENSMUSG00000031386	Hcfc1	1	55	36	22	17	18	29.6	16.1028	59	1.99324
ENSMUSG00000031443	F7	1	0.4	0.8	4	214	0.3	43.9	95.1011	3.23	0.0735763
ENSMUSG00000031592	Pcm1	1	22	15	4	4	8	10.6	7.79744	1.73	0.163208
ENSMUSG00000031594	Fgl1	1	0.2	0.4	1	178	0.3	35.98	79.3922	1.19	0.0330739
ENSMUSG00000032231	Anxa2	1	9	33	44	6	25	23.4	16.0406	446	19.0598
ENSMUSG00000032294	Pkm	1	2802	1353	428	26	3418	1605.4	1471.55	2209	1.37598
ENSMUSG00000032312	Csk	1	63	30	52	61	8	42.8	23.4457	4.4	0.102804
ENSMUSG00000032332	Col12a1	1	4	0.5	2	0.4	1	1.58	1.49399	8.02	5.07595
ENSMUSG00000032366	Tpm1	1	71	1911	28	12	3395	1083.4	1526.04	648	0.598117
ENSMUSG00000032384	Csnk1g1	1	10	4	2	1	1	3.6	3.78153	0.935	0.259722
ENSMUSG00000032440	Tgfbr2	1	20	47	30	11	12	24	14.9499	0.531	0.022125
ENSMUSG00000032518	Rpsa	1	249	178	534	291	228	296	139.128	1888	6.37838
ENSMUSG00000032657	Fam189b	1	78	6	6	0.6	13	20.72	32.3217	0.097	0.00468147
ENSMUSG00000032725	Folr2	1	2	12	9	15	12	10	4.94975	0.624	0.0624
ENSMUSG00000033065	Pfkm	1	555	949	51	17	2221	758.6	903.74	36.1	0.0475877
ENSMUSG00000033335	Dnm2	1	67	58	63	37	19	48.8	20.2781	61.5	1.26025
ENSMUSG00000033417	Cacul1	1	26	14	12	26	13	18.2	7.15542	0.534	0.0293407
ENSMUSG00000033446	Lpar6	1	1	3	5	5	0.8	2.96	2.05134	0.008	0.0027027
ENSMUSG00000033526	Ppip5k1	1	38	20	9	1	13	16.2	13.9893	0.601	0.0370988
ENSMUSG00000033781	Asb13	1	55	12	45	35	8	31	20.4817	0.006	0.000193548
ENSMUSG00000034088	Hdlbp	1	79	153	60	136	80	101.6	40.4141	108	1.06299
ENSMUSG00000034243	Golgb1	1	27	13	15	12	10	15.4	6.73053	1.95	0.126623
ENSMUSG00000034341	Wbp2	1	591	122	189	122	44	213.6	217.13	19.9	0.0931648
ENSMUSG00000034501	Pcnx4	1	16	2	2	3	2	5	6.16441	0	0
ENSMUSG00000034538	Zfp418	1	1	1	2	0.3	0.4	0.94	0.676757	0.028	0.0297872
ENSMUSG00000034543	Morc2a	1	27	16	12	9	9	14.6	7.50333	1.15	0.0787671
ENSMUSG00000034614	Pik3ip1	1	22	15	7	0.3	15	11.86	8.36349	5.03	0.424115
ENSMUSG00000034940	Synrg	1	38	16	7	8	14	16.6	12.5618	16.1	0.96988
ENSMUSG00000035413	Tmem98	1	39	40	16	17	2	22.8	16.3615	0.704	0.0308772
ENSMUSG00000035517	Tdrd7	1	27	10	15	17	5	14.8	8.25833	0.254	0.0171622
ENSMUSG00000035632	Cnot3	1	49	19	22	15	8	22.6	15.6621	53.8	2.38053
ENSMUSG00000035845	Alg12	1	13	10	19	11	4	11.4	5.41295	0.157	0.0137719
ENSMUSG00000036057	Ptpn23	1	72	22	49	14	7	32.8	27.0869	23.5	0.716463
ENSMUSG00000036273	Lrrk2	1	12	4	13	0.2	1	6.04	6.0752	0.052	0.00860927
ENSMUSG00000036275	9530068E07Rik	1	61	70	163	80	34	81.6	48.6138	1.53	0.01875
ENSMUSG00000036667	Tcaf1	1	83	5	3	0.6	1	18.52	36.0881	0.324	0.0174946
ENSMUSG00000036966	Spryd3	1	245	19	30	23	8	65	100.938	0.365	0.00561538
ENSMUSG00000036983	Tfb1m	1	4	7	9	9	4	6.6	2.50998	1.6	0.242424
ENSMUSG00000037049	Smpd1	1	199	260	123	75	43	140	89.1684	4.49	0.0320714
ENSMUSG00000037499	Nenf	1	160	81	139	16	64	92	58.1249	7.51	0.0816304
ENSMUSG00000038463	Olfml2b	1	9	21	3	0.2	4	7.44	8.21998	0.654	0.0879032
ENSMUSG00000038793	Lefty1	1	2	0.5	0.2	0.4	0.6	0.74	0.719722	0.032	0.0432432
ENSMUSG00000038861	Pi4kb	1	53	22	23	25	14	27.4	14.9097	18	0.656934
ENSMUSG00000038876	Rnf146	1	23	12	4	7	12	11.6	7.23187	0.04	0.00344828
ENSMUSG00000038894	Irs2	1	54	10	11	17	9	20.2	19.1494	0.562	0.0278218
ENSMUSG00000039384	Dusp10	1	14	7	3	3	31	11.6	11.7388	1.17	0.100862
ENSMUSG00000039519	Cyp7b1	1	12	2	72	233	0.8	63.96	98.9536	23.7	0.370544
ENSMUSG00000039683	Sdk1	1	5	0.7	0.9	0.1	0.5	1.44	2.01196	0.212	0.147222
ENSMUSG00000039841	Zfp800	1	6	4	1	2	0.7	2.74	2.23338	0.738	0.269343
ENSMUSG00000040351	Ankib1	1	17	5	13	6	2	8.6	6.1887	0.115	0.0133721
ENSMUSG00000040648	Ppip5k2	1	5	24	1	7	0.4	7.48	9.63597	1.3	0.173797
ENSMUSG00000040731	Eif4h	1	466	123	223	163	83	211.6	151.327	251	1.1862
ENSMUSG00000040761	Spen	1	30	14	12	9	7	14.4	9.12688	1.17	0.08125
ENSMUSG00000041199	Rpusd1	1	157	8	12	3	5	37	67.1677	0.002	5.40541e-05
ENSMUSG00000041258	Zfp236	1	16	8	6	5	4	7.8	4.81664	0.023	0.00294872
ENSMUSG00000041577	Prelp	1	45	89	43	43	24	48.8	24.0458	9.9	0.202869
ENSMUSG00000042426	Dhx29	1	21	14	9	10	10	12.8	4.96991	19.5	1.52344
ENSMUSG00000042446	Zmym4	1	18	8	6	3	3	7.6	6.1887	21.6	2.84211
ENSMUSG00000042616	Oscp1	1	22	1	3	0.3	0.8	5.42	9.32534	1.18	0.217712
ENSMUSG00000042744	Hectd4	1	113	17	8	8	7	30.6	46.2418	0.269	0.00879085
ENSMUSG00000043811	Rtn4r	1	203	17	10	0.1	0.3	46.08	88.0075	0.025	0.000542535
ENSMUSG00000043866	Taf10	1	21	10	32	21	10	18.8	9.20326	7.58	0.403191
ENSMUSG00000044149	Nkrf	1	27	4	1	3	1	7.2	11.1445	1.79	0.248611
ENSMUSG00000044217	Aqp5	1	1	0.7	3	0.5	0.1	1.06	1.1327	1.2	1.13208
ENSMUSG00000044811	Cd300c2	1	4	1	2	4	0.4	2.28	1.67093	0.883	0.387281
ENSMUSG00000045100	Slc25a26	1	20	23	17	8	17	17	5.61249	0.875	0.0514706
ENSMUSG00000045282	Tmem86b	1	21	9	41	180	4	51	73.5085	0.015	0.000294118
ENSMUSG00000046111	Cep295	1	4	1	1	0.7	0.9	1.52	1.39176	0.5	0.328947
ENSMUSG00000046761	Fam83h	1	5	0.4	17	11	0.3	6.74	7.21304	0.783	0.116172
ENSMUSG00000047977	Synb	1	1	0.8	0.9	0.4	1	0.82	0.248998	0.247	0.30122
ENSMUSG00000048279	Sacs	1	11	7	0.1	0.1	1	3.84	4.93184	0.14	0.0364583
ENSMUSG00000049090	Zadh2	1	22	60	38	52	19	38.2	18.0056	13.1	0.342932
ENSMUSG00000049354	Dcaf7	1	135	40	17	16	15	44.6	51.5975	92.6	2.07623
ENSMUSG00000049643	2310022A10Rik	1	26	35	7	4	26	19.6	13.4276	1.63	0.0831633
ENSMUSG00000049680	Urgcp	1	51	34	26	13	19	28.6	14.775	0.535	0.0187063
ENSMUSG00000051586	Mical3	1	60	48	11	9	15	28.6	23.6707	0.253	0.00884615
ENSMUSG00000051984	Sec31b	1	0.5	18	6	4	25	10.7	10.3537	0.122	0.0114019
ENSMUSG00000052336	Cx3cr1	1	42	4	2	0.4	0.3	9.74	18.0964	0.431	0.0442505
ENSMUSG00000052384	Nrros	1	7	5	3	3	2	4	2	0.201	0.05025
ENSMUSG00000052504	Epha3	1	3	0.3	0.2	0.4	0.1	0.8	1.23491	0.233	0.29125
ENSMUSG00000052698	Tln2	1	45	28	39	2	28	28.4	16.4712	23	0.809859
ENSMUSG00000053768	Chchd3	1	26	110	86	38	82	68.4	35.1682	78	1.14035
ENSMUSG00000053898	Ech1	1	33	490	391	144	88	229.2	199.929	56	0.244328
ENSMUSG00000054091	1810037I17Rik	1	38	21	76	15	11	32.2	26.565	1.07	0.0332298
ENSMUSG00000054309	Cpsf3	1	62	41	35	36	12	37.2	17.8241	57.1	1.53495
ENSMUSG00000057400	Ces1c	1	0.8	5	21	1947	2	395.16	867.543	125	0.316328
ENSMUSG00000057406	Nsd2	1	11	3	2	2	1	3.8	4.08656	2.69	0.707895
ENSMUSG00000058709	Egln2	1	108	28	61	44	68	61.8	30.1364	0.334	0.00540453
ENSMUSG00000058818	Pirb	1	0.2	3	2	3	1	1.84	1.23612	0.22	0.119565
ENSMUSG00000059552	Trp53	1	27	18	24	19	8	19.2	7.25948	9.36	0.4875
ENSMUSG00000060427	Zfp868	1	7	4	5	3	3	4.4	1.67332	0.202	0.0459091
ENSMUSG00000060807	Serpina6	1	0.5	0.2	6	237	0.1	48.76	105.259	206	4.22477
ENSMUSG00000061950	Ppp4r1	1	23	21	19	13	8	16.8	6.18061	31.5	1.875
ENSMUSG00000062545	Tlr12	1	1	0.1	23	4	0.1	5.64	9.8358	0.299	0.0530142
ENSMUSG00000063558	Aox1	1	3	9	1	21	7	8.2	7.82304	0.578	0.0704878
ENSMUSG00000064294	Aox3	1	0.4	0.8	2	152	0.3	31.1	67.5885	8.09	0.260129
ENSMUSG00000066440	Zfyve26	1	11	8	7	11	6	8.6	2.30217	0.058	0.00674419
ENSMUSG00000066735	Vkorc1l1	1	36	13	14	24	12	19.8	10.2567	3.47	0.175253
ENSMUSG00000068966	Zbtb34	1	8	5	2	2	2	3.8	2.68328	0.008	0.00210526
ENSMUSG00000069874	Irgm2	1	2	23	11	42	9	17.4	15.6939	0.675	0.0387931
ENSMUSG00000070327	Rnf213	1	3	15	7	19	4	9.6	7.05691	11.4	1.1875
ENSMUSG00000073791	Efcab7	1	1	0.4	2	0.1	0.1	0.72	0.804363	0.614	0.852778
ENSMUSG00000074513	Arfip1	1	1	3	4	4	2	2.8	1.30384	9.22	3.29286
ENSMUSG00000074634	Tmem267	1	3	2	4	2	3	2.8	0.83666	0.004	0.00142857
ENSMUSG00000074634	Tmem267	1	3	2	4	2	3	2.8	0.83666	0.004	0.00142857
ENSMUSG00000075528	Aarsd1	1	4	2	2	1	2	2.2	1.09545	67.5	30.6818
ENSMUSG00000078485	Plekhn1	1	10	3	6	0.7	2	4.34	3.7186	1.57	0.361751
ENSMUSG00000078485	Plekhn1	1	10	3	6	0.7	2	4.34	3.7186	0.164	0.037788
ENSMUSG00000078789	Dph1	1	13	5	18	11	4	10.2	5.80517	39.7	3.89216
ENSMUSG00000079442	St6galnac4	1	26	11	2	1	7	9.4	10.1143	0.008	0.000851064
ENSMUSG00000092035	Peg10	1	32	1	3	0.7	0.8	7.5	13.7284	43.8	5.84
ENSMUSG00000001418	Glmp	0.99	29	16	62	29	6	28.4	21.1258	3.08	0.108451
ENSMUSG00000001774	Chordc1	0.99	28	25	14	26	15	21.6	6.58027	254	11.7593
ENSMUSG00000003198	Zfp959	0.99	4	2	2	3	1	2.4	1.14018	0.279	0.11625
ENSMUSG00000003228	Grk5	0.99	9	18	4	4	3	7.6	6.26897	0.385	0.0506579
ENSMUSG00000003402	Prkcsh	0.99	147	69	187	162	24	117.8	68.5106	466	3.95586
ENSMUSG00000003660	Snrnp200	0.99	53	42	27	23	18	32.6	14.5017	17	0.521472
ENSMUSG00000004085	Map3k20	0.99	4	103	4	3	95	41.8	52.2944	1.39	0.0332536
ENSMUSG00000004730	Adgre1	0.99	4	6	2	9	2	4.6	2.96648	0.937	0.203696
ENSMUSG00000007029	Vars	0.99	46	25	23	28	16	27.6	11.1937	79.4	2.87681
ENSMUSG00000007837	Prrg2	0.99	15	5	46	36	10	22.4	17.7003	0.541	0.0241518
ENSMUSG00000009292	Trpm2	0.99	13	0.2	0.3	1	0.1	2.92	5.64597	0.039	0.0133562
ENSMUSG00000010797	Wnt2	0.99	6	1	2	2	1	2.4	2.07364	0.003	0.00125
ENSMUSG00000012640	Zfp715	0.99	11	10	2	3	2	5.6	4.50555	0.092	0.0164286
ENSMUSG00000015027	Galns	0.99	12	6	109	8	2	27.4	45.7581	8.75	0.319343
ENSMUSG00000015143	Actn1	0.99	92	35	26	21	5	35.8	33.2521	275	7.68156
ENSMUSG00000015647	Lama5	0.99	6	42	40	1	7	19.2	20.0425	2.04	0.10625
ENSMUSG00000015981	Stk32c	0.99	248	2	5	0.4	0.3	51.14	110.064	1.5	0.0293312
ENSMUSG00000017428	Psmd11	0.99	52	43	30	59	35	43.8	11.9038	235	5.3653
ENSMUSG00000018326	Ywhab	0.99	464	67	86	66	24	141.4	181.758	1017	7.19236
ENSMUSG00000018565	Elp5	0.99	56	23	27	19	17	28.4	15.8997	73.9	2.60211
ENSMUSG00000018574	Acadvl	0.99	29	422	131	159	121	172.4	147.817	108	0.62645
ENSMUSG00000018930	Ccl4	0.99	0.7	0.9	0.3	0.1	0.2	0.44	0.343511	1.5	3.40909
ENSMUSG00000019853	Hebp2	0.99	5	1	3	0.5	0.4	1.98	1.98796	0.972	0.490909
ENSMUSG00000019929	Dcn	0.99	28	411	45	110	108	140.4	155.67	52.9	0.376781
ENSMUSG00000019970	Sgk1	0.99	69	34	28	9	61	40.2	24.611	8.23	0.204726
ENSMUSG00000020448	Rnf185	0.99	37	21	31	30	16	27	8.39643	0.011	0.000407407
ENSMUSG00000020521	Rnft1	0.99	7	8	5	9	6	7	1.58114	0.004	0.000571429
ENSMUSG00000020646	Mboat2	0.99	19	4	4	0.3	0.4	5.54	7.74261	0.147	0.0265343
ENSMUSG00000020790	Ankfy1	0.99	15	10	8	7	4	8.8	4.08656	34	3.86364
ENSMUSG00000021140	Pcnx	0.99	38	27	7	7	21	20	13.3417	0.143	0.00715
ENSMUSG00000021185	Dglucy	0.99	9	42	79	23	8	32.2	29.5584	8.49	0.263665
ENSMUSG00000021217	Tshz3	0.99	19	2	0.3	0.4	1	4.54	8.1116	0.075	0.0165198
ENSMUSG00000021240	Abcd4	0.99	16	8	34	10	7	15	11.1803	0.476	0.0317333
ENSMUSG00000021494	Ddx41	0.99	47	11	47	31	9	29	18.5472	12.1	0.417241
ENSMUSG00000021639	Gtf2h2	0.99	10	4	7	4	4	5.8	2.68328	51.5	8.87931
ENSMUSG00000022130	Tgds	0.99	3	6	10	11	3	6.6	3.78153	0.29	0.0439394
ENSMUSG00000022193	Psmb5	0.99	181	73	281	115	132	156.4	79.6794	279	1.78389
ENSMUSG00000022221	Ripk3	0.99	0.9	3	0.2	1	0.8	1.18	1.06395	1.99	1.68644
ENSMUSG00000022346	Myc	0.99	9	5	9	18	3	8.8	5.76194	1.44	0.163636
ENSMUSG00000022419	Deptor	0.99	8	6	12	38	20	16.8	13.0077	2.96	0.17619
ENSMUSG00000022420	Dnal4	0.99	69	17	29	8	4	25.4	26.1973	4.79	0.188583
ENSMUSG00000022518	4930562C15Rik	0.99	0.3	0.1	0.5	0.2	0.3	0.28	0.148324	0.184	0.657143
ENSMUSG00000022526	Zfp251	0.99	30	11	9	0.8	4	10.96	11.3802	0.139	0.0126825
ENSMUSG00000022702	Hira	0.99	12	2	6	2	3	5	4.24264	1.84	0.368
ENSMUSG00000022861	Dgkg	0.99	30	0.5	2	0.1	0.2	6.56	13.1257	0.595	0.0907012
ENSMUSG00000022972	Cfap298	0.99	33	14	38	15	26	25.2	10.663	0.723	0.0286905
ENSMUSG00000023025	Larp4	0.99	14	21	7	18	5	13	6.89202	67.2	5.16923
ENSMUSG00000024135	Srbd1	0.99	11	6	6	10	2	7	3.60555	12.9	1.84286
ENSMUSG00000024269	Tpgs2	0.99	20	4	2	2	2	6	7.87401	0.007	0.00116667
ENSMUSG00000024742	Fen1	0.99	1	0.3	1	0.4	0.1	0.56	0.415933	19.2	34.2857
ENSMUSG00000024816	Frmd8	0.99	25	7	16	13	4	13	8.21584	0.903	0.0694615
ENSMUSG00000024901	Peli3	0.99	29	1	2	2	2	7.2	12.1943	0.002	0.000277778
ENSMUSG00000024908	Ppp6r3	0.99	39	54	42	33	28	39.2	9.88433	97.5	2.48724
ENSMUSG00000025137	Pcyt2	0.99	97	26	176	329	17	129	128.827	50.5	0.391473
ENSMUSG00000025278	Flnb	0.99	29	26	34	24	6	23.8	10.6395	181	7.60504
ENSMUSG00000025413	Ttc4	0.99	32	11	20	10	17	18	8.86002	111	6.16667
ENSMUSG00000025571	Tnrc6c	0.99	24	15	7	4	7	11.4	8.14248	0.088	0.0077193
ENSMUSG00000025872	Thoc3	0.99	26	11	32	14	8	18.2	10.3053	92.2	5.06593
ENSMUSG00000025991	Cps1	0.99	0.4	7	12	2349	1	473.88	1048.23	518	1.0931
ENSMUSG00000026117	Zap70	0.99	5	0.4	0.1	3	0.4	1.78	2.14988	2.68	1.50562
ENSMUSG00000026131	Dst	0.99	5	5	1	0.9	2	2.78	2.07171	1.24	0.446043
ENSMUSG00000026159	Agfg1	0.99	26	12	7	5	6	11.2	8.70057	125	11.1607
ENSMUSG00000026437	Cdk18	0.99	56	18	43	27	3	29.4	20.7678	1.3	0.0442177
ENSMUSG00000026843	Fubp3	0.99	19	6	8	7	2	8.4	6.34823	12.7	1.5119
ENSMUSG00000027189	Trim44	0.99	140	27	37	20	12	47.2	52.6849	0.473	0.0100212
ENSMUSG00000027306	Nusap1	0.99	2	0.8	0.2	0.6	0.5	0.82	0.694262	41.5	50.6098
ENSMUSG00000027439	Gzf1	0.99	24	14	13	25	9	17	7.10634	0.041	0.00241176
ENSMUSG00000027580	Helz2	0.99	3	11	5	37	3	11.8	14.4637	0.239	0.0202542
ENSMUSG00000027582	Zgpat	0.99	36	10	16	9	8	15.8	11.7132	30.6	1.93671
ENSMUSG00000028076	Cd1d1	0.99	1	3	8	111	2	25	48.1508	2.59	0.1036
ENSMUSG00000028339	Col15a1	0.99	6	70	16	6	13	22.2	27.0777	1.97	0.0887387
ENSMUSG00000028358	Zfp618	0.99	4	0.2	5	0.3	0.1	1.92	2.38265	0.125	0.0651042
ENSMUSG00000028468	Rgp1	0.99	28	29	23	23	16	23.8	5.1672	0.336	0.0141176
ENSMUSG00000028549	Itgb3bp	0.99	1	1	0.3	0.7	0.8	0.76	0.288097	0.428	0.563158
ENSMUSG00000028630	Dyrk2	0.99	16	15	12	16	30	17.8	7.01427	0.037	0.00207865
ENSMUSG00000028878	Fam76a	0.99	40	20	23	9	13	21	11.9791	0.485	0.0230952
ENSMUSG00000029062	Cdk11b	0.99	62	33	34	24	30	36.6	14.7241	43.1	1.1776
ENSMUSG00000029148	Nrbp1	0.99	128	98	66	57	62	82.2	30.2192	67	0.815085
ENSMUSG00000029445	Hpd	0.99	0.2	4	121	2663	2	558.04	1177.84	139	0.249086
ENSMUSG00000029458	Brap	0.99	29	10	24	28	8	19.8	10.0598	0.45	0.0227273
ENSMUSG00000029634	Rnf6	0.99	30	22	27	15	14	21.6	7.09225	0.903	0.0418056
ENSMUSG00000029657	Hsph1	0.99	263	52	43	58	50	93.2	95.0721	173	1.85622
ENSMUSG00000029722	Agfg2	0.99	53	9	29	30	3	24.8	19.7788	1.79	0.0721774
ENSMUSG00000029994	Anxa4	0.99	3	6	34	18	5	13.2	13.0269	91.3	6.91667
ENSMUSG00000030089	Slc41a3	0.99	15	126	7	1	63	42.4	52.7523	0.027	0.000636792
ENSMUSG00000030094	Xpc	0.99	7	5	15	6	5	7.6	4.219	1.33	0.175
ENSMUSG00000030272	Camk1	0.99	29	14	14	3	9	13.8	9.62808	2.5	0.181159
ENSMUSG00000030465	Psd3	0.99	57	7	0.8	5	3	14.56	23.8363	8.84	0.607143
ENSMUSG00000030714	Sgf29	0.99	20	13	16	23	12	16.8	4.65833	0.934	0.0555952
ENSMUSG00000031093	Dock11	0.99	2	1	0.1	0.2	0.5	0.76	0.776531	0.539	0.709211
ENSMUSG00000031119	Gpc4	0.99	22	56	167	72	14	66.2	61.1899	3.82	0.0577039
ENSMUSG00000031166	Wdr13	0.99	109	23	24	13	6	35	42.0298	1.16	0.0331429
ENSMUSG00000031292	Cdkl5	0.99	25	2	0.4	0.9	0.2	5.7	10.8116	0.396	0.0694737
ENSMUSG00000031310	Zmym3	0.99	59	13	11	4	4	18.2	23.1668	0.973	0.0534615
ENSMUSG00000031328	Flna	0.99	36	67	39	9	25	35.2	21.312	247	7.01705
ENSMUSG00000031669	Gins3	0.99	4	2	0.5	0.4	0.6	1.5	1.54272	101	67.3333
ENSMUSG00000031792	Usb1	0.99	8	9	18	10	4	9.8	5.11859	0.314	0.0320408
ENSMUSG00000031877	Ces2g	0.99	0.4	4	5	48	0.7	11.62	20.436	11.2	0.963855
ENSMUSG00000031958	Ldhd	0.99	11	24	340	93	16	96.8	139.956	24.4	0.252066
ENSMUSG00000032006	Pdgfd	0.99	3	7	6	0.5	0.8	3.46	2.95939	0.016	0.00462428
ENSMUSG00000032609	Klhdc8b	0.99	14	3	6	2	1	5.2	5.26308	0.109	0.0209615
ENSMUSG00000032624	Eml4	0.99	14	5	4	7	1	6.2	4.86826	53.7	8.66129
ENSMUSG00000032816	Igdcc4	0.99	33	10	0.4	0.2	11	10.92	13.3601	0.043	0.00393773
ENSMUSG00000032913	Lrig2	0.99	7	3	3	1	1	3	2.44949	0	0
ENSMUSG00000033047	Eif3l	0.99	100	109	192	106	49	111.2	51.3683	177	1.59173
ENSMUSG00000033557	Fam20b	0.99	32	24	18	6	10	18	10.4881	2.16	0.12
ENSMUSG00000034083	Ccdc174	0.99	3	2	1	1	1	1.6	0.894427	2.66	1.6625
ENSMUSG00000034157	Cipc	0.99	57	27	11	13	15	24.6	19.152	0.011	0.000447154
ENSMUSG00000034327	Kctd9	0.99	9	24	5	3	14	11	8.39643	0.218	0.0198182
ENSMUSG00000034560	Washc4	0.99	12	6	4	7	2	6.2	3.76829	16.8	2.70968
ENSMUSG00000034837	Gnat1	0.99	0.3	0.1	3	28	0.1	6.3	12.1928	9.73	1.54444
ENSMUSG00000035390	Brsk1	0.99	445	2	2	0.3	0.5	89.96	198.475	0.678	0.00753668
ENSMUSG00000036256	Igfbp7	0.99	58	197	1914	76	41	457.2	816.68	11.1	0.0242782
ENSMUSG00000037103	Dcaf15	0.99	34	12	29	6	7	17.6	13.0115	1.13	0.0642045
ENSMUSG00000037221	Mospd3	0.99	62	29	64	89	15	51.8	29.626	0.67	0.0129344
ENSMUSG00000037347	Chst7	0.99	4	3	20	0.5	0.9	5.68	8.13554	0.795	0.139965
ENSMUSG00000037993	Dhx38	0.99	44	15	24	19	11	22.6	12.8957	1.75	0.0774336
ENSMUSG00000038224	Serpinf2	0.99	1	4	236	1009	2	250.4	435.975	234	0.934505
ENSMUSG00000038608	Dock10	0.99	7	0.9	0.5	0.4	0.3	1.82	2.90465	0.885	0.486264
ENSMUSG00000038697	Taf5l	0.99	18	10	9	11	9	11.4	3.78153	0.438	0.0384211
ENSMUSG00000038990	Cables2	0.99	30	11	10	17	5	14.6	9.60729	0.966	0.0661644
ENSMUSG00000039158	Akna	0.99	5	4	3	1	1	2.8	1.78885	0.128	0.0457143
ENSMUSG00000039382	Wdr45	0.99	43	17	35	22	12	25.8	12.8725	0.715	0.0277132
ENSMUSG00000039748	Exo1	0.99	0.2	0.2	0.1	0.1	0.1	0.14	0.0547723	0.659	4.70714
ENSMUSG00000039982	Dtx4	0.99	35	6	10	10	4	13	12.5698	1.16	0.0892308
ENSMUSG00000040717	Il17rd	0.99	2	3	3	0.2	1	1.84	1.23612	0	0
ENSMUSG00000041164	Zmiz2	0.99	457	72	98	32	51	142	177.793	0.591	0.00416197
ENSMUSG00000041263	Rusc1	0.99	94	4	3	2	3	21.2	40.7026	0.627	0.0295755
ENSMUSG00000041638	Gcn1l1	0.99	32	20	22	17	11	20.4	7.70065	10.3	0.504902
ENSMUSG00000041781	Cpsf2	0.99	20	9	5	9	5	9.6	6.14817	38.8	4.04167
ENSMUSG00000042115	Klhdc8a	0.99	30	25	34	2	0.2	18.24	15.9809	0	0
ENSMUSG00000042178	Armc5	0.99	29	16	34	13	8	20	11.0227	0.542	0.0271
ENSMUSG00000042202	Slc35e2	0.99	34	8	5	24	2	14.6	13.7768	0.217	0.014863
ENSMUSG00000042323	Pbrm1	0.99	13	15	6	7	5	9.2	4.49444	15.2	1.65217
ENSMUSG00000042595	Fam199x	0.99	5	2	0.6	2	1	2.12	1.72395	0.004	0.00188679
ENSMUSG00000042807	Hecw2	0.99	9	3	0.6	0.2	0.4	2.64	3.73202	0.14	0.0530303
ENSMUSG00000043140	Tmem186	0.99	19	24	14	10	15	16.4	5.31977	1.64	0.1
ENSMUSG00000044595	Dnd1	0.99	4	2	0.8	0.4	0.4	1.52	1.53362	0.71	0.467105
ENSMUSG00000044629	Cnrip1	0.99	41	1	2	0.4	0.7	9.02	17.8875	36.8	4.07982
ENSMUSG00000045348	Nyap1	0.99	94	1	2	0.1	0.2	19.46	41.6761	0.664	0.0341213
ENSMUSG00000046516	Cox17	0.99	6	6	6	3	3	4.8	1.64317	14.9	3.10417
ENSMUSG00000046574	Prr12	0.99	68	22	20	7	7	24.8	25.1535	0.359	0.0144758
ENSMUSG00000047921	Trappc9	0.99	73	27	25	9	15	29.8	25.2428	2.06	0.0691275
ENSMUSG00000048126	Col6a3	0.99	2	16	6	1	13	7.6	6.65582	13.7	1.80263
ENSMUSG00000049804	Armcx4	0.99	21	6	4	0.5	13	8.9	8.15782	0.116	0.0130337
ENSMUSG00000050350	Gpr18	0.99	0.2	0.6	0.4	0.2	0.9	0.46	0.296648	0.013	0.0282609
ENSMUSG00000050973	Gdpgp1	0.99	6	2	4	4	1	3.4	1.94936	0.331	0.0973529
ENSMUSG00000051339	2900026A02Rik	0.99	46	31	19	51	25	34.4	13.6675	0.072	0.00209302
ENSMUSG00000051674	Dcun1d4	0.99	36	4	6	9	2	11.4	13.9929	0.064	0.00561404
ENSMUSG00000051890	Klhdc1	0.99	10	13	0.8	0.2	8	6.4	5.67627	0	0
ENSMUSG00000052512	Nav2	0.99	10	14	6	8	2	8	4.47214	0.142	0.01775
ENSMUSG00000052889	Prkcb	0.99	182	1	0.8	0.6	0.2	36.92	81.1027	8.82	0.238895
ENSMUSG00000053604	Rpia	0.99	6	6	7	3	7	5.8	1.64317	4.77	0.822414
ENSMUSG00000054612	Mgmt	0.99	4	6	13	16	6	9	5.19615	0.402	0.0446667
ENSMUSG00000056211	R3hdm1	0.99	29	7	2	2	4	8.8	11.4761	0.818	0.0929545
ENSMUSG00000059406	Tmprss9	0.99	0.5	0.1	4	0.1	0.2	0.98	1.69617	0.006	0.00612245
ENSMUSG00000060279	Ap2a1	0.99	341	64	49	32	36	104.4	132.854	25.3	0.242337
ENSMUSG00000060477	Irak2	0.99	19	7	20	20	4	14	7.84219	0.211	0.0150714
ENSMUSG00000061046	Haghl	0.99	73	3	27	2	4	21.8	30.4582	0.836	0.0383486
ENSMUSG00000062232	Rapgef2	0.99	43	11	4	4	2	12.8	17.225	0.663	0.0517969
ENSMUSG00000062825	Actg1	0.99	1024	304	696	407	109	508	357.987	10155	19.9902
ENSMUSG00000063019	Manbal	0.99	135	26	60	18	23	52.4	49.0541	0.587	0.0112023
ENSMUSG00000063316	Rpl27	0.99	72	58	234	73	59	99.2	75.6816	971	9.78831
ENSMUSG00000066621	Tecpr1	0.99	50	12	12	3	6	16.6	19.0735	0.249	0.015
ENSMUSG00000066800	Rnasel	0.99	5	3	1	0.6	0.7	2.06	1.91259	0.037	0.0179612
ENSMUSG00000068284	Usf3	0.99	16	10	9	9	12	11.2	2.94958	0.136	0.0121429
ENSMUSG00000068394	Cep152	0.99	3	1	2	0.8	0.7	1.5	0.984886	0.66	0.44
ENSMUSG00000069922	Ces3a	0.99	3	9	21	2552	3	517.6	1137.29	136	0.262751
ENSMUSG00000070426	Rnf121	0.99	20	7	9	11	10	11.4	5.02991	0.805	0.070614
ENSMUSG00000071654	Uqcc3	0.99	31	28	82	29	59	45.8	23.9937	0.996	0.0217467
ENSMUSG00000071657	Bscl2	0.99	51	11	38	18	8	25.2	18.5661	0.124	0.00492063
ENSMUSG00000073131	Vma21	0.99	16	6	3	8	4	7.4	5.17687	2.04	0.275676
ENSMUSG00000073702	Rpl31	0.99	113	55	154	80	79	96.2	38.3367	653	6.78794
ENSMUSG00000074925	Ptar1	0.99	4	3	2	2	3	2.8	0.83666	0.073	0.0260714
ENSMUSG00000075273	Ttc30b	0.99	10	11	6	2	0.5	5.9	4.66905	0.083	0.0140678
ENSMUSG00000078867	Gm14418	0.99	2	0.6	1	0.3	0.4	0.86	0.691375	0.156	0.181395
ENSMUSG00000079109	Pms2	0.99	4	1	0.9	0.6	0.9	1.48	1.41669	0.31	0.209459
ENSMUSG00000079469	Pigb	0.99	6	2	3	3	1	3	1.87083	0.096	0.032
ENSMUSG00000079469	Pigb	0.99	6	2	3	3	1	3	1.87083	0.792	0.264
ENSMUSG00000081769	Gm12216	0.99	1	0.7	0.5	0.6	1	0.76	0.230217	0.008	0.0105263
ENSMUSG00000089917	Uckl1	0.99	15	12	15	8	7	11.4	3.78153	0.418	0.0366667
ENSMUSG00000001366	Fbxo9	0.98	68	23	26	33	24	34.8	18.9658	0.237	0.00681034
ENSMUSG00000001829	Clpb	0.98	23	22	20	14	18	19.4	3.57771	3.92	0.202062
ENSMUSG00000002781	Tmem143	0.98	21	63	25	11	26	29.2	19.804	1.79	0.0613014
ENSMUSG00000002799	Jag2	0.98	45	25	6	0.2	17	18.64	17.5911	0	0
ENSMUSG00000002910	Arrdc2	0.98	29	15	14	11	61	26	20.7605	1.98	0.0761538
ENSMUSG00000003437	Paf1	0.98	40	34	32	19	18	28.6	9.68504	92.8	3.24476
ENSMUSG00000003534	Ddr1	0.98	115	32	108	2	9	53.2	54.4215	0.148	0.00278195
ENSMUSG00000003617	Cp	0.98	4	17	6	280	1	61.6	122.239	273	4.43182
ENSMUSG00000006154	Eps8l1	0.98	8	3	7	0.8	2	4.16	3.1667	0.612	0.147115
ENSMUSG00000006476	Nsmf	0.98	473	10	37	79	6	121	198.916	1.5	0.0123967
ENSMUSG00000007122	Casq1	0.98	2	31	0.9	2	2571	521.38	1145.84	156	0.299206
ENSMUSG00000007867	Ift43	0.98	19	22	26	6	8	16.2	8.78635	1.37	0.0845679
ENSMUSG00000010067	Rassf1	0.98	3	3	3	0.8	3	2.56	0.98387	0.062	0.0242188
ENSMUSG00000011158	Brf1	0.98	35	19	25	13	14	21.2	9.06642	0.891	0.0420283
ENSMUSG00000011254	Thg1l	0.98	6	3	5	1	2	3.4	2.07364	11.7	3.44118
ENSMUSG00000013236	Ptprs	0.98	475	48	20	2	16	112.2	203.497	2.15	0.0191622
ENSMUSG00000016921	Srsf6	0.98	57	56	42	39	17	42.2	16.2388	34.8	0.824645
ENSMUSG00000017670	Elmo2	0.98	120	12	14	5	5	31.2	49.8066	19.5	0.625
ENSMUSG00000017950	Hnf4a	0.98	0.2	1	297	461	1	152.04	215.146	1.22	0.0080242
ENSMUSG00000018651	Tada2a	0.98	27	6	4	4	6	9.4	9.88939	0.206	0.0219149
ENSMUSG00000019039	Dalrd3	0.98	88	20	120	32	8	53.6	48.1331	0.219	0.00408582
ENSMUSG00000019734	Tmc4	0.98	6	1	31	3	0.9	8.38	12.813	0.007	0.000835322
ENSMUSG00000020230	Prmt2	0.98	96	10	10	1	3	24	40.4537	0.012	0.0005
ENSMUSG00000020358	Hnrnpab	0.98	80	73	74	73	39	67.8	16.3615	815	12.0206
ENSMUSG00000020444	Guk1	0.98	93	30	61	25	21	46	30.6431	135	2.93478
ENSMUSG00000020657	Dnajc27	0.98	100	10	4	0.6	41	31.12	41.6986	0.193	0.0062018
ENSMUSG00000020936	Nmt1	0.98	107	33	26	30	21	43.4	35.8371	178	4.10138
ENSMUSG00000021091	Serpina3n	0.98	44	18	2	833	8	181	364.833	89.9	0.496685
ENSMUSG00000021224	Numb	0.98	42	23	21	20	6	22.4	12.8569	14	0.625
ENSMUSG00000021282	Eif5	0.98	85	66	51	72	37	62.2	18.6467	266	4.27653
ENSMUSG00000021484	Lman2	0.98	86	72	111	189	40	99.6	56.1721	64.3	0.645582
ENSMUSG00000021922	Itih4	0.98	1	13	10	2099	1	424.8	935.922	254	0.597928
ENSMUSG00000021990	Spata13	0.98	9	9	12	11	1	8.4	4.3359	0.206	0.0245238
ENSMUSG00000022091	Sorbs3	0.98	78	70	56	39	56	59.8	14.9733	1.05	0.0175585
ENSMUSG00000022191	Drosha	0.98	76	34	20	5	21	31.2	27.0684	0.626	0.0200641
ENSMUSG00000022201	Zfr	0.98	84	24	9	12	8	27.4	32.2769	35.4	1.29197
ENSMUSG00000022377	Asap1	0.98	58	10	7	5	3	16.6	23.2873	4.5	0.271084
ENSMUSG00000022884	Eif4a2	0.98	140	77	58	43	70	77.6	37.1927	360	4.63918
ENSMUSG00000022905	Kpna1	0.98	33	33	4	13	28	22.2	13.0652	105	4.72973
ENSMUSG00000022948	Setd4	0.98	5	1	3	3	2	2.8	1.48324	0.014	0.005
ENSMUSG00000022961	Son	0.98	43	42	14	18	19	27.2	14.0961	22.1	0.8125
ENSMUSG00000022965	Ifngr2	0.98	47	133	15	17	34	49.2	48.6436	0.048	0.00097561
ENSMUSG00000023004	Tuba1b	0.98	454	75	102	28	20	135.8	181.053	411	3.02651
ENSMUSG00000023206	Il15ra	0.98	4	11	9	12	6	8.4	3.36155	0.252	0.03
ENSMUSG00000023367	Tmem176a	0.98	31	21	1245	280	7	316.8	531.052	0.29	0.000915404
ENSMUSG00000023495	Pcbp4	0.98	165	32	38	8	23	53.2	63.5114	0.629	0.0118233
ENSMUSG00000023953	Polh	0.98	6	7	5	3	7	5.6	1.67332	0.165	0.0294643
ENSMUSG00000024002	Brd4	0.98	55	26	23	20	11	27	16.6283	19.8	0.733333
ENSMUSG00000024006	Stk38	0.98	15	15	13	14	7	12.8	3.34664	10.7	0.835938
ENSMUSG00000024055	Cyp4f13	0.98	8	5	36	54	6	21.8	22.1405	0.77	0.0353211
ENSMUSG00000024217	Snrpc	0.98	7	5	10	4	6	6.4	2.30217	30.1	4.70312
ENSMUSG00000024238	Zeb1	0.98	23	13	1	3	10	10	8.77496	0.36	0.036
ENSMUSG00000024601	Isoc1	0.98	22	47	31	48	9	31.4	16.6523	9.54	0.303822
ENSMUSG00000024787	Snx15	0.98	52	14	25	15	9	23	17.2192	0.511	0.0222174
ENSMUSG00000024824	Rad9a	0.98	18	9	21	6	6	12	7.03562	0.546	0.0455
ENSMUSG00000024851	Pitpnm1	0.98	227	14	14	3	2	52	97.9974	1.12	0.0215385
ENSMUSG00000025068	Gsto1	0.98	36	92	59	87	19	58.6	31.6275	157	2.67918
ENSMUSG00000025133	Ints4	0.98	29	33	25	13	12	22.4	9.47629	28.3	1.26339
ENSMUSG00000025140	Pycr1	0.98	4	2	0.9	0.1	3	2	1.56684	9.34	4.67
ENSMUSG00000025218	Poll	0.98	24	12	27	10	17	18	7.38241	0.459	0.0255
ENSMUSG00000025393	Atp5b	0.98	808	2473	1405	679	895	1252	736.065	1284	1.02556
ENSMUSG00000025580	Eif4a3	0.98	65	44	52	54	18	46.6	17.6579	157	3.3691
ENSMUSG00000025856	Pdgfa	0.98	44	16	12	4	9	17	15.7162	1.4	0.0823529
ENSMUSG00000026028	Trak2	0.98	68	98	23	7	31	45.4	36.95	0.138	0.00303965
ENSMUSG00000026096	Osgepl1	0.98	3	9	4	3	4	4.6	2.50998	1.12	0.243478
ENSMUSG00000026172	Bcs1l	0.98	26	23	22	15	15	20.2	4.96991	5.08	0.251485
ENSMUSG00000026235	Epha4	0.98	51	26	0.8	0.2	0.4	15.68	22.6303	1.19	0.0758929
ENSMUSG00000026269	Rnpepl1	0.98	23	36	49	30	18	31.2	12.0706	0.035	0.00112179
ENSMUSG00000026275	Ppp1r7	0.98	27	6	5	4	5	9.4	9.86408	174	18.5106
ENSMUSG00000026383	Epb41l5	0.98	2	2	6	5	0.3	3.06	2.35966	1.47	0.480392
ENSMUSG00000026436	Elk4	0.98	14	20	12	16	20	16.4	3.57771	0.132	0.00804878
ENSMUSG00000026502	Desi2	0.98	6	7	2	6	9	6	2.54951	1.86	0.31
ENSMUSG00000026502	Desi2	0.98	6	7	2	6	9	6	2.54951	1.8	0.3
ENSMUSG00000026837	Col5a1	0.98	10	35	11	3	15	14.8	12.0913	5.43	0.366892
ENSMUSG00000027322	Siglec1	0.98	0.5	3	0.7	6	1	2.24	2.32659	0.668	0.298214
ENSMUSG00000027406	Idh3b	0.98	133	269	213	73	138	165.2	76.3819	75	0.453995
ENSMUSG00000027612	Mmp24	0.98	65	0.1	0.2	0.2	0.1	13.12	29.0018	0.107	0.00815549
ENSMUSG00000027641	Rbl1	0.98	2	1	1	0.9	0.4	1.06	0.581378	0.1	0.0943396
ENSMUSG00000027652	Ralgapb	0.98	34	14	9	3	7	13.4	12.1778	8.29	0.618657
ENSMUSG00000028187	Rpf1	0.98	6	4	5	6	2	4.6	1.67332	6.55	1.42391
ENSMUSG00000028207	Asph	0.98	13	23	6	4	21	13.4	8.56154	29	2.16418
ENSMUSG00000028218	Fam92a	0.98	18	5	5	4	1	6.6	6.58027	0.03	0.00454545
ENSMUSG00000028412	Slc44a1	0.98	42	13	9	15	6	17	14.4049	6.07	0.357059
ENSMUSG00000028698	Pik3r3	0.98	34	6	4	1	3	9.6	13.7586	0.345	0.0359375
ENSMUSG00000028845	Tekt2	0.98	3	1	3	0.1	0.6	1.54	1.3704	0.744	0.483117
ENSMUSG00000028973	Abcb8	0.98	49	58	40	23	18	37.6	16.9499	3.44	0.0914894
ENSMUSG00000029106	Add1	0.98	268	79	59	19	21	89.2	103.156	68.2	0.764574
ENSMUSG00000029381	Shroom3	0.98	6	40	17	6	0.4	13.88	15.7947	2.52	0.181556
ENSMUSG00000029650	Slc46a3	0.98	7	12	29	59	7	22.8	22.163	0.015	0.000657895
ENSMUSG00000030254	Rad18	0.98	2	0.4	0.8	0.4	0.3	0.78	0.70852	0.635	0.814103
ENSMUSG00000030330	Ing4	0.98	13	7	15	6	7	9.6	4.09878	2.44	0.254167
ENSMUSG00000030533	Unc45a	0.98	47	14	37	16	7	24.2	16.9617	16	0.661157
ENSMUSG00000030839	Sergef	0.98	19	1	10	2	1	6.6	7.89303	0.278	0.0421212
ENSMUSG00000031631	Cfap97	0.98	12	7	6	5	4	6.8	3.11448	0.92	0.135294
ENSMUSG00000031700	Gpt2	0.98	47	20	25	163	102	71.4	60.6572	9.47	0.132633
ENSMUSG00000032340	Neo1	0.98	47	43	13	7	13	24.6	18.8361	2.11	0.0857724
ENSMUSG00000032481	Smarcc1	0.98	30	13	10	7	7	13.4	9.60729	139	10.3731
ENSMUSG00000032492	Pth1r	0.98	12	6	585	8	3	122.8	258.398	0.006	4.88599e-05
ENSMUSG00000032531	Amotl2	0.98	19	34	34	9	7	20.6	13.0499	3.08	0.149515
ENSMUSG00000033253	Szt2	0.98	23	10	9	8	5	11	6.96419	0.294	0.0267273
ENSMUSG00000033276	Stk36	0.98	6	0.4	2	0.6	0.3	1.86	2.41413	0.179	0.0962366
ENSMUSG00000033308	Dpyd	0.98	1	3	8	87	0.5	19.9	37.6271	3.33	0.167337
ENSMUSG00000033576	Apol6	0.98	0.2	2	0.7	0.1	10	2.6	4.20535	0.122	0.0469231
ENSMUSG00000033653	Vps8	0.98	22	11	12	3	2	10	8.09321	7.19	0.719
ENSMUSG00000033735	Spr	0.98	124	104	248	245	76	159.4	81.3253	151	0.947302
ENSMUSG00000033987	Dnah17	0.98	0.6	0.3	0.5	0.2	0.3	0.38	0.164317	0.214	0.563158
ENSMUSG00000034748	Sirt6	0.98	33	9	13	4	4	12.6	12.0125	25.1	1.99206
ENSMUSG00000034949	Zfr2	0.98	36	1	2	0.4	1	8.08	15.6183	0.574	0.0710396
ENSMUSG00000035121	Neil2	0.98	3	1	6	0.4	0.3	2.14	2.4162	0.099	0.0462617
ENSMUSG00000035126	Wdr78	0.98	4	0.3	2	0.2	0.1	1.32	1.69027	0.409	0.309848
ENSMUSG00000035559	Mpv17l2	0.98	107	33	98	42	21	60.2	39.455	0.815	0.0135382
ENSMUSG00000035673	Sbno2	0.98	21	17	23	21	8	18	6	0.251	0.0139444
ENSMUSG00000035722	Abca7	0.98	29	12	14	5	8	13.6	9.28978	0.085	0.00625
ENSMUSG00000035829	Ppp1r26	0.98	20	2	2	0.2	1	5.04	8.3969	0.821	0.162897
ENSMUSG00000036411	9530077C05Rik	0.98	9	0.4	2	0.2	0.3	2.38	3.77386	0.348	0.146218
ENSMUSG00000036446	Lum	0.98	2	30	2	4	10	9.6	11.8659	160	16.6667
ENSMUSG00000036833	Pnpla7	0.98	12	11	14	35	18	18	9.87421	0.183	0.0101667
ENSMUSG00000037216	Lipt1	0.98	5	7	5	6	3	5.2	1.48324	0.959	0.184423
ENSMUSG00000037253	Mex3c	0.98	23	12	6	7	4	10.4	7.63544	43.1	4.14423
ENSMUSG00000037270	4932438A13Rik	0.98	8	5	3	4	2	4.4	2.30217	0.074	0.0168182
ENSMUSG00000037470	Uggt1	0.98	18	14	9	23	10	14.8	5.80517	79.9	5.39865
ENSMUSG00000037503	Fam168b	0.98	188	38	35	25	15	60.2	72.0118	1.24	0.020598
ENSMUSG00000037876	Jmjd1c	0.98	10	8	3	5	3	5.8	3.11448	0.566	0.0975862
ENSMUSG00000037960	Card19	0.98	28	123	69	22	100	68.4	44.0602	2.44	0.0356725
ENSMUSG00000038023	Atp6v0a2	0.98	41	31	22	15	11	24	12.1655	1.03	0.0429167
ENSMUSG00000038248	Sobp	0.98	61	16	0.3	0.1	16	18.68	24.9419	0.762	0.0407923
ENSMUSG00000038252	Ncapd2	0.98	19	14	6	3	4	9.2	6.97854	1.93	0.209783
ENSMUSG00000038637	Lrrc56	0.98	4	2	7	2	0.7	3.14	2.45927	0.517	0.16465
ENSMUSG00000038855	Itpkb	0.98	33	34	14	3	8	18.4	14.3283	0.927	0.0503804
ENSMUSG00000039007	Cpq	0.98	10	29	54	48	8	29.8	21.1234	24.8	0.832215
ENSMUSG00000039208	Metrnl	0.98	17	16	28	4	8	14.6	9.26283	2.05	0.140411
ENSMUSG00000039244	E130309D02Rik	0.98	26	12	14	14	7	14.6	6.9857	0.851	0.0582877
ENSMUSG00000039483	Asb6	0.98	41	6	11	7	4	13.8	15.4175	0.199	0.0144203
ENSMUSG00000039686	Zer1	0.98	124	20	16	9	12	36.2	49.2565	0.087	0.00240331
ENSMUSG00000039741	Bahcc1	0.98	12	6	9	3	2	6.4	4.15933	0.01	0.0015625
ENSMUSG00000039813	Tbc1d2	0.98	5	1	4	1	0.5	2.3	2.04939	0.307	0.133478
ENSMUSG00000040034	Nup43	0.98	2	2	5	2	2	2.6	1.34164	6.31	2.42692
ENSMUSG00000040363	Bcor	0.98	17	17	4	7	6	10.2	6.30079	0.69	0.0676471
ENSMUSG00000040424	Hipk4	0.98	84	1	0.5	0.1	4	17.92	36.9717	0.091	0.00507813
ENSMUSG00000040605	Bace2	0.98	3	7	3	4	0.8	3.56	2.25122	0.324	0.0910112
ENSMUSG00000040658	Dnph1	0.98	6	2	39	17	6	14	15.0499	3.34	0.238571
ENSMUSG00000040990	Sh3kbp1	0.98	13	36	2	0.5	3	10.9	14.8678	9.14	0.838532
ENSMUSG00000041153	Osgin2	0.98	4	2	2	0.4	1	1.88	1.36821	1.01	0.537234
ENSMUSG00000041623	D11Wsu47e	0.98	10	5	7	3	3	5.6	2.96648	0.467	0.0833929
ENSMUSG00000041815	Poldip3	0.98	76	17	26	27	9	31	26.2011	75.7	2.44194
ENSMUSG00000042502	Cd2bp2	0.98	73	25	37	18	17	34	23.2164	169	4.97059
ENSMUSG00000042804	Gpr153	0.98	39	17	6	0.5	3	13.1	15.7892	0.009	0.000687023
ENSMUSG00000043061	Tmem18	0.98	24	9	10	8	4	11	7.61577	0.408	0.0370909
ENSMUSG00000043091	Tuba1c	0.98	2	10	45	65	2	24.8	28.6479	348	14.0323
ENSMUSG00000043629	1700019D03Rik	0.98	7	0.5	0.9	0.1	0.6	1.82	2.90981	2.64	1.45055
ENSMUSG00000044533	Rps2	0.98	199	235	779	311	314	367.6	235.231	135	0.367247
ENSMUSG00000044950	Pwwp2a	0.98	11	5	5	2	1	4.8	3.89872	0.045	0.009375
ENSMUSG00000045954	Cavin2	0.98	13	95	17	5	14	28.8	37.272	20.4	0.708333
ENSMUSG00000046269	Usp27x	0.98	11	0.5	2	0.1	0.3	2.78	4.65586	0.025	0.00899281
ENSMUSG00000046567	4930430F08Rik	0.98	8	1	3	2	2	3.2	2.77489	0.013	0.0040625
ENSMUSG00000046836	Brox	0.98	23	20	12	9	6	14	7.24569	60.5	4.32143
ENSMUSG00000046947	Adck2	0.98	27	8	14	8	3	12	9.24662	0.01	0.000833333
ENSMUSG00000047090	Tmem198b	0.98	14	5	7	3	2	6.2	4.76445	0.042	0.00677419
ENSMUSG00000047215	Rpl9	0.98	85	55	133	57	58	77.6	33.3287	933	12.0232
ENSMUSG00000047787	Flrt1	0.98	26	1	18	0.8	2	9.56	11.7119	0.397	0.0415272
ENSMUSG00000048096	Lmod1	0.98	3	4	3	0.7	5	3.14	1.59625	0.777	0.247452
ENSMUSG00000049588	Ccdc69	0.98	1	13	2	0.4	5	4.28	5.18575	0.162	0.0378505
ENSMUSG00000049606	Zfp644	0.98	6	3	1	2	2	2.8	1.92354	0.448	0.16
ENSMUSG00000049670	Morn4	0.98	122	2	10	0.5	3	27.5	52.9528	0.685	0.0249091
ENSMUSG00000050107	Haspin	0.98	0.2	0.2	2	0.1	0.3	0.56	0.808084	0.609	1.0875
ENSMUSG00000050373	Snx21	0.98	36	13	13	4	9	15	12.3085	0.315	0.021
ENSMUSG00000051306	Usp42	0.98	13	5	4	4	3	5.8	4.08656	0.151	0.0260345
ENSMUSG00000052026	Slc6a7	0.98	97	0.2	0.2	0.1	0.2	19.54	43.3015	0.78	0.0399181
ENSMUSG00000052560	Cpne8	0.98	10	3	6	3	1	4.6	3.50714	1.38	0.3
ENSMUSG00000053317	Sec61b	0.98	13	6	105	44	15	36.6	40.906	179	4.89071
ENSMUSG00000054263	Lifr	0.98	16	21	9	136	12	38.8	54.5225	62.4	1.60825
ENSMUSG00000055720	Ubl7	0.98	279	138	97	92	66	134.4	84.8487	173	1.2872
ENSMUSG00000056917	Sipa1	0.98	24	31	23	9	8	19	10.0747	0.897	0.0472105
ENSMUSG00000057113	Npm1	0.98	64	45	72	40	34	51	16.2481	975	19.1176
ENSMUSG00000057182	Scn3a	0.98	7	0.3	0.1	0.1	0.1	1.52	3.06464	0.646	0.425
ENSMUSG00000057367	Birc2	0.98	11	10	9	6	6	8.4	2.30217	0.161	0.0191667
ENSMUSG00000057367	Birc2	0.98	11	10	9	6	6	8.4	2.30217	1.55	0.184524
ENSMUSG00000057522	Spop	0.98	162	130	70	68	145	115	43.4971	2.58	0.0224348
ENSMUSG00000057842	Zfp595	0.98	0.5	0.7	0.6	1	0.3	0.62	0.258844	0.095	0.153226
ENSMUSG00000058594	Fbxo18	0.98	33	28	22	10	10	20.6	10.4307	0.255	0.0123786
ENSMUSG00000058914	C1qtnf3	0.98	0.3	0.1	29	0.1	0.9	6.08	12.8169	2.81	0.462171
ENSMUSG00000060802	B2m	0.98	142	381	327	2530	103	696.6	1031.69	109	0.156474
ENSMUSG00000062300	Nectin2	0.98	9	21	25	48	2	21	17.6777	0.868	0.0413333
ENSMUSG00000062456	Rpl9-ps6	0.98	14	5	12	6	4	8.2	4.49444	164	20
ENSMUSG00000062949	Atp11c	0.98	4	3	0.9	40	0.6	9.7	16.9979	8.21	0.846392
ENSMUSG00000063179	Pstk	0.98	7	7	8	2	8	6.4	2.50998	0.182	0.0284375
ENSMUSG00000063904	Dpp3	0.98	63	25	80	85	17	54	31.3369	135	2.5
ENSMUSG00000063931	Pepd	0.98	28	15	251	33	17	68.8	102.128	39.3	0.571221
ENSMUSG00000066306	Numa1	0.98	83	56	70	23	24	51.2	27.0315	19.9	0.388672
ENSMUSG00000068036	Afdn	0.98	21	19	12	9	6	13.4	6.42651	5.76	0.429851
ENSMUSG00000068860	Gm128	0.98	0.7	0.3	2	0.1	0.1	0.64	0.798749	0.657	1.02656
ENSMUSG00000073481	Marc2	0.98	13	7	65	78	10	34.6	34.0632	89.9	2.59827
ENSMUSG00000074874	Ctla2b	0.98	4	8	3	2	2	3.8	2.48998	0.627	0.165
ENSMUSG00000075543	Urad	0.98	1	0.5	2	135	0.2	27.74	59.9641	1.88	0.0677722
ENSMUSG00000078570	1110065P20Rik	0.98	21	1	8	4	4	7.6	7.89303	0.072	0.00947368
ENSMUSG00000078676	Casc3	0.98	57	23	18	14	11	24.6	18.6628	51.1	2.07724
ENSMUSG00000079084	Ccdc82	0.98	10	5	0.8	0.7	1	3.5	4.05832	0.005	0.00142857
ENSMUSG00000094441	Zfp955a	0.98	1	4	3	0.5	0.5	1.8	1.60468	0	0
ENSMUSG00000095115	Itpripl2	0.98	5	17	5	2	4	6.6	5.94138	0.034	0.00515152
ENSMUSG00000096433	Zfp994	0.98	3	2	0.7	2	1	1.74	0.915423	0.141	0.0810345
ENSMUSG00000000131	Xpo6	0.97	45	14	14	14	8	19	14.7648	20.1	1.05789
ENSMUSG00000001056	Nhp2	0.97	37	10	78	27	18	34	26.5801	239	7.02941
ENSMUSG00000001739	Cldn15	0.97	0.6	15	18	1	2	7.32	8.46239	0.349	0.0476776
ENSMUSG00000002028	Kmt2a	0.97	30	14	6	3	7	12	10.8397	2.13	0.1775
ENSMUSG00000002147	Stat6	0.97	12	44	52	45	17	34	18.1521	0.583	0.0171471
ENSMUSG00000002279	Lmf1	0.97	6	7	8	10	2	6.6	2.96648	1.86	0.281818
ENSMUSG00000002325	Irf9	0.97	8	9	6	19	4	9.2	5.80517	0.654	0.071087
ENSMUSG00000002731	Prkra	0.97	14	8	12	10	2	9.2	4.60435	18.2	1.97826
ENSMUSG00000003527	Ess2	0.97	33	10	12	6	6	13.4	11.2606	0.328	0.0244776
ENSMUSG00000003623	Crot	0.97	8	9	62	153	8	48	63.1308	89.5	1.86458
ENSMUSG00000004677	Myo9b	0.97	36	17	13	14	6	17.2	11.2561	11.5	0.668605
ENSMUSG00000004748	Mtfp1	0.97	87	104	26	21	33	54.2	38.4148	15.3	0.282288
ENSMUSG00000004843	Chmp2b	0.97	53	33	25	17	12	28	16.0935	8.14	0.290714
ENSMUSG00000006021	Kptn	0.97	18	9	10	10	7	10.8	4.20714	35	3.24074
ENSMUSG00000007815	Rhoa	0.97	45	63	56	37	18	43.8	17.5414	515	11.758
ENSMUSG00000008763	Man1a2	0.97	35	9	10	9	3	13.2	12.498	1.38	0.104545
ENSMUSG00000009470	Tnpo1	0.97	17	24	11	15	6	14.6	6.73053	183	12.5342
ENSMUSG00000013089	Etv5	0.97	129	15	14	6	6	34	53.2776	0.427	0.0125588
ENSMUSG00000013495	Tmem175	0.97	20	5	12	4	2	8.6	7.4027	0.423	0.049186
ENSMUSG00000014294	Ndufa2	0.97	211	195	982	143	329	372	347.721	100	0.268817
ENSMUSG00000014668	Chfr	0.97	22	8	8	9	7	10.8	6.30079	0.352	0.0325926
ENSMUSG00000015222	Map2	0.97	132	0.5	0.3	0.1	0.1	26.6	58.9206	69	2.59398
ENSMUSG00000015340	Cybb	0.97	0.1	4	0.9	4	0.9	1.98	1.8727	5.65	2.85354
ENSMUSG00000015363	Trabd	0.97	15	22	35	53	13	27.6	16.6072	4.52	0.163768
ENSMUSG00000015966	Il17rb	0.97	1	0.4	4	5	0.3	2.14	2.19955	0.007	0.00327103
ENSMUSG00000017221	Psmd3	0.97	129	82	120	82	53	93.2	31.0918	138	1.48069
ENSMUSG00000017404	Rpl19	0.97	189	94	459	160	138	208	144.535	1146	5.50962
ENSMUSG00000017421	Zfp207	0.97	29	23	16	18	9	19	7.51665	7.48	0.393684
ENSMUSG00000017747	Ghdc	0.97	17	14	44	18	5	19.6	14.5705	0.267	0.0136224
ENSMUSG00000017765	Slc12a4	0.97	32	51	18	16	7	24.8	17.1668	1.25	0.0504032
ENSMUSG00000018040	Rrp7a	0.97	64	9	29	9	10	24.2	23.8265	166	6.8595
ENSMUSG00000018604	Tbx3	0.97	3	10	7	13	2	7	4.63681	0.769	0.109857
ENSMUSG00000019838	Slc16a10	0.97	2	15	16	49	17	19.8	17.427	2.16	0.109091
ENSMUSG00000020063	Sirt1	0.97	7	5	3	3	2	4	2	79.5	19.875
ENSMUSG00000020424	Castor1	0.97	13	8	19	0.8	3	8.76	7.41539	103	11.758
ENSMUSG00000020464	Pnpt1	0.97	11	13	10	10	3	9.4	3.78153	19.1	2.03191
ENSMUSG00000020664	Dld	0.97	95	287	105	84	90	132.2	86.8775	215	1.62632
ENSMUSG00000020736	Nt5c	0.97	50	7	24	24	4	21.8	18.3085	54.4	2.49541
ENSMUSG00000020865	Abcc3	0.97	3	1	24	113	0.4	28.28	48.3642	0.326	0.0115276
ENSMUSG00000020929	Eftud2	0.97	48	14	17	11	6	19.2	16.6042	172	8.95833
ENSMUSG00000021218	Gdi2	0.97	162	104	123	159	38	117.2	50.5836	478	4.0785
ENSMUSG00000021687	Scamp1	0.97	99	16	13	17	6	30.2	38.7001	15	0.496689
ENSMUSG00000022016	Akap11	0.97	56	12	6	8	4	17.2	21.8906	0.261	0.0151744
ENSMUSG00000023007	Prpf40b	0.97	57	13	20	6	9	21	20.7966	6.25	0.297619
ENSMUSG00000023467	Tulp2	0.97	0.4	0.1	0.4	0.5	0.3	0.34	0.151658	0.186	0.547059
ENSMUSG00000023861	Mpc1	0.97	35	98	141	42	69	77	43.5603	57.1	0.741558
ENSMUSG00000023886	Smoc2	0.97	11	50	23	2	36	24.4	19.1911	0.504	0.0206557
ENSMUSG00000023919	Cenpq	0.97	2	3	2	1	0.9	1.78	0.861394	0.343	0.192697
ENSMUSG00000023921	Mut	0.97	19	63	63	73	15	46.6	27.3642	27.2	0.583691
ENSMUSG00000023960	Enpp5	0.97	114	8	45	9	4	36	46.6423	0.521	0.0144722
ENSMUSG00000024014	Pim1	0.97	16	34	7	16	25	19.6	10.2616	0.003	0.000153061
ENSMUSG00000024158	Hagh	0.97	71	35	237	205	28	115.2	98.6012	126	1.09375
ENSMUSG00000024387	Csnk2b	0.97	114	87	101	65	53	84	25.0998	546	6.5
ENSMUSG00000024411	Aqp4	0.97	62	4	10	0.4	6	16.48	25.6817	10.6	0.643204
ENSMUSG00000024430	Cabyr	0.97	10	0.9	2	7	0.9	4.16	4.12589	1.06	0.254808
ENSMUSG00000024527	Afg3l2	0.97	76	118	77	50	41	72.4	30.005	27.6	0.381215
ENSMUSG00000024533	Spire1	0.97	87	3	7	0.1	4	20.22	37.4125	0.741	0.0366469
ENSMUSG00000024927	Rela	0.97	64	66	55	100	18	60.6	29.3223	1.74	0.0287129
ENSMUSG00000024985	Tcf7l2	0.97	29	8	5	9	2	10.6	10.6442	0.801	0.075566
ENSMUSG00000025132	Arhgdia	0.97	665	223	420	138	84	306	237.841	867	2.83333
ENSMUSG00000025555	Farp1	0.97	64	9	23	17	2	23	24.259	2.17	0.0943478
ENSMUSG00000025645	Ccdc51	0.97	8	7	20	10	4	9.8	6.09918	6.59	0.672449
ENSMUSG00000025759	Mfsd8	0.97	9	12	3	7	6	7.4	3.36155	0.019	0.00256757
ENSMUSG00000025812	Pard3	0.97	6	8	7	13	4	7.6	3.36155	7.87	1.03553
ENSMUSG00000025921	Rdh10	0.97	8	4	24	13	0.9	9.98	9.05273	0.593	0.0594188
ENSMUSG00000025949	Pikfyve	0.97	6	2	2	3	1	2.8	1.92354	0.203	0.0725
ENSMUSG00000026204	Ptprn	0.97	802	2	1	0.1	0.5	161.12	358.264	0.605	0.00375497
ENSMUSG00000026259	Ngef	0.97	353	0.8	41	17	0.2	82.4	152.177	0.545	0.00661408
ENSMUSG00000026576	Atp1b1	0.97	1061	235	912	34	36	455.6	494.289	94.3	0.20698
ENSMUSG00000026827	Gpd2	0.97	45	10	11	13	67	29.2	25.6944	34.6	1.18493
ENSMUSG00000027247	Arhgap1	0.97	64	26	44	10	4	29.6	24.7144	123	4.15541
ENSMUSG00000027259	Adal	0.97	6	4	4	4	4	4.4	0.894427	0.941	0.213864
ENSMUSG00000027394	Ttl	0.97	41	12	5	2	5	13	16.0779	0.061	0.00469231
ENSMUSG00000028011	Tdo2	0.97	0.9	0.8	4	429	0.7	87.08	191.144	6.62	0.076022
ENSMUSG00000028126	Pip5k1a	0.97	45	13	9	8	14	17.8	15.4175	1.44	0.0808989
ENSMUSG00000028224	Nbn	0.97	14	17	7	10	6	10.8	4.65833	6.08	0.562963
ENSMUSG00000028232	Tmem68	0.97	11	3	4	4	2	4.8	3.56371	0.418	0.0870833
ENSMUSG00000028344	Invs	0.97	3	1	2	3	0.6	1.92	1.10995	1.55	0.807292
ENSMUSG00000028393	Alad	0.97	41	51	124	180	16	82.4	67.7591	59.3	0.71966
ENSMUSG00000028453	Fancg	0.97	10	3	4	2	0.8	3.96	3.57883	0.015	0.00378788
ENSMUSG00000028555	Ttc39a	0.97	3	0.9	1	0.8	0.3	1.2	1.04163	0.074	0.0616667
ENSMUSG00000029406	Pitpnm2	0.97	102	23	9	9	9	30.4	40.4821	0.361	0.011875
ENSMUSG00000029502	Golga3	0.97	15	14	6	5	10	10	4.52769	14.7	1.47
ENSMUSG00000029701	Rbm28	0.97	29	15	11	11	10	15.2	7.94984	37	2.43421
ENSMUSG00000030007	Cct7	0.97	194	101	135	89	77	119.2	47.0872	615	5.1594
ENSMUSG00000030286	Emc3	0.97	67	40	48	35	36	45.2	13.2174	9.75	0.215708
ENSMUSG00000030707	Coro1a	0.97	106	9	16	4	3	27.6	44.1282	84.1	3.0471
ENSMUSG00000030730	Atp2a1	0.97	2	7	3	16	19288	3863.2	8622.73	27.3	0.00706668
ENSMUSG00000030990	Pgap2	0.97	10	34	8	15	7	14.8	11.1669	0.471	0.0318243
ENSMUSG00000031111	Igsf1	0.97	12	9	0.1	0.1	0.4	4.32	5.74169	0.002	0.000462963
ENSMUSG00000031349	Nsdhl	0.97	29	5	34	67	3	27.6	26.0346	18.8	0.681159
ENSMUSG00000031461	Myom2	0.97	0.1	354	5	0.3	502	172.28	239.24	6.92	0.0401672
ENSMUSG00000031505	Naxd	0.97	33	17	37	33	13	26.6	10.8074	48.6	1.82707
ENSMUSG00000031696	Vps35	0.97	77	45	34	38	18	42.4	21.7325	111	2.61792
ENSMUSG00000031834	Pik3r2	0.97	153	17	33	18	12	46.6	59.9942	0.835	0.0179185
ENSMUSG00000031904	Slc7a6	0.97	17	10	7	0.2	6	8.04	6.14068	0.163	0.0202736
ENSMUSG00000031910	Has3	0.97	2	2	0.7	0.2	1	1.18	0.801249	0.323	0.273729
ENSMUSG00000031967	Afg3l1	0.97	26	37	35	40	26	32.8	6.45755	2.28	0.0695122
ENSMUSG00000032060	Cryab	0.97	238	1385	257	4	471	471	537.022	89.9	0.19087
ENSMUSG00000032109	Nlrx1	0.97	12	20	17	9	12	14	4.41588	4.41	0.315
ENSMUSG00000032115	Hyou1	0.97	96	46	51	195	13	80.2	70.652	182	2.26933
ENSMUSG00000032252	Glce	0.97	11	4	2	7	1	5	4.06202	0.614	0.1228
ENSMUSG00000032279	Idh3a	0.97	226	589	118	31	266	246	212.755	470	1.91057
ENSMUSG00000032754	Slc8b1	0.97	14	9	15	33	7	15.6	10.2859	0.372	0.0238462
ENSMUSG00000032840	2410131K14Rik	0.97	20	12	8	3	7	10	6.44205	0.011	0.0011
ENSMUSG00000033166	Dis3	0.97	8	7	2	4	3	4.8	2.58844	40.8	8.5
ENSMUSG00000033295	Ptprf	0.97	64	8	75	88	1	47.2	39.9712	1.73	0.0366525
ENSMUSG00000033405	Nudt15	0.97	6	5	1	1	3	3.2	2.28035	95.5	29.8438
ENSMUSG00000033594	Spata2l	0.97	112	7	16	29	2	33.2	45.2294	0.861	0.0259337
ENSMUSG00000033860	Fgg	0.97	4	13	28	5123	5	1034.6	2285.51	647	0.625362
ENSMUSG00000034126	Pomt2	0.97	19	11	14	15	5	12.8	5.21536	0.076	0.0059375
ENSMUSG00000034382	AI661453	0.97	1	1	29	25	0.5	11.3	14.4031	0.116	0.0102655
ENSMUSG00000034403	Pja1	0.97	179	18	37	36	10	56	69.7316	0.464	0.00828571
ENSMUSG00000034473	Sec22a	0.97	4	3	9	3	2	4.2	2.77489	0.59	0.140476
ENSMUSG00000034687	Fras1	0.97	6	1	3	0.9	0.5	2.28	2.29499	0.21	0.0921053
ENSMUSG00000034731	Dgkh	0.97	7	2	4	0.3	0.8	2.82	2.73715	0.095	0.0336879
ENSMUSG00000034902	Pip5k1c	0.97	407	28	54	18	16	104.6	169.723	4.78	0.0456979
ENSMUSG00000035105	Egln3	0.97	15	125	12	18	23	38.6	48.4696	0.249	0.00645078
ENSMUSG00000035199	Arl6ip5	0.97	250	154	74	55	108	128.2	77.7895	78.5	0.612324
ENSMUSG00000035262	Amh	0.97	2	0.3	0.6	0.5	0.7	0.82	0.676018	0.163	0.19878
ENSMUSG00000035437	Rabgap1	0.97	30	12	8	5	8	12.6	10.0399	37.6	2.98413
ENSMUSG00000035569	Ankrd11	0.97	64	29	13	12	15	26.6	22.0068	0.793	0.029812
ENSMUSG00000035901	Dennd5a	0.97	154	51	16	11	11	48.6	61.2479	0.089	0.00183128
ENSMUSG00000035929	H2-Q4	0.97	7	30	36	33	9	23	13.8744	13.6	0.591304
ENSMUSG00000037262	Kin	0.97	12	10	9	11	4	9.2	3.11448	1.44	0.156522
ENSMUSG00000037416	Dmxl1	0.97	6	5	2	2	1	3.2	2.16795	3.59	1.12187
ENSMUSG00000037475	Thoc2	0.97	6	5	3	3	2	3.8	1.64317	33.7	8.86842
ENSMUSG00000037926	Ssh2	0.97	8	20	2	3	8	8.2	7.15542	1.5	0.182927
ENSMUSG00000038151	Prdm1	0.97	0.3	2	1	0.3	0.3	0.78	0.746324	0.321	0.411538
ENSMUSG00000038346	Zfp384	0.97	23	15	18	11	8	15	5.87367	4.49	0.299333
ENSMUSG00000038664	Herc1	0.97	20	7	3	3	5	7.6	7.12741	0.338	0.0444737
ENSMUSG00000038759	Nup205	0.97	12	9	5	5	4	7	3.39116	2.85	0.407143
ENSMUSG00000040612	Ildr2	0.97	41	2	10	9	0.6	12.52	16.4515	0.266	0.021246
ENSMUSG00000041215	Yeats2	0.97	18	6	6	4	2	7.2	6.26099	0.244	0.0338889
ENSMUSG00000041396	Mettl18	0.97	4	2	8	2	2	3.6	2.60768	0.069	0.0191667
ENSMUSG00000041642	Kif21b	0.97	37	0.9	0.6	0.6	0.5	7.92	16.2569	0.394	0.0497475
ENSMUSG00000041733	Coq5	0.97	45	120	38	28	56	57.4	36.4527	5.84	0.101742
ENSMUSG00000041935	AW549877	0.97	25	17	11	10	4	13.4	7.95613	18.6	1.38806
ENSMUSG00000042165	Gm9774	0.97	4	2	3	3	2	2.8	0.83666	4.34	1.55
ENSMUSG00000042286	Stab1	0.97	9	32	7	12	8	13.6	10.4547	0.1	0.00735294
ENSMUSG00000042903	Foxo4	0.97	32	50	27	25	128	52.4	43.397	1.08	0.0206107
ENSMUSG00000043286	Pnpla1	0.97	0.6	0.1	4	3	0.1	1.56	1.81742	0.484	0.310256
ENSMUSG00000043687	1190005I06Rik	0.97	3	0.5	0.7	3	0.2	1.48	1.39893	0.092	0.0621622
ENSMUSG00000044308	Ubr3	0.97	51	63	12	22	46	38.8	21.1353	13.3	0.342784
ENSMUSG00000044447	Dock5	0.97	6	6	8	6	0.5	5.3	2.81957	12	2.26415
ENSMUSG00000044768	D1Ertd622e	0.97	2	0.2	0.9	0.4	0.7	0.84	0.70214	1.78	2.11905
ENSMUSG00000045136	Tubb2b	0.97	246	5	21	0.2	3	55.04	107.056	4348	78.9971
ENSMUSG00000045237	1110012L19Rik	0.97	9	7	19	10	14	11.8	4.76445	0.418	0.0354237
ENSMUSG00000045252	Zfp574	0.97	53	13	18	13	6	20.6	18.6091	0.399	0.0193689
ENSMUSG00000045664	Cdc42ep2	0.97	42	28	20	7	29	25.2	12.8725	0.45	0.0178571
ENSMUSG00000046573	Lyrm4	0.97	24	6	14	7	3	10.8	8.40833	20.1	1.86111
ENSMUSG00000046879	Irgm1	0.97	3	7	11	27	3	10.2	9.95992	13.8	1.35294
ENSMUSG00000047866	Lonp2	0.97	42	34	36	109	13	46.8	36.4513	15.2	0.324786
ENSMUSG00000047867	Gimap6	0.97	2	12	15	3	6	7.6	5.68331	0.304	0.04
ENSMUSG00000048878	Hexim1	0.97	55	15	43	23	12	29.6	18.6494	97.3	3.28716
ENSMUSG00000048920	Fkrp	0.97	56	43	24	10	34	33.4	17.6011	0.236	0.00706587
ENSMUSG00000049241	Hcar1	0.97	3	2	6	0.1	2	2.62	2.16148	0.284	0.108397
ENSMUSG00000049676	Catsperg1	0.97	0.5	0.3	0.2	0.1	0.2	0.26	0.151658	0.063	0.242308
ENSMUSG00000049687	Pheta2	0.97	0.4	0.7	0.5	0.1	0.5	0.44	0.219089	0.683	1.55227
ENSMUSG00000051007	Gatd1	0.97	31	7	27	11	4	16	12.2066	5.9	0.36875
ENSMUSG00000053329	D10Jhu81e	0.97	176	472	288	158	178	254.4	132.056	292	1.1478
ENSMUSG00000054808	Actn4	0.97	114	73	196	95	17	99	65.2878	446	4.50505
ENSMUSG00000055254	Ntrk2	0.97	158	0.8	0.4	0.2	1	32.08	70.3921	0.622	0.019389
ENSMUSG00000057606	Colq	0.97	3	14	0.1	0.2	5	4.46	5.71384	1.05	0.235426
ENSMUSG00000058291	Zfp68	0.97	6	5	3	3	3	4	1.41421	0.43	0.1075
ENSMUSG00000058571	Gpc6	0.97	6	6	2	0.4	0.7	3.02	2.78604	1.56	0.516556
ENSMUSG00000058600	Rpl30	0.97	45	29	100	44	61	55.8	27.179	728	13.0466
ENSMUSG00000058672	Tubb2a	0.97	888	49	97	251	15	260	362.484	3312	12.7385
ENSMUSG00000059146	Ntrk3	0.97	30	0.9	0.7	0.1	0.3	6.4	13.1966	0.097	0.0151562
ENSMUSG00000059208	Hnrnpm	0.97	61	39	46	29	27	40.4	13.8492	390	9.65347
ENSMUSG00000059434	Gckr	0.97	0.6	0.2	1	153	0.2	31	68.2009	3.09	0.0996774
ENSMUSG00000059878	Zfp422	0.97	19	15	14	10	3	12.2	6.05805	10	0.819672
ENSMUSG00000060121	Gemin2	0.97	7	4	5	7	3	5.2	1.78885	82	15.7692
ENSMUSG00000062563	Cys1	0.97	14	4	59	3	2	16.4	24.2961	0.39	0.0237805
ENSMUSG00000062931	Zfp938	0.97	13	3	2	3	2	4.6	4.72229	0.038	0.00826087
ENSMUSG00000062937	Mtap	0.97	5	18	10	11	6	10	5.14782	239	23.9
ENSMUSG00000068206	Pick1	0.97	24	8	15	5	10	12.4	7.4364	1.4	0.112903
ENSMUSG00000068877	Selenbp2	0.97	1	3	43	1093	3	228.6	483.536	46.7	0.204287
ENSMUSG00000071042	Rasgrp3	0.97	10	14	4	2	10	8	4.89898	0.174	0.02175
ENSMUSG00000071648	Rom1	0.97	16	17	15	6	11	13	4.52769	4.55	0.35
ENSMUSG00000071714	Csf2rb2	0.97	1	2	1	2	1	1.4	0.547723	0.381	0.272143
ENSMUSG00000072501	Phf20l1	0.97	9	15	3	6	5	7.6	4.66905	0.172	0.0226316
ENSMUSG00000073489	Ifi204	0.97	0.7	3	1	3	2	1.94	1.08074	1.67	0.860825
ENSMUSG00000075229	Ccdc58	0.97	8	15	29	29	8	17.8	10.616	303	17.0225
ENSMUSG00000075289	Carns1	0.97	14	26	3	1	11	11	9.97497	0	0
ENSMUSG00000075595	Zfp652	0.97	16	15	5	9	28	14.6	8.73499	0.456	0.0312329
ENSMUSG00000078578	Ube2d3	0.97	16	22	8	15	10	14.2	5.49545	31.9	2.24648
ENSMUSG00000078716	Tmem8b	0.97	69	26	4	1	13	22.6	27.7002	0.054	0.00238938
ENSMUSG00000084957	Bbip1	0.97	17	9	9	5	8	9.6	4.44972	0.027	0.0028125
ENSMUSG00000090110	Cmc4	0.97	7	5	4	3	2	4.2	1.92354	2.52	0.6
ENSMUSG00000090841	Myl6	0.97	654	207	2011	440	286	719.6	741.782	469	0.651751
ENSMUSG00000000142	Axin2	0.96	21	3	2	3	2	6.2	8.28855	0.002	0.000322581
ENSMUSG00000001416	Cct3	0.96	47	38	36	37	20	35.6	9.76217	125	3.51124
ENSMUSG00000001440	Kpnb1	0.96	84	60	31	45	26	49.2	23.5308	432	8.78049
ENSMUSG00000002052	Supt6	0.96	94	28	32	26	22	40.4	30.1795	38.1	0.943069
ENSMUSG00000003575	Crtc1	0.96	108	8	9	3	4	26.4	45.687	1.45	0.0549242
ENSMUSG00000005514	Por	0.96	134	49	260	326	14	156.6	133.988	144	0.91954
ENSMUSG00000005580	Adcy9	0.96	34	17	6	9	25	18.2	11.5195	0.314	0.0172527
ENSMUSG00000005683	Cs	0.96	339	1690	237	123	403	558.4	641.419	299	0.535458
ENSMUSG00000005699	Pard6a	0.96	60	7	11	4	6	17.6	23.839	2.41	0.136932
ENSMUSG00000005899	Smpd4	0.96	28	9	9	5	3	10.8	9.95992	4.55	0.421296
ENSMUSG00000005983	1700037C18Rik	0.96	2	1	7	0.8	2	2.56	2.54323	0	0
ENSMUSG00000006498	Ptbp1	0.96	36	29	101	52	8	45.2	34.9671	449	9.93363
ENSMUSG00000006740	Kif5b	0.96	63	39	10	11	14	27.4	23.2013	77	2.81022
ENSMUSG00000006818	Sod2	0.96	102	312	149	84	116	152.6	92.2323	399	2.61468
ENSMUSG00000007411	Mark3	0.96	63	32	42	26	27	38	15.346	3.05	0.0802632
ENSMUSG00000009585	Apobec3	0.96	3	6	4	2	2	3.4	1.67332	1.18	0.347059
ENSMUSG00000009995	Taz	0.96	18	18	21	10	16	16.6	4.09878	0.999	0.0601807
ENSMUSG00000013275	Slc41a1	0.96	84	78	18	5	28	42.6	36.0527	1.18	0.0276995
ENSMUSG00000015476	Prrt1	0.96	460	5	6	0.1	0.8	94.38	204.404	2.51	0.0265946
ENSMUSG00000018474	Chd3	0.96	285	12	142	45	5	97.8	118.067	3.12	0.0319018
ENSMUSG00000019088	Dnase1l1	0.96	1	9	9	3	60	16.4	24.6333	0	0
ENSMUSG00000019823	Mical1	0.96	5	4	2	0.6	2	2.72	1.75841	28.2	10.3676
ENSMUSG00000020099	Unc5b	0.96	50	20	9	2	2	16.6	20.0699	0.316	0.0190361
ENSMUSG00000020154	Ptprb	0.96	12	39	9	10	8	15.6	13.1643	0.377	0.0241667
ENSMUSG00000020305	Asb3	0.96	6	2	0.8	3	2	2.76	1.9718	0.819	0.296739
ENSMUSG00000020469	Myl7	0.96	0.5	903	5	1	0.1	181.92	403.101	2.38	0.0130827
ENSMUSG00000020538	Srebf1	0.96	61	32	46	193	25	71.4	69.3635	0.108	0.00151261
ENSMUSG00000020652	Cenpo	0.96	2	0.8	1	0.9	0.8	1.1	0.509902	0.616	0.56
ENSMUSG00000020661	Dnmt3a	0.96	20	14	5	3	14	11.2	7.04982	3.61	0.322321
ENSMUSG00000020700	Map3k3	0.96	21	29	18	9	14	18.2	7.52994	0.611	0.0335714
ENSMUSG00000021118	Plek2	0.96	1	0.2	4	1	0.1	1.26	1.58997	0.379	0.300794
ENSMUSG00000021186	Fbln5	0.96	5	11	45	1	2	12.8	18.4174	21	1.64062
ENSMUSG00000021298	Gpr132	0.96	0.4	2	1	0.6	0.4	0.88	0.672309	0.257	0.292045
ENSMUSG00000021392	Nol8	0.96	8	6	2	5	3	4.8	2.38747	1.38	0.2875
ENSMUSG00000021510	Zfp729a	0.96	2	2	0.7	1	0.8	1.3	0.648074	0.068	0.0523077
ENSMUSG00000021519	Mterf3	0.96	9	12	8	6	4	7.8	3.03315	0.217	0.0278205
ENSMUSG00000021779	Thrb	0.96	16	9	6	13	5	9.8	4.65833	0.001	0.000102041
ENSMUSG00000021884	Hacl1	0.96	3	3	36	170	1	42.6	72.7001	48.7	1.14319
ENSMUSG00000021904	Sema3g	0.96	8	16	40	0.2	6	14.04	15.5759	0.043	0.00306268
ENSMUSG00000022280	Rnf19a	0.96	21	10	13	11	9	12.8	4.81664	0.617	0.0482031
ENSMUSG00000022471	Xrcc6	0.96	6	9	9	7	7	7.6	1.34164	55	7.23684
ENSMUSG00000022752	Tomm70a	0.96	84	44	21	50	20	43.8	26.1763	32.7	0.746575
ENSMUSG00000022772	Senp5	0.96	16	5	1	6	4	6.4	5.68331	0.005	0.00078125
ENSMUSG00000022793	B4galt4	0.96	17	8	5	0.5	2	6.5	6.53835	0.198	0.0304615
ENSMUSG00000022843	Clcn2	0.96	44	2	15	18	2	16.2	17.1814	2.49	0.153704
ENSMUSG00000024012	Mtch1	0.96	665	129	208	79	51	226.4	252.333	12.3	0.0543286
ENSMUSG00000024174	Pot1b	0.96	4	4	4	2	2	3.2	1.09545	0.067	0.0209375
ENSMUSG00000024277	Mapre2	0.96	106	33	15	4	8	33.2	42.1865	17.3	0.521084
ENSMUSG00000024483	Ankhd1	0.96	17	17	12	8	8	12.4	4.50555	2.26	0.182258
ENSMUSG00000024603	Dctn4	0.96	78	42	21	17	14	34.4	26.7264	59.3	1.72384
ENSMUSG00000024610	Cd74	0.96	18	264	466	139	66	190.6	179.73	6.02	0.0315845
ENSMUSG00000024620	Pdgfrb	0.96	28	52	34	5	11	26	18.775	1.1	0.0423077
ENSMUSG00000024740	Ddb1	0.96	233	188	168	155	106	170	46.4166	168	0.988235
ENSMUSG00000024847	Aip	0.96	116	33	47	25	63	56.8	36.1137	46.5	0.818662
ENSMUSG00000025591	Tma16	0.96	5	3	3	2	4	3.4	1.14018	114	33.5294
ENSMUSG00000026480	Ncf2	0.96	1	2	2	0.8	0.7	1.3	0.648074	1.55	1.19231
ENSMUSG00000026504	Sdccag8	0.96	16	3	6	3	5	6.6	5.41295	0.252	0.0381818
ENSMUSG00000026544	Dusp23	0.96	15	24	29	23	53	28.8	14.4291	1.93	0.0670139
ENSMUSG00000026657	Frmd4a	0.96	9	4	1	0.6	0.3	2.98	3.67587	1.58	0.530201
ENSMUSG00000026825	Dnm1	0.96	1699	9	3	0.1	7	343.62	757.688	65.7	0.1912
ENSMUSG00000027423	Snx5	0.96	32	23	25	15	15	22	7.2111	113	5.13636
ENSMUSG00000027513	Pck1	0.96	0.4	26	1851	1205	23	621.08	858.884	12.5	0.0201262
ENSMUSG00000027827	Kcnab1	0.96	28	0.3	0.5	0.1	0.4	5.86	12.3775	3.16	0.539249
ENSMUSG00000028691	Prdx1	0.96	56	72	279	419	64	178	163.858	1370	7.69663
ENSMUSG00000028737	Aldh4a1	0.96	16	48	160	144	34	80.4	66.5793	139	1.72886
ENSMUSG00000028795	Ccdc28b	0.96	24	4	15	3	18	12.8	9.09395	0.283	0.0221094
ENSMUSG00000028840	Zfp593	0.96	4	0.5	2	1	1	1.7	1.39642	178	104.706
ENSMUSG00000028841	Cnksr1	0.96	0.9	6	15	0.5	40	12.48	16.4568	0.003	0.000240385
ENSMUSG00000029072	Tas1r3	0.96	0.9	0.7	1	0.7	2	1.06	0.541295	0.007	0.00660377
ENSMUSG00000029198	Grpel1	0.96	18	29	62	40	21	34	17.8185	235	6.91176
ENSMUSG00000029253	Cenpc1	0.96	8	3	4	1	0.7	3.34	2.94584	1.07	0.320359
ENSMUSG00000029270	Fam69a	0.96	13	2	7	4	7	6.6	4.15933	0.095	0.0143939
ENSMUSG00000029309	Sparcl1	0.96	2198	192	36	3	49	495.6	954.421	18.4	0.0371267
ENSMUSG00000030059	Tmf1	0.96	15	12	6	11	9	10.6	3.36155	0.426	0.0401887
ENSMUSG00000030770	Parva	0.96	28	18	24	23	4	19.4	9.31665	11.6	0.597938
ENSMUSG00000030930	Chst15	0.96	34	8	12	4	2	12	12.8841	0.341	0.0284167
ENSMUSG00000031311	Nono	0.96	82	39	49	46	17	46.6	23.4158	323	6.93133
ENSMUSG00000031486	Adgra2	0.96	15	14	18	3	3	10.6	7.09225	0.016	0.00150943
ENSMUSG00000032119	Hinfp	0.96	16	6	3	6	3	6.8	5.35724	0.791	0.116324
ENSMUSG00000032306	Mpi	0.96	48	96	30	9	30	42.6	32.8907	8.13	0.190845
ENSMUSG00000032469	Dbr1	0.96	7	4	6	5	3	5	1.58114	1.42	0.284
ENSMUSG00000032470	Mras	0.96	148	5	10	2	4	33.8	63.9077	1.22	0.0360947
ENSMUSG00000033004	Mycbp2	0.96	43	9	5	3	5	13	16.9115	2.74	0.210769
ENSMUSG00000033111	3830406C13Rik	0.96	16	9	14	8	4	10.2	4.81664	0.076	0.00745098
ENSMUSG00000033355	Rtp4	0.96	4	13	9	36	4	13.2	13.2929	0.003	0.000227273
ENSMUSG00000035878	Hykk	0.96	1	0.6	36	13	0.3	10.18	15.3971	1.08	0.10609
ENSMUSG00000035914	Cd276	0.96	21	7	0.6	7	2	7.52	8.07168	0.632	0.0840426
ENSMUSG00000036002	Fam214b	0.96	45	23	30	8	19	25	13.7295	0.014	0.00056
ENSMUSG00000036019	Tmtc2	0.96	7	2	0.2	2	0.2	2.28	2.78783	0.066	0.0289474
ENSMUSG00000036622	Atp13a2	0.96	170	12	20	13	15	46	69.3866	0.133	0.0028913
ENSMUSG00000036718	Micall2	0.96	5	3	6	2	0.6	3.32	2.19363	0.218	0.0656627
ENSMUSG00000037411	Serpine1	0.96	1	33	2	0.9	3	7.98	14.0126	3.24	0.406015
ENSMUSG00000038331	Satb2	0.96	22	0.4	4	0.3	0.2	5.38	9.42826	0.857	0.159294
ENSMUSG00000038542	Pcid2	0.96	47	17	18	15	10	21.4	14.639	2.61	0.121963
ENSMUSG00000039262	Prrc2b	0.96	180	74	32	19	43	69.6	64.9792	37.6	0.54023
ENSMUSG00000039450	Dcxr	0.96	20	13	470	187	7	139.4	199.578	12.9	0.0925395
ENSMUSG00000039976	Tbc1d16	0.96	45	52	20	9	19	29	18.4797	0.008	0.000275862
ENSMUSG00000040584	Abcb1a	0.96	18	7	4	1	2	6.4	6.8775	2.19	0.342187
ENSMUSG00000040865	Ino80d	0.96	7	6	3	2	3	4.2	2.16795	0.424	0.100952
ENSMUSG00000041120	Nbl1	0.96	140	39	37	2	30	49.6	52.6621	1.89	0.0381048
ENSMUSG00000041375	Ccdc9	0.96	36	13	24	10	13	19.2	10.8028	0.408	0.02125
ENSMUSG00000041598	Cdc42ep4	0.96	60	13	21	25	4	24.6	21.3612	2.59	0.105285
ENSMUSG00000041977	Arhgef11	0.96	48	16	13	11	7	19	16.5378	0.412	0.0216842
ENSMUSG00000042102	Dmgdh	0.96	0.2	0.8	62	357	0.3	84.06	154.89	54.3	0.645967
ENSMUSG00000042476	Abcb4	0.96	2	8	0.4	50	31	18.28	21.5544	0.582	0.0318381
ENSMUSG00000042672	Dcst1	0.96	3	0.3	3	0.2	0.3	1.36	1.49766	0.122	0.0897059
ENSMUSG00000042688	Mapk6	0.96	31	11	8	10	10	14	9.56556	0.722	0.0515714
ENSMUSG00000043004	Gng2	0.96	110	5	1	0.9	2	23.78	48.227	53.9	2.26661
ENSMUSG00000043154	Ppp2r3a	0.96	6	49	6	3	22	17.2	19.2795	0.132	0.00767442
ENSMUSG00000044700	Tmem201	0.96	58	53	10	8	15	28.8	24.5703	0.897	0.0311458
ENSMUSG00000045435	Tmem60	0.96	7	4	5	3	2	4.2	1.92354	0.605	0.144048
ENSMUSG00000046962	Zbtb21	0.96	11	5	4	8	3	6.2	3.27109	0.433	0.0698387
ENSMUSG00000047153	Khnyn	0.96	19	11	13	13	6	12.4	4.66905	0.136	0.0109677
ENSMUSG00000048047	Zbtb33	0.96	8	6	1	6	1	4.4	3.20936	0.689	0.156591
ENSMUSG00000049577	Zfpm1	0.96	61	32	6	55	3	31.4	26.857	0.968	0.030828
ENSMUSG00000049866	Arl4c	0.96	34	4	5	1	0.5	8.9	14.1616	1.51	0.169663
ENSMUSG00000050106	Tmc8	0.96	0.8	6	4	2	0.7	2.7	2.27376	0.566	0.20963
ENSMUSG00000050144	Slc25a44	0.96	119	18	28	78	20	52.6	44.4949	0.687	0.0130608
ENSMUSG00000050244	Heatr1	0.96	13	7	6	9	6	8.2	2.94958	1.77	0.215854
ENSMUSG00000050565	Tor1aip2	0.96	15	14	14	34	11	17.6	9.28978	2.98	0.169318
ENSMUSG00000050565	Tor1aip2	0.96	15	14	14	34	11	17.6	9.28978	27.6	1.56818
ENSMUSG00000051351	Zfp46	0.96	21	18	5	3	13	12	7.87401	0.17	0.0141667
ENSMUSG00000053347	Zfp943	0.96	4	6	2	2	2	3.2	1.78885	0.072	0.0225
ENSMUSG00000054021	Sirt5	0.96	20	40	22	16	5	20.6	12.6807	4.58	0.22233
ENSMUSG00000054199	Gon4l	0.96	19	10	6	4	5	8.8	6.14003	6.13	0.696591
ENSMUSG00000055239	Kcmf1	0.96	65	83	30	43	110	66.2	31.8229	71.7	1.08308
ENSMUSG00000055341	Zfp457	0.96	0.8	0.4	0.8	0.2	0.4	0.52	0.268328	0.042	0.0807692
ENSMUSG00000056413	Adap1	0.96	316	3	26	1	2	69.6	138.135	2.4	0.0344828
ENSMUSG00000056458	Mok	0.96	9	0.2	8	0.1	0.5	3.56	4.52581	0.313	0.0879213
ENSMUSG00000057181	5730455P16Rik	0.96	25	12	3	4	16	12	9.08295	0.471	0.03925
ENSMUSG00000057789	Bak1	0.96	29	30	30	23	20	26.4	4.61519	14.4	0.545455
ENSMUSG00000058586	Serhl	0.96	0.9	4	12	3	3	4.58	4.29907	1.93	0.421397
ENSMUSG00000058638	Zfp110	0.96	8	11	9	11	4	8.6	2.88097	0.124	0.0144186
ENSMUSG00000061436	Hipk2	0.96	31	39	13	14	44	28.2	14.2021	0.131	0.00464539
ENSMUSG00000061689	Dlgap4	0.96	193	32	17	5	19	53.2	78.735	19.8	0.37218
ENSMUSG00000061780	Cfd	0.96	0.4	198	541	3	694	287.28	316.576	323	1.12434
ENSMUSG00000062101	Zfp119b	0.96	2	1	1	1	1	1.2	0.447214	0.204	0.17
ENSMUSG00000062270	Morf4l1	0.96	81	36	25	29	30	40.2	23.1452	74.1	1.84328
ENSMUSG00000062510	Nsl1	0.96	1	0.4	0.5	0.2	0.4	0.5	0.3	0.77	1.54
ENSMUSG00000066595	Flvcr1	0.96	4	2	4	1	3	2.8	1.30384	0.154	0.055
ENSMUSG00000067889	Sptbn2	0.96	434	0.9	17	25	0.6	95.5	189.519	9.83	0.102932
ENSMUSG00000070000	Fcho1	0.96	112	0.8	2	0.4	0.1	23.06	49.7242	0.152	0.0065915
ENSMUSG00000070883	Ccdc173	0.96	1	0.9	1	0.3	0.2	0.68	0.396232	0.173	0.254412
ENSMUSG00000072235	Tuba1a	0.96	1075	82	37	4	30	245.6	464.499	385	1.56759
ENSMUSG00000073940	Hbb-bt	0.96	23	387	96	21	26	110.6	157.694	3101	28.038
ENSMUSG00000075470	Alg10b	0.96	10	15	5	8	5	8.6	4.15933	0.243	0.0282558
ENSMUSG00000078652	Psme3	0.96	125	69	57	63	41	71	31.9374	29.1	0.409859
ENSMUSG00000078672	Mup20	0.96	0.2	13	35	3602	14	732.84	1603.96	94.4	0.128814
ENSMUSG00000078994	Zfp429	0.96	1	0.8	1	1	0.4	0.84	0.260768	0.026	0.0309524
ENSMUSG00000079492	Gm11127	0.96	2	0.3	11	0.4	0.6	2.86	4.60196	0.746	0.260839
ENSMUSG00000090210	Itga10	0.96	2	1	1	0.8	1	1.16	0.477493	0.015	0.012931
ENSMUSG00000090231	Cfb	0.96	0.5	0.9	46	76	0.9	24.86	34.6546	161	6.47627
ENSMUSG00000001100	Poldip2	0.95	84	75	57	50	32	59.6	20.5743	8.33	0.139765
ENSMUSG00000001349	Cnn1	0.95	2	5	4	0.5	2	2.7	1.78885	29.3	10.8519
ENSMUSG00000001518	Itfg2	0.95	19	9	7	5	6	9.2	5.6745	39.2	4.26087
ENSMUSG00000001521	Tulp3	0.95	13	6	18	0.4	3	8.08	7.27544	0.461	0.0570545
ENSMUSG00000001767	Crnkl1	0.95	9	10	3	6	6	6.8	2.77489	2.31	0.339706
ENSMUSG00000002205	Vrk3	0.95	24	12	33	20	10	19.8	9.33809	1.5	0.0757576
ENSMUSG00000002500	Rpl3l	0.95	2	169	4	1	528	140.8	228.168	9.05	0.0642756
ENSMUSG00000003226	Ranbp2	0.95	24	17	6	16	11	14.8	6.76018	34.8	2.35135
ENSMUSG00000003808	Farsa	0.95	29	12	15	14	11	16.2	7.32803	101	6.23457
ENSMUSG00000004567	Mcoln1	0.95	87	23	48	29	20	41.4	27.7182	0.324	0.00782609
ENSMUSG00000005150	Wdr83	0.95	16	11	13	9	8	11.4	3.20936	0.172	0.0150877
ENSMUSG00000005621	Zfp592	0.95	22	20	16	15	9	16.4	5.02991	0.36	0.0219512
ENSMUSG00000005672	Kit	0.95	38	4	6	2	0.5	10.1	15.7337	0.7	0.0693069
ENSMUSG00000005698	Ctcf	0.95	36	22	14	14	10	19.2	10.3537	27.9	1.45312
ENSMUSG00000006567	Atp7b	0.95	2	0.1	2	18	0.1	4.44	7.63957	0.262	0.059009
ENSMUSG00000006678	Pola1	0.95	0.8	1	0.6	0.5	0.3	0.64	0.270185	30.1	47.0312
ENSMUSG00000007659	Bcl2l1	0.95	140	25	74	36	8	56.6	52.5433	5.53	0.0977032
ENSMUSG00000012396	Nanog	0.95	0.5	0.1	0.4	0.2	0.2	0.28	0.164317	0.676	2.41429
ENSMUSG00000012443	Kif11	0.95	0.7	0.7	0.7	0.3	0.2	0.52	0.248998	39.3	75.5769
ENSMUSG00000013593	Ndufs2	0.95	211	765	454	176	474	416	237.82	57.8	0.138942
ENSMUSG00000014355	Anapc1	0.95	13	13	5	7	4	8.4	4.3359	8.41	1.00119
ENSMUSG00000016194	Hsd11b1	0.95	6	3	36	154	1	40	65.3031	77.2	1.93
ENSMUSG00000016756	Cmah	0.95	1	3	7	47	0.9	11.78	19.8429	0.765	0.0649406
ENSMUSG00000018286	Psmb6	0.95	62	31	125	61	63	68.4	34.3773	558	8.15789
ENSMUSG00000019470	Xab2	0.95	41	11	24	14	7	19.4	13.6125	28.3	1.45876
ENSMUSG00000019813	Cep57l1	0.95	2	1	0.9	1	0.6	1.1	0.52915	0.151	0.137273
ENSMUSG00000019923	Zwint	0.95	431	19	33	25	14	104.4	182.712	152	1.45594
ENSMUSG00000020079	Supv3l1	0.95	20	29	15	14	7	17	8.15475	23.3	1.37059
ENSMUSG00000020386	Sar1b	0.95	55	67	83	197	356	151.6	127.51	218	1.43799
ENSMUSG00000020474	Polm	0.95	8	4	12	4	3	6.2	3.76829	0.507	0.0817742
ENSMUSG00000020536	Llgl1	0.95	73	15	15	6	8	23.4	28.0232	25.3	1.0812
ENSMUSG00000020547	Bzw2	0.95	47	168	20	9	58	60.4	63.319	56.4	0.933775
ENSMUSG00000020654	Adcy3	0.95	40	3	4	0.6	0.9	9.7	16.9979	0.58	0.0597938
ENSMUSG00000020681	Ace	0.95	30	36	108	0.6	14	37.72	41.6604	12.8	0.339343
ENSMUSG00000021260	Hhipl1	0.95	6	0.8	0.8	0.4	0.6	1.72	2.39833	0.001	0.000581395
ENSMUSG00000021280	Exoc3l4	0.95	3	3	19	0.3	1	5.26	7.77419	0.938	0.178327
ENSMUSG00000021460	Auh	0.95	9	9	15	4	5	8.4	4.3359	32.4	3.85714
ENSMUSG00000021555	Naa35	0.95	22	18	10	8	5	12.6	7.12741	29.2	2.31746
ENSMUSG00000021701	Plk2	0.95	144	14	9	6	3	35.2	60.9565	0.754	0.0214205
ENSMUSG00000022048	Dpysl2	0.95	633	54	15	6	8	143.2	274.499	172	1.20112
ENSMUSG00000022180	Slc7a8	0.95	99	7	208	5	11	66	88.713	0.886	0.0134242
ENSMUSG00000022360	Atad2	0.95	3	2	0.9	1	0.5	1.48	1.01341	1.33	0.898649
ENSMUSG00000022385	Gtse1	0.95	2	1	0.8	0.9	0.1	0.96	0.680441	66.7	69.4792
ENSMUSG00000022617	Chkb	0.95	15	12	17	11	5	12	4.58258	27.8	2.31667
ENSMUSG00000022685	Parn	0.95	29	11	19	18	5	16.4	9.04434	12.7	0.77439
ENSMUSG00000022707	Gbe1	0.95	5	23	7	38	12	17	13.6565	8.28	0.487059
ENSMUSG00000022865	Cxadr	0.95	7	19	9	27	0.4	12.48	10.5049	4.46	0.357372
ENSMUSG00000022887	Masp1	0.95	6	10	1	60	0.8	15.56	25.135	9.86	0.633676
ENSMUSG00000022967	Ifnar1	0.95	31	12	11	15	5	14.8	9.75705	0.111	0.0075
ENSMUSG00000024246	Thumpd2	0.95	4	3	4	3	2	3.2	0.83666	1.91	0.596875
ENSMUSG00000024308	Tapbp	0.95	59	93	86	112	26	75.2	33.432	8.61	0.114495
ENSMUSG00000024325	Ring1	0.95	52	15	33	18	15	26.6	16.0406	5.38	0.202256
ENSMUSG00000024855	Pacs1	0.95	112	41	12	2	5	34.4	46.0467	19.5	0.56686
ENSMUSG00000024937	Ehbp1l1	0.95	14	114	8	4	219	71.8	94.1499	0.567	0.00789694
ENSMUSG00000025026	Add3	0.95	61	39	37	3	7	29.4	24.224	38.3	1.30272
ENSMUSG00000025236	Adpgk	0.95	21	10	12	16	6	13	5.74456	4.24	0.326154
ENSMUSG00000025488	Cox8b	0.95	2	519	34	0.4	985	308.08	437.658	79.4	0.257725
ENSMUSG00000025980	Hspd1	0.95	112	264	189	235	87	177.4	76.4873	4175	23.5344
ENSMUSG00000026344	Lypd1	0.95	18	0.1	0.7	0.1	0.1	3.8	7.94229	0.436	0.114737
ENSMUSG00000026484	Rnf2	0.95	12	7	6	6	3	6.8	3.27109	25	3.67647
ENSMUSG00000026491	Ahctf1	0.95	7	4	3	7	4	5	1.87083	1.11	0.222
ENSMUSG00000026554	Dcaf8	0.95	31	25	31	22	37	29.2	5.84808	9.33	0.319521
ENSMUSG00000026748	Plxdc2	0.95	12	8	18	0.1	3	8.22	7.12685	3	0.364964
ENSMUSG00000026888	Grb14	0.95	9	61	6	14	2	18.4	24.2136	0.414	0.0225
ENSMUSG00000026971	Itgb6	0.95	0.1	13	32	0.2	7	10.46	13.1814	0.851	0.0813576
ENSMUSG00000027016	Zfp385b	0.95	19	3	1	3	0.7	5.34	7.7122	0.464	0.0868914
ENSMUSG00000027303	Ptpra	0.95	115	21	61	17	8	44.4	44.3937	2.44	0.054955
ENSMUSG00000027327	1700037H04Rik	0.95	86	17	36	5	8	30.4	33.3512	142	4.67105
ENSMUSG00000027365	Trpm7	0.95	7	8	9	5	3	6.4	2.40832	0.276	0.043125
ENSMUSG00000027475	Kif3b	0.95	41	6	11	7	3	13.6	15.582	12.4	0.911765
ENSMUSG00000027810	Eif2a	0.95	14	11	7	9	6	9.4	3.20936	150	15.9574
ENSMUSG00000027947	Il6ra	0.95	4	3	2	20	3	6.4	7.63544	0.002	0.0003125
ENSMUSG00000027951	Adar	0.95	74	9	8	10	1	20.4	30.1712	7.74	0.379412
ENSMUSG00000028048	Gba	0.95	51	12	34	21	13	26.2	16.4225	7.76	0.296183
ENSMUSG00000028064	Sema4a	0.95	42	3	67	46	2	32	28.557	1.94	0.060625
ENSMUSG00000028081	Rps3a1	0.95	353	350	500	361	240	360.8	92.3943	443	1.22783
ENSMUSG00000028619	Tceanc2	0.95	7	4	5	4	4	4.8	1.30384	0.718	0.149583
ENSMUSG00000029063	Nadk	0.95	64	30	104	171	16	77	62.578	39.4	0.511688
ENSMUSG00000029461	Fam168a	0.95	147	28	9	14	14	42.4	58.9008	1.28	0.0301887
ENSMUSG00000029505	Ep400	0.95	24	11	9	8	4	11.2	7.59605	11.1	0.991071
ENSMUSG00000029664	Tfpi2	0.95	0.2	0.8	6	43	0.1	10.02	18.599	0.499	0.0498004
ENSMUSG00000030060	Hmces	0.95	19	5	15	8	3	10	6.78233	13.8	1.38
ENSMUSG00000030208	Emp1	0.95	2	37	11	1	14	13	14.543	0.915	0.0703846
ENSMUSG00000030298	Sec13	0.95	42	48	111	45	45	58.2	29.5922	168	2.8866
ENSMUSG00000030505	Prmt3	0.95	12	6	7	4	8	7.4	2.96648	50.6	6.83784
ENSMUSG00000030619	Eed	0.95	14	15	10	12	9	12	2.54951	2.72	0.226667
ENSMUSG00000030703	Gdpd3	0.95	2	0.9	14	0.1	2	3.8	5.75804	0.019	0.005
ENSMUSG00000030766	Arhgap17	0.95	14	12	19	7	8	12	4.84768	13.7	1.14167
ENSMUSG00000030838	Ush1c	0.95	0.3	3	78	0.1	2	16.68	34.3001	0.369	0.0221223
ENSMUSG00000030970	Ctbp2	0.95	14	8	10	0.6	3	7.12	5.38256	114	16.0112
ENSMUSG00000030979	Uros	0.95	16	12	19	11	6	12.8	4.96991	33.5	2.61719
ENSMUSG00000031226	Pbdc1	0.95	6	2	5	3	2	3.6	1.81659	208	57.7778
ENSMUSG00000031448	Adprhl1	0.95	0.3	359	0.3	0.1	21	76.14	158.379	3.23	0.0424219
ENSMUSG00000031574	Star	0.95	6	3	78	2	2	18.2	33.4694	0.209	0.0114835
ENSMUSG00000033020	Polr2f	0.95	356	148	190	176	118	197.6	92.7513	335	1.69534
ENSMUSG00000033149	Phldb2	0.95	2	7	25	9	1	8.8	9.65401	0.862	0.0979545
ENSMUSG00000033323	Ctdp1	0.95	13	8	13	7	6	9.4	3.36155	40.7	4.32979
ENSMUSG00000033751	Gadd45gip1	0.95	28	14	24	22	13	20.2	6.49615	3.65	0.180693
ENSMUSG00000033972	Zfp944	0.95	5	2	4	3	2	3.2	1.30384	0.052	0.01625
ENSMUSG00000034248	Slc25a37	0.95	19	21	11	17	9	15.4	5.17687	0.002	0.00012987
ENSMUSG00000034312	Iqsec1	0.95	283	85	57	21	25	94.2	108.698	3.87	0.0410828
ENSMUSG00000034432	Cops8	0.95	47	34	21	11	27	28	13.5647	13	0.464286
ENSMUSG00000034520	Gjc1	0.95	2	8	3	0.2	0.9	2.82	3.08577	0.58	0.205674
ENSMUSG00000034595	Ppp1r18	0.95	9	14	9	3	4	7.8	4.43847	19.1	2.44872
ENSMUSG00000034744	Nagk	0.95	28	7	25	7	3	14	11.5758	2.26	0.161429
ENSMUSG00000035236	Scai	0.95	7	1	0.6	0.6	0.2	1.88	2.87611	4.08	2.17021
ENSMUSG00000036006	Ripor2	0.95	18	3	0.6	0.4	2	4.8	7.4552	0.3	0.0625
ENSMUSG00000036270	Edc4	0.95	55	25	22	11	16	25.8	17.1959	38.2	1.48062
ENSMUSG00000036781	Rps27l	0.95	19	24	193	122	47	81	74.9567	368	4.54321
ENSMUSG00000037020	Wdr62	0.95	0.9	0.8	3	1	1	1.34	0.931665	19.7	14.7015
ENSMUSG00000037720	Tmem33	0.95	27	9	19	18	4	15.4	9.01665	16.8	1.09091
ENSMUSG00000037991	Rmi2	0.95	1	0.8	1	0.3	2	1.02	0.618061	0.396	0.388235
ENSMUSG00000038178	Slc43a2	0.95	43	8	68	3	6	25.6	28.7454	0.665	0.0259766
ENSMUSG00000038187	Btbd10	0.95	19	5	2	0.6	2	5.72	7.59552	0.28	0.048951
ENSMUSG00000038462	Uqcrfs1	0.95	115	674	400	180	254	324.6	222.256	114	0.351201
ENSMUSG00000038496	Slc19a3	0.95	3	0.5	9	0.1	0.1	2.54	3.80828	0	0
ENSMUSG00000038564	Ift172	0.95	46	24	18	9	16	22.6	14.1351	0.054	0.00238938
ENSMUSG00000038936	Sccpdh	0.95	14	11	5	0.4	6	7.28	5.31902	9.6	1.31868
ENSMUSG00000039997	Ifi203	0.95	1	13	2	3	1	4	5.09902	0.491	0.12275
ENSMUSG00000040007	Bahd1	0.95	45	15	26	7	4	19.4	16.6523	0.109	0.00561856
ENSMUSG00000040287	Stac3	0.95	5	1	1	0.5	224	46.3	99.3539	0.558	0.0120518
ENSMUSG00000040690	Col16a1	0.95	10	6	9	0.9	3	5.78	3.86549	0.627	0.108478
ENSMUSG00000041570	Camsap2	0.95	36	8	4	4	2	10.8	14.2548	0.62	0.0574074
ENSMUSG00000041654	Slc39a11	0.95	23	3	19	22	2	13.8	10.4259	0.545	0.0394928
ENSMUSG00000042709	Atpaf2	0.95	28	32	37	21	20	27.6	7.23187	6.15	0.222826
ENSMUSG00000044145	1810024B03Rik	0.95	0.3	0.2	4	0.6	0.4	1.1	1.62788	0.056	0.0509091
ENSMUSG00000044788	Fads6	0.95	26	2	11	50	3	18.4	20.1072	0.105	0.00570652
ENSMUSG00000045098	Kmt5b	0.95	11	7	5	4	3	6	3.16228	0.138	0.023
ENSMUSG00000045996	Polr2k	0.95	23	12	23	19	23	20	4.79583	0.114	0.0057
ENSMUSG00000046169	Adamts6	0.95	1	1	1	0.2	0.2	0.68	0.438178	0.545	0.801471
ENSMUSG00000046185	Zfp84	0.95	10	8	6	5	3	6.4	2.70185	0.104	0.01625
ENSMUSG00000047557	Lxn	0.95	56	5	4	0.6	0.9	13.3	23.9464	4.63	0.34812
ENSMUSG00000047658	Gal3st3	0.95	149	54	0.9	0.1	0.4	40.88	64.7343	0.022	0.00053816
ENSMUSG00000047878	A4galt	0.95	7	7	52	0.7	3	13.94	21.4469	0.195	0.0139885
ENSMUSG00000049751	Rpl36al	0.95	29	26	69	96	112	66.4	38.7079	290	4.36747
ENSMUSG00000050212	Eva1b	0.95	4	6	54	4	3	14.2	22.2755	3.13	0.220423
ENSMUSG00000050552	Lamtor4	0.95	52	17	151	33	87	68	53.2259	6.4	0.0941176
ENSMUSG00000050954	Zfp169	0.95	5	1	0.7	1	0.7	1.68	1.86199	0.076	0.0452381
ENSMUSG00000051166	Eml5	0.95	15	1	5	1	0.8	4.56	6.09656	0.044	0.00964912
ENSMUSG00000051375	Pcdh1	0.95	175	16	35	60	3	57.8	68.9398	4.64	0.0802768
ENSMUSG00000052296	Ppp6r1	0.95	269	111	126	109	48	132.6	81.8981	73.7	0.555807
ENSMUSG00000053310	Nrgn	0.95	3800	20	9	0.8	2	766.36	1695.87	45.5	0.0593716
ENSMUSG00000054823	Nsd3	0.95	15	6	5	9	3	7.6	4.66905	0.835	0.109868
ENSMUSG00000055782	Abcd2	0.95	15	3	0.6	5	12	7.12	6.12144	1.63	0.228933
ENSMUSG00000056025	Clca3a1	0.95	0.2	1	3	2	0.3	1.3	1.19164	1.06	0.815385
ENSMUSG00000057411	Fam173a	0.95	137	25	150	31	42	77	61.1841	2.03	0.0263636
ENSMUSG00000057880	Abat	0.95	164	11	99	110	0.8	76.96	69.4702	60.4	0.784823
ENSMUSG00000058806	Col13a1	0.95	1	0.7	2	2	0.8	1.3	0.648074	0.271	0.208462
ENSMUSG00000059713	Rcan3	0.95	43	9	11	1	2	13.2	17.2105	0.621	0.0470455
ENSMUSG00000060407	Cyp2a12	0.95	1	0.9	10	758	0.6	154.1	337.614	42.4	0.275146
ENSMUSG00000060716	Plekhh1	0.95	29	3	7	0.2	0.4	7.92	12.0993	0.003	0.000378788
ENSMUSG00000062006	Rpl34	0.95	37	20	93	40	33	44.6	28.1123	140	3.13901
ENSMUSG00000066036	Ubr4	0.95	67	40	25	32	37	40.2	16.0219	30.7	0.763682
ENSMUSG00000066613	Zfp932	0.95	6	2	2	1	1	2.4	2.07364	0.23	0.0958333
ENSMUSG00000070287	Slc35g2	0.95	19	5	2	0.9	0.4	5.46	7.77676	0.092	0.0168498
ENSMUSG00000070643	Sox13	0.95	16	16	33	5	4	14.8	11.6919	0.616	0.0416216
ENSMUSG00000070858	Gm1673	0.95	132	2	3	0.6	0.1	27.54	58.4061	0.134	0.00486565
ENSMUSG00000071350	Setdb2	0.95	1	2	2	4	1	2	1.22474	1	0.5
ENSMUSG00000078622	Ccdc47	0.95	37	36	21	26	24	28.8	7.25948	17.9	0.621528
ENSMUSG00000079164	Tlr5	0.95	0.4	1	0.4	3	1	1.16	1.07145	0.108	0.0931034
ENSMUSG00000091586	Cyp4f17	0.95	6	6	21	18	4	11	7.87401	0.199	0.0180909
ENSMUSG00000096146	Kcnj11	0.95	94	246	0.3	0.1	150	98.08	104.587	1.91	0.0194739
ENSMUSG00000000149	Gna12	0.94	195	152	115	101	20	116.6	65.1483	5.71	0.0489708
ENSMUSG00000001119	Col6a1	0.94	49	99	38	6	48	48	33.4141	9.46	0.197083
ENSMUSG00000003970	Rpl8	0.94	655	380	1389	462	411	659.4	421.625	422	0.639976
ENSMUSG00000004980	Hnrnpa2b1	0.94	204	208	172	150	191	185	24.0832	1231	6.65405
ENSMUSG00000005686	Ampd3	0.94	19	38	12	0.3	3	14.46	15.1049	2.22	0.153527
ENSMUSG00000006235	Epor	0.94	18	1	15	1	0.4	7.08	8.66787	0	0
ENSMUSG00000006932	Ctnnb1	0.94	235	157	130	93	46	132.2	70.9838	131	0.990923
ENSMUSG00000007591	Tssk4	0.94	1	0.2	0.3	0.2	0.1	0.36	0.364692	0.004	0.0111111
ENSMUSG00000007850	Hnrnph1	0.94	78	44	36	17	21	39.2	24.3043	253	6.45408
ENSMUSG00000007891	Ctsd	0.94	542	805	669	340	506	572.4	175.198	386	0.674354
ENSMUSG00000009145	Dqx1	0.94	0.6	2	17	10	0.7	6.06	7.24969	0.279	0.0460396
ENSMUSG00000010936	Vac14	0.94	58	24	33	29	14	31.6	16.3799	44.2	1.39873
ENSMUSG00000011958	Bnip2	0.94	10	37	11	14	26	19.6	11.6319	2.08	0.106122
ENSMUSG00000014075	Tctex1d2	0.94	4	1	8	0.4	0.8	2.84	3.21994	0.37	0.130282
ENSMUSG00000014873	Surf2	0.94	13	7	18	6	5	9.8	5.54076	88.3	9.0102
ENSMUSG00000015659	Serac1	0.94	13	7	3	1	5	5.8	4.60435	0.292	0.0503448
ENSMUSG00000017715	Pgs1	0.94	52	10	14	6	10	18.4	18.9947	0.804	0.0436957
ENSMUSG00000017756	Slc12a7	0.94	7	214	78	51	4	70.8	85.8528	24.6	0.347458
ENSMUSG00000018340	Anxa6	0.94	157	256	74	149	165	160.2	64.7433	173	1.0799
ENSMUSG00000018654	Ikzf1	0.94	2	2	0.6	0.9	0.4	1.18	0.769415	2	1.69492
ENSMUSG00000018821	Avpi1	0.94	37	9	24	43	11	24.8	15.1723	0.044	0.00177419
ENSMUSG00000018921	Pelp1	0.94	63	32	21	18	15	29.8	19.6392	50.6	1.69799
ENSMUSG00000018983	E2f2	0.94	0.7	1	2	2	2	1.54	0.638749	0.089	0.0577922
ENSMUSG00000019891	Dcbld1	0.94	5	2	6	1	0.5	2.9	2.45967	0.086	0.0296552
ENSMUSG00000020059	Sycp3	0.94	2	1	2	0.2	0.4	1.12	0.85557	0.642	0.573214
ENSMUSG00000020088	Sar1a	0.94	104	93	64	65	67	78.6	18.6091	273	3.47328
ENSMUSG00000020184	Mdm2	0.94	23	23	15	10	16	17.4	5.59464	0.103	0.00591954
ENSMUSG00000020520	Galnt10	0.94	17	8	11	7	5	9.6	4.66905	0.207	0.0215625
ENSMUSG00000020818	Mfsd11	0.94	19	11	13	5	6	10.8	5.6745	0.623	0.0576852
ENSMUSG00000020883	Fbxl20	0.94	17	8	8	6	5	8.8	4.76445	1.52	0.172727
ENSMUSG00000021339	Mrs2	0.94	22	25	5	6	16	14.8	9.09395	1.26	0.0851351
ENSMUSG00000021373	Cap2	0.94	203	129	0.6	0.2	132	92.96	89.5357	4.47	0.0480852
ENSMUSG00000021376	Tpmt	0.94	6	2	37	18	0.9	12.78	15.1424	91.9	7.19092
ENSMUSG00000021709	Erbin	0.94	22	16	12	15	7	14.4	5.50454	2.19	0.152083
ENSMUSG00000022114	Spry2	0.94	156	37	15	3	8	43.8	64.0523	3.38	0.0771689
ENSMUSG00000022329	Stk3	0.94	8	5	5	4	1	4.6	2.50998	19.9	4.32609
ENSMUSG00000022443	Myh9	0.94	58	65	114	62	18	63.4	34.1145	155	2.44479
ENSMUSG00000022840	Adcy5	0.94	236	63	4	1	3	61.4	101.046	0.821	0.0133713
ENSMUSG00000023043	Krt18	0.94	3	7	46	436	3	99	189.258	269	2.71717
ENSMUSG00000023110	Prmt5	0.94	44	20	21	11	21	23.4	12.2597	152	6.49573
ENSMUSG00000023994	Nfya	0.94	9	6	8	4	2	5.8	2.86356	95.1	16.3966
ENSMUSG00000024013	Fgd2	0.94	5	2	4	3	1	3	1.58114	0.81	0.27
ENSMUSG00000024219	Anks1	0.94	25	59	18	9	7	23.6	21.0666	13.4	0.567797
ENSMUSG00000024457	Trim26	0.94	13	9	13	16	7	11.6	3.57771	0.549	0.0473276
ENSMUSG00000024493	Lars	0.94	26	20	17	18	16	19.4	3.97492	9.78	0.504124
ENSMUSG00000024639	Gnaq	0.94	103	18	14	8	5	29.6	41.3437	14.9	0.503378
ENSMUSG00000024736	Tmem132a	0.94	254	9	12	2	2	55.8	110.884	0.358	0.00641577
ENSMUSG00000025153	Fasn	0.94	218	160	113	341	98	186	98.486	162	0.870968
ENSMUSG00000025373	Rnf41	0.94	79	11	14	5	6	23	31.5198	0.036	0.00156522
ENSMUSG00000025377	Tepsin	0.94	29	12	21	13	5	16	9.21954	1.11	0.069375
ENSMUSG00000025428	Atp5a1	0.94	948	3444	1386	761	971	1502	1109.37	1019	0.678429
ENSMUSG00000025804	Ccr1	0.94	0.1	0.8	0.3	0.2	0.3	0.34	0.270185	0.098	0.288235
ENSMUSG00000025815	Dhtkd1	0.94	6	3	11	19	1	8	7.2111	39.1	4.8875
ENSMUSG00000026024	Als2	0.94	20	4	7	26	7	12.8	9.62808	9.16	0.715625
ENSMUSG00000026289	Atg16l1	0.94	22	10	4	11	5	10.4	7.1624	23.1	2.22115
ENSMUSG00000026377	Nifk	0.94	13	11	15	25	11	15	5.83095	11.2	0.746667
ENSMUSG00000026421	Csrp1	0.94	591	57	148	17	26	167.8	242.185	246	1.46603
ENSMUSG00000026463	Atp2b4	0.94	73	11	4	1	4	18.6	30.6317	16.2	0.870968
ENSMUSG00000026632	Tatdn3	0.94	15	7	6	4	6	7.6	4.27785	15.8	2.07895
ENSMUSG00000026696	Vamp4	0.94	32	4	7	3	3	9.8	12.518	17.5	1.78571
ENSMUSG00000026806	Ddx31	0.94	6	3	3	5	3	4	1.41421	2.14	0.535
ENSMUSG00000026853	Crat	0.94	42	367	80	26	192	141.4	141.795	17.4	0.123055
ENSMUSG00000027007	Ssfa2	0.94	24	14	27	20	4	17.8	9.1214	0.986	0.0553933
ENSMUSG00000027395	Polr1b	0.94	11	8	8	9	7	8.6	1.51658	1.03	0.119767
ENSMUSG00000027411	Vps16	0.94	32	12	23	11	8	17.2	10.0349	20.3	1.18023
ENSMUSG00000027562	Car2	0.94	180	5	255	7	3	90	119.382	465	5.16667
ENSMUSG00000027715	Ccna2	0.94	1	1	1	0.2	0.2	0.68	0.438178	66	97.0588
ENSMUSG00000028017	Egf	0.94	0.4	2	255	0.1	5	52.5	113.218	1.41	0.0268571
ENSMUSG00000028030	Tbck	0.94	9	6	3	4	2	4.8	2.77489	0.09	0.01875
ENSMUSG00000028634	Hivep3	0.94	21	2	0.9	0.2	0.4	4.9	9.02718	0.866	0.176735
ENSMUSG00000028634	Hivep3	0.94	21	2	0.9	0.2	0.4	4.9	9.02718	1.58	0.322449
ENSMUSG00000029388	Eif2b1	0.94	17	19	20	19	17	18.4	1.34164	137	7.44565
ENSMUSG00000029553	Tfec	0.94	0.3	0.2	11	1	0.1	2.52	4.75363	0.099	0.0392857
ENSMUSG00000029630	Cyp3a25	0.94	0.4	0.7	4	259	0.2	52.86	115.246	0.759	0.0143587
ENSMUSG00000029798	Herc6	0.94	4	3	1	6	0.6	2.92	2.22081	0.185	0.0633562
ENSMUSG00000029847	Slc23a4	0.94	0.7	1	0.3	0.1	0.1	0.44	0.397492	0.042	0.0954545
ENSMUSG00000030108	Slc6a13	0.94	18	0.7	141	235	1	79.14	105.019	0.996	0.0125853
ENSMUSG00000030432	Rpl28	0.94	267	167	622	241	176	294.6	187.865	697	2.36592
ENSMUSG00000031706	Rfx1	0.94	44	14	20	8	5	18.2	15.5306	0.606	0.0332967
ENSMUSG00000031844	Hsd17b2	0.94	3	0.3	13	311	0.2	65.5	137.339	62	0.946565
ENSMUSG00000032289	Thsd4	0.94	4	2	1	0.3	0.2	1.5	1.57162	0.138	0.092
ENSMUSG00000032480	Dhx30	0.94	45	14	17	10	7	18.6	15.2414	17.4	0.935484
ENSMUSG00000032604	Qars	0.94	23	21	26	19	19	21.6	2.96648	9.66	0.447222
ENSMUSG00000033216	Eefsec	0.94	27	6	32	34	3	20.4	14.775	3.52	0.172549
ENSMUSG00000033544	Angptl1	0.94	1	2	1	0.1	3	1.42	1.10995	0.171	0.120423
ENSMUSG00000033983	Coil	0.94	5	1	2	1	0.7	1.94	1.77989	8.71	4.48969
ENSMUSG00000034509	Mad2l1bp	0.94	17	23	25	13	19	19.4	4.77493	1.15	0.0592784
ENSMUSG00000034574	Daam1	0.94	34	47	6	15	5	21.4	18.4472	2.99	0.13972
ENSMUSG00000034709	Ppp1r21	0.94	45	5	23	10	3	17.2	17.3839	18.1	1.05233
ENSMUSG00000034810	Scn7a	0.94	1	9	0.1	0.1	0.8	2.2	3.82296	0.079	0.0359091
ENSMUSG00000035093	Secisbp2l	0.94	43	12	11	17	4	17.4	15.0433	0.303	0.0174138
ENSMUSG00000035900	Gramd4	0.94	37	25	11	4	6	16.6	14.0464	0.732	0.0440964
ENSMUSG00000036764	Dnajc12	0.94	10	3	90	12	4	23.8	37.2048	0.077	0.00323529
ENSMUSG00000036898	Zfp157	0.94	5	1	2	0.6	0.3	1.78	1.91102	0.846	0.475281
ENSMUSG00000037351	Actr1b	0.94	257	54	84	45	75	103	87.5014	113	1.09709
ENSMUSG00000037622	Wdtc1	0.94	147	106	91	111	89	108.8	23.3495	66.5	0.611213
ENSMUSG00000037742	Eef1a1	0.94	2390	730	3266	3725	206	2063.4	1544.48	3930	1.90462
ENSMUSG00000037935	Smarce1	0.94	18	14	12	9	10	12.6	3.57771	67.1	5.3254
ENSMUSG00000038056	Kmt2c	0.94	15	10	4	3	6	7.6	4.9295	0.28	0.0368421
ENSMUSG00000038147	Cd84	0.94	0.6	0.8	0.7	0.9	0.2	0.64	0.270185	0.409	0.639062
ENSMUSG00000038256	Bcl9	0.94	33	16	8	2	1	12	13.1719	0.248	0.0206667
ENSMUSG00000038486	Sv2a	0.94	597	6	22	0.1	0.2	125.06	263.974	8.26	0.0660483
ENSMUSG00000038528	Mfsd4b5	0.94	0.3	0.7	81	0.4	0.4	16.56	36.0234	0.074	0.0044686
ENSMUSG00000039824	Myl6b	0.94	66	4	19	2	9	20	26.5424	16.4	0.82
ENSMUSG00000040029	Ipo8	0.94	14	8	9	13	4	9.6	4.03733	30.4	3.16667
ENSMUSG00000040183	Ankrd6	0.94	21	1	1	0.2	1	4.84	9.04035	0.887	0.183264
ENSMUSG00000040699	Limd2	0.94	58	5	18	6	3	18	23.1193	5.73	0.318333
ENSMUSG00000041920	Slc16a6	0.94	8	7	5	8	3	6.2	2.16795	0.007	0.00112903
ENSMUSG00000042500	Ago4	0.94	6	7	0.6	0.8	3	3.48	2.93462	0.53	0.152299
ENSMUSG00000044477	Zfand3	0.94	127	104	69	65	103	93.6	26.1496	0.096	0.00102564
ENSMUSG00000044496	2510039O18Rik	0.94	56	53	70	39	19	47.4	19.321	1.23	0.0259494
ENSMUSG00000045374	Wdr81	0.94	26	7	22	21	4	16	9.82344	9.22	0.57625
ENSMUSG00000046351	Zfp322a	0.94	9	6	1	3	3	4.4	3.1305	0.008	0.00181818
ENSMUSG00000047155	Cyp4x1	0.94	12	0.1	0.8	0.4	0.3	2.72	5.19394	0.066	0.0242647
ENSMUSG00000047721	Bola2	0.94	16	3	35	8	10	14.4	12.4218	474	32.9167
ENSMUSG00000048550	Thnsl1	0.94	8	4	2	2	2	3.6	2.60768	2.33	0.647222
ENSMUSG00000048647	Exd1	0.94	1	0.2	0.1	0.8	1	0.62	0.438178	0.5	0.806452
ENSMUSG00000049932	H2afx	0.94	53	12	22	13	7	21.4	18.4743	703	32.8505
ENSMUSG00000050332	Amer1	0.94	3	3	2	2	4	2.8	0.83666	0.027	0.00964286
ENSMUSG00000050608	Minos1	0.94	58	58	89	25	60	58	22.6605	8.09	0.139483
ENSMUSG00000051379	Flrt3	0.94	15	0.2	0.7	0.2	0.1	3.24	6.57822	0.045	0.0138889
ENSMUSG00000055707	Klhl26	0.94	78	13	17	6	9	24.6	30.138	0.016	0.000650407
ENSMUSG00000060771	Tsga10	0.94	2	0.5	0.4	0.3	0.7	0.78	0.697854	0.009	0.0115385
ENSMUSG00000061451	Tmem151a	0.94	309	5	6	0.2	0.1	64.06	136.952	0.012	0.000187324
ENSMUSG00000061613	U2af1	0.94	78	44	101	78	32	66.6	28.0678	132	1.98198
ENSMUSG00000062116	Zfp954	0.94	8	3	9	5	3	5.6	2.79285	0.316	0.0564286
ENSMUSG00000062647	Rpl7a	0.94	177	158	705	214	145	279.8	239.112	627	2.24089
ENSMUSG00000063683	Glyat	0.94	0.1	0.1	96	60	0.2	31.28	44.5081	103	3.29284
ENSMUSG00000064354	mt-Co2	0.94	51	283	33	77	39	96.6	105.559	173	1.79089
ENSMUSG00000066357	Wdr6	0.94	242	22	40	11	5	64	100.392	18.1	0.282813
ENSMUSG00000066406	Akap13	0.94	10	27	8	11	14	14	7.58288	0.896	0.064
ENSMUSG00000066900	Suds3	0.94	125	50	98	66	65	80.8	30.2771	54.2	0.670792
ENSMUSG00000068874	Selenbp1	0.94	14	82	545	218	13	174.4	223.361	47.3	0.271216
ENSMUSG00000074500	Zfp558	0.94	0.7	0.4	0.1	0.2	0.2	0.32	0.238747	0.201	0.628125
ENSMUSG00000074793	Hspa12b	0.94	14	29	9	1	12	13	10.2225	0.872	0.0670769
ENSMUSG00000079020	Slc45a4	0.94	33	10	18	3	7	14.2	11.8617	0.31	0.021831
ENSMUSG00000079065	BC005561	0.94	3	1	0.9	1	0.9	1.36	0.91815	1.3	0.955882
ENSMUSG00000079434	Neu2	0.94	4	0.1	9	2	13	5.62	5.29358	0.118	0.0209964
ENSMUSG00000079450	Cldn34c1	0.94	0.5	0.4	0.7	0.2	0.1	0.38	0.238747	0.006	0.0157895
ENSMUSG00000001700	Gramd3	0.93	29	17	23	28	10	21.4	7.95613	0.556	0.0259813
ENSMUSG00000001751	Naglu	0.93	19	12	55	39	4	25.8	20.8495	6.61	0.256202
ENSMUSG00000001988	Npas1	0.93	30	1	1	0.3	0.5	6.56	13.107	0.002	0.000304878
ENSMUSG00000002504	Slc9a3r2	0.93	99	106	94	21	26	69.2	41.9726	13.2	0.190751
ENSMUSG00000002718	Cse1l	0.93	26	23	10	11	16	17.2	7.12039	177	10.2907
ENSMUSG00000002992	Apoc2	0.93	0.9	0.4	2	288	0.4	58.34	128.386	507	8.69044
ENSMUSG00000003382	Etv3	0.93	10	9	4	4	2	5.8	3.49285	1.1	0.189655
ENSMUSG00000004849	Ap1s1	0.93	300	20	76	33	18	89.4	120.028	154	1.7226
ENSMUSG00000005142	Man2b1	0.93	48	41	119	85	9	60.4	42.4594	29.6	0.490066
ENSMUSG00000005667	Mthfd2	0.93	7	2	3	2	2	3.2	2.16795	55.9	17.4688
ENSMUSG00000005846	Rsl1d1	0.93	35	34	23	27	23	28.4	5.81378	27.2	0.957746
ENSMUSG00000006464	Bbs1	0.93	38	2	9	1	1	10.2	15.8965	0.148	0.0145098
ENSMUSG00000013483	Card14	0.93	0.8	0.3	6	0.1	0.6	1.56	2.4966	0.08	0.0512821
ENSMUSG00000014402	Tsg101	0.93	49	32	27	25	21	30.8	10.9179	77.6	2.51948
ENSMUSG00000018927	Ccl6	0.93	1	12	6	7	13	7.8	4.86826	2.35	0.301282
ENSMUSG00000019843	Fyn	0.93	113	34	4	4	3	31.6	47.3635	13.7	0.433544
ENSMUSG00000020163	Uqcr11	0.93	329	549	1624	371	594	693.4	532.324	16.5	0.0237958
ENSMUSG00000020284	1810043G02Rik	0.93	13	4	8	1	1	5.4	5.12835	0.483	0.0894444
ENSMUSG00000020621	Rdh14	0.93	24	26	29	13	21	22.6	6.10737	4.1	0.181416
ENSMUSG00000020717	Pecam1	0.93	15	68	21	6	13	24.6	24.8455	3.69	0.15
ENSMUSG00000020741	Cluh	0.93	88	259	146	192	56	148.2	81.1246	18.9	0.12753
ENSMUSG00000020785	Camkk1	0.93	109	1	2	0.2	1	22.64	48.2809	0.372	0.0164311
ENSMUSG00000021116	Eif2s1	0.93	21	19	15	20	13	17.6	3.43511	302	17.1591
ENSMUSG00000021190	Lgmn	0.93	197	90	619	56	17	195.8	245.869	25.2	0.128703
ENSMUSG00000021311	Mtr	0.93	4	34	6	2	7	10.6	13.2212	0.527	0.049717
ENSMUSG00000021359	Tfap2a	0.93	3	0.2	6	0.1	0.4	1.94	2.56866	1.48	0.762887
ENSMUSG00000021417	Eci2	0.93	30	99	58	106	23	63.2	38.2714	38.1	0.602848
ENSMUSG00000021464	Ror2	0.93	2	2	5	0.1	0.5	1.92	1.92536	1.99	1.03646
ENSMUSG00000022022	Mtrf1	0.93	5	8	4	7	7	6.2	1.64317	0.559	0.0901613
ENSMUSG00000022197	Pdzd2	0.93	13	21	6	0.1	3	8.62	8.41855	0.203	0.0235499
ENSMUSG00000022283	Pabpc1	0.93	84	71	64	81	18	63.6	26.7077	98.7	1.55189
ENSMUSG00000022323	Rida	0.93	11	3	317	181	3	103	141.725	177	1.71845
ENSMUSG00000022416	Cacna1i	0.93	61	0.2	0.2	0.1	0.2	12.34	27.2018	0.009	0.000729335
ENSMUSG00000022610	Mapk12	0.93	18	29	18	3	144	42.4	57.5439	1.26	0.029717
ENSMUSG00000022779	Top3b	0.93	18	9	22	8	5	12.4	7.23187	34.2	2.75806
ENSMUSG00000022914	Brwd1	0.93	12	7	4	3	3	5.8	3.83406	0.197	0.0339655
ENSMUSG00000023972	Ptk7	0.93	16	6	11	0.5	0.6	6.82	6.7277	27	3.95894
ENSMUSG00000024050	Wiz	0.93	39	13	15	8	4	15.8	13.6638	5.65	0.357595
ENSMUSG00000024136	Dnase1l2	0.93	6	2	7	2	3	4	2.34521	0.403	0.10075
ENSMUSG00000024300	Myo1f	0.93	2	3	2	2	0.9	1.98	0.742967	1.94	0.979798
ENSMUSG00000024446	Rpp21	0.93	27	11	31	11	22	20.4	9.15423	0.55	0.0269608
ENSMUSG00000024477	Pggt1b	0.93	7	8	5	4	4	5.6	1.81659	0.174	0.0310714
ENSMUSG00000024758	Rtn3	0.93	693	68	113	53	14	188.2	284.408	10.4	0.0552604
ENSMUSG00000025246	Tbl1x	0.93	28	23	12	15	4	16.4	9.39681	1.93	0.117683
ENSMUSG00000025409	Mbd6	0.93	52	30	49	23	13	33.4	16.772	0.599	0.0179341
ENSMUSG00000025701	Alox5	0.93	0.4	15	0.2	0.1	1	3.34	6.52748	0.997	0.298503
ENSMUSG00000025867	Cplx2	0.93	896	3	13	0.3	0.8	182.62	398.825	38.2	0.209178
ENSMUSG00000025967	Eef1b2	0.93	75	54	120	82	69	80	24.6272	716	8.95
ENSMUSG00000026307	Scly	0.93	16	9	78	73	5	36.2	36.1345	61	1.68508
ENSMUSG00000026489	Coq8a	0.93	32	314	97	213	244	180	113.945	22.2	0.123333
ENSMUSG00000026874	Hc	0.93	0.7	2	2	408	0.5	82.64	181.883	21.6	0.261375
ENSMUSG00000026938	Fcna	0.93	0.7	7	2	54	7	14.14	22.4655	48.4	3.42291
ENSMUSG00000027006	Dnajc10	0.93	32	15	12	11	6	15.2	9.93479	33.8	2.22368
ENSMUSG00000027332	Ivd	0.93	66	230	180	104	47	125.4	77.5487	112	0.893142
ENSMUSG00000027429	Sec23b	0.93	24	8	26	28	3	17.8	11.4543	51.7	2.90449
ENSMUSG00000027465	Tbc1d20	0.93	57	34	35	19	20	33	15.3786	2.25	0.0681818
ENSMUSG00000027510	Rbm38	0.93	4	115	3	2	74	39.6	52.1757	1.06	0.0267677
ENSMUSG00000027615	Hps3	0.93	4	3	3	2	1	2.6	1.14018	0.213	0.0819231
ENSMUSG00000027677	Ttc14	0.93	19	6	2	3	2	6.4	7.23187	0.689	0.107656
ENSMUSG00000027931	Npr1	0.93	5	24	31	7	9	15.2	11.5845	0.096	0.00631579
ENSMUSG00000028018	Gstcd	0.93	3	1	3	2	0.4	1.88	1.17132	0.265	0.140957
ENSMUSG00000028085	Gatb	0.93	8	20	18	14	10	14	5.09902	1.48	0.105714
ENSMUSG00000028274	Rngtt	0.93	7	4	2	3	2	3.6	2.07364	23.4	6.5
ENSMUSG00000028565	Nfia	0.93	26	34	11	15	8	18.8	10.895	6.65	0.353723
ENSMUSG00000028741	Mrto4	0.93	20	9	20	15	15	15.8	4.54973	69.5	4.39873
ENSMUSG00000028945	Rheb	0.93	18	11	8	6	7	10	4.84768	8.17	0.817
ENSMUSG00000028977	Casz1	0.93	3	21	7	0.2	8	7.84	7.9955	0.605	0.0771684
ENSMUSG00000028989	Angptl7	0.93	0.6	3	5	0.5	14	4.62	5.56525	1.17	0.253247
ENSMUSG00000029126	Nsg1	0.93	577	5	4	0.3	2	117.66	256.785	0.238	0.00202278
ENSMUSG00000029735	Tpk1	0.93	2	1	23	6	0.3	6.46	9.50568	1.36	0.210526
ENSMUSG00000030104	Edem1	0.93	12	9	22	91	3	27.4	36.2119	0.749	0.0273358
ENSMUSG00000030278	Cidec	0.93	0.3	30	44	4	56	26.86	24.3967	0.253	0.00941921
ENSMUSG00000031010	Usp9x	0.93	37	32	10	17	11	21.4	12.3814	32.4	1.51402
ENSMUSG00000031012	Cask	0.93	17	3	3	4	2	5.8	6.30079	7.53	1.29828
ENSMUSG00000031425	Plp1	0.93	1014	2	1	0.3	0.7	203.6	453.028	127	0.623772
ENSMUSG00000031585	Gtf2e2	0.93	10	8	4	5	4	6.2	2.68328	109	17.5806
ENSMUSG00000031862	Atp13a1	0.93	78	30	65	52	12	47.4	26.5669	3.56	0.0751055
ENSMUSG00000031865	Dctn1	0.93	355	82	57	17	59	114	136.737	66.6	0.584211
ENSMUSG00000032000	Birc3	0.93	2	5	3	5	2	3.4	1.51658	0.154	0.0452941
ENSMUSG00000032050	Rdx	0.93	42	59	31	66	49	49.4	13.7949	282	5.7085
ENSMUSG00000033632	AW554918	0.93	5	2	2	0.6	0.8	2.08	1.75841	0.049	0.0235577
ENSMUSG00000033819	Ppp1r16a	0.93	98	11	56	20	14	39.8	37.2048	0.394	0.0098995
ENSMUSG00000034292	Traf3ip1	0.93	16	6	13	6	4	9	5.19615	1.63	0.181111
ENSMUSG00000034329	Brip1	0.93	0.3	0.2	0.5	0.3	0.2	0.3	0.122474	0.066	0.22
ENSMUSG00000034456	Uroc1	0.93	0.4	0.8	88	442	0.8	106.4	191.38	18.4	0.172932
ENSMUSG00000034911	Ushbp1	0.93	5	31	24	7	10	15.4	11.4586	0.57	0.037013
ENSMUSG00000035293	G2e3	0.93	3	2	0.5	1	0.4	1.38	1.10544	0.006	0.00434783
ENSMUSG00000035296	Sgcg	0.93	0.1	149	0.1	0.3	101	50.1	70.4487	0.372	0.00742515
ENSMUSG00000035575	Utp6	0.93	19	13	12	15	13	14.4	2.79285	13.6	0.944444
ENSMUSG00000036181	Hist1h1c	0.93	37	72	189	81	142	104.2	60.644	411	3.94434
ENSMUSG00000036438	Calm2	0.93	1417	81	164	103	141	381.2	579.929	794	2.0829
ENSMUSG00000036792	Mbd5	0.93	9	3	2	0.7	2	3.34	3.26772	0.13	0.0389222
ENSMUSG00000036864	Proser3	0.93	7	4	7	2	3	4.6	2.30217	0.086	0.0186957
ENSMUSG00000037126	Psd	0.93	583	6	6	2	0.8	119.56	259.081	0.195	0.00163098
ENSMUSG00000037458	Azin1	0.93	38	31	16	23	6	22.8	12.518	0.072	0.00315789
ENSMUSG00000037738	Nek5	0.93	0.6	0.1	2	0.1	0.4	0.64	0.789303	0.003	0.0046875
ENSMUSG00000037972	Snn	0.93	153	16	54	0.6	3	45.32	63.8765	0.047	0.00103707
ENSMUSG00000038069	Cdkn2aip	0.93	10	5	5	5	2	5.4	2.88097	42.9	7.94444
ENSMUSG00000038188	Scarf1	0.93	7	16	11	9	7	10	3.74166	0.056	0.0056
ENSMUSG00000038368	Focad	0.93	9	5	2	3	3	4.4	2.79285	0.33	0.075
ENSMUSG00000038612	Mcl1	0.93	46	106	43	51	59	61	25.8747	2.15	0.0352459
ENSMUSG00000038742	Angptl6	0.93	5	1	5	8	4	4.6	2.50998	0.546	0.118696
ENSMUSG00000039109	F13a1	0.93	2	17	0.7	0.2	8	5.58	7.10366	14.9	2.67025
ENSMUSG00000039840	Epg5	0.93	19	7	4	8	9	9.4	5.68331	0.256	0.027234
ENSMUSG00000039914	Coq10a	0.93	52	240	24	21	180	103.4	100.328	4.38	0.0423598
ENSMUSG00000039953	Clstn1	0.93	1638	75	83	3	12	362.2	714.102	5.31	0.0146604
ENSMUSG00000040054	Baz2a	0.93	35	26	21	14	11	21.4	9.60729	22.7	1.06075
ENSMUSG00000040253	Gbp7	0.93	2	7	2	6	3	4	2.34521	0.532	0.133
ENSMUSG00000040283	Btnl9	0.93	0.2	19	2	2	1	4.84	7.9516	0.34	0.0702479
ENSMUSG00000040563	Plppr2	0.93	379	5	9	9	1	80.6	166.844	0.125	0.00155087
ENSMUSG00000040564	Apoc1	0.93	7	14	92	4655	20	957.6	2067.19	387	0.404135
ENSMUSG00000040877	Wdr25	0.93	6	2	2	1	1	2.4	2.07364	0.003	0.00125
ENSMUSG00000041372	B4galnt3	0.93	0.3	0.2	38	3	0.7	8.44	16.5639	0.004	0.000473934
ENSMUSG00000042548	Asxl1	0.93	31	18	10	9	6	14.8	10.0846	0.042	0.00283784
ENSMUSG00000042870	Tom1	0.93	34	46	30	15	20	29	12.1655	2.51	0.0865517
ENSMUSG00000043099	Hic1	0.93	7	12	13	3	2	7.4	5.02991	1.3	0.175676
ENSMUSG00000043162	Pyurf	0.93	8	11	19	9	9	11.2	4.49444	6.4	0.571429
ENSMUSG00000043257	Pigv	0.93	8	12	12	5	9	9.2	2.94958	0.002	0.000217391
ENSMUSG00000043789	Vwce	0.93	0.9	0.1	15	28	0.1	8.82	12.4586	0.117	0.0132653
ENSMUSG00000045438	Cox19	0.93	23	14	22	11	11	16.2	5.89067	2.13	0.131481
ENSMUSG00000045466	Zfp956	0.93	22	2	4	2	7	7.4	8.41427	0.007	0.000945946
ENSMUSG00000045659	Plekha7	0.93	9	4	19	2	0.3	6.86	7.52981	0.502	0.0731778
ENSMUSG00000046434	Hnrnpa1	0.93	171	94	109	38	67	95.8	50.007	421	4.39457
ENSMUSG00000046691	Chtf8	0.93	100	50	62	42	13	53.4	31.6986	0.209	0.00391386
ENSMUSG00000047473	Zfp30	0.93	7	4	2	1	1	3	2.54951	0.345	0.115
ENSMUSG00000047502	Mroh7	0.93	5	0.4	9	0.1	0.1	2.92	3.98585	0.031	0.0106164
ENSMUSG00000047719	Ubiad1	0.93	11	17	32	9	9	15.6	9.73653	0.088	0.00564103
ENSMUSG00000049076	Acap2	0.93	29	9	5	5	3	10.2	10.7331	18.9	1.85294
ENSMUSG00000050229	Pigm	0.93	5	4	3	4	2	3.6	1.14018	0	0
ENSMUSG00000050310	Rictor	0.93	15	6	3	4	2	6	5.24404	10.1	1.68333
ENSMUSG00000051000	Fam160a1	0.93	3	38	6	3	36	17.2	18.1301	0.184	0.0106977
ENSMUSG00000053470	Kdm3a	0.93	21	11	5	6	4	9.4	7.0214	32.4	3.44681
ENSMUSG00000054364	Rhob	0.93	633	223	95	39	52	208.4	248.251	116	0.556622
ENSMUSG00000054843	Atrnl1	0.93	47	12	11	10	3	16.6	17.358	0.111	0.00668675
ENSMUSG00000055322	Tns1	0.93	21	280	210	27	67	121	117.211	5.69	0.0470248
ENSMUSG00000055493	Epm2a	0.93	22	17	6	3	48	19.2	17.8802	0	0
ENSMUSG00000056737	Capg	0.93	2	7	34	1	9	10.6	13.5019	132	12.4528
ENSMUSG00000057897	Camk2b	0.93	365	5	0.8	4	28	80.56	159.375	90.6	1.12463
ENSMUSG00000061904	Slc25a3	0.93	192	645	383	109	160	297.8	220.02	111	0.372733
ENSMUSG00000062861	Zfp28	0.93	4	2	1	0.6	0.7	1.66	1.42056	0.247	0.148795
ENSMUSG00000063445	Nmral1	0.93	10	1	4	5	1	4.2	3.70135	5.22	1.24286
ENSMUSG00000063663	Brwd3	0.93	2	1	0.8	2	0.5	1.26	0.69857	0.156	0.12381
ENSMUSG00000063694	Cycs	0.93	44	163	90	37	77	82.2	50.2961	566	6.88564
ENSMUSG00000064307	Lrrc51	0.93	9	3	10	3	5	6	3.31662	0.021	0.0035
ENSMUSG00000067336	Bmpr2	0.93	21	16	2	4	6	9.8	8.25833	0.505	0.0515306
ENSMUSG00000068134	Zfp120	0.93	3	2	1	2	2	2	0.707107	55.7	27.85
ENSMUSG00000070436	Serpinh1	0.93	54	349	169	16	84	134.4	132.545	357	2.65625
ENSMUSG00000072623	Zfp9	0.93	13	4	1	2	2	4.4	4.9295	0.018	0.00409091
ENSMUSG00000072969	Armcx5	0.93	10	3	2	1	0.6	3.32	3.84864	0.478	0.143976
ENSMUSG00000073755	5730409E04Rik	0.93	90	15	8	6	25	28.8	35.01	0.318	0.0110417
ENSMUSG00000074824	Rslcan18	0.93	0.1	0.3	0.3	0.2	0.1	0.2	0.1	0.042	0.21
ENSMUSG00000078234	Klhdc7a	0.93	13	4	49	10	3	15.8	19.0184	0.039	0.00246835
ENSMUSG00000079470	Utp14b	0.93	5	0.6	0.6	5	2	2.64	2.2289	0.526	0.199242
ENSMUSG00000087141	Plcxd2	0.93	39	0.3	0.7	28	0.1	13.62	18.5612	0.009	0.000660793
ENSMUSG00000000384	Tbrg4	0.92	37	57	38	37	31	40	9.89949	6.04	0.151
ENSMUSG00000001524	Gtf2h4	0.92	15	8	12	9	9	10.6	2.88097	7.68	0.724528
ENSMUSG00000001552	Jup	0.92	94	238	117	40	33	104.4	82.7061	28.4	0.272031
ENSMUSG00000001588	Acap1	0.92	0.2	1	0.6	0.8	0.4	0.6	0.316228	0.94	1.56667
ENSMUSG00000001604	Tcea3	0.92	1	123	98	88	221	106.2	78.9411	40.7	0.383239
ENSMUSG00000002732	Fkbp7	0.92	3	13	5	3	3	5.4	4.3359	1.16	0.214815
ENSMUSG00000003153	Slc2a3	0.92	62	1	1	0.1	2	13.22	27.2771	168	12.708
ENSMUSG00000003484	Cyp4f18	0.92	0.6	2	1	0.3	0.6	0.9	0.663325	0.465	0.516667
ENSMUSG00000005897	Nr2c1	0.92	7	6	3	6	2	4.8	2.16795	0.28	0.0583333
ENSMUSG00000006307	Kmt2b	0.92	32	18	15	11	10	17.2	8.8713	7.95	0.462209
ENSMUSG00000006423	C330007P06Rik	0.92	12	5	7	6	3	6.6	3.36155	2.94	0.445455
ENSMUSG00000009406	Elk1	0.92	51	9	3	3	5	14.2	20.7171	0.013	0.000915493
ENSMUSG00000015090	Ptgds	0.92	1420	142	8	4	0.2	314.84	620.69	11.3	0.0358912
ENSMUSG00000015217	Hmgb3	0.92	22	47	27	8	5	21.8	16.8434	23.1	1.05963
ENSMUSG00000015568	Lpl	0.92	5	1416	89	5	60	315	616.543	8.75	0.0277778
ENSMUSG00000015733	Capza2	0.92	54	31	15	16	49	33	18.1246	306	9.27273
ENSMUSG00000016252	Atp5e	0.92	63	135	235	78	245	151.2	85.4705	979	6.47487
ENSMUSG00000017405	Nek8	0.92	2	2	10	2	0.5	3.3	3.80132	0.202	0.0612121
ENSMUSG00000018412	Kansl1	0.92	54	23	15	11	8	22.2	18.6467	0.61	0.0274775
ENSMUSG00000018470	Kcnab3	0.92	103	0.9	0.7	0.5	0.1	21.04	45.818	0.274	0.0130228
ENSMUSG00000019872	Smpdl3a	0.92	26	49	327	23	32	91.4	132.088	5.83	0.0637856
ENSMUSG00000019947	Arid5b	0.92	22	15	5	25	5	14.4	9.31665	0.688	0.0477778
ENSMUSG00000020107	Anapc16	0.92	16	12	16	7	11	12.4	3.78153	1.75	0.141129
ENSMUSG00000020122	Egfr	0.92	5	3	8	216	3	47	94.496	63.6	1.35319
ENSMUSG00000020783	Ncbp3	0.92	5	4	2	2	1	2.8	1.64317	19.6	7
ENSMUSG00000020827	Mink1	0.92	305	33	63	38	16	91	120.808	3.96	0.0435165
ENSMUSG00000021108	Prkch	0.92	9	11	4	1	2	5.4	4.39318	0.398	0.0737037
ENSMUSG00000021253	Tgfb3	0.92	22	17	1	1	25	13.2	11.4978	0.005	0.000378788
ENSMUSG00000021420	Fars2	0.92	21	45	42	26	15	29.8	13.1415	1.38	0.0463087
ENSMUSG00000021765	Fst	0.92	2	1	3	2	2	2	0.707107	0.235	0.1175
ENSMUSG00000021911	Parg	0.92	16	7	6	7	5	8.2	4.43847	28.4	3.46341
ENSMUSG00000022100	Xpo7	0.92	18	10	7	10	7	10.4	4.50555	43.2	4.15385
ENSMUSG00000022214	Dcaf11	0.92	27	40	48	82	30	45.4	22.0862	1.51	0.0332599
ENSMUSG00000022555	Dgat1	0.92	29	17	39	18	13	23.2	10.6395	1.2	0.0517241
ENSMUSG00000022770	Dlg1	0.92	34	17	9	9	9	15.6	10.8536	58.5	3.75
ENSMUSG00000022957	Itsn1	0.92	34	9	3	4	7	11.4	12.8569	6.2	0.54386
ENSMUSG00000024097	Srsf7	0.92	57	28	34	18	12	29.8	17.4413	148	4.96644
ENSMUSG00000024104	Washc2	0.92	88	16	33	25	14	35.2	30.4746	53.2	1.51136
ENSMUSG00000024142	Mlst8	0.92	44	12	11	7	11	17	15.2151	3.75	0.220588
ENSMUSG00000024287	Thoc1	0.92	24	10	8	10	5	11.4	7.33485	37.2	3.26316
ENSMUSG00000024302	Dtna	0.92	53	18	1	0.2	17	17.84	21.3993	0.708	0.0396861
ENSMUSG00000024589	Nedd4l	0.92	53	12	18	15	6	20.8	18.5391	3.17	0.152404
ENSMUSG00000024921	Smarca2	0.92	117	28	39	28	12	44.8	41.4934	5.64	0.125893
ENSMUSG00000025102	3110040N11Rik	0.92	15	9	30	11	8	14.6	9.01665	1.38	0.0945205
ENSMUSG00000025439	Clns1a	0.92	68	20	23	21	20	30.4	21.0547	13	0.427632
ENSMUSG00000025781	Atp5c1	0.92	195	636	446	219	326	364.4	181.478	316	0.867179
ENSMUSG00000025894	Aasdhppt	0.92	12	13	7	14	5	10.2	3.96232	0.89	0.0872549
ENSMUSG00000026193	Fn1	0.92	31	43	13	482	20	117.8	203.911	339	2.87776
ENSMUSG00000026466	Tor1aip1	0.92	22	56	21	22	31	30.4	14.8762	15.8	0.519737
ENSMUSG00000027199	Gatm	0.92	71	2	395	5	1	94.8	170.412	28.8	0.303797
ENSMUSG00000027474	Ccm2l	0.92	6	24	11	4	7	10.4	8.01873	0.506	0.0486538
ENSMUSG00000027508	Pag1	0.92	11	3	2	2	1	3.8	4.08656	0.907	0.238684
ENSMUSG00000027859	Ngf	0.92	6	7	8	4	0.4	5.08	3.00533	0.221	0.0435039
ENSMUSG00000028643	Svbp	0.92	14	13	32	8	12	15.8	9.33809	0.205	0.0129747
ENSMUSG00000028798	Eif3i	0.92	46	25	66	38	32	41.4	15.7734	186	4.49275
ENSMUSG00000028886	Eya3	0.92	18	19	10	9	6	12.4	5.77062	0.744	0.06
ENSMUSG00000029076	Sdf4	0.92	116	27	54	39	29	53	36.8035	5.69	0.107358
ENSMUSG00000029111	Nelfa	0.92	18	7	8	6	3	8.4	5.68331	59.6	7.09524
ENSMUSG00000029128	Rab28	0.92	46	50	19	13	51	35.8	18.2948	0.423	0.0118156
ENSMUSG00000029600	Rita1	0.92	31	7	8	5	5	11.2	11.1445	0.164	0.0146429
ENSMUSG00000029622	Arpc1b	0.92	11	21	28	15	10	17	7.51665	30.2	1.77647
ENSMUSG00000029863	Casp2	0.92	6	4	4	2	1	3.4	1.94936	0.941	0.276765
ENSMUSG00000030008	Pradc1	0.92	12	6	15	5	8	9.2	4.20714	0.497	0.0540217
ENSMUSG00000030037	Mrpl53	0.92	1	1	1	0.2	0.5	0.74	0.371484	14.9	20.1351
ENSMUSG00000030087	Klf15	0.92	37	43	87	147	22	67.2	50.7464	0.424	0.00630952
ENSMUSG00000030469	Zfp719	0.92	5	2	1	1	1	2	1.73205	0.008	0.004
ENSMUSG00000030470	Csrp3	0.92	1	1243	0.2	22	42	261.64	548.867	97.4	0.372267
ENSMUSG00000031065	Cdk16	0.92	329	131	70	21	91	128.4	118.945	1.43	0.0111371
ENSMUSG00000031168	Ebp	0.92	18	11	84	172	6	58.2	71.0366	18.8	0.323024
ENSMUSG00000031198	Fundc2	0.92	12	38	16	2	53	24.2	20.7894	8.6	0.355372
ENSMUSG00000031444	F10	0.92	0.6	0.9	5	472	0.8	95.86	210.277	112	1.16837
ENSMUSG00000031451	Gas6	0.92	189	165	495	49	64	192.4	179.847	0.317	0.00164761
ENSMUSG00000031609	Sap30	0.92	6	9	58	3	6	16.4	23.3517	2.58	0.157317
ENSMUSG00000031672	Got2	0.92	430	1132	306	557	291	543.2	346.251	486	0.894698
ENSMUSG00000031709	Tbc1d9	0.92	77	2	3	0.3	0.9	16.64	33.7582	0.024	0.00144231
ENSMUSG00000031922	Cep57	0.92	6	3	5	4	1	3.8	1.92354	0.304	0.08
ENSMUSG00000032182	Yipf2	0.92	27	7	14	19	6	14.6	8.73499	0.221	0.015137
ENSMUSG00000032295	Man2c1	0.92	40	15	29	11	8	20.6	13.5019	1.08	0.0524272
ENSMUSG00000032591	Mst1	0.92	1	0.5	2	203	0.3	41.36	90.3619	22.2	0.53675
ENSMUSG00000032691	Nlrp3	0.92	0.7	0.3	0.6	0.7	0.1	0.48	0.268328	0.498	1.0375
ENSMUSG00000032872	Cyb5r4	0.92	12	9	8	10	6	9	2.23607	0.177	0.0196667
ENSMUSG00000032911	Cspg4	0.92	17	16	13	0.1	3	9.82	7.75964	1.02	0.10387
ENSMUSG00000033161	Atp1a1	0.92	942	981	2460	292	42	943.4	940.523	175	0.185499
ENSMUSG00000034032	Rpap1	0.92	20	13	6	7	10	11.2	5.63028	13.5	1.20536
ENSMUSG00000034278	Dnajc17	0.92	14	6	7	5	6	7.6	3.64692	3.8	0.5
ENSMUSG00000034471	Caskin2	0.92	35	51	45	12	9	30.4	19.0735	0.238	0.00782895
ENSMUSG00000034951	Cog7	0.92	78	29	35	23	9	34.8	26.0038	1	0.0287356
ENSMUSG00000034981	Parm1	0.92	47	83	7	0.2	12	29.84	34.7811	1.36	0.0455764
ENSMUSG00000035890	Rnf126	0.92	282	42	79	69	44	103.2	101.211	118	1.14341
ENSMUSG00000035944	Ttc38	0.92	7	18	30	55	4	22.8	20.7051	4.88	0.214035
ENSMUSG00000036054	Sugp2	0.92	26	8	4	2	8	9.6	9.5289	1.7	0.177083
ENSMUSG00000036617	Etl4	0.92	24	12	3	2	6	9.4	9.04434	8	0.851064
ENSMUSG00000036748	Cuedc2	0.92	185	35	47	16	41	64.8	68.1924	92.3	1.42438
ENSMUSG00000036775	Decr2	0.92	47	22	63	145	4	56.2	54.5683	42.9	0.763345
ENSMUSG00000037005	Xpnpep2	0.92	0.1	1	6	0.2	0.7	1.6	2.48697	0.375	0.234375
ENSMUSG00000037172	E330009J07Rik	0.92	29	2	2	3	0.5	7.3	12.1635	0.123	0.0168493
ENSMUSG00000037754	Ppp1r16b	0.92	94	6	17	1	1	23.8	39.7832	0.38	0.0159664
ENSMUSG00000038241	Cep250	0.92	12	3	11	2	3	6.2	4.86826	0.402	0.0648387
ENSMUSG00000038604	Ripor1	0.92	118	74	54	10	16	54.4	44.3712	0.486	0.00893382
ENSMUSG00000039145	Camk1d	0.92	48	3	0.9	22	0.8	14.94	20.5087	28.3	1.89424
ENSMUSG00000039452	Snx22	0.92	25	2	4	3	0.7	6.94	10.1695	0.113	0.0162824
ENSMUSG00000039496	Cdnf	0.92	0.5	15	0.1	0.2	30	9.16	13.2832	0.836	0.0912664
ENSMUSG00000039640	Mrpl12	0.92	118	142	254	131	115	152	58.0302	158	1.03947
ENSMUSG00000040028	Elavl1	0.92	61	34	17	20	10	28.4	20.2064	98.2	3.45775
ENSMUSG00000040258	Nxph4	0.92	59	0.7	6	0.2	0.3	13.24	25.696	0.01	0.000755287
ENSMUSG00000040511	Pvr	0.92	4	18	4	4	4	6.8	6.26099	3.24	0.476471
ENSMUSG00000041479	Syt15	0.92	0.2	0.6	0.9	0.3	0.5	0.5	0.273861	0.049	0.098
ENSMUSG00000041515	Irf8	0.92	3	2	7	3	2	3.4	2.07364	1.13	0.332353
ENSMUSG00000041809	Efhc1	0.92	2	0.5	1	0.1	0.2	0.76	0.776531	0.533	0.701316
ENSMUSG00000041836	Ptpre	0.92	24	4	1	0.8	0.8	6.12	10.0872	0.443	0.0723856
ENSMUSG00000042055	Wdr11	0.92	12	7	7	7	4	7.4	2.88097	21.6	2.91892
ENSMUSG00000042190	Cmklr1	0.92	5	25	5	3	11	9.8	9.0111	0.394	0.0402041
ENSMUSG00000042719	Naa25	0.92	10	6	2	4	5	5.4	2.96648	22.6	4.18519
ENSMUSG00000042992	Borcs5	0.92	44	13	13	13	13	19.2	13.8636	1.1	0.0572917
ENSMUSG00000044017	Adgrd1	0.92	2	6	2	0.4	3	2.68	2.07654	0.003	0.0011194
ENSMUSG00000044339	Alkbh2	0.92	4	2	6	9	0.9	4.38	3.23605	0.52	0.118721
ENSMUSG00000044393	Dsg2	0.92	1	30	3	32	0.1	13.22	16.2801	1.95	0.147504
ENSMUSG00000044952	Kctd21	0.92	32	7	6	10	3	11.6	11.6748	0.43	0.037069
ENSMUSG00000046207	Pik3r6	0.92	4	5	2	0.8	1	2.56	1.86226	0.027	0.0105469
ENSMUSG00000046417	Lrrc75a	0.92	20	6	4	2	4	7.2	7.29383	0.021	0.00291667
ENSMUSG00000047238	Mageh1	0.92	51	6	8	3	3	14.2	20.6809	0.674	0.0474648
ENSMUSG00000047654	Tssk6	0.92	0.6	0.7	3	0.6	0.3	1.04	1.10589	0.014	0.0134615
ENSMUSG00000048200	Cracr2b	0.92	5	10	10	2	4	6.2	3.63318	0.562	0.0906452
ENSMUSG00000048874	Phf3	0.92	15	6	8	6	4	7.8	4.26615	1.26	0.161538
ENSMUSG00000049103	Ccr2	0.92	0.1	0.6	0.7	0.3	0.4	0.42	0.238747	0.339	0.807143
ENSMUSG00000050846	Zfp623	0.92	17	6	14	14	4	11	5.65685	0.015	0.00136364
ENSMUSG00000050965	Prkca	0.92	54	11	2	2	15	16.8	21.5569	8.31	0.494643
ENSMUSG00000051037	Zfp455	0.92	1	0.4	0.1	0.7	0.2	0.48	0.370135	0.017	0.0354167
ENSMUSG00000051730	Mettl5	0.92	6	7	7	7	4	6.2	1.30384	0.06	0.00967742
ENSMUSG00000051768	Xrcc1	0.92	49	18	37	14	14	26.4	15.8209	77	2.91667
ENSMUSG00000051978	Erich1	0.92	9	5	2	3	1	4	3.16228	0.079	0.01975
ENSMUSG00000052928	Ctif	0.92	66	8	9	16	5	20.8	25.5871	0.429	0.020625
ENSMUSG00000054874	Pcnx3	0.92	55	15	41	22	8	28.2	19.383	0.07	0.00248227
ENSMUSG00000055980	Irs1	0.92	7	13	2	5	27	10.8	9.90959	0.807	0.0747222
ENSMUSG00000057672	Pkn1	0.92	12	14	15	6	7	10.8	4.08656	20.3	1.87963
ENSMUSG00000058454	Dhcr7	0.92	44	9	33	114	5	41	43.9375	15	0.365854
ENSMUSG00000059149	Mfsd4a	0.92	18	12	17	7	8	12.4	5.02991	0.048	0.00387097
ENSMUSG00000059173	Pde1a	0.92	55	2	13	0.3	0.6	14.18	23.4152	2.04	0.143865
ENSMUSG00000059486	Kbtbd2	0.92	30	16	8	9	7	14	9.61769	0.094	0.00671429
ENSMUSG00000059772	Slx1b	0.92	16	4	9	4	3	7.2	5.44977	0.037	0.00513889
ENSMUSG00000060036	Rpl3	0.92	223	52	242	122	20	131.8	99.2784	1076	8.16388
ENSMUSG00000061100	Retnla	0.92	1	14	12	0.5	71	19.7	29.3334	4.53	0.229949
ENSMUSG00000062619	2310039H08Rik	0.92	4	8	188	46	23	53.8	76.8062	4.6	0.0855019
ENSMUSG00000063800	Prpf38a	0.92	7	3	3	3	2	3.6	1.94936	7.52	2.08889
ENSMUSG00000067279	Ppp1r3c	0.92	35	83	3	37	323	96.2	129.951	0.103	0.00107069
ENSMUSG00000067567	Hdac8	0.92	9	2	2	2	2	3.4	3.1305	4.8	1.41176
ENSMUSG00000068011	Mkrn2os	0.92	2	0.1	8	13	0.4	4.7	5.6285	0.043	0.00914894
ENSMUSG00000069049	Eif2s3y	0.92	9	11	4	7	4	7	3.08221	220	31.4286
ENSMUSG00000070509	Rgma	0.92	110	67	7	0.2	24	41.64	46.2185	0.126	0.00302594
ENSMUSG00000070806	Zmynd12	0.92	0.6	0.1	2	0.1	0.1	0.58	0.8228	0.669	1.15345
ENSMUSG00000075232	Amd1	0.92	44	52	7	13	167	56.6	64.6707	1.18	0.0208481
ENSMUSG00000001052	Sec24b	0.91	37	22	16	9	9	18.6	11.6319	3.76	0.202151
ENSMUSG00000002017	Fam98a	0.91	24	25	20	18	30	23.4	4.66905	49.8	2.12821
ENSMUSG00000003812	Dnase2a	0.91	6	3	4	7	2	4.4	2.07364	2.36	0.536364
ENSMUSG00000004788	Eif2b2	0.91	74	24	54	33	44	45.8	19.3959	102	2.22707
ENSMUSG00000004952	Rasa4	0.91	7	3	5	0.7	14	5.94	5.07622	0.321	0.0540404
ENSMUSG00000005057	Sh2b2	0.91	5	1	2	1	2	2.2	1.64317	0.632	0.287273
ENSMUSG00000005774	Rfx5	0.91	11	3	5	4	2	5	3.53553	1.65	0.33
ENSMUSG00000005881	Ergic3	0.91	224	48	183	116	41	122.4	80.9277	5.1	0.0416667
ENSMUSG00000006169	Clint1	0.91	26	23	26	19	7	20.2	7.91833	109	5.39604
ENSMUSG00000006589	Aprt	0.91	74	21	217	72	30	82.8	78.7572	50	0.603865
ENSMUSG00000014905	Dnajb9	0.91	39	42	15	78	13	37.4	26.3116	0.474	0.0126738
ENSMUSG00000015002	Efr3a	0.91	28	15	6	8	5	12.4	9.5551	2.94	0.237097
ENSMUSG00000015092	Edf1	0.91	161	100	269	133	91	150.8	71.6743	229	1.51857
ENSMUSG00000018381	Abi3	0.91	1	3	2	1	0.8	1.56	0.931665	0.868	0.55641
ENSMUSG00000019087	Atp6ap1	0.91	369	134	182	67	73	165	123.424	8.81	0.0533939
ENSMUSG00000019143	Hars2	0.91	12	12	18	12	6	12	4.24264	2.85	0.2375
ENSMUSG00000019689	Fmc1	0.91	43	52	137	41	56	65.8	40.2828	3.6	0.0547112
ENSMUSG00000019899	Lama2	0.91	2	21	2	0.1	4	5.82	8.59721	1.45	0.249141
ENSMUSG00000020609	Apob	0.91	0.3	3	11	795	1	162.06	353.85	14.7	0.0907071
ENSMUSG00000020650	Bcap29	0.91	34	26	6	7	13	17.2	12.3167	2.26	0.131395
ENSMUSG00000020723	Cacng4	0.91	69	0.2	0.1	0.3	0.3	13.98	30.7572	0.04	0.00286123
ENSMUSG00000020744	Slc25a19	0.91	33	16	50	6	18	24.6	17.1697	0.839	0.0341057
ENSMUSG00000021364	Elovl2	0.91	11	0.8	30	334	0.4	75.24	145.149	12.4	0.164806
ENSMUSG00000021583	Erap1	0.91	5	19	8	34	5	14.2	12.478	8.77	0.617606
ENSMUSG00000021619	Atg10	0.91	7	14	3	4	4	6.4	4.50555	0.009	0.00140625
ENSMUSG00000021638	Ocln	0.91	4	0.3	12	6	0.1	4.48	4.89255	0.77	0.171875
ENSMUSG00000021760	Gpx8	0.91	9	18	22	1	9	11.8	8.28855	0.321	0.0272034
ENSMUSG00000021786	Oxsm	0.91	6	14	10	15	5	10	4.52769	22.9	2.29
ENSMUSG00000021939	Ctsb	0.91	340	229	285	261	105	244	87.6527	222	0.909836
ENSMUSG00000021957	Tkt	0.91	129	26	131	62	22	74	53.4462	1717	23.2027
ENSMUSG00000022231	Sema5a	0.91	14	4	5	0.2	0.6	4.76	5.57028	0.107	0.022479
ENSMUSG00000022253	Nadk2	0.91	24	28	23	55	8	27.6	17.0968	36.3	1.31522
ENSMUSG00000022299	Slc25a32	0.91	6	5	3	6	3	4.6	1.51658	1.76	0.382609
ENSMUSG00000022885	St6gal1	0.91	18	10	7	70	2	21.4	27.7813	0.52	0.0242991
ENSMUSG00000023345	Poc1a	0.91	13	4	3	2	1	4.6	4.82701	0.207	0.045
ENSMUSG00000023830	Igf2r	0.91	16	78	34	11	22	32.2	27.0037	3.15	0.0978261
ENSMUSG00000024083	Pja2	0.91	229	75	14	13	27	71.6	91.5522	0.327	0.00456704
ENSMUSG00000024312	Wdr46	0.91	12	7	28	18	7	14.4	8.84873	24.6	1.70833
ENSMUSG00000024378	Stard4	0.91	10	3	16	40	1	14	15.7003	0.332	0.0237143
ENSMUSG00000024381	Bin1	0.91	557	12	27	22	671	257.8	327.698	22.9	0.0888285
ENSMUSG00000024525	Impa2	0.91	6	25	16	3	3	10.6	9.65919	0.508	0.0479245
ENSMUSG00000024924	Vldlr	0.91	18	69	10	0.6	35	26.52	26.8971	0.489	0.0184389
ENSMUSG00000025041	Nt5c2	0.91	38	19	22	6	2	17.4	14.2759	8.84	0.508046
ENSMUSG00000025050	Pcgf6	0.91	10	3	7	7	3	6	3	51.8	8.63333
ENSMUSG00000025232	Hexa	0.91	77	48	59	37	45	53.2	15.4661	55.5	1.04323
ENSMUSG00000025572	Tmc6	0.91	5	9	37	5	3	11.8	14.2548	1	0.0847458
ENSMUSG00000025791	Pgm2	0.91	100	201	78	178	842	279.8	318.47	195	0.696926
ENSMUSG00000026171	Rnf25	0.91	67	12	33	20	19	30.2	21.9249	0.48	0.015894
ENSMUSG00000026288	Inpp5d	0.91	8	4	5	2	1	4	2.73861	11	2.75
ENSMUSG00000026790	Odf2	0.91	27	6	7	2	3	9	10.2713	7.37	0.818889
ENSMUSG00000027086	Fastkd1	0.91	5	14	7	8	4	7.6	3.91152	0.252	0.0331579
ENSMUSG00000028247	Coq3	0.91	9	22	11	11	11	12.8	5.21536	7.68	0.6
ENSMUSG00000028524	Sgip1	0.91	43	0.7	2	0.4	0.8	9.38	18.804	4.7	0.501066
ENSMUSG00000028581	Laptm5	0.91	40	25	12	13	6	19.2	13.5167	0.172	0.00895833
ENSMUSG00000028923	Necap2	0.91	39	13	50	6	9	23.4	19.8066	77.8	3.32479
ENSMUSG00000029267	Mtf2	0.91	14	4	3	1	2	4.8	5.26308	30.6	6.375
ENSMUSG00000029452	Tmem116	0.91	2	2	33	0.2	0.6	7.56	14.2446	0.001	0.000132275
ENSMUSG00000029591	Ung	0.91	3	13	2	4	3	5	4.52769	45	9
ENSMUSG00000029629	Phf14	0.91	13	11	6	7	5	8.4	3.43511	2.38	0.283333
ENSMUSG00000029726	Mepce	0.91	74	37	38	22	18	37.8	22.0952	41.2	1.08995
ENSMUSG00000030022	Adamts9	0.91	1	5	4	0.2	2	2.44	2.01693	0.151	0.0618852
ENSMUSG00000030220	Arhgdib	0.91	14	23	31	8	8	16.8	10.0349	124	7.38095
ENSMUSG00000030650	Tmc5	0.91	0.2	0.6	0.8	0.2	0.2	0.4	0.282843	0	0
ENSMUSG00000030768	Disp1	0.91	9	10	3	2	3	5.4	3.78153	0.769	0.142407
ENSMUSG00000031207	Msn	0.91	19	103	43	8	9	36.4	39.8095	280	7.69231
ENSMUSG00000031232	Magt1	0.91	10	21	19	30	9	17.8	8.64292	5.24	0.294382
ENSMUSG00000031506	Ptpn7	0.91	0.6	0.6	0.3	0.1	0.2	0.36	0.230217	1.19	3.30556
ENSMUSG00000031618	Nr3c2	0.91	21	9	3	4	2	7.8	7.85493	0.172	0.0220513
ENSMUSG00000031960	Aars	0.91	81	24	31	96	23	51	34.7779	17.2	0.337255
ENSMUSG00000031994	Adamts8	0.91	4	3	0.9	0.1	1	1.8	1.62942	0.07	0.0388889
ENSMUSG00000032187	Smarca4	0.91	135	55	47	34	23	58.8	44.3193	40.7	0.692177
ENSMUSG00000032370	Lactb	0.91	15	16	43	35	9	23.6	14.5877	14.6	0.618644
ENSMUSG00000032485	Scap	0.91	68	14	45	56	6	37.8	26.7993	0.304	0.00804233
ENSMUSG00000032491	Nradd	0.91	3	1	11	1	1	3.4	4.3359	1.01	0.297059
ENSMUSG00000032594	Ip6k1	0.91	144	23	26	20	12	45	55.5878	2.16	0.048
ENSMUSG00000033577	Myo6	0.91	30	4	41	12	2	17.8	17.0353	14.5	0.814607
ENSMUSG00000033684	Qsox1	0.91	18	16	11	280	5	66	119.735	54.7	0.828788
ENSMUSG00000033938	Ndufb7	0.91	28	54	97	21	57	51.4	29.955	63.4	1.23346
ENSMUSG00000034648	Lrrn1	0.91	63	0.6	3	0.1	2	13.74	27.561	0.008	0.000582242
ENSMUSG00000035275	Raver2	0.91	11	3	0.3	0.1	0.7	3.02	4.60945	0.333	0.110265
ENSMUSG00000035629	Rubcn	0.91	52	20	10	8	16	21.2	17.8662	0.768	0.0362264
ENSMUSG00000036103	Colec12	0.91	7	10	11	26	3	11.4	8.73499	0.471	0.0413158
ENSMUSG00000036120	Rfxank	0.91	15	16	17	18	5	14.2	5.26308	0.187	0.013169
ENSMUSG00000036214	Znrd1as	0.91	3	7	7	6	7	6	1.73205	0.486	0.081
ENSMUSG00000036395	Glb1l2	0.91	0.2	1	40	0.1	3	8.86	17.4467	0.701	0.0791196
ENSMUSG00000036561	Ppp6r2	0.91	157	67	25	32	71	70.4	52.5528	0.454	0.00644886
ENSMUSG00000036905	C1qb	0.91	144	65	60	104	42	83	40.9145	97.3	1.17229
ENSMUSG00000037851	Iars	0.91	38	42	17	27	26	30	10.025	10.9	0.363333
ENSMUSG00000038250	Usp38	0.91	15	14	5	10	8	10.4	4.15933	10.9	1.04808
ENSMUSG00000038679	Trps1	0.91	5	1	4	0.1	1	2.22	2.1429	0.732	0.32973
ENSMUSG00000038845	Phb	0.91	60	87	133	49	58	77.4	34.1658	172	2.22222
ENSMUSG00000038954	Supt3	0.91	4	4	5	2	3	3.6	1.14018	0.636	0.176667
ENSMUSG00000039428	Tmem135	0.91	25	27	22	29	5	21.6	9.63328	1.39	0.0643519
ENSMUSG00000039473	Ubn1	0.91	31	16	17	13	21	19.6	6.9857	0.744	0.0379592
ENSMUSG00000039783	Kmo	0.91	0.3	0.7	35	114	0.4	30.08	49.2385	12.9	0.428856
ENSMUSG00000040021	Lats1	0.91	17	9	7	11	4	9.6	4.87852	0.124	0.0129167
ENSMUSG00000040174	Alkbh3	0.91	6	13	10	9	11	9.8	2.58844	0.428	0.0436735
ENSMUSG00000040552	C3ar1	0.91	0.7	3	0.4	2	1	1.42	1.06864	0.315	0.221831
ENSMUSG00000040667	Nup88	0.91	15	13	8	8	6	10	3.80789	48.1	4.81
ENSMUSG00000040843	Tiprl	0.91	18	9	8	5	5	9	5.33854	59.1	6.56667
ENSMUSG00000041028	Ghitm	0.91	240	254	219	141	133	197.4	56.5977	7.3	0.0369807
ENSMUSG00000041115	Iqsec2	0.91	137	31	29	5	5	41.4	54.889	8.18	0.197585
ENSMUSG00000041313	Slc7a1	0.91	26	30	4	0.3	1	12.26	14.5048	2.5	0.203915
ENSMUSG00000042390	Gatad2b	0.91	20	12	5	4	8	9.8	6.49615	37.3	3.80612
ENSMUSG00000042408	Zmym6	0.91	12	5	3	2	1	4.6	4.39318	0.146	0.0317391
ENSMUSG00000042659	Arrdc4	0.91	5	6	6	6	4	5.4	0.894427	0.346	0.0640741
ENSMUSG00000042784	Muc1	0.91	0.6	1	29	0.8	0.8	6.44	12.6122	1.22	0.189441
ENSMUSG00000042814	Mcts2	0.91	6	6	15	4	5	7.2	4.43847	7.08	0.983333
ENSMUSG00000045005	Fzd5	0.91	1	3	4	3	0.6	2.32	1.45327	0.196	0.0844828
ENSMUSG00000045007	Tubg2	0.91	121	4	1	0.3	2	25.66	53.3149	4.64	0.180826
ENSMUSG00000045268	Zfp691	0.91	9	28	15	11	18	16.2	7.46324	0.35	0.0216049
ENSMUSG00000045316	Fahd1	0.91	18	60	169	60	34	68.2	59.1287	87.4	1.28152
ENSMUSG00000045441	Gprin3	0.91	3	0.2	0.8	4	0.1	1.62	1.77257	1.41	0.87037
ENSMUSG00000046785	Epm2aip1	0.91	43	15	4	7	6	15	16.2019	2.45	0.163333
ENSMUSG00000047747	Rnf150	0.91	25	14	1	0.3	16	11.26	10.5375	0	0
ENSMUSG00000049106	Dcaf5	0.91	50	25	12	18	23	25.6	14.5362	0.463	0.0180859
ENSMUSG00000049659	Aftph	0.91	30	7	18	11	3	13.8	10.616	22.7	1.64493
ENSMUSG00000049939	Lrrc4	0.91	93	0.8	0.1	0.3	0.6	18.96	41.3905	0.054	0.0028481
ENSMUSG00000050071	Bex1	0.91	46	0.7	3	0.1	12	12.36	19.4014	0.039	0.00315534
ENSMUSG00000050174	Nudt6	0.91	2	10	9	4	7	6.4	3.36155	0.625	0.0976562
ENSMUSG00000051346	Spryd4	0.91	11	26	18	33	23	22.2	8.28855	10.9	0.490991
ENSMUSG00000051403	Ppp1r37	0.91	286	74	92	90	49	118.2	95.3688	0.478	0.00404399
ENSMUSG00000054027	Nt5dc3	0.91	133	63	7	12	55	54	50.7346	20.5	0.37963
ENSMUSG00000054065	Pkp3	0.91	1	0.4	25	0.8	0.3	5.5	10.9046	1.81	0.329091
ENSMUSG00000054342	Kcnn4	0.91	0.2	0.5	0.2	0.2	0.3	0.28	0.130384	0.125	0.446429
ENSMUSG00000055805	Fmnl1	0.91	178	17	48	0.9	3	49.38	74.3217	3.61	0.0731065
ENSMUSG00000059263	Usp47	0.91	39	53	25	30	99	49.2	29.8027	14.2	0.288618
ENSMUSG00000059708	Akap17b	0.91	6	3	1	3	1	2.8	2.04939	0.261	0.0932143
ENSMUSG00000062980	Cped1	0.91	1	6	2	10	3	4.4	3.64692	0.051	0.0115909
ENSMUSG00000064127	Med14	0.91	32	13	6	4	5	12	11.726	1.12	0.0933333
ENSMUSG00000064284	Cdpf1	0.91	16	10	34	9	23	18.4	10.3586	0.078	0.00423913
ENSMUSG00000064289	Tank	0.91	10	7	2	7	2	5.6	3.50714	1.57	0.280357
ENSMUSG00000067158	Col4a4	0.91	0.3	4	50	0.1	0.5	10.98	21.8721	1.01	0.0919854
ENSMUSG00000067818	Myl9	0.91	40	81	251	13	49	86.8	94.9484	81.1	0.934332
ENSMUSG00000068566	Myadm	0.91	77	274	31	25	26	86.6	106.969	6.37	0.0735566
ENSMUSG00000068798	Rap1a	0.91	26	27	18	24	19	22.8	4.08656	60	2.63158
ENSMUSG00000070691	Runx3	0.91	0.2	0.9	2	0.2	0.1	0.68	0.804363	1.01	1.48529
ENSMUSG00000072825	Cep170b	0.91	248	10	52	22	8	68	102.147	3.36	0.0494118
ENSMUSG00000073125	Xlr3b	0.91	0.7	0.3	1	0.2	0.2	0.48	0.356371	44.7	93.125
ENSMUSG00000073676	Hspe1	0.91	46	34	74	74	31	51.8	21.0286	1614	31.1583
ENSMUSG00000074643	Cpne1	0.91	1	1	2	0.1	0.3	0.88	0.746324	22.1	25.1136
ENSMUSG00000096145	Vkorc1	0.91	40	13	108	197	8	73.2	79.8668	11.4	0.155738
ENSMUSG00000001630	Stk38l	0.9	15	10	7	11	6	9.8	3.56371	2.04	0.208163
ENSMUSG00000001785	Pwp1	0.9	13	11	9	12	12	11.4	1.51658	48.2	4.22807
ENSMUSG00000002064	Sdf2	0.9	32	22	78	21	31	36.8	23.5733	12.4	0.336957
ENSMUSG00000002250	Ppard	0.9	38	27	33	18	19	27	8.68907	0.005	0.000185185
ENSMUSG00000002319	Ipo4	0.9	80	32	24	25	23	36.8	24.407	51	1.38587
ENSMUSG00000002728	Naa20	0.9	12	13	12	4	11	10.4	3.64692	12.8	1.23077
ENSMUSG00000002778	Kdelr1	0.9	96	128	157	108	50	107.8	39.714	3.92	0.0363636
ENSMUSG00000002985	Apoe	0.9	2338	278	690	15510	152	3793.6	6607.68	597	0.15737
ENSMUSG00000005225	Plekha8	0.9	6	4	5	8	1	4.8	2.58844	0.737	0.153542
ENSMUSG00000005397	Nid1	0.9	8	85	18	6	19	27.2	32.8283	10.2	0.375
ENSMUSG00000005628	Tmod4	0.9	0.5	9	0.6	0.7	345	71.16	153.124	0.571	0.00802417
ENSMUSG00000007379	Dennd2c	0.9	0.2	1	0.4	0.2	1	0.56	0.409878	0.175	0.3125
ENSMUSG00000007603	Dus3l	0.9	179	33	51	27	20	62	66.4078	1.12	0.0180645
ENSMUSG00000008822	Acyp1	0.9	14	3	17	3	15	10.4	6.84105	22.3	2.14423
ENSMUSG00000009092	Derl3	0.9	6	1	3	14	0.5	4.9	5.52721	0.118	0.0240816
ENSMUSG00000009207	Lnpk	0.9	9	3	0.2	0.6	3	3.16	3.51682	29.5	9.33544
ENSMUSG00000010307	Tmem86a	0.9	38	24	85	8	3	31.6	32.8831	0.073	0.00231013
ENSMUSG00000013033	Adgrl1	0.9	333	16	14	2	13	75.6	143.994	1.37	0.0181217
ENSMUSG00000013622	Atraid	0.9	82	43	238	89	63	103	77.5597	0.613	0.00595146
ENSMUSG00000013663	Pten	0.9	37	22	11	25	8	20.6	11.6319	44	2.13592
ENSMUSG00000015944	Castor2	0.9	96	21	31	2	26	35.2	35.7169	0.65	0.0184659
ENSMUSG00000016554	Eif3d	0.9	99	61	71	93	45	73.8	22.3875	185	2.50678
ENSMUSG00000017286	Glod4	0.9	12	6	11	8	3	8	3.67423	150	18.75
ENSMUSG00000018339	Gpx3	0.9	49	675	33283	11	306	6864.8	14770.6	154	0.0224333
ENSMUSG00000019846	Lama4	0.9	2	24	1	0.6	4	6.32	9.97056	1.03	0.162975
ENSMUSG00000019984	Med23	0.9	19	11	4	4	3	8.2	6.83374	12.2	1.4878
ENSMUSG00000020072	Pbld2	0.9	1	1	90	127	1	44	60.3158	14.3	0.325
ENSMUSG00000020135	Apc2	0.9	95	4	0.7	0.1	0.2	20	41.9569	6.65	0.3325
ENSMUSG00000020335	Zfp354b	0.9	1	0.9	0.4	0.9	0.7	0.78	0.238747	1.13	1.44872
ENSMUSG00000020349	Ppp2ca	0.9	94	40	22	30	22	41.6	30.2126	38.8	0.932692
ENSMUSG00000020409	Slu7	0.9	30	13	16	10	11	16	8.15475	23	1.4375
ENSMUSG00000020447	Npc1l1	0.9	2	0.6	0.4	0.2	2	1.04	0.887694	0.11	0.105769
ENSMUSG00000020620	Abca8b	0.9	6	5	0.7	18	5	6.94	6.51291	0.114	0.0164265
ENSMUSG00000020674	Pxdn	0.9	19	31	6	2	4	12.4	12.341	2.25	0.181452
ENSMUSG00000020755	Sap30bp	0.9	47	9	22	11	8	19.4	16.4104	82.8	4.26804
ENSMUSG00000021007	Spata7	0.9	7	2	3	0.3	0.5	2.56	2.71901	0.101	0.0394531
ENSMUSG00000021109	Hif1a	0.9	24	26	12	10	4	15.2	9.44458	2.5	0.164474
ENSMUSG00000021497	Txndc15	0.9	88	36	70	91	27	62.4	29.5008	0.808	0.0129487
ENSMUSG00000021620	Acot12	0.9	0.1	0.5	52	47	0.1	19.94	27.0428	1.89	0.0947844
ENSMUSG00000022361	Zhx1	0.9	19	8	8	9	6	10	5.14782	0.454	0.0454
ENSMUSG00000022474	Pmm1	0.9	178	9	25	2	10	44.8	74.9313	115	2.56696
ENSMUSG00000022607	Ptk2	0.9	60	15	17	10	10	22.4	21.2438	23.9	1.06696
ENSMUSG00000022952	Runx1	0.9	0.5	0.9	0.1	0.2	0.5	0.44	0.31305	1.46	3.31818
ENSMUSG00000023015	Racgap1	0.9	6	1	2	0.3	0.5	1.96	2.35223	9.34	4.76531
ENSMUSG00000023089	Ndufa5	0.9	65	201	121	31	204	124.4	78.21	257	2.06592
ENSMUSG00000023175	Bsg	0.9	611	819	595	340	547	582.4	171.002	51.5	0.0884272
ENSMUSG00000023262	Acy1	0.9	12	8	122	23	5	34	49.6639	104	3.05882
ENSMUSG00000023805	Synj2	0.9	36	18	0.4	1	6	12.28	15.0264	0.807	0.0657166
ENSMUSG00000023914	Mep1a	0.9	0.2	0.2	849	0.1	1	170.1	379.517	18.6	0.109347
ENSMUSG00000024095	Hnrnpll	0.9	9	5	4	4	2	4.8	2.58844	11.7	2.4375
ENSMUSG00000024182	Axin1	0.9	27	14	32	16	12	20.2	8.78635	1.94	0.0960396
ENSMUSG00000024644	Cndp2	0.9	80	26	1300	66	20	298.4	560.495	217	0.727212
ENSMUSG00000024905	Tesmin	0.9	0.7	2	0.4	0.5	0.1	0.74	0.736885	0.004	0.00540541
ENSMUSG00000024952	Rps6ka4	0.9	70	18	27	10	5	26	25.9711	0.28	0.0107692
ENSMUSG00000025036	Sfxn2	0.9	8	5	23	36	4	15.2	13.9176	4.08	0.268421
ENSMUSG00000026126	Ptpn18	0.9	0.2	0.7	8	0.3	0.7	1.98	3.37298	0.957	0.483333
ENSMUSG00000026153	Fam135a	0.9	5	7	3	6	2	4.6	2.07364	0.149	0.0323913
ENSMUSG00000026277	Stk25	0.9	116	28	41	18	23	45.2	40.4932	3.83	0.0847345
ENSMUSG00000026418	Tnni1	0.9	3	0.6	0.3	0.2	16	4.02	6.795	3.17	0.788557
ENSMUSG00000026646	Suv39h2	0.9	2	0.7	0.1	0.5	0.5	0.76	0.726636	0.276	0.363158
ENSMUSG00000026649	Cfap126	0.9	4	0.8	9	2	2	3.56	3.25085	0.106	0.0297753
ENSMUSG00000027030	Stk39	0.9	32	35	9	0.4	0.8	15.44	16.8733	14.3	0.926166
ENSMUSG00000027204	Fbn1	0.9	2	26	5	0.5	11	8.9	10.3706	32.9	3.69663
ENSMUSG00000027630	Tbl1xr1	0.9	22	13	6	9	9	11.8	6.22093	32.2	2.72881
ENSMUSG00000027746	Ufm1	0.9	16	7	15	14	7	11.8	4.43847	124	10.5085
ENSMUSG00000027750	Postn	0.9	0.8	10	2	2	3	3.56	3.68348	36	10.1124
ENSMUSG00000027752	Exosc8	0.9	6	3	4	2	2	3.4	1.67332	82.5	24.2647
ENSMUSG00000027861	Casq2	0.9	7	569	0.7	0.4	16	118.62	251.85	16.7	0.140786
ENSMUSG00000028124	Gclm	0.9	32	11	51	65	3	32.4	26.1304	8.47	0.26142
ENSMUSG00000028514	Usp24	0.9	21	28	18	18	24	21.8	4.26615	9.99	0.458257
ENSMUSG00000028553	Angptl3	0.9	0.9	0.6	5	173	0.4	35.98	76.62	2.96	0.0822679
ENSMUSG00000028653	Trit1	0.9	15	6	10	8	5	8.8	3.96232	0.362	0.0411364
ENSMUSG00000028689	Ccdc163	0.9	4	4	11	4	2	5	3.4641	0.113	0.0226
ENSMUSG00000028763	Hspg2	0.9	7	184	37	6	51	57	73.5969	12.6	0.221053
ENSMUSG00000028789	Azin2	0.9	43	0.7	4	0.5	1	9.84	18.5917	0.062	0.00630081
ENSMUSG00000028969	Cdk5	0.9	151	22	53	17	11	50.8	58.3112	6.1	0.120079
ENSMUSG00000028980	H6pd	0.9	6	31	105	287	38	93.4	114.255	18.5	0.198073
ENSMUSG00000029059	Fam213b	0.9	121	70	32	21	200	88.8	73.4486	8.62	0.0970721
ENSMUSG00000029073	Cptp	0.9	35	6	18	25	10	18.8	11.649	0.953	0.0506915
ENSMUSG00000029195	Klb	0.9	0.7	0.5	0.2	17	0.6	3.8	7.3814	0.233	0.0613158
ENSMUSG00000029470	P2rx4	0.9	9	6	16	17	2	10	6.44205	0.838	0.0838
ENSMUSG00000030287	Itpr2	0.9	6	6	10	8	2	6.4	2.96648	0.95	0.148438
ENSMUSG00000030451	Herc2	0.9	45	14	10	8	17	18.8	15.0566	3.49	0.185638
ENSMUSG00000030595	Nfkbib	0.9	33	15	24	26	16	22.8	7.46324	0.886	0.0388596
ENSMUSG00000030881	Arfip2	0.9	62	8	27	9	4	22	24.052	7.33	0.333182
ENSMUSG00000031400	G6pdx	0.9	41	9	35	5	5	19	17.5499	31.7	1.66842
ENSMUSG00000031494	Cd209a	0.9	0.3	0.5	1	0.1	0.7	0.52	0.349285	0.271	0.521154
ENSMUSG00000031538	Plat	0.9	56	19	41	0.5	3	23.9	24.1413	0.224	0.00937238
ENSMUSG00000031642	Sh3rf1	0.9	31	6	14	2	1	10.8	12.3976	0.345	0.0319444
ENSMUSG00000031740	Mmp2	0.9	5	77	9	3	34	25.6	31.3177	5.61	0.219141
ENSMUSG00000031782	Coq9	0.9	57	228	134	71	170	132	70.7284	40.5	0.306818
ENSMUSG00000031820	Babam1	0.9	132	53	113	92	58	89.6	34.2389	0.75	0.00837054
ENSMUSG00000031849	Comp	0.9	0.8	13	2	0.1	15	6.18	7.20569	17.7	2.86408
ENSMUSG00000032501	Trib1	0.9	20	15	9	69	6	23.8	25.8399	0.484	0.0203361
ENSMUSG00000032534	Cep63	0.9	7	6	5	2	2	4.4	2.30217	0.197	0.0447727
ENSMUSG00000033184	Tmed7	0.9	22	16	14	22	3	15.4	7.79744	20.2	1.31169
ENSMUSG00000033373	Fntb	0.9	25	9	6	2	4	9.2	9.20326	147	15.9783
ENSMUSG00000033721	Vav3	0.9	6	2	4	0.4	0.6	2.6	2.38328	2.04	0.784615
ENSMUSG00000034055	Phka1	0.9	14	31	5	2	236	57.6	100.366	1.55	0.0269097
ENSMUSG00000034863	Ano8	0.9	74	19	21	3	13	26	27.7308	0.046	0.00176923
ENSMUSG00000035258	Abi3bp	0.9	6	8	1	1	4	4	3.08221	1.06	0.265
ENSMUSG00000035299	Mid1	0.9	11	6	5	6	4	6.4	2.70185	0.18	0.028125
ENSMUSG00000036550	Cnot1	0.9	43	50	24	32	19	33.6	12.8957	28.7	0.854167
ENSMUSG00000036686	Cc2d1a	0.9	79	13	36	12	11	30.2	29.201	0.88	0.0291391
ENSMUSG00000036752	Tubb4b	0.9	314	200	208	139	138	199.8	71.8067	18398	92.0821
ENSMUSG00000036819	Jmjd4	0.9	9	7	3	3	4	5.2	2.68328	0	0
ENSMUSG00000036931	Nfkbid	0.9	6	1	1	0.2	0.2	1.68	2.44786	0.212	0.12619
ENSMUSG00000037242	Clic4	0.9	57	215	47	30	11	72	81.8291	509	7.06944
ENSMUSG00000037541	Shank2	0.9	92	0.4	15	6	0.1	22.7	39.2069	2.25	0.0991189
ENSMUSG00000037933	Bicd2	0.9	43	46	10	5	13	23.4	19.5013	1.28	0.0547009
ENSMUSG00000038002	Cramp1l	0.9	17	10	7	5	4	8.6	5.22494	0.494	0.0574419
ENSMUSG00000038058	Nod1	0.9	6	18	13	7	8	10.4	5.02991	0.125	0.0120192
ENSMUSG00000038374	Rbm8a	0.9	36	17	20	20	12	21	9	664	31.619
ENSMUSG00000038393	Txnip	0.9	31	237	200	31	197	139.2	100.021	0.636	0.00456897
ENSMUSG00000038583	Pln	0.9	0.4	2869	1	0.3	1	574.34	1282.75	6.64	0.0115611
ENSMUSG00000038848	Ythdf1	0.9	57	36	19	25	19	31.2	16.0062	5.01	0.160577
ENSMUSG00000039058	Ak5	0.9	126	0.1	1	0.1	0.1	25.46	56.2049	1.1	0.043205
ENSMUSG00000039414	Heatr5b	0.9	27	27	9	6	3	14.4	11.6962	8.09	0.561806
ENSMUSG00000039623	Ap5z1	0.9	23	4	13	6	3	9.8	8.34865	0.021	0.00214286
ENSMUSG00000039715	Wdr34	0.9	51	6	25	6	3	18.2	20.315	0.042	0.00230769
ENSMUSG00000040249	Lrp1	0.9	181	52	20	200	17	94	89.4064	9.14	0.097234
ENSMUSG00000040565	Btaf1	0.9	9	7	4	7	3	6	2.44949	1.43	0.238333
ENSMUSG00000040586	Ofd1	0.9	5	3	2	1	2	2.6	1.51658	0.656	0.252308
ENSMUSG00000040592	Cd79b	0.9	0.6	3	1	1	0.6	1.24	1.00399	3.44	2.77419
ENSMUSG00000040811	Eml2	0.9	220	25	20	8	6	55.8	92.1369	53.7	0.962366
ENSMUSG00000040952	Rps19	0.9	41	26	109	29	22	45.4	36.2533	682	15.022
ENSMUSG00000041625	Ggact	0.9	17	9	144	66	6	48.4	58.7052	2.3	0.0475207
ENSMUSG00000041695	Kcnj2	0.9	7	28	1	0.2	19	11.04	12.0999	0.446	0.0403986
ENSMUSG00000041697	Cox6a1	0.9	1087	140	2341	632	90	858	923.059	183	0.213287
ENSMUSG00000042041	2010003K11Rik	0.9	0.6	0.9	5	30	1	7.5	12.7075	0.004	0.000533333
ENSMUSG00000042228	Lyn	0.9	8	12	10	15	2	9.4	4.87852	11.5	1.2234
ENSMUSG00000042354	Gnl3	0.9	19	17	8	20	13	15.4	4.9295	79.8	5.18182
ENSMUSG00000042369	Rbm45	0.9	52	27	21	17	8	25	16.5982	0.295	0.0118
ENSMUSG00000044501	Zfp758	0.9	4	4	3	2	2	3	1	0.244	0.0813333
ENSMUSG00000046311	Zfp62	0.9	7	6	4	2	2	4.2	2.28035	0.352	0.0838095
ENSMUSG00000046727	Cystm1	0.9	18	10	109	2	57	39.2	44.37	0	0
ENSMUSG00000047281	Sfn	0.9	11	5	18	2	3	7.8	6.68581	303	38.8462
ENSMUSG00000047419	Cmya5	0.9	2	217	0.2	0.3	412	126.3	185.121	0.043	0.000340459
ENSMUSG00000048458	Inka2	0.9	63	23	0.7	0.1	4	18.16	26.7655	0.407	0.0224119
ENSMUSG00000049305	Ccdc71	0.9	40	12	25	17	10	20.8	12.1943	0.284	0.0136538
ENSMUSG00000052305	Hbb-bs	0.9	101	1551	600	106	147	501	623.226	3101	6.18962
ENSMUSG00000052794	1700030K09Rik	0.9	10	5	9	2	3	5.8	3.56371	0.406	0.07
ENSMUSG00000052921	Arhgef15	0.9	16	31	12	4	7	14	10.5594	0.414	0.0295714
ENSMUSG00000055670	Zzef1	0.9	15	8	7	7	3	8	4.3589	2.35	0.29375
ENSMUSG00000057110	Cntrl	0.9	3	3	4	3	3	3.2	0.447214	1.59	0.496875
ENSMUSG00000057963	Itpk1	0.9	99	9	25	27	9	33.8	37.4326	121	3.57988
ENSMUSG00000058006	Mdn1	0.9	8	3	3	1	2	3.4	2.70185	1.03	0.302941
ENSMUSG00000059981	Taok2	0.9	96	23	34	13	13	35.8	34.752	0.295	0.00824022
ENSMUSG00000063953	Amd2	0.9	1	1	0.2	0.1	2	0.86	0.766812	1.18	1.37209
ENSMUSG00000064254	Ethe1	0.9	26	27	235	101	21	82	91.7224	113	1.37805
ENSMUSG00000066148	Prpf4	0.9	12	10	5	6	9	8.4	2.88097	7.49	0.891667
ENSMUSG00000069114	Zbtb10	0.9	4	6	3	1	1	3	2.12132	0.09	0.03
ENSMUSG00000069919	Hba-a1	0.9	48	496	151	36	36	153.4	197.519	3877	25.2738
ENSMUSG00000070047	Fat1	0.9	26	13	11	9	1	12	9.05539	0.666	0.0555
ENSMUSG00000071477	Zfp777	0.9	49	12	19	6	14	20	16.8671	0.01	0.0005
ENSMUSG00000073422	H2-Ke6	0.9	2	2	5	3	4	3.2	1.30384	33.1	10.3438
ENSMUSG00000073792	Alg6	0.9	3	2	0.7	1	0.8	1.5	0.984886	0.246	0.164
ENSMUSG00000078599	Skint8	0.9	0.3	0.1	0.2	0.3	0.3	0.24	0.0894427	0	0
ENSMUSG00000078656	Vps25	0.9	2	1	4	1	0.7	1.74	1.35573	149	85.6322
ENSMUSG00000000340	Dbt	0.89	13	47	35	46	9	30	18.0278	74.3	2.47667
ENSMUSG00000000915	Hip1r	0.89	55	8	30	18	3	22.8	20.7533	1.69	0.0741228
ENSMUSG00000001062	Vps9d1	0.89	55	19	20	10	7	22.2	19.1755	0.129	0.00581081
ENSMUSG00000001441	Npepps	0.89	82	49	13	8	16	33.6	31.5008	132	3.92857
ENSMUSG00000001467	Cyp51	0.89	31	6	81	86	3	41.4	39.9787	15.5	0.374396
ENSMUSG00000002006	Pdzd4	0.89	128	2	2	0.4	1	26.68	56.6437	0.759	0.0284483
ENSMUSG00000002059	Rab34	0.89	21	8	58	3	3	18.6	23.2228	3.92	0.210753
ENSMUSG00000002068	Ccne1	0.89	19	0.8	0.1	0.3	0.3	4.1	8.33337	0.586	0.142927
ENSMUSG00000002108	Nr1h3	0.89	7	12	60	132	21	46.4	52.1852	0.06	0.0012931
ENSMUSG00000003435	Supt5	0.89	218	75	103	78	60	106.8	64.0523	108	1.01124
ENSMUSG00000003444	Med29	0.89	34	21	34	26	18	26.6	7.33485	1.93	0.0725564
ENSMUSG00000003581	Rnf215	0.89	38	12	25	9	4	17.6	13.7949	0.754	0.0428409
ENSMUSG00000004317	Clcn5	0.89	5	1	12	1	0.5	3.9	4.87852	0.807	0.206923
ENSMUSG00000005779	Psmb4	0.89	79	49	127	66	70	78.2	29.3718	792	10.1279
ENSMUSG00000006732	Mettl1	0.89	10	5	20	11	8	10.8	5.63028	89.8	8.31481
ENSMUSG00000006931	P3h4	0.89	23	39	13	0.6	4	15.92	15.5574	0.262	0.0164573
ENSMUSG00000008690	Ncaph2	0.89	79	29	55	25	30	43.6	23.0608	34.2	0.784404
ENSMUSG00000010064	Slc38a3	0.89	96	84	45	942	36	240.6	392.911	7.4	0.0307564
ENSMUSG00000010095	Slc3a2	0.89	166	41	285	39	18	109.8	114.047	66.7	0.607468
ENSMUSG00000011305	Plin5	0.89	2	97	8	40	18	33	38.5876	1.54	0.0466667
ENSMUSG00000011306	Sugp1	0.89	75	22	50	22	17	37.2	24.8133	1.85	0.0497312
ENSMUSG00000015474	Ppt2	0.89	33	25	78	23	11	34	25.8263	7.55	0.222059
ENSMUSG00000015653	Steap2	0.89	6	0.3	11	1	0.1	3.68	4.75363	0.454	0.12337
ENSMUSG00000016559	H3f3b	0.89	112	52	131	90	18	80.6	45.6925	2331	28.9206
ENSMUSG00000017291	Taok1	0.89	29	22	5	7	7	14	10.8167	2.8	0.2
ENSMUSG00000017309	Cd300lg	0.89	0.4	76	31	11	14	26.48	29.7834	0.688	0.0259819
ENSMUSG00000017412	Cacnb4	0.89	34	0.2	2	0.2	0.1	7.3	14.9469	1.65	0.226027
ENSMUSG00000018809	Smyd4	0.89	7	3	3	1	2	3.2	2.28035	0.275	0.0859375
ENSMUSG00000019055	Plod1	0.89	28	74	22	34	13	34.2	23.5627	4.66	0.136257
ENSMUSG00000020083	Fam241b	0.89	34	1	5	1	0.3	8.26	14.5082	3.78	0.457627
ENSMUSG00000020111	Micu1	0.89	31	4	16	9	12	14.4	10.2616	4.43	0.307639
ENSMUSG00000020388	Pdlim4	0.89	11	10	4	1	3	5.8	4.43847	4.14	0.713793
ENSMUSG00000020456	Ogdh	0.89	289	1824	303	143	302	572.2	703.01	186	0.325061
ENSMUSG00000020601	Trib2	0.89	46	28	30	0.9	10	22.98	17.7511	0	0
ENSMUSG00000020679	Hnf1b	0.89	0.6	0.3	185	16	0.1	40.4	81.1182	0.467	0.0115594
ENSMUSG00000020775	Mrpl38	0.89	54	50	77	74	32	57.4	18.5149	3.21	0.0559233
ENSMUSG00000021234	Fam161b	0.89	8	6	2	0.3	0.9	3.44	3.38127	0	0
ENSMUSG00000021273	Fdft1	0.89	95	19	29	110	32	57	42.1485	3.87	0.0678947
ENSMUSG00000021665	Hexb	0.89	89	17	131	9	4	50	56.9386	29	0.58
ENSMUSG00000022681	Ntan1	0.89	30	12	19	7	9	15.4	9.34345	0.407	0.0264286
ENSMUSG00000022682	Rrn3	0.89	54	48	15	21	41	35.8	17.0206	8.61	0.240503
ENSMUSG00000022877	Hrg	0.89	0.5	4	19	1388	1	282.5	618.039	232	0.821239
ENSMUSG00000023393	Slc17a9	0.89	1	0.5	0.6	7	0.2	1.86	2.88756	0.075	0.0403226
ENSMUSG00000024974	Smc3	0.89	19	13	10	6	6	10.8	5.44977	44.6	4.12963
ENSMUSG00000025103	Btbd1	0.89	55	70	23	19	50	43.4	21.7784	0.303	0.00698157
ENSMUSG00000025995	Wdr75	0.89	8	7	5	6	4	6	1.58114	1.73	0.288333
ENSMUSG00000026023	Cdk15	0.89	2	0.4	0.6	0.4	0.2	0.72	0.729383	0.505	0.701389
ENSMUSG00000026674	Ddr2	0.89	2	9	3	0.9	7	4.38	3.46006	0.378	0.0863014
ENSMUSG00000026749	Nek6	0.89	18	2	8	43	3	14.8	16.9912	0.893	0.0603378
ENSMUSG00000026814	Eng	0.89	51	253	134	52	20	102	94.406	0.841	0.0082451
ENSMUSG00000027131	Emc4	0.89	184	48	90	69	55	89.2	55.3688	5.79	0.0649103
ENSMUSG00000027364	Usp50	0.89	0.7	0.4	0.9	0.5	0.3	0.56	0.240832	0.162	0.289286
ENSMUSG00000027570	Col9a3	0.89	21	0.2	0.3	0.1	0.2	4.36	9.30231	1.2	0.275229
ENSMUSG00000027678	Ncoa3	0.89	24	23	24	10	8	17.8	8.07465	21.5	1.20787
ENSMUSG00000028049	Scamp3	0.89	92	49	76	58	28	60.6	24.6333	21.7	0.358086
ENSMUSG00000028518	Prkaa2	0.89	12	67	16	16	39	30	23.2702	1.14	0.038
ENSMUSG00000028532	Cachd1	0.89	22	3	12	0.6	2	7.92	9.05163	0.081	0.0102273
ENSMUSG00000029334	Prkg2	0.89	6	0.3	0.3	0.1	0.2	1.38	2.58399	0.162	0.117391
ENSMUSG00000029345	Tfip11	0.89	60	18	23	23	10	26.8	19.3054	5.69	0.212313
ENSMUSG00000029390	Tmed2	0.89	90	142	109	164	63	113.6	40.2654	43.9	0.386444
ENSMUSG00000029456	Acad10	0.89	2	3	33	12	2	10.4	13.3154	4.06	0.390385
ENSMUSG00000029463	Fam216a	0.89	45	5	13	3	2	13.6	18.0776	0.723	0.0531618
ENSMUSG00000030138	Bms1	0.89	19	17	14	15	20	17	2.54951	3.47	0.204118
ENSMUSG00000030604	Zfp626	0.89	3	4	2	2	1	2.4	1.14018	0.198	0.0825
ENSMUSG00000030613	Ccdc90b	0.89	10	13	11	4	5	8.6	3.91152	11	1.27907
ENSMUSG00000030689	Ino80e	0.89	27	6	12	5	4	10.8	9.57601	2.22	0.205556
ENSMUSG00000030894	Tpp1	0.89	78	57	131	59	23	69.6	39.6333	48.8	0.701149
ENSMUSG00000031090	Nadsyn1	0.89	4	4	32	17	2	11.8	12.775	0.176	0.0149153
ENSMUSG00000031197	Vbp1	0.89	28	18	8	5	14	14.6	9.04434	366	25.0685
ENSMUSG00000031375	Bgn	0.89	15	172	103	33	22	69	67.4277	64.7	0.937681
ENSMUSG00000031879	Fam96b	0.89	37	35	34	15	23	28.8	9.44458	185	6.42361
ENSMUSG00000032058	Ppp2r1b	0.89	12	5	7	7	3	6.8	3.34664	133	19.5588
ENSMUSG00000032175	Tyk2	0.89	17	11	19	16	6	13.8	5.26308	0.044	0.00318841
ENSMUSG00000032285	Dnaja4	0.89	19	35	10	2	20	17.2	12.3572	22.2	1.2907
ENSMUSG00000032399	Rpl4	0.89	613	358	470	562	338	468.2	121.31	1079	2.30457
ENSMUSG00000032577	Mapkapk3	0.89	3	20	16	3	17	11.8	8.16701	1.93	0.163559
ENSMUSG00000032946	Rasgrp2	0.89	18	9	5	2	4	7.6	6.34823	2.49	0.327632
ENSMUSG00000033170	Card10	0.89	10	24	74	7	8	24.6	28.457	0.01	0.000406504
ENSMUSG00000033429	Mcee	0.89	27	54	138	47	37	60.6	44.4556	21.6	0.356436
ENSMUSG00000033732	Sf3b3	0.89	77	54	27	30	12	40	25.5832	124	3.1
ENSMUSG00000033777	Tlr13	0.89	1	0.9	0.4	0.7	0.1	0.62	0.370135	0.244	0.393548
ENSMUSG00000034109	Golim4	0.89	5	6	4	10	2	5.4	2.96648	4.81	0.890741
ENSMUSG00000034163	Zfc3h1	0.89	12	9	5	7	4	7.4	3.20936	0.201	0.0271622
ENSMUSG00000034297	Med13	0.89	20	19	4	8	10	12.2	7.01427	0.115	0.00942623
ENSMUSG00000034333	Zbed4	0.89	3	3	3	1	4	2.8	1.09545	0.01	0.00357143
ENSMUSG00000034354	Mtmr3	0.89	52	31	20	12	25	28	15.1162	8.25	0.294643
ENSMUSG00000035183	Slc24a5	0.89	3	0.2	0.9	0.4	0.1	0.92	1.20291	0.004	0.00434783
ENSMUSG00000035441	Myo1d	0.89	16	11	36	7	2	14.4	13.1263	6.56	0.455556
ENSMUSG00000035540	Gc	0.89	7	14	99	7040	8	1433.6	3134.31	1309	0.913086
ENSMUSG00000035735	Dagla	0.89	126	6	6	0.7	7	29.14	54.2028	7.18	0.246397
ENSMUSG00000036098	Myrf	0.89	54	9	6	19	0.1	17.62	21.4574	0.964	0.0547106
ENSMUSG00000036155	Mgat5	0.89	50	10	8	4	0.8	14.56	20.1288	0.546	0.0375
ENSMUSG00000036707	Cab39	0.89	55	35	20	17	38	33	15.3134	61.7	1.8697
ENSMUSG00000036885	Arhgef26	0.89	8	0.6	0.4	7	0.1	3.22	3.92709	0.264	0.0819876
ENSMUSG00000037339	Fam53a	0.89	10	9	11	7	11	9.6	1.67332	0.487	0.0507292
ENSMUSG00000037344	Slc12a9	0.89	30	3	18	5	4	12	11.7686	0.514	0.0428333
ENSMUSG00000037370	Enpp1	0.89	3	2	5	4	0.6	2.92	1.71231	1.37	0.469178
ENSMUSG00000037624	Kcnk2	0.89	37	0.8	0.9	0.1	0.3	7.82	16.3155	0	0
ENSMUSG00000037646	Vps13b	0.89	13	6	7	8	2	7.2	3.96232	0.049	0.00680556
ENSMUSG00000038403	Hfe2	0.89	1	269	2	94	562	185.6	237.07	0.011	5.92672e-05
ENSMUSG00000038530	Rgs4	0.89	274	10	2	0.7	3	57.94	120.835	1.4	0.0241629
ENSMUSG00000038976	Ppp1r9b	0.89	1084	41	48	7	20	240	472.094	32.5	0.135417
ENSMUSG00000039599	Fam149b	0.89	34	16	21	16	9	19.2	9.31128	0.067	0.00348958
ENSMUSG00000039849	Pcif1	0.89	55	17	23	12	10	23.4	18.3657	0.346	0.0147863
ENSMUSG00000040134	Rdh7	0.89	0.7	2	8	1180	2	238.54	526.3	57.7	0.241888
ENSMUSG00000040167	Ikzf5	0.89	15	13	3	4	4	7.8	5.71839	0.133	0.0170513
ENSMUSG00000040532	Abhd11	0.89	27	26	51	23	26	30.6	11.5022	20.7	0.676471
ENSMUSG00000040943	Tet2	0.89	7	5	6	2	3	4.6	2.07364	4.63	1.00652
ENSMUSG00000041040	Fam117b	0.89	27	9	7	2	2	9.4	10.3102	0.634	0.0674468
ENSMUSG00000041064	Pif1	0.89	0.2	0.1	0.9	0.1	0.1	0.28	0.349285	0.143	0.510714
ENSMUSG00000041328	Pcf11	0.89	11	10	7	6	4	7.6	2.88097	0.476	0.0626316
ENSMUSG00000041351	Rap1gap	0.89	232	8	79	2	2	64.6	99.0848	4.03	0.0623839
ENSMUSG00000041859	Mcm3	0.89	2	3	5	2	1	2.6	1.51658	460	176.923
ENSMUSG00000042251	Pm20d1	0.89	1	6	22	48	0.3	15.46	20.1868	19	1.22898
ENSMUSG00000044461	Shisa2	0.89	7	2	1	0.4	64	14.88	27.5821	0.791	0.0531586
ENSMUSG00000044573	Acp1	0.89	34	13	30	29	9	23	11.2027	247	10.7391
ENSMUSG00000046027	Stard5	0.89	7	3	29	36	1	15.2	16.1307	5.39	0.354605
ENSMUSG00000047126	Cltc	0.89	214	78	42	58	23	83	75.9803	356	4.28916
ENSMUSG00000047141	Zfp654	0.89	7	6	0.9	4	4	4.38	2.33923	0.018	0.00410959
ENSMUSG00000048410	Zfp407	0.89	3	2	2	1	0.9	1.78	0.861394	0.216	0.121348
ENSMUSG00000048583	Igf2	0.89	78	51	2	0.3	14	29.06	34.1419	29.1	1.00138
ENSMUSG00000049225	Pdp1	0.89	64	15	3	0.4	11	18.68	26.0118	3	0.1606
ENSMUSG00000049287	Iba57	0.89	8	13	11	9	5	9.2	3.03315	4.7	0.51087
ENSMUSG00000051811	Cox6b2	0.89	10	3	31	0.6	0.4	9	12.8988	3.92	0.435556
ENSMUSG00000057236	Rbbp4	0.89	33	21	26	31	11	24.4	8.82043	3485	142.828
ENSMUSG00000058099	Nfam1	0.89	7	3	0.8	5	2	3.56	2.46333	0.119	0.033427
ENSMUSG00000059336	Slc14a1	0.89	19	0.3	3	0.3	0.1	4.54	8.17209	0.767	0.168943
ENSMUSG00000059820	Nkapd1	0.89	7	4	3	3	2	3.8	1.92354	1.24	0.326316
ENSMUSG00000061816	Myl1	0.89	0.5	28	0.5	2	6695	1345.2	2990.65	182	0.135296
ENSMUSG00000062031	Pgghg	0.89	8	6	57	31	4	21.2	22.7969	0.542	0.025566
ENSMUSG00000062098	Btbd3	0.89	100	10	5	2	3	24	42.5969	0.101	0.00420833
ENSMUSG00000062906	Hdac10	0.89	15	10	21	8	7	12.2	5.80517	0.189	0.0154918
ENSMUSG00000062995	Ica1	0.89	28	5	4	1	0.7	7.74	11.4777	0.882	0.113953
ENSMUSG00000063047	Zfp780b	0.89	2	1	0.5	2	0.6	1.22	0.736206	0.014	0.0114754
ENSMUSG00000064326	Siva1	0.89	15	13	20	5	10	12.6	5.59464	0.41	0.0325397
ENSMUSG00000067365	Tmem128	0.89	14	5	12	12	4	9.4	4.5607	0.046	0.00489362
ENSMUSG00000069135	Fgfr1op	0.89	4	6	6	5	4	5	1	56.8	11.36
ENSMUSG00000069805	Fbp1	0.89	1	3	1205	1305	1	503	687.389	85	0.168986
ENSMUSG00000070527	Mkrn3	0.89	0.9	0.2	2	0.2	0.2	0.7	0.787401	0.759	1.08429
ENSMUSG00000071573	Rnls	0.89	0.4	6	6	0.2	5	3.52	2.9685	0.075	0.0213068
ENSMUSG00000073842	Mup7	0.89	0.5	8	13	2980	8	601.9	1329.41	114	0.1894
ENSMUSG00000074166	AW146154	0.89	1	1	0.3	2	1	1.06	0.60663	0.106	0.1
ENSMUSG00000074622	Mafb	0.89	19	12	17	32	24	20.8	7.59605	0.165	0.00793269
ENSMUSG00000075271	Ttc30a1	0.89	1	2	2	0.8	0.6	1.28	0.672309	0.05	0.0390625
ENSMUSG00000075600	Zc3h3	0.89	15	4	4	4	2	5.8	5.21536	0.342	0.0589655
ENSMUSG00000076435	Acsf2	0.89	38	48	34	210	4	66.8	81.7141	131	1.96108
ENSMUSG00000078872	Gm14401	0.89	0.9	0.4	0.2	0.4	0.4	0.46	0.260768	0.131	0.284783
ENSMUSG00000079334	Nat6	0.89	27	19	37	46	9	27.6	14.5534	0.038	0.00137681
ENSMUSG00000001065	Zfp276	0.88	15	7	10	11	3	9.2	4.49444	0.044	0.00478261
ENSMUSG00000001333	Sync	0.88	0.9	15	0.1	0.1	18	6.82	8.90601	0.222	0.0325513
ENSMUSG00000001964	Emd	0.88	50	36	24	19	21	30	12.9808	147	4.9
ENSMUSG00000002102	Psmc3	0.88	113	76	119	66	103	95.4	23.2659	528	5.53459
ENSMUSG00000002210	Smg9	0.88	45	9	17	8	10	17.8	15.6109	0.935	0.0525281
ENSMUSG00000002550	Uck1	0.88	40	17	64	33	8	32.4	21.7325	1.33	0.0410494
ENSMUSG00000002983	Relb	0.88	9	7	3	3	4	5.2	2.68328	0.058	0.0111538
[truncated: 9,969 more rows]

## Sheet: X. tropicalis
gene_ID	gene_name	DBF_score	TPM_brain	TPM_heart	TPM_kidney	TPM_liver	TPM_skeletalmuscle	TPM_mean	TPM_sd	ppm_value	ppm_TPM_ratio		Avg. values for specific fractions
ENSXETG00000000624	serpinb1	1	9	20	39	13	3	16.8	13.8636	17	1.0119			avg. DBF score	avg. TPM	avg. ppm	avg. ppm/TPM
ENSXETG00000005391	alyref	1	94	53	171	46	26	78	57.5717	2845	36.4744		total	0.529111	269.485	619.042	13.5168
ENSXETG00000009734	herc1	1	40	16	35	9	15	23	13.6198	12.3	0.534783		DBFscore intermediate	0.522428	199.214	280.047	261.584
ENSXETG00000010397	gcc2	1	2	2	6	1	0.5	2.3	2.16795	0.456	0.198261		DBFscore>0.95	0.978793	117.848	92.5552	145.433
ENSXETG00000014757	trip12	1	54	29	66	17	26	38.4	20.647	0.153	0.00398438		DBFscore<0.05	0.02225	126.578	50.6825	88.9
ENSXETG00000015206	mrpl43	1	43	39	46	12	41	36.2	13.7732	1197	33.0663
ENSXETG00000016417	ap1b1	1	77	17	52	21	13	36	27.6225	92.6	2.57222
ENSXETG00000017151	zfhx4	1	9	3	3	2	2	3.8	2.94958	0.275	0.0723684		Standard deviation
ENSXETG00000022882	myo1c	1	7	37	39	10	10	20.6	15.9468	15.1	0.73301			avg. DBF score	avg. TPM	avg. ppm	avg. ppm/TPM
ENSXETG00000024651	arid4b	1	28	10	13	4	4	11.8	9.85901	57.5	4.87288		total	0.294808	1121.33	1813.99	49.8845
ENSXETG00000001141	hba4	0.99	26	38	120	185	19	77.6	72.4521	107	1.37887		DBFscore intermediate	0.267062	460.153	1094.59	730.251
ENSXETG00000003973	trub2	0.99	19	8	19	6	10	12.4	6.1887	132	10.6452		DBFscore>0.95	0.0141516	261.742	348.119	460.381
ENSXETG00000010684	dnajc19	0.99	67	85	114	92	44	80.4	26.4064	679	8.44527		DBFscore<0.05	0.0152459	318.809	99.0011	104.254
ENSXETG00000012895	sh3glb2	0.99	288	8	66	18	3	76.6	120.788	66	0.861619
ENSXETG00000016175	rpn1	0.99	191	46	134	99	44	102.8	62.1506	35.5	0.345331
ENSXETG00000016477	pygl	0.99	73	45	347	283	11	151.8	152.28	243	1.60079
ENSXETG00000018242	eml1	0.99	212	2	20	5	1	48	91.9973	67.3	1.40208
ENSXETG00000019246	ENSXETG00000019246	0.99	1	0.1	17	1	0.8	3.98	7.2878	2097	526.884
ENSXETG00000020588	mus81	0.99	7	10	9	1	8	7	3.53553	1.7	0.242857
ENSXETG00000024796	ewsr1	0.99	197	55	115	53	35	91	66.4981	180	1.97802
ENSXETG00000000201	ubr2	0.98	9	9	19	5	8	10	5.2915	208	20.8
ENSXETG00000004391	fryl	0.98	35	17	43	8	29	26.4	13.9929	305	11.553
ENSXETG00000006582	paxip1	0.98	23	5	21	4	3	11.2	9.90959	36.5	3.25893
ENSXETG00000009385	plaa	0.98	36	17	27	7	15	20.4	11.2606	19.1	0.936275
ENSXETG00000009781	tagap	0.98	2	0.8	2	4	0.4	1.84	1.40285	31.2	16.9565
ENSXETG00000011185	tuba4a	0.98	1055	174	56	18	11	262.8	447.65	2801	10.6583
ENSXETG00000012132	trmt10a	0.98	13	5	11	5	3	7.4	4.3359	43	5.81081
ENSXETG00000012164	hdlbp	0.98	203	98	335	168	247	210.2	88.5308	55.7	0.264986
ENSXETG00000012224	gmfb	0.98	62	19	42	7	4	26.8	24.7123	265	9.88806
ENSXETG00000013714	cpne3	0.98	24	17	132	27	8	41.6	51.0617	5.6	0.134615
ENSXETG00000016144	sf3a1	0.98	83	39	62	21	15	44	28.4605	158	3.59091
ENSXETG00000016155	smtn	0.98	6	7	21	0.5	15	9.9	8.08084	68.9	6.9596
ENSXETG00000018694	alox12b	0.98	0.1	0.2	4	4	0.1	1.68	2.11825	11.6	6.90476
ENSXETG00000022422	ube2l3	0.98	129	82	96	83	43	86.6	30.9079	691	7.97921
ENSXETG00000024453	sympk	0.98	47	10	34	12	7	22	17.5926	17.8	0.809091
ENSXETG00000033295	TMEM70	0.98	17	16	36	14	19	20.4	8.90505	2.79	0.136765
ENSXETG00000002769	ptx	0.97	0.5	28	0.1	1410	2	288.12	627.26	84.4	0.292933
ENSXETG00000003046	fancm	0.97	1	1	6	3	1	2.4	2.19089	1104	460
ENSXETG00000007975	tuba3c	0.97	54	94	125	60	11	68.8	43.101	1715	24.9273
ENSXETG00000008500	ola1	0.97	137	106	117	83	66	101.8	27.941	216	2.12181
ENSXETG00000010597	nup205	0.97	20	4	23	4	4	11	9.64365	41.8	3.8
ENSXETG00000015299	smarca2	0.97	78	29	54	16	24	40.2	25.4598	138	3.43284
ENSXETG00000026062	LRBA	0.97	10	3	18	5	2	7.6	6.58027	8.8	1.15789
ENSXETG00000000469	tmem169	0.96	37	5	17	0.2	2	12.24	15.313	116	9.47712
ENSXETG00000001998	psma7	0.96	127	93	83	85	100	97.6	17.7708	725	7.42828
ENSXETG00000002956	ammecr1l	0.96	16	2	15	2	3	7.6	7.23187	68.8	9.05263
ENSXETG00000004172	gnpda1	0.96	25	17	95	41	10	37.6	34.0999	196	5.21277
ENSXETG00000005329	polr2b	0.96	17	13	20	7	10	13.4	5.22494	415	30.9701
ENSXETG00000006690	scyl2	0.96	4	4	11	3	2	4.8	3.56371	36.2	7.54167
ENSXETG00000007282	top2b	0.96	36	8	14	5	4	13.4	13.2212	7.87	0.587313
ENSXETG00000013014	chaf1b	0.96	1	0.5	12	0.7	0.1	2.86	5.11986	80.9	28.2867
ENSXETG00000013562	rap1a	0.96	47	60	93	69	43	62.4	19.995	113	1.8109
ENSXETG00000014870	ctsa	0.96	115	29	231	75	12	92.4	87.3316	60.6	0.655844
ENSXETG00000015468	rpl37a	0.96	1486	2192	2714	4238	912	2308.4	1277.47	1679	0.727344
ENSXETG00000018032	tubb2b	0.96	461	3	4	0.3	4	94.46	204.908	6253	66.1973
ENSXETG00000023202	uba52	0.96	932	1616	2379	3299	875	1820.2	1027.51	7243	3.97923
ENSXETG00000024486	haus6	0.96	0.6	0.6	9	0.5	0.3	2.2	3.80329	117	53.1818
ENSXETG00000027491	dbr1	0.96	42	21	23	13	14	22.6	11.6748	51.8	2.29204
ENSXETG00000002903	samd4b	0.95	39	21	45	11	10	25.2	16.0686	45	1.78571
ENSXETG00000002942	rps15a	0.95	521	1323	1241	3028	241	1270.8	1085.59	7705	6.06311
ENSXETG00000006002	eml4	0.95	42	9	34	7	8	20	16.6883	20	1
ENSXETG00000006433	GDPD2	0.95	19	5	12	13	1	10	7.07107	4.17	0.417
ENSXETG00000007509	hspd1	0.95	34	32	94	22	30	42.4	29.2027	324	7.64151
ENSXETG00000008032	idh1	0.95	32	12	162	69	5	56	64.2612	640	11.4286
ENSXETG00000013323	nap1l1	0.95	212	287	326	142	177	228.8	76.3787	2479	10.8348
ENSXETG00000013742	ndrg4	0.95	1311	1058	22	0.1	2	478.62	650.613	138	0.288329
ENSXETG00000018576	mapk1	0.95	502	52	90	16	68	145.6	201.054	84.4	0.57967
ENSXETG00000018700	pofut2	0.95	18	3	5	3	0.9	5.98	6.87401	111	18.5619
ENSXETG00000018742	tmed7	0.95	66	33	44	34	19	39.2	17.427	135	3.44388
ENSXETG00000026351	psmb5	0.95	108	45	75	52	62	68.4	24.8455	318	4.64912
ENSXETG00000027997	selenos	0.95	110	50	83	96	37	75.2	30.8172	10.6	0.140957
ENSXETG00000034056	DYNC1H1	0.95	124	30	48	10	26	47.6	44.7973	1.27	0.0266807
ENSXETG00000000233	myh9	0.94	13	37	162	33	9	50.8	63.3419	119	2.34252
ENSXETG00000005191	aldh7a1	0.94	82	62	219	76	51	98	68.7132	28.8	0.293878
ENSXETG00000008065	echdc2	0.94	4	89	38	24	57	42.4	32.47	388	9.15094
ENSXETG00000009396	rps3a	0.94	1582	3151	2957	4317	1872	2775.8	1094.41	3502	1.26162
ENSXETG00000009503	ankrd52	0.94	3	7	21	2	6	7.8	7.66159	17	2.17949
ENSXETG00000010068	sumf2	0.94	10	8	15	6	4	8.6	4.219	234	27.2093
ENSXETG00000010077	cct6a	0.94	175	128	135	56	64	111.6	50.4807	1055	9.45341
ENSXETG00000017990	ptpn9	0.94	35	9	15	6	5	14	12.3693	0.965	0.0689286
ENSXETG00000025899	dynll2	0.94	436	126	50	5	29	129.2	177.394	262	2.02786
ENSXETG00000026219	fau	0.94	793	1081	1978	3760	488	1620	1319.44	3206	1.97901
ENSXETG00000002224	xpo1	0.93	37	16	30	10	11	20.8	12.0706	25.1	1.20673
ENSXETG00000004299	nckap1l	0.93	3	1	4	7	0.5	3.1	2.60768	26.3	8.48387
ENSXETG00000004422	myo1a	0.93	5	1	34	4	1	9	14.089	36.8	4.08889
ENSXETG00000005234	stxbp3	0.93	19	31	41	12	23	25.2	11.1893	128	5.07937
ENSXETG00000010833	pgm1	0.93	45	26	27	44	451	118.6	186.036	251	2.11636
ENSXETG00000011187	tuba1c	0.93	343	156	162	75	48	156.8	115.355	2476	15.7908
ENSXETG00000016687	cdh6	0.93	37	0.6	3	1	0.1	8.34	16.0592	103	12.3501
ENSXETG00000016930	cep131	0.93	28	5	21	3	3	12	11.7047	1032	86
ENSXETG00000019484	ppid	0.93	68	26	30	29	58	42.2	19.3701	217	5.14218
ENSXETG00000027266	snrpb	0.93	60	56	86	56	22	56	22.7596	84.5	1.50893
ENSXETG00000029973	STXBP5L	0.93	242	0.4	3	0.1	0.1	49.12	107.83	0.279	0.00567997
ENSXETG00000004256	klhl22	0.92	31	16	21	5	35	21.6	11.9917	91.6	4.24074
ENSXETG00000007447	pgk1	0.92	517	323	198	44	1470	510.4	563.719	2831	5.54663
ENSXETG00000007653	zfyve26	0.92	2	4	11	1	1	3.8	4.20714	88.5	23.2895
ENSXETG00000007885	cdc5l	0.92	136	23	57	17	17	50	50.8724	371	7.42
ENSXETG00000011104	cyp2a13	0.92	1	3	17	3	1	5	6.78233	60.9	12.18
ENSXETG00000013252	mlh3	0.92	4	4	4	2	2	3.2	1.09545	0.457	0.142813
ENSXETG00000014001	actr2	0.92	245	76	175	75	40	122.2	85.1276	1322	10.8183
ENSXETG00000015425	esd	0.92	44	57	49	38	44	46.4	7.09225	62.9	1.3556
ENSXETG00000016956	pcnx4	0.92	33	10	17	3	3	13.2	12.498	1.81	0.137121
ENSXETG00000019702	gnal	0.92	46	26	56	9	9	29.2	21.3705	182	6.23288
ENSXETG00000023068	ppp6r2	0.92	20	23	26	8	12	17.8	7.56307	35.7	2.00562
ENSXETG00000024665	atp5f1b	0.92	719	2321	1158	426	2453	1415.4	925.59	1775	1.25406
ENSXETG00000027542	faap24	0.92	6	3	13	5	0.2	5.44	4.77158	107	19.6691
ENSXETG00000002059	mcm2	0.91	5	3	16	1	0.8	5.16	6.29508	131	25.3876
ENSXETG00000002566	sptbn4	0.91	9	3	5	0.9	2	3.98	3.18622	18.6	4.67337
ENSXETG00000003123	cdk1	0.91	0.2	0.9	41	6	0.3	9.68	17.6736	70.7	7.30372
ENSXETG00000003837	pura	0.91	75	23	35	27	7	33.4	25.3929	849	25.4192
ENSXETG00000003891	orc6	0.91	5	19	20	5	3	10.4	8.35464	218	20.9615
ENSXETG00000012215	hhex	0.91	1	4	13	37	0.7	11.14	15.2888	21.9	1.96589
ENSXETG00000013423	ttc26	0.91	5	6	24	5	4	8.8	8.52643	1685	191.477
ENSXETG00000015887	map2k1	0.91	702	66	142	31	115	211.2	277.706	68.6	0.324811
ENSXETG00000019288	tuba4b	0.91	63	23	105	90	508	157.8	198.231	1662	10.5323
ENSXETG00000019441	fxr1	0.91	79	99	57	14	321	114	119.946	87.2	0.764912
ENSXETG00000024077	lsm2	0.91	34	17	22	17	8	19.6	9.50263	381	19.4388
ENSXETG00000025466	slc25a5	0.91	1631	3248	1904	627	50	1492	1234.93	501	0.335791
ENSXETG00000027865	yars	0.91	41	10	14	12	5	16.4	14.1527	135	8.23171
ENSXETG00000001983	atg13	0.9	53	15	29	13	8	23.6	18.1879	250	10.5932
ENSXETG00000003203	hadhb	0.9	64	251	272	149	282	203.6	94.2619	92.9	0.456287
ENSXETG00000005613	ogdhl	0.9	97	0.5	99	21	0.2	43.54	50.4297	56.9	1.30684
ENSXETG00000007853	ENSXETG00000007853	0.9	26	14	38	4	3	17	14.9666	213	12.5294
ENSXETG00000008070	cpt2	0.9	19	32	69	25	27	34.4	19.8947	57.1	1.65988
ENSXETG00000008132	ankrd17	0.9	56	19	51	11	13	30	21.7256	0.743	0.0247667
ENSXETG00000009516	anp32c	0.9	48	46	126	53	25	59.6	38.6303	156	2.61745
ENSXETG00000010173	tmod1	0.9	2	276	5	1	36	64	119.396	781	12.2031
ENSXETG00000010354	nubp2	0.9	11	5	18	5	1	8	6.63325	115	14.375
ENSXETG00000012575	h3f3b	0.9	100	119	141	111	28	99.8	42.8567	3925	39.3287
ENSXETG00000013435	sdhb	0.9	232	206	262	90	242	206.4	68.1234	395	1.91376
ENSXETG00000017390	tpr	0.9	23	10	35	5	6	15.8	12.9112	40.7	2.57595
ENSXETG00000018689	smc3	0.9	70	25	73	16	14	39.6	29.433	12.5	0.315657
ENSXETG00000021043	gltpd2	0.9	0.6	1	13	47	0.2	12.36	20.097	118	9.54693
ENSXETG00000021760	capza2	0.9	162	111	122	56	280	146.2	83.8344	1776	12.1477
ENSXETG00000024263	ENSXETG00000024263	0.9	9	7	11	5	6	7.6	2.40832	128	16.8421
ENSXETG00000002108	arrdc4	0.89	6	3	21	13	11	10.8	6.94262	176	16.2963
ENSXETG00000010075	hyou1	0.89	10	7	21	12	4	10.8	6.45755	60.8	5.62963
ENSXETG00000013603	znf507	0.89	0.4	6	3	0.7	1	2.22	2.34563	27.6	12.4324
ENSXETG00000016057	tst	0.89	0.3	6	194	116	0.3	63.32	88.1491	143	2.25837
ENSXETG00000016974	ldhb	0.89	600	1927	327	52	255	632.2	749.934	1711	2.70642
ENSXETG00000017597	fancc	0.89	4	3	2	0.3	2	2.26	1.37405	48.5	21.4602
ENSXETG00000022887	abcb10	0.89	38	15	52	15	20	28	16.4165	154	5.5
ENSXETG00000027840	rpl36	0.89	829	1898	1464	2584	720	1499	773.53	4186	2.79253
ENSXETG00000002524	wars	0.88	27	10	9	4	7	11.4	9.01665	46.3	4.0614
ENSXETG00000003376	gdi1	0.88	664	53	35	5	10	153.4	286.093	113	0.736636
ENSXETG00000003610	myo6	0.88	10	2	83	4	3	20.4	35.1326	1295	63.4804
ENSXETG00000004179	limk2	0.88	22	6	19	5	2	10.8	9.03881	0.497	0.0460185
ENSXETG00000006662	plekho2	0.88	3	11	9	9	3	7	3.74166	1.82	0.26
ENSXETG00000010361	prdx4	0.88	91	25	86	81	24	61.4	33.8718	56.1	0.913681
ENSXETG00000011119	mxra8	0.88	17	16	50	2	8	18.6	18.5957	1.94	0.104301
ENSXETG00000011722	hnrnpk	0.88	277	133	156	103	57	145.2	82.4573	244	1.68044
ENSXETG00000011747	phip	0.88	10	8	9	3	3	6.6	3.36155	22.5	3.40909
ENSXETG00000013598	kif2c	0.88	0.8	0.1	30	0.2	7	7.62	12.8391	114	14.9606
ENSXETG00000014415	smarcd3	0.88	88	14	15	2	28	29.4	34.0265	50.8	1.72789
ENSXETG00000014723	htt	0.88	26	7	16	3	5	11.4	9.5551	2.15	0.188596
ENSXETG00000017362	fmo5	0.88	0.5	10	402	419	1	166.5	222.854	2.92	0.0175375
ENSXETG00000019410	pafah1b1	0.88	140	50	64	16	43	62.6	46.6562	65.1	1.03994
ENSXETG00000031460	ENSXETG00000031460	0.88	16	7	15	8	7	10.6	4.50555	125	11.7925
ENSXETG00000000635	atp13a1	0.87	23	7	30	11	4	15	11.068	13.6	0.906667
ENSXETG00000003375	fam50a	0.87	82	22	35	11	12	32.4	29.3649	601	18.5494
ENSXETG00000004521	rtn4	0.87	568	164	146	106	244	245.6	187.09	324	1.31922
ENSXETG00000005931	ptpru	0.87	71	17	19	8	7	24.4	26.5857	30.6	1.2541
ENSXETG00000011843	usp49	0.87	5	3	10	3	0.9	4.38	3.46006	18.7	4.26941
ENSXETG00000012210	wdhd1	0.87	7	3	10	3	2	5	3.39116	0.459	0.0918
ENSXETG00000013720	eif4a3	0.87	88	52	98	43	26	61.4	30.5254	74.6	1.21498
ENSXETG00000016826	mccc1	0.87	35	56	43	16	36	37.2	14.5155	166	4.46237
ENSXETG00000019845	vps9d1	0.87	18	4	8	3	4	7.4	6.22896	293	39.5946
ENSXETG00000022641	h3f3a	0.87	402	222	407	359	186	315.2	103.994	3925	12.4524
ENSXETG00000023145	hpf1	0.87	17	8	25	4	5	11.8	8.98332	4.9	0.415254
ENSXETG00000026434	chchd7	0.87	10	16	17	14	9	13.2	3.56371	349	26.4394
ENSXETG00000026776	rap1b	0.87	283	353	241	166	115	231.6	94.0308	137	0.591537
ENSXETG00000000629	wdr1	0.86	181	54	70	20	30	71	64.56	133	1.87324
ENSXETG00000007594	mrpl46	0.86	7	8	16	6	7	8.8	4.08656	122	13.8636
ENSXETG00000008405	ctnna1	0.86	18	100	92	23	18	50.2	41.9547	14.1	0.280876
ENSXETG00000008784	cops2	0.86	42	41	42	20	46	38.2	10.3537	53.4	1.39791
ENSXETG00000009506	cs	0.86	266	567	242	53	871	399.8	321.348	294	0.735368
ENSXETG00000010628	echdc1	0.86	8	9	25	9	8	11.8	7.39594	65.3	5.5339
ENSXETG00000010644	ppp3cc	0.86	94	24	47	14	45	44.8	30.8496	32.8	0.732143
ENSXETG00000017948	mta1	0.86	14	10	26	6	6	12.4	8.29458	178	14.3548
ENSXETG00000022984	ddx47	0.86	16	12	25	15	6	14.8	6.90652	197	13.3108
ENSXETG00000025105	ruvbl2	0.86	21	8	27	12	5	14.6	9.1815	187	12.8082
ENSXETG00000001903	tubgcp3	0.85	29	11	21	4	6	14.2	10.5688	1301	91.6197
ENSXETG00000002072	cherp	0.85	49	9	24	8	6	19.2	18.1301	909	47.3438
ENSXETG00000002123	dhx15	0.85	99	43	74	31	18	53	33.0379	79.3	1.49623
ENSXETG00000006635	pabpc1	0.85	786	528	1047	489	320	634	284.838	198	0.312303
ENSXETG00000007010	ywhaq	0.85	637	334	225	62	33	258.2	244.718	501	1.94036
ENSXETG00000007817	fem1b	0.85	7	3	15	2	2	5.8	5.54076	27.4	4.72414
ENSXETG00000009662	clspn	0.85	0.9	0.3	10	0.4	0.1	2.34	4.2922	26.5	11.3248
ENSXETG00000010259	csnk1g3	0.85	33	7	22	5	8	15	12.1037	34.9	2.32667
ENSXETG00000010448	prrc2c	0.85	21	8	32	3	7	14.2	12.0291	9.23	0.65
ENSXETG00000010536	bmp1	0.85	62	16	25	120	3	45.2	47.2197	0.793	0.0175442
ENSXETG00000011277	ANKRD11	0.85	14	14	18	5	4	11	6.16441	7.66	0.696364
ENSXETG00000012846	ugdh	0.85	13	8	24	4	4	10.6	8.35464	130	12.2642
ENSXETG00000014990	atxn2l	0.85	59	6	45	5	5	24	26.0384	112	4.66667
ENSXETG00000018971	camk2b	0.85	457	52	3	0.2	33	109.04	195.705	46.9	0.430117
ENSXETG00000019650	myh11	0.85	7	25	72	7	7	23.6	28.1567	26.8	1.13559
ENSXETG00000022259	prpf8	0.85	60	31	53	17	26	37.4	18.3112	167	4.46524
ENSXETG00000003285	stk11	0.84	39	16	24	8	15	20.4	11.8448	116	5.68627
ENSXETG00000009501	capns1	0.84	299	61	127	21	169	135.4	107.92	145	1.0709
ENSXETG00000013239	nek9	0.84	158	59	59	21	62	71.8	51.0754	119	1.65738
ENSXETG00000017534	hsd17b4	0.84	47	39	328	121	36	114.2	124.542	92.2	0.807356
ENSXETG00000020457	txndc5	0.84	33	42	157	206	9	89.4	86.6851	62.8	0.702461
ENSXETG00000022294	acacb	0.84	11	19	25	5	26	17.2	9.06642	16.3	0.947674
ENSXETG00000022735	ptprz1	0.84	147	0.1	0.3	0.2	0.3	29.58	65.6398	14.5	0.490196
ENSXETG00000015815	rps14	0.83	1146	2173	2491	3205	992	2001.4	931.183	9262	4.62776
ENSXETG00000016574	tbca	0.83	75	39	78	72	15	55.8	27.7074	341	6.11111
ENSXETG00000017150	h2afy2	0.83	57	25	50	23	25	36	16.1864	3.08	0.0855556
ENSXETG00000027832	ran	0.83	175	111	158	103	111	131.6	32.5853	885	6.72492
ENSXETG00000031818	ATG2A	0.83	31	15	36	8	11	20.2	12.518	20.4	1.0099
ENSXETG00000003623	psat1	0.82	49	2	14	3	2	14	20.2114	114	8.14286
ENSXETG00000011523	rtcb	0.82	94	32	56	41	34	51.4	25.6086	76.3	1.48444
ENSXETG00000015282	ptpn9	0.82	157	20	43	9	27	51.2	60.4169	1.36	0.0265625
ENSXETG00000017980	chmp3	0.82	41	24	43	17	14	27.8	13.4796	332	11.9424
ENSXETG00000019108	ckm	0.82	11	10363	2	15	80240	18126.2	35010.9	2849	0.157176
ENSXETG00000020609	pgghg	0.82	0.9	5	3	0.4	1	2.06	1.92042	2.41	1.1699
ENSXETG00000022688	nck1	0.82	20	11	34	6	6	15.4	11.8659	89.7	5.82468
ENSXETG00000022868	evi5l	0.82	2	8	24	1	2	7.4	9.68504	54.9	7.41892
ENSXETG00000025052	krt19	0.82	246	200	226	323	9	200.8	116.618	557	2.7739
ENSXETG00000027677	aldoc	0.82	3002	2303	98	2	31	1087.2	1450.55	1084	0.997057
ENSXETG00000001182	eef1a1	0.81	5159	10502	10500	9668	5637	8293.2	2670.09	1796	0.216563
ENSXETG00000005650	lyn	0.81	3	2	22	10	1	7.6	8.79204	87.9	11.5658
ENSXETG00000005824	tmed2	0.81	94	49	84	69	32	65.6	25.3041	282	4.29878
ENSXETG00000006391	eef2.1	0.81	2820	3567	4144	2387	2237	3031	808.665	383	0.126361
ENSXETG00000017317	rpn2	0.81	186	45	128	122	33	102.8	63.5193	62.7	0.609922
ENSXETG00000018551	lbr	0.81	5	14	26	12	16	14.6	7.60263	1.86	0.127397
ENSXETG00000019456	slc3a2	0.81	270	79	529	167	28	214.6	198.362	72.6	0.338304
ENSXETG00000001888	appl2	0.8	66	21	19	8	12	25.2	23.403	0.956	0.0379365
ENSXETG00000003433	pgam1	0.8	841	267	118	27	18	254.2	342.95	1978	7.78127
ENSXETG00000005183	cd276	0.8	8	6	18	3	3	7.6	6.1887	10.6	1.39474
ENSXETG00000008193	pcna	0.8	67	39	120	32	12	54	41.827	873	16.1667
ENSXETG00000008437	gnpda2	0.8	30	9	9	3	4	11	10.9772	93.1	8.46364
ENSXETG00000008703	mmp9	0.8	6	16	52	118	4	39.2	48.0957	78.7	2.00765
ENSXETG00000009521	armc9	0.8	18	0.8	14	1	0.2	6.8	8.52174	28.7	4.22059
ENSXETG00000025740	slc25a4	0.8	5	4028	2	5	4517	1711.4	2344.34	123	0.071871
ENSXETG00000026836	ctif	0.8	42	8	16	2	11	15.8	15.4984	96.6	6.11392
ENSXETG00000003569	kars	0.79	67	75	95	46	76	71.8	17.7116	44.1	0.614206
ENSXETG00000003760	setd1b	0.79	1	3	8	0.7	1	2.74	3.08026	102	37.2263
ENSXETG00000009190	tbrg1	0.79	22	16	23	10	6	15.4	7.4027	143	9.28571
ENSXETG00000011876	etf1	0.79	58	28	63	17	36	40.4	19.6291	47	1.16337
ENSXETG00000012362	zbtb2	0.79	11	7	16	6	5	9	4.52769	969	107.667
ENSXETG00000013342	lima1	0.79	19	9	112	27	3	34	44.5646	154	4.52941
ENSXETG00000018476	klf3	0.79	8	17	13	22	4	12.8	7.12039	256	20
ENSXETG00000022169	cenps	0.79	2	6	6	2	3	3.8	2.04939	590	155.263
ENSXETG00000027354	snrpd1	0.79	35	20	37	27	8	25.4	11.8448	467	18.3858
ENSXETG00000001671	taldo1	0.78	93	85	166	209	7	112	78.1665	373	3.33036
ENSXETG00000004468	gse1	0.78	46	16	38	7	8	23	17.9165	204	8.86957
ENSXETG00000008530	phgdh	0.78	145	0.4	33	6	0.1	36.9	61.9317	145	3.92954
ENSXETG00000012170	hnrnpa2b1	0.78	802	152	397	139	167	331.4	283.724	458	1.38202
ENSXETG00000018606	fam222a	0.78	4	7	17	3	0.4	6.28	6.44143	132	21.0191
ENSXETG00000022971	st13	0.78	136	136	162	77	80	118.2	37.7783	425	3.5956
ENSXETG00000024519	ENSXETG00000024519	0.78	7	4	5	2	1	3.8	2.38747	9.44	2.48421
ENSXETG00000026777	scly	0.78	15	3	9	5	2	6.8	5.31037	12	1.76471
ENSXETG00000001209	rps7	0.77	1030	2456	3165	4886	1044	2516.2	1613.74	173	0.0687545
ENSXETG00000004167	shroom1	0.77	26	5	43	23	0.3	19.46	17.2165	8.84	0.454265
ENSXETG00000004811	rbsn	0.77	23	10	19	2	11	13	8.21584	38.6	2.96923
ENSXETG00000005678	RB1CC1	0.77	15	9	11	5	4	8.8	4.49444	256	29.0909
ENSXETG00000010192	pde4dip	0.77	34	312	5	1	176	105.6	135.78	0.641	0.00607008
ENSXETG00000015913	sqstm1	0.77	106	94	151	102	61	102.8	32.2444	121	1.17704
ENSXETG00000016576	slc25a13	0.77	40	46	56	36	3	36.2	20.03	52.2	1.44199
ENSXETG00000020075	trrap	0.77	18	5	16	2	3	8.8	7.59605	29	3.29545
ENSXETG00000022264	tubgcp6	0.77	15	6	11	3	3	7.6	5.27257	47.2	6.21053
ENSXETG00000024836	rps27	0.77	32	31	90	173	34	72	61.7454	2984	41.4444
ENSXETG00000003506	urod	0.76	33	8	16	13	16	17.2	9.41807	135	7.84884
ENSXETG00000007428	cpne1	0.76	41	36	65	22	24	37.6	17.2714	4.55	0.121011
ENSXETG00000016167	uba3	0.76	88	30	35	15	16	36.8	29.9115	60.5	1.64402
ENSXETG00000017933	actn1	0.76	66	30	103	25	11	47	37.3028	169	3.59574
ENSXETG00000019265	supt6h	0.76	44	23	42	12	14	27	15.1987	1.01	0.0374074
ENSXETG00000024628	hbg2	0.76	170	397	920	1132	133	550.4	452.029	215	0.390625
ENSXETG00000030485	ENSXETG00000030485	0.76	3	0.8	4	2	2	2.36	1.20333	60.6	25.678
ENSXETG00000000002	eaf2	0.75	25	13	68	22	31	31.8	21.2532	65.9	2.07233
ENSXETG00000000109	rps12	0.75	1612	1722	3279	7013	733	2871.8	2489.93	204	0.0710356
ENSXETG00000000321	calm2	0.75	1701	109	372	134	239	511	673.264	1330	2.60274
ENSXETG00000002270	sirt5	0.75	106	129	97	39	105	95.2	33.6036	123	1.29202
ENSXETG00000002712	soga1	0.75	26	14	11	2	2	11	9.94987	77.4	7.03636
ENSXETG00000003602	eif3e	0.75	272	457	384	389	283	357	78.1889	42.6	0.119328
ENSXETG00000004674	eef1d	0.75	191	180	224	405	90	218	115.717	149	0.683486
ENSXETG00000005087	polk	0.75	5	5	6	2	2	4	1.87083	42.5	10.625
ENSXETG00000014668	virma	0.75	27	9	24	5	5	14	10.6771	0.343	0.0245
ENSXETG00000018150	rpl36a	0.75	1166	1392	1973	3160	492	1636.6	1003.16	10456	6.38885
ENSXETG00000018428	got1	0.75	266	241	324	60	528	283.8	168.438	460	1.62086
ENSXETG00000025032	mmp15	0.75	39	41	17	3	6	21.2	17.9499	3.22	0.151887
ENSXETG00000027588	serpinb6	0.75	19	16	30	37	5	21.4	12.4619	114	5.3271
ENSXETG00000033884	ENSXETG00000033884	0.75	44	12	42	10	11	23.8	17.5556	409	17.1849
ENSXETG00000002770	wbp11	0.74	88	20	44	12	13	35.4	32.1216	332	9.37853
ENSXETG00000010878	rpl10	0.74	2139	1946	3309	5087	1196	2735.4	1517.2	934	0.341449
ENSXETG00000011158	pcdh18	0.74	22	3	12	2	2	8.2	8.78635	108	13.1707
ENSXETG00000014846	or51e1	0.74	1	0.3	16	2	1	4.06	6.70209	179	44.0887
ENSXETG00000016904	hpgd	0.74	8	78	27	35	5	30.6	29.3479	103	3.36601
ENSXETG00000017009	n4bp2l1	0.74	22	5	20	25	2	14.8	10.5214	95.3	6.43919
ENSXETG00000018090	dlg5	0.74	9	9	21	2	6	9.4	7.09225	1	0.106383
ENSXETG00000022253	PLXNB2	0.74	21	30	39	11	3	20.8	14.3944	0.556	0.0267308
ENSXETG00000023097	ENSXETG00000023097	0.74	3	0.4	20	19	0.2	8.52	10.0902	81.1	9.51878
ENSXETG00000023205	fkbp8	0.74	57	14	26	11	3	22.2	21.1353	5.2	0.234234
ENSXETG00000000368	sec31a	0.73	40	13	32	19	5	21.8	14.1669	4.54	0.208257
ENSXETG00000010094	tyw1	0.73	12	8	17	6	8	10.2	4.38178	57.7	5.65686
ENSXETG00000022133	u2surp	0.73	89	35	73	38	18	50.6	29.3309	1523	30.0988
ENSXETG00000027492	dapl1	0.73	62	127	266	195	71	144.2	86.3522	1769	12.2677
ENSXETG00000000349	chd9	0.72	11	6	19	4	4	8.8	6.37966	22.1	2.51136
ENSXETG00000002257	ptprf	0.72	59	13	48	8	2	26	25.7002	29.7	1.14231
ENSXETG00000002877	prmt1	0.72	249	115	147	30	59	120	85.4634	188	1.56667
ENSXETG00000004078	nfrkb	0.72	51	15	35	12	15	25.6	16.9056	35.2	1.375
ENSXETG00000004548	xrcc6	0.72	22	13	34	8	10	17.4	10.7145	125	7.18391
ENSXETG00000005258	oscp1	0.72	46	3	10	0.7	2	12.34	19.158	91.8	7.43922
ENSXETG00000006328	adsl	0.72	120	86	48	19	159	86.4	55.7162	71.5	0.827546
ENSXETG00000009104	mcm7	0.72	10	3	60	7	2	16.4	24.5825	187	11.4024
ENSXETG00000012569	hnrnpd	0.72	176	101	85	62	74	99.6	45.0589	501	5.03012
ENSXETG00000017318	src	0.72	35	5	72	9	8	25.8	28.5079	1.43	0.0554264
ENSXETG00000018809	rps16	0.72	1048	1967	2942	3756	812	2105	1248.45	14588	6.93017
ENSXETG00000031332	CPNE8	0.72	32	4	5	5	6	10.4	12.0955	3.88	0.373077
ENSXETG00000000253	mcm5	0.71	2	1	10	1	0.2	2.84	4.05315	179	63.0282
ENSXETG00000001192	ncor2	0.71	22	19	35	6	6	17.6	12.1778	21.8	1.23864
ENSXETG00000002121	ccdc149	0.71	10	6	7	1	3	5.4	3.50714	71.6	13.2593
ENSXETG00000003912	rpl27a	0.71	614	2004	1747	2723	653	1548.2	908.507	190	0.122723
ENSXETG00000003981	cat.2	0.71	96	109	1773	1415	56	689.8	835.294	1945	2.81966
ENSXETG00000010651	ppib	0.71	236	56	331	248	16	177.4	134.907	869	4.89853
ENSXETG00000011978	psma3	0.71	64	97	74	45	70	70	18.7483	461	6.58571
ENSXETG00000015347	tgfb2	0.71	5	22	8	2	3	8	8.15475	370	46.25
ENSXETG00000016819	btf3	0.71	409	498	698	786	320	542.2	195.436	198	0.365179
ENSXETG00000016824	arhgef28	0.71	3	2	29	8	1	8.6	11.7175	0.506	0.0588372
ENSXETG00000017697	birc6	0.71	15	10	22	4	6	11.4	7.26636	35.1	3.07895
ENSXETG00000018598	hira	0.71	22	12	31	14	8	17.4	9.15423	603	34.6552
ENSXETG00000019166	hmgb1	0.71	424	340	208	135	62	233.8	147.815	550	2.35244
ENSXETG00000025399	PPIG	0.71	39	22	42	16	24	28.6	11.3049	95.7	3.34615
ENSXETG00000027344	rpsa	0.71	2089	3028	3517	3935	2183	2950.4	810.464	391	0.132524
ENSXETG00000000782	anapc1	0.7	14	2	11	3	4	6.8	5.35724	58.5	8.60294
ENSXETG00000001784	cse1l	0.7	50	14	41	8	24	27.4	17.7708	261	9.52555
ENSXETG00000001886	aldh1l2	0.7	19	9	3	4	11	9.2	6.41872	266	28.913
ENSXETG00000004314	cdk5rap1	0.7	12	6	12	6	4	8	3.74166	80.2	10.025
ENSXETG00000004516	ccdc88a	0.7	8	2	10	0.5	1	4.3	4.38178	14.4	3.34884
ENSXETG00000004763	prdx2	0.7	167	35	98	122	75	99.4	49.5611	1896	19.0744
ENSXETG00000006656	clpx	0.7	42	66	97	30	85	64	28.1691	72.4	1.13125
ENSXETG00000006720	ncor1	0.7	64	24	43	18	15	32.8	20.5597	664	20.2439
ENSXETG00000008151	glud1	0.7	114	42	360	247	55	163.6	136.537	33	0.201711
ENSXETG00000008477	nphp3	0.7	3	2	14	1	0.9	4.18	5.55536	251	60.0478
ENSXETG00000011490	col6a2	0.7	6	33	68	4	32	28.6	25.9769	64.1	2.24126
ENSXETG00000015701	ENSXETG00000015701	0.7	7	4	6	2	4	4.6	1.94936	0.607	0.131957
ENSXETG00000021999	ak1	0.7	138	63	9	4	901	223	382.84	475	2.13004
ENSXETG00000023201	rex1bd	0.7	67	33	45	24	35	40.8	16.4378	194	4.7549
ENSXETG00000002980	dtymk	0.69	60	10	16	6	4	19.2	23.2637	237	12.3438
ENSXETG00000005162	lmnb1	0.69	16	8	87	11	5	25.4	34.6742	37.2	1.46457
ENSXETG00000006009	prdx5	0.69	187	165	178	70	110	142	50.1448	2621	18.4577
ENSXETG00000006892	aco2	0.69	311	960	210	35	961	495.4	435.907	139	0.280581
ENSXETG00000007227	syne2	0.69	0.2	2	4	0.2	0.4	1.36	1.65771	0.62	0.455882
ENSXETG00000007339	hdac2	0.69	134	21	38	13	37	48.6	48.9111	117	2.40741
ENSXETG00000010059	vkorc1l1	0.69	9	2	13	3	1	5.6	5.17687	103	18.3929
ENSXETG00000014743	srcin1	0.69	74	0.8	18	0.3	0.4	18.7	31.8294	98.7	5.27807
ENSXETG00000020273	mtfr1	0.69	9	3	17	5	4	7.6	5.72713	207	27.2368
ENSXETG00000025061	capza1	0.69	62	38	62	30	142	66.8	44.3982	794	11.8862
ENSXETG00000005197	cenpa	0.68	12	8	36	13	2	14.2	12.9306	16.8	1.1831
ENSXETG00000008422	sf3b2	0.68	32	24	44	19	8	25.4	13.5573	201	7.91339
ENSXETG00000010241	eif3a	0.68	177	93	265	103	98	147.2	74.2913	184	1.25
ENSXETG00000011494	ftcd	0.68	2	1	562	62	0.2	125.44	245.467	534	4.25702
ENSXETG00000014268	flna	0.68	99	110	272	39	40	112	95.2444	146	1.30357
ENSXETG00000015654	tkt	0.68	149	35	170	133	7	98.8	72.8986	196	1.98381
ENSXETG00000019390	eif4a2	0.68	196	85	68	28	49	85.2	65.4882	646	7.58216
ENSXETG00000021382	katna1	0.68	10	8	23	6	4	10.2	7.49667	41.6	4.07843
ENSXETG00000004455	phf3	0.67	2	4	4	3	1	2.8	1.30384	0.509	0.181786
ENSXETG00000005477	ubxn1	0.67	97	95	92	72	89	89	9.97497	150	1.68539
ENSXETG00000011186	tuba1b	0.67	1351	42	63	2	11	293.8	591.495	2996	10.1974
ENSXETG00000013094	agtrap	0.67	1	2	12	5	2	4.4	4.50555	144	32.7273
ENSXETG00000013436	ybx1	0.67	1013	2201	2115	4764	2250	2468.6	1381.31	535	0.216722
ENSXETG00000014405	ap5z1	0.67	64	8	35	7	7	24.2	25.2725	96.6	3.99174
ENSXETG00000015463	fbxl3	0.67	30	19	50	12	8	23.8	16.8582	56.5	2.37395
ENSXETG00000015477	ddx3x	0.67	483	168	373	100	116	248	170.718	57.4	0.231452
ENSXETG00000016379	cdh1	0.67	2	2	112	62	0.1	35.62	50.1301	6.98	0.195957
ENSXETG00000016838	hspa5	0.67	131	21	95	127	18	78.4	55.559	4746	60.5357
ENSXETG00000017385	kif1c	0.67	24	43	59	10	114	50	40.3175	51.1	1.022
ENSXETG00000018961	ENSXETG00000018961	0.67	26	11	31	3	4	15	12.8258	312	20.8
ENSXETG00000027478	anxa1	0.67	35	126	266	72	44	108.6	94.8778	246	2.26519
ENSXETG00000000849	erlin1	0.66	25	42	48	22	26	32.6	11.6103	43	1.31902
ENSXETG00000002765	twf2	0.66	65	32	37	15	23	34.4	19.0735	25.1	0.729651
ENSXETG00000003999	rrm1	0.66	14	4	68	3	1	18	28.3989	204	11.3333
ENSXETG00000004630	dcxr	0.66	14	14	110	24	6	33.6	43.1833	122	3.63095
ENSXETG00000007252	pik3ca	0.66	1	2	5	1	2	2.2	1.64317	85.5	38.8636
ENSXETG00000009802	rpl21	0.66	1290	2249	2324	4496	1232	2318.2	1321.43	1195	0.515486
ENSXETG00000011228	tk2	0.66	22	5	10	4	2	8.6	8.04984	106	12.3256
ENSXETG00000017204	supt16h	0.66	66	23	52	17	13	34.2	23.4457	109	3.18713
ENSXETG00000018137	rps24	0.66	658	1818	2017	2764	727	1596.8	898.019	2329	1.45854
ENSXETG00000020940	arpc3	0.66	92	55	76	64	14	60.2	29.3121	763	12.6744
ENSXETG00000022163	kif1b	0.66	14	10	5	1	10	8	5.04975	121	15.125
ENSXETG00000001880	arhgap26	0.65	11	5	8	3	2	5.8	3.70135	25.6	4.41379
ENSXETG00000002726	iars2	0.65	32	23	22	9	20	21.2	8.228	80.3	3.78774
ENSXETG00000002970	pigk	0.65	40	14	16	9	5	16.8	13.6638	386	22.9762
ENSXETG00000004049	ankrd12	0.65	21	7	13	5	4	10	7.07107	18.4	1.84
ENSXETG00000004205	ywhah	0.65	1209	66	45	38	126	296.8	511.109	134	0.451482
ENSXETG00000007175	ubl4a	0.65	51	23	28	17	23	28.4	13.2212	135	4.75352
ENSXETG00000008921	parp12	0.65	11	2	5	4	2	4.8	3.70135	70.5	14.6875
ENSXETG00000011938	prpf19	0.65	38	17	17	10	11	18.6	11.327	1035	55.6452
ENSXETG00000013175	gca	0.65	167	92	103	29	37	85.6	55.9804	317	3.70327
ENSXETG00000021323	ube2d3	0.65	302	212	205	161	86	193.2	78.8334	278	1.43892
ENSXETG00000023924	tpi1	0.65	783	402	499	370	1730	756.8	567.839	7407	9.78726
ENSXETG00000001257	purb	0.64	89	41	81	9	31	50.2	33.9293	509	10.1394
ENSXETG00000005754	shmt1	0.64	20	10	488	76	15	121.8	206.439	167	1.3711
ENSXETG00000009707	spata13	0.64	20	3	55	6	0.8	16.96	22.5413	6.85	0.403892
ENSXETG00000011221	eif2s1	0.64	62	65	74	53	54	61.6	8.61974	96.1	1.56006
ENSXETG00000011551	aldh1l1	0.64	3	1	33	0.1	11	9.62	13.7594	144	14.9688
ENSXETG00000014661	tpt1	0.64	1385	3173	2867	2955	2676	2611.2	708.346	133	0.0509344
ENSXETG00000015598	zfr	0.64	85	23	30	12	11	32.2	30.5565	21.8	0.677019
ENSXETG00000017308	dlgap4	0.64	150	2	7	2	2	32.6	65.6643	285	8.74233
ENSXETG00000001258	h2afv	0.63	74	28	75	37	11	45	28.5044	4028	89.5111
ENSXETG00000008803	atf5	0.63	21	35	46	32	201	67	75.4354	3.74	0.0558209
ENSXETG00000010544	xpo7	0.63	53	24	57	16	16	33.2	20.2163	20.6	0.620482
ENSXETG00000011897	eno1	0.63	1951	612	518	165	177	684.6	735.601	8316	12.1472
ENSXETG00000013728	csnk2a2	0.63	85	53	74	32	106	70	28.592	65.2	0.931429
ENSXETG00000015503	il6st	0.63	2	11	15	5	4	7.4	5.41295	0.882	0.119189
ENSXETG00000018692	adarb1	0.63	42	6	11	4	1	12.8	16.7242	123	9.60938
ENSXETG00000022527	strap	0.63	109	29	56	15	34	48.6	36.8416	81.2	1.67078
ENSXETG00000002229	kiaa1958	0.62	2	1	2	0.3	1	1.26	0.733485	181	143.651
ENSXETG00000003836	hnrnpab	0.62	324	168	279	136	68	195	104.924	191	0.979487
ENSXETG00000004472	mcts1	0.62	54	42	52	37	33	43.6	9.1815	308	7.06422
ENSXETG00000008976	mdh2	0.62	341	1630	529	181	1684	873	726.463	1071	1.2268
ENSXETG00000009564	bub3	0.62	25	14	46	13	9	21.4	14.9766	83	3.8785
ENSXETG00000012696	vat1l	0.62	238	1	3	2	0.3	48.86	105.737	52	1.06427
ENSXETG00000012911	actc1	0.62	0.9	8569	0.4	5	477	1810.46	3783.73	11545	6.37683
ENSXETG00000013020	wdpcp	0.62	3	0.5	3	0.1	0.2	1.36	1.50433	53.5	39.3382
ENSXETG00000019014	ube2d4	0.62	18	60	13	5	79	35	32.5346	144	4.11429
ENSXETG00000021417	acta1	0.62	17	20708	1	28	88758	21902.4	38432.5	11009	0.502639
ENSXETG00000023919	phb2	0.62	111	142	182	134	108	135.4	29.8463	188	1.38848
ENSXETG00000027987	acp1	0.62	57	71	50	55	35	53.6	12.9923	93	1.73507
ENSXETG00000004190	patz1	0.61	37	18	22	14	11	20.4	10.1637	91.5	4.48529
ENSXETG00000010528	ppp3cb	0.61	235	56	62	6	31	78	90.529	9.53	0.122179
ENSXETG00000013246	extl2	0.61	18	10	26	17	11	16.4	6.42651	1.54	0.0939024
ENSXETG00000013480	ap2b1	0.61	282	19	50	14	5	74	117.501	64.7	0.874324
ENSXETG00000014250	arf1	0.61	532	266	454	175	249	335.2	150.604	231	0.689141
ENSXETG00000016054	mpst	0.61	26	57	161	42	34	64	55.4211	82.8	1.29375
ENSXETG00000022821	rasal2	0.61	31	19	22	3	4	15.8	12.0706	122	7.72152
ENSXETG00000024084	tubb	0.61	1265	98	131	52	38	316.8	531.349	6795	21.4489
ENSXETG00000026942	rplp0	0.61	1793	2946	2974	4697	1888	2859.6	1170.28	3761	1.31522
ENSXETG00000033109	ENSXETG00000033109	0.61	0.5	0.1	4	0.6	0.1	1.06	1.65922	83.4	78.6792
ENSXETG00000001808	nfe2l2	0.6	53	58	153	62	10	67.2	52.3135	403	5.99702
ENSXETG00000008670	abhd6	0.6	41	6	28	16	4	19	15.5563	72.7	3.82632
ENSXETG00000011174	arf3	0.6	189	24	10	4	2	45.8	80.5121	231	5.04367
ENSXETG00000016842	arpc5l	0.6	106	27	46	22	41	48.4	33.6645	504	10.4132
ENSXETG00000018265	ppp5c	0.6	61	28	30	16	30	33	16.7033	43.4	1.31515
ENSXETG00000021089	uchl1	0.6	289	60	60	0.1	8	83.42	118.312	288	3.45241
ENSXETG00000022129	wasl	0.6	35	25	35	10	8	22.6	13.0882	160	7.07965
ENSXETG00000024088	abcf1	0.6	36	22	27	15	27	25.4	7.70065	52.9	2.08268
ENSXETG00000026571	mrpl30	0.6	14	30	22	17	9	18.4	8.01873	422	22.9348
ENSXETG00000034057	ENSXETG00000034057	0.6	0.6	0.7	9	0.5	0.3	2.22	3.79302	45	20.2703
ENSXETG00000003871	thrb	0.59	0.3	2	3	0.3	1	1.32	1.16919	205	155.303
ENSXETG00000007583	march7	0.59	45	11	43	7	26	26.4	17.5727	30.2	1.14394
ENSXETG00000010717	sash1	0.59	1	0.8	4	0.2	0.8	1.36	1.50599	85.7	63.0147
ENSXETG00000013439	ppih	0.59	17	13	35	28	4	19.4	12.2597	17.3	0.891753
ENSXETG00000015753	vps45	0.59	132	24	34	11	5	41.2	51.9971	131	3.17961
ENSXETG00000018337	ankhd1	0.59	15	11	38	7	11	16.4	12.4016	0.806	0.0491463
ENSXETG00000025319	rpl38	0.59	1082	1579	2039	4154	720	1914.8	1347.53	10047	5.24702
ENSXETG00000026897	nutf2	0.59	74	48	71	41	47	56.2	15.1559	180	3.20285
ENSXETG00000000525	prdx6	0.58	50	126	346	258	77	171.4	126.19	451	2.63127
ENSXETG00000008793	sri	0.58	101	70	121	88	24	80.8	36.8062	325	4.02228
ENSXETG00000016497	mphosph10	0.58	19	13	17	9	6	12.8	5.4037	108	8.4375
ENSXETG00000017985	anxa3	0.58	16	58	91	10	9	36.8	36.4376	789	21.4402
ENSXETG00000021713	prpf40a	0.58	34	34	46	17	26	31.4	10.761	299	9.52229
ENSXETG00000023560	cyb5a	0.58	31	22	393	80	14	108	161.377	255	2.36111
ENSXETG00000024773	apex1	0.58	26	13	18	7	8	14.4	7.82943	101	7.01389
ENSXETG00000009315	metap1	0.57	15	15	18	6	41	19	13.0958	90.9	4.78421
ENSXETG00000012856	rpl9	0.57	1211	1770	2564	3689	1222	2091.2	1049.99	745	0.356255
ENSXETG00000015289	anxa2	0.57	61	114	218	23	43	91.8	78.2349	57.3	0.624183
ENSXETG00000016592	psmb8	0.57	4	11	7	19	4	9	6.2849	27.9	3.1
ENSXETG00000020770	dmxl2	0.57	43	5	7	3	1	11.8	17.5841	19.7	1.66949
ENSXETG00000031626	ENSXETG00000031626	0.56	12	34	43	2	3	18.8	18.6735	81	4.30851
ENSXETG00000001868	atp5f1c	0.55	217	1140	421	205	901	576.8	422.571	271	0.469834
ENSXETG00000002715	ENSXETG00000002715	0.55	3	7	13	4	19	9.2	6.72309	633	68.8043
ENSXETG00000005283	fam83h	0.55	13	5	30	3	2	10.6	11.6748	31.3	2.95283
ENSXETG00000006417	mre11	0.55	9	4	7	3	5	5.6	2.40832	662	118.214
ENSXETG00000008628	psmc6	0.55	76	47	58	29	37	49.4	18.4201	432	8.74494
ENSXETG00000009275	thada	0.55	3	2	7	0.8	1	2.76	2.52745	11.7	4.23913
ENSXETG00000009522	psmd1	0.55	119	56	51	25	50	60.2	35.01	209	3.47176
ENSXETG00000010442	clns1a	0.55	124	33	69	40	25	58.2	40.3572	133	2.28522
ENSXETG00000013210	dbt	0.55	32	34	22	14	18	24	8.7178	51.8	2.15833
ENSXETG00000013538	rpa1	0.55	38	15	37	6	5	20.2	16.2696	236	11.6832
ENSXETG00000013784	polr2c	0.55	34	19	26	16	9	20.8	9.57601	945	45.4327
ENSXETG00000015898	rpl4	0.55	1716	3069	3420	4035	2143	2876.6	943.312	1716	0.596538
ENSXETG00000016092	ppp2ca	0.55	208	60	128	42	44	96.4	71.5598	564	5.85062
ENSXETG00000017975	kdm3a	0.55	44	15	60	9	24	30.4	21.1967	39.9	1.3125
ENSXETG00000018088	idi1	0.55	51	25	24	14	86	40	29.129	76.8	1.92
ENSXETG00000018767	slc25a3	0.55	484	2994	905	338	2033	1350.8	1133.73	780	0.577436
ENSXETG00000021714	rtkn	0.55	105	10	40	5	37	39.4	39.866	1.8	0.0456853
ENSXETG00000022458	glod4	0.55	56	12	27	9	12	23.2	19.6392	96.7	4.1681
ENSXETG00000023383	znf148	0.55	54	6	30	4	7	20.2	21.661	459	22.7228
ENSXETG00000025884	psma6	0.55	149	79	109	82	86	101	29.3172	234	2.31683
ENSXETG00000002017	gstm1	0.54	140	75	912	189	128	288.8	350.73	602	2.08449
ENSXETG00000005350	ptprs	0.54	69	14	31	12	11	27.4	24.6435	30.6	1.11679
ENSXETG00000012374	rpl10a	0.54	442	1465	1376	2261	665	1241.8	720.933	1246	1.00338
ENSXETG00000013995	cct5	0.54	161	118	114	42	127	112.4	43.4891	730	6.49466
ENSXETG00000015502	med14	0.54	19	7	26	5	5	12.4	9.58123	160	12.9032
ENSXETG00000015793	kdm2a	0.54	18	9	16	4	6	10.6	6.14817	1.5	0.141509
ENSXETG00000015797	ccdc88c	0.54	1	0.9	8	5	0.4	3.06	3.32235	9.11	2.97712
ENSXETG00000016179	h2afj	0.54	50	28	57	7	32	34.8	19.6901	9816	282.069
ENSXETG00000016202	psmd14	0.54	89	38	49	20	49	49	25.3081	93.3	1.90408
ENSXETG00000016239	ybx3	0.54	4	2	0.1	6	22379	4478.22	10006.8	189	0.0422043
ENSXETG00000019275	des.1	0.54	5	1541	162	55	1154	583.4	713.077	192	0.329105
ENSXETG00000023804	gfra1	0.54	82	2	18	0.4	2	20.88	34.9152	129	6.17816
ENSXETG00000024918	snrpd3	0.54	55	47	102	80	17	60.2	32.4299	441	7.32558
ENSXETG00000034136	PYGM	0.54	0.6	2	0.7	0.2	3082	617.1	1377.92	672	1.08896
ENSXETG00000000088	abhd14b	0.53	4	4	194	141	4	69.4	91.4921	217	3.1268
ENSXETG00000007897	h2afy	0.53	117	18	32	16	26	41.8	42.5229	3.6	0.0861244
ENSXETG00000009030	rps9	0.53	1156	1865	2342	3594	855	1962.4	1083.09	3010	1.53384
ENSXETG00000009446	suox	0.53	9	8	20	37	1	15	14.0535	97.7	6.51333
ENSXETG00000011160	ppp3ca	0.53	264	18	25	13	63	76.6	106.589	35.8	0.467363
ENSXETG00000012869	sptan1	0.53	353	193	128	26	26	145.2	136.179	9.95	0.0685262
ENSXETG00000022613	aldh18a1	0.53	54	16	15	4	39	25.6	20.3544	359	14.0234
ENSXETG00000025765	ap2a2	0.53	291	51	59	46	70	103.4	105.263	57.2	0.553191
ENSXETG00000033070	DLG3	0.53	85	2	17	5	0.6	21.92	35.8501	1	0.0456204
ENSXETG00000006439	enc1.2	0.52	21	6	40	23	0.6	18.12	15.5297	94.8	5.23179
ENSXETG00000007798	rsrc2	0.52	75	30	37	23	23	37.6	21.6979	91.8	2.44149
ENSXETG00000012470	frg1	0.52	27	34	36	23	10	26	10.3682	178	6.84615
ENSXETG00000019567	eef1a2	0.52	1076	347	36	2	3310	954.2	1385.92	2518	2.63886
ENSXETG00000022533	intu	0.52	7	3	8	0.1	1	3.82	3.53723	47.7	12.4869
ENSXETG00000025727	psma5	0.52	53	61	42	69	43	53.6	11.6103	402	7.5
ENSXETG00000027221	ENSXETG00000027221	0.52	11	25	5	2	67	22	26.6646	235	10.6818
ENSXETG00000000787	tubgcp2	0.51	15	5	9	4	2	7	5.14782	794	113.429
ENSXETG00000001794	timm13	0.51	42	105	44	16	79	57.2	34.8669	277	4.84266
ENSXETG00000004743	cdc42	0.51	327	113	219	87	34	156	116.944	500	3.20513
ENSXETG00000011530	akr1b1	0.51	102	62	87	41	96	77.6	25.5206	184	2.37113
ENSXETG00000012655	ENSXETG00000012655	0.51	6	16	30	18	4	14.8	10.4499	100	6.75676
ENSXETG00000023016	b4galt4	0.51	18	5	26	4	4	11.4	10.0896	138	12.1053
ENSXETG00000004411	hsd17b6	0.5	37	96	353	351	17	170.8	167.944	1.95	0.0114169
ENSXETG00000010896	hsp90ab1	0.5	2399	534	1241	275	665	1022.8	846.713	2103	2.05612
ENSXETG00000012863	set	0.5	296	192	298	158	76	204	94.7945	95.7	0.469118
ENSXETG00000014144	rpl13a	0.5	841	1888	2148	3366	1073	1863.2	1001.18	230	0.123444
ENSXETG00000025457	rpl7	0.5	1547	2503	3548	4035	1602	2647	1124.85	2055	0.776351
ENSXETG00000000543	gldc	0.49	17	7	64	42	0.7	26.14	26.3723	203	7.76588
ENSXETG00000006271	hps6	0.49	18	5	17	3	3	9.2	7.62889	75.5	8.20652
ENSXETG00000008408	canx	0.49	161	48	147	43	18	83.4	65.63	119	1.42686
ENSXETG00000011317	tnfrsf21	0.49	97	4	13	2	4	24	41.0305	1.08	0.045
ENSXETG00000017214	ppm1j	0.49	0.9	2	3	2	1	1.78	0.861394	2.73	1.53371
ENSXETG00000022673	pgm3	0.49	10	4	18	9	2	8.6	6.22896	82.5	9.59302
ENSXETG00000022900	grpel1	0.49	17	11	18	12	5	12.6	5.22494	217	17.2222
ENSXETG00000003052	fkbp3	0.48	33	36	34	21	36	32	6.2849	130	4.0625
ENSXETG00000006325	zdhhc8	0.48	12	12	17	5	6	10.4	4.9295	106	10.1923
ENSXETG00000008404	hspa9	0.48	94	150	118	64	84	102	33.1361	78.6	0.770588
ENSXETG00000008820	ddb1	0.48	141	55	64	23	79	72.4	43.4833	1177	16.2569
ENSXETG00000009049	far1	0.48	130	33	88	25	51	65.4	43.5121	273	4.17431
ENSXETG00000009355	smarca4	0.48	100	1	32	0.5	1	26.9	43.0355	419	15.5762
ENSXETG00000010327	nme4	0.48	0.5	4	9	0.8	0.7	3	3.65308	570	190
ENSXETG00000013593	mbd3	0.48	47	14	44	11	10	25.2	18.6199	372	14.7619
ENSXETG00000020481	fancl	0.48	2	8	15	5	2	6.4	5.41295	45.8	7.15625
ENSXETG00000021355	smarce1	0.48	219	54	143	44	37	99.4	79.4185	166	1.67002
ENSXETG00000025116	actb	0.48	2555	418	1444	687	210	1062.8	956.064	26754	25.1731
ENSXETG00000026196	msl2	0.48	21	7	21	4	6	11.8	8.46759	51.4	4.35593
ENSXETG00000027740	sav1	0.48	50	48	46	9	15	33.6	19.8822	96.1	2.86012
ENSXETG00000003055	mvb12a	0.47	25	12	34	15	5	18.2	11.3886	155	8.51648
ENSXETG00000003152	usp14	0.47	47	11	17	7	15	19.4	15.8997	157	8.09278
ENSXETG00000004336	ciao1	0.47	75	28	40	15	27	37	23.0109	116	3.13514
ENSXETG00000004708	tubgcp4	0.47	53	4	11	3	2	14.6	21.7555	94.6	6.47945
ENSXETG00000009113	mcm10	0.47	0.3	1	13	0.3	0.5	3.02	5.58632	1.17	0.387417
ENSXETG00000010098	eef1b2	0.47	241	547	896	1203	219	621.2	425.978	99	0.159369
ENSXETG00000013848	ctnnb1	0.47	485	375	268	47	34	241.8	199.188	68.5	0.283292
ENSXETG00000021568	arcn1	0.47	51	31	44	26	11	32.6	15.6621	50.5	1.54908
ENSXETG00000022671	znf598	0.47	19	5	27	8	5	12.8	9.80816	91.3	7.13281
ENSXETG00000023444	dhodh	0.47	25	20	18	10	15	17.6	5.59464	187	10.625
ENSXETG00000023711	rpl19	0.47	901	1023	2224	2213	616	1395.4	765.772	584	0.418518
ENSXETG00000026372	eef1g	0.47	1125	1425	2293	2183	1638	1732.8	497.406	436	0.251616
ENSXETG00000001986	ckap5	0.46	140	10	75	5	8	47.6	59.3405	324	6.80672
ENSXETG00000008275	mzt2b	0.46	77	6	12	3	6	20.8	31.5864	207	9.95192
ENSXETG00000013953	atg2b	0.46	15	7	12	3	6	8.6	4.82701	243	28.2558
ENSXETG00000016095	skp1	0.46	540	357	344	163	304	341.6	135.016	296	0.866511
ENSXETG00000016952	ppm1a	0.46	203	77	100	27	70	95.4	65.6909	27.9	0.292453
ENSXETG00000021445	chd6	0.46	4	3	12	1	2	4.4	4.39318	1.48	0.336364
ENSXETG00000022012	nod1	0.46	2	2	4	2	0.4	2.08	1.2775	1.26	0.605769
ENSXETG00000026189	rpl23a	0.46	1714	3990	3382	7894	1221	3640.2	2638.49	3682	1.01148
ENSXETG00000026602	gsto2	0.46	13	22	134	7	26	40.4	52.8517	310	7.67327
ENSXETG00000002066	eefsec	0.45	9	4	11	3	3	6	3.74166	150	25
ENSXETG00000004886	ndufa10	0.45	125	398	125	59	388	219	161.147	500	2.28311
ENSXETG00000006700	kdm3b	0.45	14	16	22	9	6	13.4	6.22896	34.3	2.5597
ENSXETG00000007937	calr	0.45	480	58	533	465	36	314.4	245.529	69.2	0.220102
ENSXETG00000009718	tpm1	0.45	44	2787	150	30	4044	1411	1883.62	256	0.181432
ENSXETG00000013339	sf3b1	0.45	69	30	57	21	27	40.8	20.9571	170	4.16667
ENSXETG00000016916	hmgb2	0.45	73	130	201	213	26	128.6	80.5996	90.9	0.706843
ENSXETG00000017286	psmd2	0.45	110	47	54	19	74	60.8	33.8334	191	3.14145
ENSXETG00000018402	pyroxd2	0.45	0.5	0.6	105	0.6	0.1	21.36	46.7566	93.2	4.3633
ENSXETG00000024480	ppp1cc	0.45	164	44	126	34	19	77.4	63.7793	11	0.142119
ENSXETG00000026415	rps25	0.45	998	3320	1969	6363	1278	2785.6	2191.95	1552	0.557151
ENSXETG00000033975	gapdh	0.45	5158	3411	4003	2550	20290	7082.4	7443.93	14978	2.11482
ENSXETG00000004794	txnrd3	0.44	45	35	79	45	26	46	20.0749	40.7	0.884783
ENSXETG00000005594	nacc1	0.44	99	11	42	5	7	32.8	39.94	80.1	2.44207
ENSXETG00000005702	rpia	0.44	30	8	28	16	5	17.4	11.349	431	24.7701
ENSXETG00000007189	stip1	0.44	137	51	96	37	59	76	40.4846	240	3.15789
ENSXETG00000007404	mpp6	0.44	4	2	10	2	1	3.8	3.63318	111	29.2105
ENSXETG00000008271	kidins220	0.44	120	20	47	5	16	41.6	46.4683	11.5	0.276442
ENSXETG00000010712	g3bp1	0.44	80	70	97	47	61	71	18.9341	658	9.26761
ENSXETG00000015030	fscn2	0.44	4	0.6	1	0.5	0.7	1.36	1.48762	454	333.824
ENSXETG00000015621	gfod2	0.44	12	8	16	9	4	9.8	4.49444	136	13.8776
ENSXETG00000016268	clic5	0.44	7	49	255	19	157	97.4	106.126	4325	44.4045
ENSXETG00000016987	zfp36l1	0.44	34	62	125	109	10	68	48.698	2.97	0.0436765
ENSXETG00000018149	gdi2	0.44	220	63	197	60	61	120.2	81.0228	637	5.2995
ENSXETG00000023038	ckb	0.44	1264	1496	347	19	5	626.2	706.377	7086	11.3159
ENSXETG00000024343	erlin2	0.44	9	13	60	16	5	20.6	22.4121	621	30.1456
ENSXETG00000024667	rpl31	0.44	956	2167	2155	4910	767	2191	1654.38	2824	1.28891
ENSXETG00000027487	sumo3	0.44	272	143	160	62	82	143.8	82.4755	112	0.77886
ENSXETG00000002868	ric8a	0.43	82	7	13	3	1	21.2	34.2958	95	4.48113
ENSXETG00000009036	pold1	0.43	7	2	22	2	1	6.8	8.81476	18.1	2.66176
ENSXETG00000010014	nolc1	0.43	21	10	32	9	14	17.2	9.52365	36.3	2.11047
ENSXETG00000012156	tom1l2	0.43	120	11	29	5	9	34.8	48.5098	37.6	1.08046
ENSXETG00000014234	psmc5	0.43	195	66	90	41	72	92.8	59.7637	85.6	0.922414
ENSXETG00000019486	ahcy	0.43	85	64	965	648	132	378.8	406.948	1072	2.82999
ENSXETG00000000334	g3bp2	0.42	79	5	37	9	4	26.8	32.1745	4916	183.433
ENSXETG00000003370	plxna3	0.42	110	3	24	0.7	1	27.74	47.0079	1.41	0.0508291
ENSXETG00000004148	herc2	0.42	41	9	22	4	12	17.6	14.639	13.9	0.789773
ENSXETG00000005121	slc16a9	0.42	2	3	52	0.1	0.8	11.58	22.6228	250	21.5889
ENSXETG00000013137	fubp1	0.42	65	23	57	20	12	35.4	23.881	118	3.33333
ENSXETG00000014008	kat2b	0.42	3	11	12	5	6	7.4	3.91152	44.5	6.01351
ENSXETG00000019687	tubb6	0.42	10	16	21	21	7	15	6.36396	2135	142.333
ENSXETG00000021080	tmem33	0.42	72	26	75	37	8	43.6	29.2113	139	3.18807
ENSXETG00000021782	baz2a	0.42	2	5	20	3	2	6.4	7.70065	43.2	6.75
ENSXETG00000021830	stat2	0.42	47	13	20	10	8	19.6	15.9781	80	4.08163
ENSXETG00000023588	sirt1	0.42	31	12	17	4	6	14	10.7935	51.9	3.70714
ENSXETG00000025864	hsbp1	0.42	291	197	191	49	70	159.6	99.8889	226	1.41604
ENSXETG00000025920	ENSXETG00000025920	0.42	15	6	13	3	3	8	5.65685	194	24.25
ENSXETG00000002746	ppm1b	0.41	114	53	66	20	45	59.6	34.7318	21.1	0.354027
ENSXETG00000007220	rps2	0.41	1787	2248	3762	4029	2159	2797	1021.96	978	0.34966
ENSXETG00000008971	ywhag	0.41	535	95	14	2	96	148.4	220.541	2722	18.3423
ENSXETG00000010497	nudcd1	0.41	21	7	14	9	5	11.2	6.41872	55	4.91071
ENSXETG00000016770	uggt1	0.41	1	4	11	5	2	4.6	3.91152	11.4	2.47826
ENSXETG00000018501	map4k3	0.41	15	36	13	4	11	15.8	12.0291	36.7	2.32278
ENSXETG00000027138	hspa4	0.41	176	39	74	13	45	69.4	63.4137	392	5.64841
ENSXETG00000001566	irs4	0.4	45	20	47	26	7	29	16.9853	87.5	3.01724
ENSXETG00000001756	mical3	0.4	73	30	27	1	8	27.8	28.1016	54.6	1.96403
ENSXETG00000002227	cct4	0.4	119	75	105	38	311	129.6	106.06	727	5.60957
ENSXETG00000002363	vwa5a.2	0.4	14	9	19	0.6	9	10.32	6.83462	37.3	3.61434
ENSXETG00000009316	eif4e	0.4	96	44	99	57	57	70.6	25.1456	145	2.05382
ENSXETG00000013380	mctp1	0.4	9	2	2	0.9	0.8	2.94	3.43628	2.77	0.942177
ENSXETG00000015100	ttc39c	0.4	17	10	10	0.4	7	8.88	5.99767	79	8.8964
ENSXETG00000017830	fbl	0.4	86	30	115	47	20	59.6	39.9036	184	3.08725
ENSXETG00000019647	fmr1	0.4	59	18	32	11	13	26.6	19.8822	55.5	2.08647
ENSXETG00000020396	jak1	0.4	17	18	30	11	10	17.2	7.98123	31.2	1.81395
ENSXETG00000021265	itga5	0.4	4	19	68	7	4	20.4	27.3185	39.8	1.95098
ENSXETG00000011223	gphn	0.39	162	16	21	16	13	45.6	65.1329	158	3.46491
ENSXETG00000022951	prkce	0.39	35	8	9	0.9	3	11.18	13.7372	267	23.8819
ENSXETG00000023004	rpl5	0.39	1032	3042	2764	4426	1677	2588.2	1310.19	549	0.212117
ENSXETG00000023059	calu	0.39	48	45	49	20	29	38.2	12.9885	892	23.3508
ENSXETG00000021515	mcc	0.38	7	5	9	2	2	5	3.08221	0.82	0.164
ENSXETG00000023567	hnrnph3	0.38	90	50	85	42	36	60.6	25.1157	45.3	0.747525
ENSXETG00000027073	rps4x	0.38	1375	2422	2394	3303	1599	2218.6	765.445	1602	0.722077
ENSXETG00000002914	rpl22	0.37	652	1339	1861	2902	513	1453.4	975.226	4721	3.24825
ENSXETG00000003925	thrap3	0.37	100	59	97	61	93	82	20.2485	51.7	0.630488
ENSXETG00000004436	e2f8	0.37	0.6	0.2	29	0.2	0.5	6.1	12.8027	62.9	10.3115
ENSXETG00000005467	mtap	0.37	42	20	36	25	8	26.2	13.3866	467	17.8244
ENSXETG00000006149	ascc1	0.37	15	12	18	8	6	11.8	4.91935	80.6	6.83051
ENSXETG00000007899	cxcl14	0.37	87	11	8	9	2	23.4	35.7113	938	40.0855
ENSXETG00000011340	nme2	0.37	1269	1919	1726	2225	1318	1691.4	404.839	11866	7.01549
ENSXETG00000021277	hnrnpa1	0.37	307	141	226	153	75	180.4	88.7682	370	2.051
ENSXETG00000025147	cnbp	0.37	296	129	253	140	209	205.4	71.7656	101	0.491723
ENSXETG00000028079	aloxe3	0.37	1	0.8	15	16	0.2	6.6	8.13757	10.8	1.63636
ENSXETG00000003617	fancd2	0.36	3	1	5	2	1	2.4	1.67332	2374	989.167
ENSXETG00000004744	ap5b1	0.36	4	3	5	3	3	3.6	0.894427	31.7	8.80556
ENSXETG00000005153	itpr1	0.36	54	8	22	2	2	17.6	21.9272	141	8.01136
ENSXETG00000005359	hsp90b1	0.36	97	29	115	110	11	72.4	48.7011	1081	14.9309
ENSXETG00000007448	pter	0.36	9	21	88	19	21	31.6	31.9186	97.3	3.07911
ENSXETG00000012516	sumo2	0.36	232	56	89	68	14	91.8	83.0133	230	2.50545
ENSXETG00000013573	pdcd5	0.36	120	92	94	68	125	99.8	23.1776	144	1.44289
ENSXETG00000014020	igf2	0.36	2	9	70	111	0.4	38.48	49.7559	320	8.31601
ENSXETG00000018321	hnrnph1	0.36	132	43	101	44	24	68.8	45.6037	209	3.03779
ENSXETG00000026022	rnf2	0.36	66	26	27	10	6	27	23.7276	60.9	2.25556
ENSXETG00000026830	twf1	0.36	3	4	12	4	0.9	4.78	4.22989	37.2	7.78243
ENSXETG00000027498	ENSXETG00000027498	0.36	1906	976	1405	379	396	1012.4	658.621	2786	2.75188
ENSXETG00000032616	TP53BP1	0.36	68	3	15	2	2	18	28.4868	0.862	0.0478889
ENSXETG00000002216	slc8a3	0.35	11	1	0.6	0.4	30	8.6	12.7742	46.2	5.37209
ENSXETG00000003796	shank2	0.35	56	0.2	21	4	0.1	16.26	23.8281	70	4.30504
ENSXETG00000007790	mtmr4	0.35	62	17	22	4	18	24.6	21.9727	8.1	0.329268
ENSXETG00000009582	med8	0.35	4	3	5	2	1	3	1.58114	248	82.6667
ENSXETG00000013647	rpl27	0.35	1168	2202	1929	2970	842	1822.2	845.853	7602	4.17188
ENSXETG00000013841	lemd3	0.35	38	12	51	10	5	23.2	20.142	108	4.65517
ENSXETG00000019471	tp53inp2	0.35	3	74	11	5	31	24.8	29.6513	7.57	0.305242
ENSXETG00000025533	lypla2	0.35	221	49	141	53	19	96.6	83.1192	64.8	0.670807
ENSXETG00000034346	DPYSL2	0.35	618	7	51	0.9	5	136.38	270.001	95.4	0.699516
ENSXETG00000002012	rps21	0.34	1076	2863	2054	4743	590	2265.2	1640.27	464	0.204838
ENSXETG00000006272	ENSXETG00000006272	0.34	2	1	30	1	0.6	6.92	12.9125	80.8	11.6763
ENSXETG00000006331	rangap1	0.34	46	3	14	3	3	13.8	18.6199	101	7.31884
ENSXETG00000006357	csnk1e	0.34	113	19	65	11	15	44.6	44.0318	90.6	2.03139
ENSXETG00000006537	psmd6	0.34	95	33	62	22	56	53.6	28.3425	81.3	1.51679
ENSXETG00000008663	flnb	0.34	50	6	102	10	7	35	41.7253	7.78	0.222286
ENSXETG00000009486	smarcc2	0.34	94	28	32	9	26	37.8	32.6221	11.8	0.312169
ENSXETG00000011808	pak2	0.34	4	8	28	8	8	11.2	9.54987	112	10
ENSXETG00000012658	pcbp3	0.34	917	683	988	627	449	732.8	219.814	452	0.616812
ENSXETG00000015863	vac14	0.34	122	25	52	8	18	45	46.0326	46.3	1.02889
ENSXETG00000016634	pofut1	0.34	22	9	28	11	4	14.8	9.88433	75.5	5.10135
ENSXETG00000017438	aip	0.34	65	35	26	10	31	33.4	20.0574	50.2	1.50299
ENSXETG00000019512	pik3r6	0.34	55	8	54	14	37	33.6	21.9386	136	4.04762
ENSXETG00000028029	asf1b	0.34	47	16	51	14	18	29.2	18.1852	869	29.7603
ENSXETG00000005633	mta2	0.33	116	46	97	35	21	63	41.2371	867	13.7619
ENSXETG00000012613	becn1	0.33	123	89	36	16	28	58.4	45.6432	1776	30.411
ENSXETG00000025968	ENSXETG00000025968	0.33	13	3	13	4	2	7	5.52268	81.9	11.7
ENSXETG00000000520	jmy	0.32	2	6	9	2	2	4.2	3.19374	27.6	6.57143
ENSXETG00000003240	mapt	0.32	598	18	47	35	81	155.8	248.271	445	2.85623
ENSXETG00000004757	aldh9a1	0.32	96	125	477	720	75	298.6	287.483	45	0.150703
ENSXETG00000005253	hdac1	0.32	34	16	59	24	6	27.8	20.2534	735	26.4388
ENSXETG00000008804	atf5.2	0.32	32	26	30	19	53	32	12.7475	3.63	0.113437
ENSXETG00000011463	psmb7	0.32	108	65	53	40	52	63.6	26.3496	216	3.39623
ENSXETG00000020454	krt8	0.32	133	35	453	140	7	153.6	177.347	2725	17.7409
ENSXETG00000009458	rps26	0.31	1487	2531	1576	5108	928	2326	1658.49	1990	0.855546
ENSXETG00000009517	ncl	0.31	251	109	276	119	63	163.6	94.0255	100	0.611247
ENSXETG00000010946	pabpc4	0.31	43	61	17	8	144	54.6	54.2061	205	3.75458
ENSXETG00000020022	gnao1	0.31	442	24	6	1	0.9	94.78	194.333	415	4.37856
ENSXETG00000028025	srm	0.31	23	6	12	5	8	10.8	7.32803	207	19.1667
ENSXETG00000001806	hnrnpa3	0.3	413	167	245	201	124	230	111.535	101	0.43913
ENSXETG00000002869	ENSXETG00000002869	0.3	26	3	36	7	2	14.8	15.3199	52	3.51351
ENSXETG00000007996	dynll1	0.3	208	68	131	80	18	101	72.0555	452	4.47525
[truncated: 269 more rows]

## Sheet: C. elegans
gene_ID	gene_name	transcript_ID	DBF_score	TPM_value	ppm_value	ppm_TPM_ratio		Avg. values for specific fractions
[truncated: 6,635 more rows]

[truncated: 1 more sheets: A. thaliana]
